# Supplementary material for: Multi-epitope vaccine construct against bovine tuberculosis: insights from immunoinformatics and molecular dynamics simulations
Source: Research Square preprint supplement (doi:10.21203/rs.3.rs-8331959/v1), 2025-12-16
Supplement: Supplementary file 1 [file 5be7ae1a755b62d18035e678.docx]

**Supplementary Information for**

**Multi-epitope vaccine construct against bovine tuberculosis: insights from immunoinformatics and molecular dynamics simulations**

**Table S1.** Alphafold2 prediction results of the candidate vaccine. The Model Rank 1 colored in gray was used for the refinement.

| **Model Rank** | **Mean pLDDT** | **Max PAE** | **pTM** |
| --- | --- | --- | --- |
| 1 | 69.57 | 31.33 | 0.58 |
| 2 | 67.77 | 30.92 | 0.58 |
| 3 | 67.32 | 31.41 | 0.61 |
| 4 | 66.28 | 31.39 | 0.6 |
| 5 | 64.73 | 31.44 | 0.59 |

**Table S2.** GalaxyRefine results of the Alphafold2 Model Rank 1. The model colored in gray was used as the candidate vaccine structure.

| **Model** | **GDT-HA** | **RMSD** | **MolProbity** | **Clash score** | **Poor rotamers** | **Rama favored** |
| --- | --- | --- | --- | --- | --- | --- |
| Initial | 1.0000 | 0.00 | 3.005 | 26.7 | 2.4 | 73.7 |
| MODEL 1 | 0.8990 | 0.643 | 1.498 | 7.5 | 0.7 | 97.6 |
| MODEL 2 | 0.9170 | 0.579 | 1.796 | 8.7 | 0.3 | 95.3 |
| MODEL 3 | 0.9178 | 0.576 | 1.794 | 9.0 | 0.6 | 95.5 |
| MODEL 4 | 0.9165 | 0.579 | 1.810 | 8.7 | 0.3 | 95.1 |
| MODEL 5 | 0.9178 | 0.581 | 1.790 | 8.6 | 0.3 | 95.3 |

**Table S3.** Cluspro results for the VdW+Elec favored model. The model colored in gray was used for the molecular dynamics simulation.

| **Cluster** | **Members** | **Representative** | **Weighted Score** |
| --- | --- | --- | --- |
| 0 | 33 | Center | -268.4 |
| 0 | 33 | Lowest Energy | -300.6 |
| 1 | 28 | Center | -261.2 |
| 1 | 28 | Lowest Energy | -270.7 |
| 2 | 27 | Center | -237.1 |
| 2 | 27 | Lowest Energy | -292.9 |
| 3 | 24 | Center | -273.6 |
| 3 | 24 | Lowest Energy | -294 |
| 4 | 23 | Center | -253.3 |
| 4 | 23 | Lowest Energy | -290.4 |
| 5 | 20 | Center | -245.5 |
| 5 | 20 | Lowest Energy | -277.7 |
| 6 | 19 | Center | -260.4 |
| 6 | 19 | Lowest Energy | -270.1 |
| 7 | 18 | Center | -252.9 |
| 7 | 18 | Lowest Energy | -265.5 |
| 8 | 16 | Center | -235.7 |
| 8 | 16 | Lowest Energy | -254.7 |
| 9 | 15 | Center | -260.3 |
| 9 | 15 | Lowest Energy | -260.3 |
| 10 | 14 | Center | -243.2 |
| 10 | 14 | Lowest Energy | -290.3 |
| 11 | 14 | Center | -245.5 |
| 11 | 14 | Lowest Energy | -275.2 |
| 12 | 14 | Center | -236.4 |
| 12 | 14 | Lowest Energy | -282.6 |
| 13 | 12 | Center | -271.6 |
| 13 | 12 | Lowest Energy | -271.6 |
| 14 | 11 | Center | -288.5 |
| 14 | 11 | Lowest Energy | -288.5 |
| 15 | 10 | Center | -248.2 |
| 15 | 10 | Lowest Energy | -277.1 |
| 16 | 10 | Center | -237.4 |
| 16 | 10 | Lowest Energy | -266 |
| 17 | 10 | Center | -262.6 |
| 17 | 10 | Lowest Energy | -262.6 |
| 18 | 10 | Center | -297.9 |
| 18 | 10 | Lowest Energy | -297.9 |
| 19 | 10 | Center | -267.7 |
| 19 | 10 | Lowest Energy | -267.7 |
| 20 | 10 | Center | -236.2 |
| 20 | 10 | Lowest Energy | -257.1 |
| 21 | 9 | Center | -263.9 |
| 21 | 9 | Lowest Energy | -271.4 |
| 22 | 9 | Center | -243.3 |
| 22 | 9 | Lowest Energy | -267.4 |
| 23 | 8 | Center | -254.5 |
| 23 | 8 | Lowest Energy | -262.1 |
| 24 | 8 | Center | -237.5 |
| 24 | 8 | Lowest Energy | -244.9 |
| 25 | 7 | Center | -241.7 |
| 25 | 7 | Lowest Energy | -288.6 |
| 26 | 7 | Center | -255.8 |
| 26 | 7 | Lowest Energy | -277.8 |
| 27 | 7 | Center | -238.8 |
| 27 | 7 | Lowest Energy | -254.2 |
| 28 | 6 | Center | -246.4 |
| 28 | 6 | Lowest Energy | -274.9 |
| 29 | 6 | Center | -237.3 |
| 29 | 6 | Lowest Energy | -267.8 |
