# Supplementary material for: Multi-epitope vaccine construct against bovine tuberculosis: insights from immunoinformatics and molecular dynamics simulations
Source: Research Square preprint supplement (doi:10.21203/rs.3.rs-8331959/v1), 2025-12-16
Supplement: Supplementary file 2 [file b3297ed290dafc4b3a9d6b54.xlsx]

## Sheet: MHC1 Epitope Candidate
Pos	MHC	Peptide	Core	Of	Gp	Gl	Ip	Il	Icore	Identifier	Score_EL	%Rank_EL	Score_BA	%Rank_BA	Aff(nM)	BindLevel
277	BoLA-HD6	RAKIVADYL	RAKIVADYL	0	0	0	0	0	RAKIVADYL	OmpA	0.432481	0.637	0.590888	0.364	83.64	WB
315	BoLA-HD6	RAKNRRVEI	RAKNRRVEI	0	0	0	0	0	RAKNRRVEI	OmpA	0.368422	0.8	0.471377	0.97	304.78	WB
125	BoLA-HD6	HVDPVVRSL	HVDPVVRSL	0	0	0	0	0	HVDPVVRSL	OmpA	0.207127	1.45	0.205418	6.967	5416.48	WB
105	BoLA-HD6	ALMTALNGL	ALMTALNGL	0	0	0	0	0	ALMTALNGL	OmpA	0.175935	1.67	0.460739	1.045	341.96	WB
239	BoLA-HD6	ILNRVADKL	ILNRVADKL	0	0	0	0	0	ILNRVADKL	OmpA	0.173843	1.686	0.390114	1.75	734.24	WB
48	BoLA-HD6	GAFERPQSV	GAFERPQSV	0	0	0	0	0	GAFERPQSV	OmpA	0.172758	1.694	0.288225	3.677	2211.11	WB
33	BoLA-JSP.1	IGAVVIPLL	IGAVVIPLL	0	0	0	0	0	IGAVVIPLL	OmpA	0.489839	0.203	0.289788	0.261	2174.03	SB
145	BoLA-JSP.1	SVPIPDFGL	SVPIPDFGL	0	0	0	0	0	SVPIPDFGL	OmpA	0.464284	0.232	0.230036	0.692	4149.9	SB
37	BoLA-JSP.1	VIPLLIAAI	VIPLLIAAI	0	0	0	0	0	VIPLLIAAI	OmpA	0.37165	0.394	0.283334	0.292	2331.27	SB
74	BoLA-JSP.1	ASALSLSLL	ASALSLSLL	0	0	0	0	0	ASALSLSLL	OmpA	0.336413	0.503	0.269971	0.368	2693.92	WB
73	BoLA-JSP.1	GASALSLSL	GASALSLSL	0	0	0	0	0	GASALSLSL	OmpA	0.260684	0.816	0.197605	1.24	5894.27	WB
249	BoLA-JSP.1	ACPDARVTI	ACPDARVTI	0	0	0	0	0	ACPDARVTI	OmpA	0.251259	0.867	0.172106	1.968	7766.92	WB
24	BoLA-JSP.1	RGSPGRPWL	RGSPGRPWL	0	0	0	0	0	RGSPGRPWL	OmpA	0.223831	1.063	0.177932	1.788	7292.44	WB
125	BoLA-JSP.1	HVDPVVRSL	HVDPVVRSL	0	0	0	0	0	HVDPVVRSL	OmpA	0.219019	1.103	0.104168	7.356	16199	WB
69	BoLA-JSP.1	TSTRGASAL	TSTRGASAL	0	0	0	0	0	TSTRGASAL	OmpA	0.218095	1.11	0.211622	0.965	5064.83	WB
277	BoLA-JSP.1	RAKIVADYL	RAKIVADYL	0	0	0	0	0	RAKIVADYL	OmpA	0.216401	1.123	0.172101	1.968	7767.34	WB
102	BoLA-JSP.1	AKAALMTAL	AKAALMTAL	0	0	0	0	0	AKAALMTAL	OmpA	0.199561	1.267	0.201332	1.157	5661.31	WB
25	BoLA-JSP.1	GSPGRPWLI	GSPGRPWLI	0	0	0	0	0	GSPGRPWLI	OmpA	0.192563	1.346	0.151353	2.958	9722.25	WB
232	BoLA-JSP.1	LIPADYEIL	LIPADYEIL	0	0	0	0	0	LIPADYEIL	OmpA	0.15335	1.833	0.146005	3.267	10301.4	WB
125	BoLA-T2c	HVDPVVRSL	HVDPVVRSL	0	0	0	0	0	HVDPVVRSL	OmpA	0.945741	0.051	0.546426	0.423	135.31	SB
231	BoLA-T2c	SLIPADYEI	SLIPADYEI	0	0	0	0	0	SLIPADYEI	OmpA	0.905791	0.107	0.730662	0.065	18.43	SB
105	BoLA-T2c	ALMTALNGL	ALMTALNGL	0	0	0	0	0	ALMTALNGL	OmpA	0.831307	0.223	0.703141	0.093	24.83	SB
210	BoLA-T2c	DLQSAINAV	DLQSAINAV	0	0	0	0	0	DLQSAINAV	OmpA	0.74836	0.407	0.579913	0.317	94.18	SB
239	BoLA-T2c	ILNRVADKL	ILNRVADKL	0	0	0	0	0	ILNRVADKL	OmpA	0.726812	0.469	0.531508	0.479	159.01	SB
55	BoLA-T2c	SVTGPTGVL	SVTGPTGVL	0	0	0	0	0	SVTGPTGVL	OmpA	0.725493	0.472	0.492814	0.633	241.69	SB
113	BoLA-T2c	LLAPGVNVI	LLAPGVNVI	0	0	0	0	0	LLAPGVNVI	OmpA	0.720844	0.485	0.553446	0.398	125.41	SB
48	BoLA-T2c	GAFERPQSV	GAFERPQSV	0	0	0	0	0	GAFERPQSV	OmpA	0.614462	0.824	0.352897	1.745	1098.29	WB
58	BoLA-T2c	GPTGVLPTL	GPTGVLPTL	0	0	0	0	0	GPTGVLPTL	OmpA	0.580659	0.951	0.332843	2.006	1364.43	WB
73	BoLA-T2c	GASALSLSL	GASALSLSL	0	0	0	0	0	GASALSLSL	OmpA	0.574732	0.976	0.397072	1.264	680.99	WB
83	BoLA-T2c	SISRSGNTV	SISRSGNTV	0	0	0	0	0	SISRSGNTV	OmpA	0.539608	1.139	0.437849	0.962	438.06	WB
32	BoLA-T2c	LIGAVVIPL	LIGAVVIPL	0	0	0	0	0	LIGAVVIPL	OmpA	0.536977	1.152	0.50885	0.566	203.19	WB
145	BoLA-T2c	SVPIPDFGL	SVPIPDFGL	0	0	0	0	0	SVPIPDFGL	OmpA	0.536875	1.152	0.341877	1.886	1237.37	WB
154	BoLA-T2c	KVERDTVTL	KVERDTVTL	0	0	0	0	0	KVERDTVTL	OmpA	0.528195	1.194	0.323962	2.15	1502.04	WB
217	BoLA-T2c	AVTGGPIAF	AVTGGPIAF	0	0	0	0	0	AVTGGPIAF	OmpA	0.495613	1.391	0.307296	2.418	1798.85	WB
76	BoLA-T2c	ALSLSLLSI	ALSLSLLSI	0	0	0	0	0	ALSLSLLSI	OmpA	0.462984	1.579	0.406278	1.189	616.43	WB
290	BoLA-T2c	VAGDHIATV	VAGDHIATV	0	0	0	0	0	VAGDHIATV	OmpA	0.453483	1.638	0.346535	1.827	1176.56	WB
106	BoLA-T2c	LMTALNGLL	LMTALNGLL	0	0	0	0	0	LMTALNGLL	OmpA	0.427306	1.815	0.513813	0.546	192.57	WB
37	BoLA-T2c	VIPLLIAAI	VIPLLIAAI	0	0	0	0	0	VIPLLIAAI	OmpA	0.424477	1.833	0.379713	1.45	821.69	WB
99	BoLA-T2b	DEAAKAALM	DEAAKAALM	0	0	0	0	0	DEAAKAALM	OmpA	0.189354	0.438	0.301467	0.283	1915.96	SB
138	BoLA-T2b	AEPVFTASV	AEPVFTASV	0	0	0	0	0	AEPVFTASV	OmpA	0.075575	1.109	0.234979	0.634	3933.78	WB
235	BoLA-T2b	ADYEILNRV	ADYEILNRV	0	0	0	0	0	ADYEILNRV	OmpA	0.059891	1.339	0.169611	1.468	7979.45	WB
85	BoLA-T2b	SRSGNTVTL	SRSGNTVTL	0	0	0	0	0	SRSGNTVTL	OmpA	0.03907	1.87	0.104361	4.302	16165.2	WB
125	BoLA-T2b	HVDPVVRSL	HVDPVVRSL	0	0	0	0	0	HVDPVVRSL	OmpA	0.035498	2	0.068354	10.229	23865.8	WB
164	BoLA-T2a	GTAPSSEHK	GTAPSSEHK	0	0	0	0	0	GTAPSSEHK	OmpA	0.699943	0.227	0.275613	0.641	2534.39	SB
179	BoLA-T2a	ATSTWPDMK	ATSTWPDMK	0	0	0	0	0	ATSTWPDMK	OmpA	0.582184	0.423	0.265118	0.742	2839.15	SB
13	BoLA-T2a	TTDARRTQK	TTDARRTQK	0	0	0	0	0	TTDARRTQK	OmpA	0.527768	0.539	0.225761	1.214	4346.36	WB
280	BoLA-T2a	IVADYLVAR	IVADYLVAR	0	0	0	0	0	IVADYLVAR	OmpA	0.338086	1.195	0.175952	2.23	7450.35	WB
269	BoLA-T2a	INIPLSAQR	INIPLSAQR	0	0	0	0	0	INIPLSAQR	OmpA	0.31963	1.273	0.175803	2.234	7462.37	WB
307	BoLA-T2a	ASNATPEGR	ASNATPEGR	0	0	0	0	0	ASNATPEGR	OmpA	0.31355	1.299	0.156391	2.832	9206.47	WB
131	BoLA-T2a	RSLDFSSAE	RSLDFSSAE	0	0	0	0	0	RSLDFSSAE	OmpA	0.230924	1.84	0.183284	2.042	6882.15	WB
168	BoLA-T2a	SSEHKDAVK	SSEHKDAVK	0	0	0	0	0	SSEHKDAVK	OmpA	0.218387	1.936	0.166752	2.465	8230.14	WB
125	BoLA-T7	HVDPVVRSL	HVDPVVRSL	0	0	0	0	0	HVDPVVRSL	OmpA	0.541337	0.009	0.20697	0.674	5326.28	SB
48	BoLA-T7	GAFERPQSV	GAFERPQSV	0	0	0	0	0	GAFERPQSV	OmpA	0.381328	0.065	0.206894	0.675	5330.67	SB
290	BoLA-T7	VAGDHIATV	VAGDHIATV	0	0	0	0	0	VAGDHIATV	OmpA	0.280745	0.205	0.228415	0.416	4223.33	SB
55	BoLA-T7	SVTGPTGVL	SVTGPTGVL	0	0	0	0	0	SVTGPTGVL	OmpA	0.254765	0.282	0.249844	0.243	3349.35	SB
231	BoLA-T7	SLIPADYEI	SLIPADYEI	0	0	0	0	0	SLIPADYEI	OmpA	0.246761	0.313	0.231577	0.385	4081.28	SB
83	BoLA-T7	SISRSGNTV	SISRSGNTV	0	0	0	0	0	SISRSGNTV	OmpA	0.203335	0.521	0.235203	0.35	3924.26	WB
69	BoLA-T7	TSTRGASAL	TSTRGASAL	0	0	0	0	0	TSTRGASAL	OmpA	0.181093	0.693	0.2483	0.252	3405.77	WB
145	BoLA-T7	SVPIPDFGL	SVPIPDFGL	0	0	0	0	0	SVPIPDFGL	OmpA	0.168004	0.818	0.175825	1.339	7460.6	WB
239	BoLA-T7	ILNRVADKL	ILNRVADKL	0	0	0	0	0	ILNRVADKL	OmpA	0.165497	0.848	0.181703	1.174	7000.89	WB
74	BoLA-T7	ASALSLSLL	ASALSLSLL	0	0	0	0	0	ASALSLSLL	OmpA	0.154892	0.97	0.207327	0.67	5305.75	WB
113	BoLA-T7	LLAPGVNVI	LLAPGVNVI	0	0	0	0	0	LLAPGVNVI	OmpA	0.15252	0.997	0.187595	1.03	6568.51	WB
154	BoLA-T7	KVERDTVTL	KVERDTVTL	0	0	0	0	0	KVERDTVTL	OmpA	0.13947	1.173	0.131313	3.424	12076.3	WB
315	BoLA-T7	RAKNRRVEI	RAKNRRVEI	0	0	0	0	0	RAKNRRVEI	OmpA	0.128599	1.35	0.133979	3.24	11732.9	WB
73	BoLA-T7	GASALSLSL	GASALSLSL	0	0	0	0	0	GASALSLSL	OmpA	0.128354	1.354	0.166957	1.638	8211.91	WB
105	BoLA-T7	ALMTALNGL	ALMTALNGL	0	0	0	0	0	ALMTALNGL	OmpA	0.127196	1.372	0.194064	0.898	6124.48	WB
54	BoLA-T7	QSVTGPTGV	QSVTGPTGV	0	0	0	0	0	QSVTGPTGV	OmpA	0.117854	1.542	0.15899	1.934	8951.19	WB
25	BoLA-T7	GSPGRPWLI	GSPGRPWLI	0	0	0	0	0	GSPGRPWLI	OmpA	0.117012	1.558	0.125715	3.86	12830.4	WB
33	BoLA-T7	IGAVVIPLL	IGAVVIPLL	0	0	0	0	0	IGAVVIPLL	OmpA	0.114575	1.604	0.151445	2.26	9712.57	WB
277	BoLA-T7	RAKIVADYL	RAKIVADYL	0	0	0	0	0	RAKIVADYL	OmpA	0.11157	1.674	0.13265	3.332	11902.9	WB
136	BoLA-T7	SSAEPVFTA	SSAEPVFTA	0	0	0	0	0	SSAEPVFTA	OmpA	0.107055	1.791	0.138601	2.935	11160.6	WB
37	BoLA-T7	VIPLLIAAI	VIPLLIAAI	0	0	0	0	0	VIPLLIAAI	OmpA	0.105414	1.835	0.171226	1.486	7841.23	WB
102	BoLA-D18.4	AKAALMTAL	AKAALMTAL	0	0	0	0	0	AKAALMTAL	OmpA	0.798459	0.069	0.523261	0.054	173.85	SB
175	BoLA-D18.4	VKRAATSTW	VKRAATSTW	0	0	0	0	0	VKRAATSTW	OmpA	0.560643	0.317	0.393779	0.317	705.69	SB
85	BoLA-D18.4	SRSGNTVTL	SRSGNTVTL	0	0	0	0	0	SRSGNTVTL	OmpA	0.504114	0.403	0.322758	0.744	1521.74	SB
196	BoLA-D18.4	GQAPPGPPA	GQAPPGPPA	0	0	0	0	0	GQAPPGPPA	OmpA	0.434201	0.55	0.362004	0.458	995.23	WB
48	BoLA-D18.4	GAFERPQSV	GAFERPQSV	0	0	0	0	0	GAFERPQSV	OmpA	0.404452	0.619	0.247328	1.921	3441.78	WB
276	BoLA-D18.4	QRAKIVADY	QRAKIVADY	0	0	0	0	0	QRAKIVADY	OmpA	0.260634	1.217	0.233799	2.273	3984.33	WB
316	BoLA-D18.4	AKNRRVEIV	AKNRRVEIV	0	0	0	0	0	AKNRRVEIV	OmpA	0.251644	1.277	0.242352	2.048	3632.16	WB
186	BoLA-D18.4	MKIVNNIEV	MKIVNNIEV	0	0	0	0	0	MKIVNNIEV	OmpA	0.238862	1.36	0.333553	0.655	1353.99	WB
71	BoLA-D18.4	TRGASALSL	TRGASALSL	0	0	0	0	0	TRGASALSL	OmpA	0.19558	1.726	0.224016	2.54	4429.2	WB
217	BoLA-D18.4	AVTGGPIAF	AVTGGPIAF	0	0	0	0	0	AVTGGPIAF	OmpA	0.184908	1.831	0.1906	3.904	6358.38	WB
125	BoLA-D18.4	HVDPVVRSL	HVDPVVRSL	0	0	0	0	0	HVDPVVRSL	OmpA	0.183532	1.846	0.126944	9.583	12660.9	WB
33	BoLA-AW10	IGAVVIPLL	IGAVVIPLL	0	0	0	0	0	IGAVVIPLL	OmpA	0.160956	0.099	0.169744	0.096	7967.98	SB
24	BoLA-AW10	RGSPGRPWL	RGSPGRPWL	0	0	0	0	0	RGSPGRPWL	OmpA	0.099377	0.24	0.130645	0.299	12163.9	SB
25	BoLA-AW10	GSPGRPWLI	GSPGRPWLI	0	0	0	0	0	GSPGRPWLI	OmpA	0.094841	0.262	0.108725	0.609	15419.6	SB
74	BoLA-AW10	ASALSLSLL	ASALSLSLL	0	0	0	0	0	ASALSLSLL	OmpA	0.069051	0.48	0.126134	0.349	12772.3	SB
145	BoLA-AW10	SVPIPDFGL	SVPIPDFGL	0	0	0	0	0	SVPIPDFGL	OmpA	0.066797	0.51	0.093204	1.042	18239.3	WB
85	BoLA-AW10	SRSGNTVTL	SRSGNTVTL	0	0	0	0	0	SRSGNTVTL	OmpA	0.061672	0.581	0.075502	1.989	22089.6	WB
290	BoLA-AW10	VAGDHIATV	VAGDHIATV	0	0	0	0	0	VAGDHIATV	OmpA	0.05511	0.675	0.075527	1.987	22083.7	WB
249	BoLA-AW10	ACPDARVTI	ACPDARVTI	0	0	0	0	0	ACPDARVTI	OmpA	0.052622	0.717	0.089526	1.186	18979.7	WB
48	BoLA-AW10	GAFERPQSV	GAFERPQSV	0	0	0	0	0	GAFERPQSV	OmpA	0.049703	0.781	0.054659	4.852	27677.6	WB
73	BoLA-AW10	GASALSLSL	GASALSLSL	0	0	0	0	0	GASALSLSL	OmpA	0.048874	0.799	0.088916	1.211	19105.4	WB
102	BoLA-AW10	AKAALMTAL	AKAALMTAL	0	0	0	0	0	AKAALMTAL	OmpA	0.047188	0.84	0.093107	1.047	18258.4	WB
277	BoLA-AW10	RAKIVADYL	RAKIVADYL	0	0	0	0	0	RAKIVADYL	OmpA	0.04373	0.943	0.074292	2.094	22380.7	WB
125	BoLA-AW10	HVDPVVRSL	HVDPVVRSL	0	0	0	0	0	HVDPVVRSL	OmpA	0.042247	1.005	0.041372	9.166	31956.9	WB
37	BoLA-AW10	VIPLLIAAI	VIPLLIAAI	0	0	0	0	0	VIPLLIAAI	OmpA	0.040652	1.054	0.104603	0.689	16122.9	WB
298	BoLA-AW10	VGLGSVNPI	VGLGSVNPI	0	0	0	0	0	VGLGSVNPI	OmpA	0.037418	1.172	0.13639	0.253	11430.8	WB
69	BoLA-AW10	TSTRGASAL	TSTRGASAL	0	0	0	0	0	TSTRGASAL	OmpA	0.037089	1.185	0.096819	0.907	17539.6	WB
315	BoLA-AW10	RAKNRRVEI	RAKNRRVEI	0	0	0	0	0	RAKNRRVEI	OmpA	0.031098	1.503	0.056106	4.535	27247.7	WB
138	BoLA-AW10	AEPVFTASV	AEPVFTASV	0	0	0	0	0	AEPVFTASV	OmpA	0.02991	1.575	0.080459	1.642	20936.1	WB
225	BoLA-AW10	FGNDGASLI	FGNDGASLI	0	0	0	0	0	FGNDGASLI	OmpA	0.02957	1.595	0.094687	0.983	17948.9	WB
232	BoLA-AW10	LIPADYEIL	LIPADYEIL	0	0	0	0	0	LIPADYEIL	OmpA	0.02887	1.656	0.074888	2.041	22236.9	WB
58	BoLA-AW10	GPTGVLPTL	GPTGVLPTL	0	0	0	0	0	GPTGVLPTL	OmpA	0.027296	1.779	0.046414	7.131	30260.2	WB
57	BoLA-AW10	TGPTGVLPT	TGPTGVLPT	0	0	0	0	0	TGPTGVLPT	OmpA	0.02698	1.802	0.10553	0.671	15962	WB
136	BoLA-AW10	SSAEPVFTA	SSAEPVFTA	0	0	0	0	0	SSAEPVFTA	OmpA	0.024618	1.998	0.06205	3.486	25550.5	WB
102	BoLA-T5	AKAALMTAL	AKAALMTAL	0	0	0	0	0	AKAALMTAL	OmpA	0.28246	0.426	0.316445	0.425	1629.31	SB
196	BoLA-T5	GQAPPGPPA	GQAPPGPPA	0	0	0	0	0	GQAPPGPPA	OmpA	0.247931	0.526	0.275557	0.756	2535.92	WB
85	BoLA-T5	SRSGNTVTL	SRSGNTVTL	0	0	0	0	0	SRSGNTVTL	OmpA	0.217721	0.65	0.212286	1.912	5028.57	WB
276	BoLA-T5	QRAKIVADY	QRAKIVADY	0	0	0	0	0	QRAKIVADY	OmpA	0.191483	0.784	0.218356	1.748	4708.92	WB
48	BoLA-T5	GAFERPQSV	GAFERPQSV	0	0	0	0	0	GAFERPQSV	OmpA	0.176893	0.873	0.153827	4.61	9465.46	WB
175	BoLA-T5	VKRAATSTW	VKRAATSTW	0	0	0	0	0	VKRAATSTW	OmpA	0.132345	1.213	0.202681	2.202	5579.28	WB
117	BoLA-T5	GVNVIDQIH	GVNVIDQIH	0	0	0	0	0	GVNVIDQIH	OmpA	0.128335	1.264	0.176047	3.267	7442.7	WB
163	BoLA-T5	TGTAPSSEH	TGTAPSSEH	0	0	0	0	0	TGTAPSSEH	OmpA	0.124197	1.314	0.173043	3.416	7688.58	WB
217	BoLA-T5	AVTGGPIAF	AVTGGPIAF	0	0	0	0	0	AVTGGPIAF	OmpA	0.091065	1.816	0.158086	4.306	9039.17	WB
125	BoLA-T5	HVDPVVRSL	HVDPVVRSL	0	0	0	0	0	HVDPVVRSL	OmpA	0.090587	1.825	0.091027	13.95	18674	WB
117	BoLA-1:00901	GVNVIDQIH	GVNVIDQIH	0	0	0	0	0	GVNVIDQIH	OmpA	0.741648	0.115	0.38083	0.407	811.82	SB
163	BoLA-1:00901	TGTAPSSEH	TGTAPSSEH	0	0	0	0	0	TGTAPSSEH	OmpA	0.346619	0.645	0.217832	2.462	4735.7	WB
196	BoLA-1:00901	GQAPPGPPA	GQAPPGPPA	0	0	0	0	0	GQAPPGPPA	OmpA	0.289897	0.825	0.274522	1.305	2564.48	WB
48	BoLA-1:00901	GAFERPQSV	GAFERPQSV	0	0	0	0	0	GAFERPQSV	OmpA	0.271201	0.895	0.176841	4.013	7379.03	WB
217	BoLA-1:00901	AVTGGPIAF	AVTGGPIAF	0	0	0	0	0	AVTGGPIAF	OmpA	0.22922	1.085	0.208082	2.764	5262.58	WB
286	BoLA-1:00901	VARGVAGDH	VARGVAGDH	0	0	0	0	0	VARGVAGDH	OmpA	0.202838	1.225	0.285697	1.16	2272.42	WB
125	BoLA-1:00901	HVDPVVRSL	HVDPVVRSL	0	0	0	0	0	HVDPVVRSL	OmpA	0.170614	1.449	0.115337	9.93	14355	WB
102	BoLA-1:00902	AKAALMTAL	AKAALMTAL	0	0	0	0	0	AKAALMTAL	OmpA	0.28246	0.426	0.316445	0.425	1629.31	SB
196	BoLA-1:00902	GQAPPGPPA	GQAPPGPPA	0	0	0	0	0	GQAPPGPPA	OmpA	0.247931	0.526	0.275557	0.756	2535.92	WB
85	BoLA-1:00902	SRSGNTVTL	SRSGNTVTL	0	0	0	0	0	SRSGNTVTL	OmpA	0.217721	0.65	0.212286	1.912	5028.57	WB
276	BoLA-1:00902	QRAKIVADY	QRAKIVADY	0	0	0	0	0	QRAKIVADY	OmpA	0.191483	0.784	0.218356	1.748	4708.92	WB
48	BoLA-1:00902	GAFERPQSV	GAFERPQSV	0	0	0	0	0	GAFERPQSV	OmpA	0.176893	0.873	0.153827	4.61	9465.46	WB
175	BoLA-1:00902	VKRAATSTW	VKRAATSTW	0	0	0	0	0	VKRAATSTW	OmpA	0.132345	1.213	0.202681	2.202	5579.28	WB
117	BoLA-1:00902	GVNVIDQIH	GVNVIDQIH	0	0	0	0	0	GVNVIDQIH	OmpA	0.128335	1.264	0.176047	3.267	7442.7	WB
163	BoLA-1:00902	TGTAPSSEH	TGTAPSSEH	0	0	0	0	0	TGTAPSSEH	OmpA	0.124197	1.314	0.173043	3.416	7688.58	WB
217	BoLA-1:00902	AVTGGPIAF	AVTGGPIAF	0	0	0	0	0	AVTGGPIAF	OmpA	0.091065	1.816	0.158086	4.306	9039.17	WB
125	BoLA-1:00902	HVDPVVRSL	HVDPVVRSL	0	0	0	0	0	HVDPVVRSL	OmpA	0.090587	1.825	0.091027	13.95	18674	WB
155	BoLA-1:01901	VERDTVTLT	VERDTVTLT	0	0	0	0	0	VERDTVTLT	OmpA	0.703679	0.108	0.402111	0.496	644.86	SB
50	BoLA-1:01901	FERPQSVTG	FERPQSVTG	0	0	0	0	0	FERPQSVTG	OmpA	0.464184	0.332	0.3697	0.691	915.72	SB
99	BoLA-1:01901	DEAAKAALM	DEAAKAALM	0	0	0	0	0	DEAAKAALM	OmpA	0.434653	0.377	0.339002	0.961	1276.47	SB
138	BoLA-1:01901	AEPVFTASV	AEPVFTASV	0	0	0	0	0	AEPVFTASV	OmpA	0.289366	0.676	0.375714	0.655	858.03	WB
235	BoLA-1:01901	ADYEILNRV	ADYEILNRV	0	0	0	0	0	ADYEILNRV	OmpA	0.277727	0.706	0.260384	2.03	2988.36	WB
192	BoLA-1:01901	IEVTGQAPP	IEVTGQAPP	0	0	0	0	0	IEVTGQAPP	OmpA	0.145465	1.265	0.361543	0.757	1000.21	WB
196	BoLA-1:01901	GQAPPGPPA	GQAPPGPPA	0	0	0	0	0	GQAPPGPPA	OmpA	0.125132	1.422	0.206959	3.24	5326.92	WB
266	BoLA-1:01901	SEGINIPLS	SEGINIPLS	0	0	0	0	0	SEGINIPLS	OmpA	0.12145	1.454	0.296813	1.445	2014.91	WB
209	BoLA-1:01901	ADLQSAINA	ADLQSAINA	0	0	0	0	0	ADLQSAINA	OmpA	0.079247	1.958	0.196371	3.568	5973.49	WB
169	BoLA-1:02001	SEHKDAVKR	SEHKDAVKR	0	0	0	0	0	SEHKDAVKR	OmpA	0.435585	0.089	0.246298	1.147	3480.35	SB
99	BoLA-1:02001	DEAAKAALM	DEAAKAALM	0	0	0	0	0	DEAAKAALM	OmpA	0.347964	0.194	0.315149	0.375	1652.32	SB
155	BoLA-1:02001	VERDTVTLT	VERDTVTLT	0	0	0	0	0	VERDTVTLT	OmpA	0.203461	0.634	0.218933	1.674	4679.62	WB
235	BoLA-1:02001	ADYEILNRV	ADYEILNRV	0	0	0	0	0	ADYEILNRV	OmpA	0.1402	1.086	0.192131	2.449	6253.92	WB
138	BoLA-1:02001	AEPVFTASV	AEPVFTASV	0	0	0	0	0	AEPVFTASV	OmpA	0.124885	1.256	0.254192	1.013	3195.43	WB
50	BoLA-1:02001	FERPQSVTG	FERPQSVTG	0	0	0	0	0	FERPQSVTG	OmpA	0.112703	1.424	0.190618	2.495	6357.14	WB
266	BoLA-1:02001	SEGINIPLS	SEGINIPLS	0	0	0	0	0	SEGINIPLS	OmpA	0.106386	1.523	0.25104	1.066	3306.29	WB
14	BoLA-1:02001	TDARRTQKF	TDARRTQKF	0	0	0	0	0	TDARRTQKF	OmpA	0.091481	1.773	0.105598	8.866	15950.3	WB
196	BoLA-1:02101	GQAPPGPPA	GQAPPGPPA	0	0	0	0	0	GQAPPGPPA	OmpA	0.104047	0.078	0.143093	0.223	10631.1	SB
138	BoLA-1:02101	AEPVFTASV	AEPVFTASV	0	0	0	0	0	AEPVFTASV	OmpA	0.055131	0.21	0.135544	0.273	11535.9	SB
235	BoLA-1:02101	ADYEILNRV	ADYEILNRV	0	0	0	0	0	ADYEILNRV	OmpA	0.039837	0.32	0.070387	1.944	23346.6	SB
99	BoLA-1:02101	DEAAKAALM	DEAAKAALM	0	0	0	0	0	DEAAKAALM	OmpA	0.025919	0.53	0.079985	1.386	21043.7	WB
122	BoLA-1:02101	DQIHVDPVV	DQIHVDPVV	0	0	0	0	0	DQIHVDPVV	OmpA	0.024427	0.565	0.08846	1.018	19199.9	WB
155	BoLA-1:02101	VERDTVTLT	VERDTVTLT	0	0	0	0	0	VERDTVTLT	OmpA	0.023808	0.58	0.064912	2.412	24771.4	WB
48	BoLA-1:02101	GAFERPQSV	GAFERPQSV	0	0	0	0	0	GAFERPQSV	OmpA	0.023358	0.591	0.052673	4.045	28278.8	WB
8	BoLA-1:02101	GQTPATTDA	GQTPATTDA	0	0	0	0	0	GQTPATTDA	OmpA	0.0108	1.266	0.055589	3.53	27400.5	WB
85	BoLA-1:02101	SRSGNTVTL	SRSGNTVTL	0	0	0	0	0	SRSGNTVTL	OmpA	0.010166	1.337	0.057511	3.264	26836.6	WB
186	BoLA-1:02101	MKIVNNIEV	MKIVNNIEV	0	0	0	0	0	MKIVNNIEV	OmpA	0.009359	1.436	0.086166	1.096	19682.4	WB
50	BoLA-1:02101	FERPQSVTG	FERPQSVTG	0	0	0	0	0	FERPQSVTG	OmpA	0.009081	1.473	0.058717	3.102	26488.7	WB
136	BoLA-1:02101	SSAEPVFTA	SSAEPVFTA	0	0	0	0	0	SSAEPVFTA	OmpA	0.007389	1.767	0.050092	4.564	29079.7	WB
282	BoLA-1:02101	ADYLVARGV	ADYLVARGV	0	0	0	0	0	ADYLVARGV	OmpA	0.007234	1.799	0.065611	2.35	24584.8	WB
290	BoLA-1:02101	VAGDHIATV	VAGDHIATV	0	0	0	0	0	VAGDHIATV	OmpA	0.006638	1.93	0.029461	14.182	36352.4	WB
231	BoLA-1:02101	SLIPADYEI	SLIPADYEI	0	0	0	0	0	SLIPADYEI	OmpA	0.0066	1.939	0.068143	2.123	23920.4	WB
102	BoLA-1:02301	AKAALMTAL	AKAALMTAL	0	0	0	0	0	AKAALMTAL	OmpA	0.798459	0.069	0.523261	0.054	173.85	SB
175	BoLA-1:02301	VKRAATSTW	VKRAATSTW	0	0	0	0	0	VKRAATSTW	OmpA	0.560643	0.317	0.393779	0.317	705.69	SB
85	BoLA-1:02301	SRSGNTVTL	SRSGNTVTL	0	0	0	0	0	SRSGNTVTL	OmpA	0.504114	0.403	0.322758	0.744	1521.74	SB
196	BoLA-1:02301	GQAPPGPPA	GQAPPGPPA	0	0	0	0	0	GQAPPGPPA	OmpA	0.434201	0.55	0.362004	0.458	995.23	WB
48	BoLA-1:02301	GAFERPQSV	GAFERPQSV	0	0	0	0	0	GAFERPQSV	OmpA	0.404452	0.619	0.247328	1.921	3441.78	WB
276	BoLA-1:02301	QRAKIVADY	QRAKIVADY	0	0	0	0	0	QRAKIVADY	OmpA	0.260634	1.217	0.233799	2.273	3984.33	WB
316	BoLA-1:02301	AKNRRVEIV	AKNRRVEIV	0	0	0	0	0	AKNRRVEIV	OmpA	0.251644	1.277	0.242352	2.048	3632.16	WB
186	BoLA-1:02301	MKIVNNIEV	MKIVNNIEV	0	0	0	0	0	MKIVNNIEV	OmpA	0.238862	1.36	0.333553	0.655	1353.99	WB
71	BoLA-1:02301	TRGASALSL	TRGASALSL	0	0	0	0	0	TRGASALSL	OmpA	0.19558	1.726	0.224016	2.54	4429.2	WB
217	BoLA-1:02301	AVTGGPIAF	AVTGGPIAF	0	0	0	0	0	AVTGGPIAF	OmpA	0.184908	1.831	0.1906	3.904	6358.38	WB
125	BoLA-1:02301	HVDPVVRSL	HVDPVVRSL	0	0	0	0	0	HVDPVVRSL	OmpA	0.183532	1.846	0.126944	9.583	12660.9	WB
125	BoLA-1:02801	HVDPVVRSL	HVDPVVRSL	0	0	0	0	0	HVDPVVRSL	OmpA	0.218202	0.21	0.141653	3.539	10798.1	SB
196	BoLA-1:02801	GQAPPGPPA	GQAPPGPPA	0	0	0	0	0	GQAPPGPPA	OmpA	0.177871	0.287	0.250595	0.523	3322.25	SB
102	BoLA-1:02801	AKAALMTAL	AKAALMTAL	0	0	0	0	0	AKAALMTAL	OmpA	0.141207	0.411	0.215783	0.911	4841.86	SB
235	BoLA-1:02801	ADYEILNRV	ADYEILNRV	0	0	0	0	0	ADYEILNRV	OmpA	0.13598	0.436	0.191966	1.346	6265.09	SB
48	BoLA-1:02801	GAFERPQSV	GAFERPQSV	0	0	0	0	0	GAFERPQSV	OmpA	0.131993	0.454	0.152539	2.88	9598.29	SB
85	BoLA-1:02801	SRSGNTVTL	SRSGNTVTL	0	0	0	0	0	SRSGNTVTL	OmpA	0.126173	0.482	0.153508	2.832	9498.18	SB
231	BoLA-1:02801	SLIPADYEI	SLIPADYEI	0	0	0	0	0	SLIPADYEI	OmpA	0.092811	0.744	0.250175	0.527	3337.38	WB
138	BoLA-1:02801	AEPVFTASV	AEPVFTASV	0	0	0	0	0	AEPVFTASV	OmpA	0.071055	1.05	0.189777	1.409	6415.25	WB
55	BoLA-1:02801	SVTGPTGVL	SVTGPTGVL	0	0	0	0	0	SVTGPTGVL	OmpA	0.063702	1.19	0.178115	1.761	7278.01	WB
154	BoLA-1:02801	KVERDTVTL	KVERDTVTL	0	0	0	0	0	KVERDTVTL	OmpA	0.063102	1.203	0.126807	4.739	12679.7	WB
105	BoLA-1:02801	ALMTALNGL	ALMTALNGL	0	0	0	0	0	ALMTALNGL	OmpA	0.060773	1.252	0.241487	0.596	3666.31	WB
112	BoLA-1:02801	GLLAPGVNV	GLLAPGVNV	0	0	0	0	0	GLLAPGVNV	OmpA	0.052034	1.488	0.149406	3.043	9929.23	WB
277	BoLA-1:02801	RAKIVADYL	RAKIVADYL	0	0	0	0	0	RAKIVADYL	OmpA	0.047237	1.647	0.17973	1.706	7151.94	WB
73	BoLA-1:02801	GASALSLSL	GASALSLSL	0	0	0	0	0	GASALSLSL	OmpA	0.044853	1.742	0.178409	1.751	7254.9	WB
239	BoLA-1:02801	ILNRVADKL	ILNRVADKL	0	0	0	0	0	ILNRVADKL	OmpA	0.043761	1.79	0.171838	1.996	7789.48	WB
217	BoLA-1:02801	AVTGGPIAF	AVTGGPIAF	0	0	0	0	0	AVTGGPIAF	OmpA	0.041662	1.874	0.095092	8.949	17870.5	WB
74	BoLA-1:02801	ASALSLSLL	ASALSLSLL	0	0	0	0	0	ASALSLSLL	OmpA	0.041654	1.874	0.172229	1.978	7756.6	WB
113	BoLA-1:02801	LLAPGVNVI	LLAPGVNVI	0	0	0	0	0	LLAPGVNVI	OmpA	0.039811	1.954	0.187197	1.478	6596.86	WB
99	BoLA-1:02901	DEAAKAALM	DEAAKAALM	0	0	0	0	0	DEAAKAALM	OmpA	0.260706	0.259	0.222077	0.511	4523.11	SB
235	BoLA-1:02901	ADYEILNRV	ADYEILNRV	0	0	0	0	0	ADYEILNRV	OmpA	0.249975	0.285	0.203481	0.74	5531.19	SB
138	BoLA-1:02901	AEPVFTASV	AEPVFTASV	0	0	0	0	0	AEPVFTASV	OmpA	0.219169	0.378	0.254997	0.262	3167.72	SB
14	BoLA-1:02901	TDARRTQKF	TDARRTQKF	0	0	0	0	0	TDARRTQKF	OmpA	0.194802	0.492	0.127774	3.218	12547.7	SB
48	BoLA-1:02901	GAFERPQSV	GAFERPQSV	0	0	0	0	0	GAFERPQSV	OmpA	0.155938	0.712	0.110947	4.706	15053.4	WB
125	BoLA-1:02901	HVDPVVRSL	HVDPVVRSL	0	0	0	0	0	HVDPVVRSL	OmpA	0.140893	0.829	0.074465	11.858	22338.9	WB
122	BoLA-1:02901	DQIHVDPVV	DQIHVDPVV	0	0	0	0	0	DQIHVDPVV	OmpA	0.089166	1.542	0.133868	2.832	11747	WB
282	BoLA-1:02901	ADYLVARGV	ADYLVARGV	0	0	0	0	0	ADYLVARGV	OmpA	0.078378	1.799	0.182684	1.123	6926.97	WB
85	BoLA-1:02901	SRSGNTVTL	SRSGNTVTL	0	0	0	0	0	SRSGNTVTL	OmpA	0.076989	1.835	0.096378	6.647	17623.5	WB
276	BoLA-1:03101	QRAKIVADY	QRAKIVADY	0	0	0	0	0	QRAKIVADY	OmpA	0.288856	0.378	0.206577	1.318	5348.98	SB
125	BoLA-1:03101	HVDPVVRSL	HVDPVVRSL	0	0	0	0	0	HVDPVVRSL	OmpA	0.205785	0.764	0.096318	13.709	17635	WB
175	BoLA-1:03101	VKRAATSTW	VKRAATSTW	0	0	0	0	0	VKRAATSTW	OmpA	0.200315	0.805	0.218638	1.008	4694.58	WB
102	BoLA-1:03101	AKAALMTAL	AKAALMTAL	0	0	0	0	0	AKAALMTAL	OmpA	0.176347	1.005	0.191457	1.792	6299.69	WB
85	BoLA-1:03101	SRSGNTVTL	SRSGNTVTL	0	0	0	0	0	SRSGNTVTL	OmpA	0.17276	1.043	0.128603	6.735	12435.6	WB
217	BoLA-1:03101	AVTGGPIAF	AVTGGPIAF	0	0	0	0	0	AVTGGPIAF	OmpA	0.143646	1.372	0.115319	9.006	14357.9	WB
23	BoLA-1:03101	YRGSPGRPW	YRGSPGRPW	0	0	0	0	0	YRGSPGRPW	OmpA	0.135967	1.49	0.169657	2.817	7975.48	WB
48	BoLA-1:03101	GAFERPQSV	GAFERPQSV	0	0	0	0	0	GAFERPQSV	OmpA	0.130248	1.582	0.113137	9.434	14700.9	WB
169	BoLA-1:03101	SEHKDAVKR	SEHKDAVKR	0	0	0	0	0	SEHKDAVKR	OmpA	0.124355	1.681	0.100423	12.502	16868.8	WB
196	BoLA-1:03101	GQAPPGPPA	GQAPPGPPA	0	0	0	0	0	GQAPPGPPA	OmpA	0.116824	1.815	0.146072	4.666	10294	WB
276	BoLA-1:03102	QRAKIVADY	QRAKIVADY	0	0	0	0	0	QRAKIVADY	OmpA	0.237403	0.28	0.212192	1.58	5033.69	SB
85	BoLA-1:03102	SRSGNTVTL	SRSGNTVTL	0	0	0	0	0	SRSGNTVTL	OmpA	0.176439	0.532	0.156166	5.288	9228.91	WB
102	BoLA-1:03102	AKAALMTAL	AKAALMTAL	0	0	0	0	0	AKAALMTAL	OmpA	0.15653	0.662	0.225544	1.165	4356.58	WB
125	BoLA-1:03102	HVDPVVRSL	HVDPVVRSL	0	0	0	0	0	HVDPVVRSL	OmpA	0.149894	0.716	0.103606	16.734	16297.8	WB
169	BoLA-1:03102	SEHKDAVKR	SEHKDAVKR	0	0	0	0	0	SEHKDAVKR	OmpA	0.131678	0.896	0.133756	8.615	11761.3	WB
16	BoLA-1:03102	ARRTQKFYR	ARRTQKFYR	0	0	0	0	0	ARRTQKFYR	OmpA	0.108942	1.218	0.190497	2.498	6365.47	WB
175	BoLA-1:03102	VKRAATSTW	VKRAATSTW	0	0	0	0	0	VKRAATSTW	OmpA	0.107775	1.24	0.198553	2.107	5834.12	WB
196	BoLA-1:03102	GQAPPGPPA	GQAPPGPPA	0	0	0	0	0	GQAPPGPPA	OmpA	0.103858	1.316	0.182767	2.978	6920.75	WB
48	BoLA-1:03102	GAFERPQSV	GAFERPQSV	0	0	0	0	0	GAFERPQSV	OmpA	0.087728	1.676	0.116451	12.563	14183.1	WB
23	BoLA-1:03102	YRGSPGRPW	YRGSPGRPW	0	0	0	0	0	YRGSPGRPW	OmpA	0.078858	1.935	0.160511	4.827	8805.08	WB
21	BoLA-1:03102	KFYRGSPGR	KFYRGSPGR	0	0	0	0	0	KFYRGSPGR	OmpA	0.07842	1.949	0.172228	3.764	7756.68	WB
169	BoLA-1:04201	SEHKDAVKR	SEHKDAVKR	0	0	0	0	0	SEHKDAVKR	OmpA	0.432796	0.078	0.231927	0.723	4065.85	SB
276	BoLA-1:04201	QRAKIVADY	QRAKIVADY	0	0	0	0	0	QRAKIVADY	OmpA	0.16854	0.714	0.189388	1.7	6442.31	WB
155	BoLA-1:04201	VERDTVTLT	VERDTVTLT	0	0	0	0	0	VERDTVTLT	OmpA	0.114841	1.236	0.157598	3.14	9087.02	WB
85	BoLA-1:04201	SRSGNTVTL	SRSGNTVTL	0	0	0	0	0	SRSGNTVTL	OmpA	0.107407	1.354	0.113886	7.904	14582.2	WB
235	BoLA-1:04201	ADYEILNRV	ADYEILNRV	0	0	0	0	0	ADYEILNRV	OmpA	0.10471	1.399	0.143683	4.185	10563.5	WB
99	BoLA-1:04201	DEAAKAALM	DEAAKAALM	0	0	0	0	0	DEAAKAALM	OmpA	0.09677	1.54	0.161851	2.882	8678.35	WB
14	BoLA-1:04201	TDARRTQKF	TDARRTQKF	0	0	0	0	0	TDARRTQKF	OmpA	0.084089	1.829	0.097355	11.456	17438.2	WB
138	BoLA-1:04201	AEPVFTASV	AEPVFTASV	0	0	0	0	0	AEPVFTASV	OmpA	0.082066	1.893	0.163136	2.811	8558.52	WB
102	BoLA-1:04901	AKAALMTAL	AKAALMTAL	0	0	0	0	0	AKAALMTAL	OmpA	0.465371	0.124	0.373473	0.087	879.09	SB
175	BoLA-1:04901	VKRAATSTW	VKRAATSTW	0	0	0	0	0	VKRAATSTW	OmpA	0.414671	0.201	0.327052	0.225	1452.66	SB
85	BoLA-1:04901	SRSGNTVTL	SRSGNTVTL	0	0	0	0	0	SRSGNTVTL	OmpA	0.385963	0.257	0.254957	0.857	3169.09	SB
316	BoLA-1:04901	AKNRRVEIV	AKNRRVEIV	0	0	0	0	0	AKNRRVEIV	OmpA	0.35465	0.33	0.257116	0.821	3095.92	SB
186	BoLA-1:04901	MKIVNNIEV	MKIVNNIEV	0	0	0	0	0	MKIVNNIEV	OmpA	0.246824	0.725	0.319266	0.263	1580.33	WB
48	BoLA-1:04901	GAFERPQSV	GAFERPQSV	0	0	0	0	0	GAFERPQSV	OmpA	0.207808	0.981	0.173087	3.478	7684.92	WB
71	BoLA-1:04901	TRGASALSL	TRGASALSL	0	0	0	0	0	TRGASALSL	OmpA	0.179091	1.225	0.213153	1.763	4981.62	WB
23	BoLA-1:04901	YRGSPGRPW	YRGSPGRPW	0	0	0	0	0	YRGSPGRPW	OmpA	0.16516	1.375	0.203984	2.063	5501.17	WB
125	BoLA-1:04901	HVDPVVRSL	HVDPVVRSL	0	0	0	0	0	HVDPVVRSL	OmpA	0.155126	1.501	0.122738	8.522	13250.4	WB
278	BoLA-1:04901	AKIVADYLV	AKIVADYLV	0	0	0	0	0	AKIVADYLV	OmpA	0.144645	1.646	0.259477	0.784	3017.83	WB
196	BoLA-1:06101	GQAPPGPPA	GQAPPGPPA	0	0	0	0	0	GQAPPGPPA	OmpA	0.623853	0.012	0.449874	0.026	384.61	SB
125	BoLA-1:06101	HVDPVVRSL	HVDPVVRSL	0	0	0	0	0	HVDPVVRSL	OmpA	0.507581	0.042	0.230157	1.65	4144.47	SB
48	BoLA-1:06101	GAFERPQSV	GAFERPQSV	0	0	0	0	0	GAFERPQSV	OmpA	0.50599	0.043	0.280124	0.68	2413.66	SB
231	BoLA-1:06101	SLIPADYEI	SLIPADYEI	0	0	0	0	0	SLIPADYEI	OmpA	0.342426	0.178	0.363941	0.138	974.59	SB
136	BoLA-1:06101	SSAEPVFTA	SSAEPVFTA	0	0	0	0	0	SSAEPVFTA	OmpA	0.288304	0.287	0.247214	1.203	3446.03	SB
113	BoLA-1:06101	LLAPGVNVI	LLAPGVNVI	0	0	0	0	0	LLAPGVNVI	OmpA	0.288082	0.287	0.319319	0.335	1579.43	SB
55	BoLA-1:06101	SVTGPTGVL	SVTGPTGVL	0	0	0	0	0	SVTGPTGVL	OmpA	0.240531	0.45	0.28405	0.631	2313.28	SB
290	BoLA-1:06101	VAGDHIATV	VAGDHIATV	0	0	0	0	0	VAGDHIATV	OmpA	0.23137	0.493	0.223989	1.849	4430.5	SB
112	BoLA-1:06101	GLLAPGVNV	GLLAPGVNV	0	0	0	0	0	GLLAPGVNV	OmpA	0.222062	0.542	0.250589	1.135	3322.46	WB
73	BoLA-1:06101	GASALSLSL	GASALSLSL	0	0	0	0	0	GASALSLSL	OmpA	0.213725	0.586	0.275831	0.735	2528.42	WB
154	BoLA-1:06101	KVERDTVTL	KVERDTVTL	0	0	0	0	0	KVERDTVTL	OmpA	0.207799	0.622	0.190578	3.4	6359.89	WB
83	BoLA-1:06101	SISRSGNTV	SISRSGNTV	0	0	0	0	0	SISRSGNTV	OmpA	0.207287	0.626	0.266059	0.864	2810.39	WB
105	BoLA-1:06101	ALMTALNGL	ALMTALNGL	0	0	0	0	0	ALMTALNGL	OmpA	0.194362	0.717	0.331951	0.261	1377.66	WB
101	BoLA-1:06101	AAKAALMTA	AAKAALMTA	0	0	0	0	0	AAKAALMTA	OmpA	0.186547	0.778	0.210282	2.382	5138.8	WB
302	BoLA-1:06101	SVNPIASNA	SVNPIASNA	0	0	0	0	0	SVNPIASNA	OmpA	0.181877	0.816	0.195039	3.13	6060.21	WB
122	BoLA-1:06101	DQIHVDPVV	DQIHVDPVV	0	0	0	0	0	DQIHVDPVV	OmpA	0.163544	0.983	0.224253	1.84	4417.86	WB
8	BoLA-1:06101	GQTPATTDA	GQTPATTDA	0	0	0	0	0	GQTPATTDA	OmpA	0.157001	1.054	0.22595	1.786	4337.48	WB
274	BoLA-1:06101	SAQRAKIVA	SAQRAKIVA	0	0	0	0	0	SAQRAKIVA	OmpA	0.144942	1.206	0.193233	3.24	6179.79	WB
239	BoLA-1:06101	ILNRVADKL	ILNRVADKL	0	0	0	0	0	ILNRVADKL	OmpA	0.131497	1.408	0.208943	2.439	5213.78	WB
76	BoLA-1:06101	ALSLSLLSI	ALSLSLLSI	0	0	0	0	0	ALSLSLLSI	OmpA	0.13035	1.428	0.236541	1.472	3867.86	WB
217	BoLA-1:06101	AVTGGPIAF	AVTGGPIAF	0	0	0	0	0	AVTGGPIAF	OmpA	0.125959	1.505	0.15601	6.295	9244.5	WB
242	BoLA-1:06101	RVADKLKAC	RVADKLKAC	0	0	0	0	0	RVADKLKAC	OmpA	0.118781	1.633	0.138718	8.523	11146.5	WB
152	BoLA-1:06101	GLKVERDTV	GLKVERDTV	0	0	0	0	0	GLKVERDTV	OmpA	0.110958	1.8	0.165645	5.296	8329.31	WB
235	BoLA-1:06101	ADYEILNRV	ADYEILNRV	0	0	0	0	0	ADYEILNRV	OmpA	0.106875	1.905	0.143208	7.871	10617.9	WB
74	BoLA-1:06101	ASALSLSLL	ASALSLSLL	0	0	0	0	0	ASALSLSLL	OmpA	0.103561	1.985	0.22941	1.673	4178.1	WB
125	BoLA-1:06701	HVDPVVRSL	HVDPVVRSL	0	0	0	0	0	HVDPVVRSL	OmpA	0.80503	0.006	0.420948	0.137	525.95	SB
154	BoLA-1:06701	KVERDTVTL	KVERDTVTL	0	0	0	0	0	KVERDTVTL	OmpA	0.481234	0.162	0.338741	0.67	1280.08	SB
231	BoLA-1:06701	SLIPADYEI	SLIPADYEI	0	0	0	0	0	SLIPADYEI	OmpA	0.478814	0.166	0.456059	0.069	359.72	SB
136	BoLA-1:06701	SSAEPVFTA	SSAEPVFTA	0	0	0	0	0	SSAEPVFTA	OmpA	0.409677	0.29	0.361777	0.458	997.68	SB
48	BoLA-1:06701	GAFERPQSV	GAFERPQSV	0	0	0	0	0	GAFERPQSV	OmpA	0.375094	0.39	0.251066	2.652	3305.36	SB
73	BoLA-1:06701	GASALSLSL	GASALSLSL	0	0	0	0	0	GASALSLSL	OmpA	0.338471	0.517	0.349407	0.568	1140.56	WB
74	BoLA-1:06701	ASALSLSLL	ASALSLSLL	0	0	0	0	0	ASALSLSLL	OmpA	0.332905	0.539	0.384818	0.297	777.54	WB
55	BoLA-1:06701	SVTGPTGVL	SVTGPTGVL	0	0	0	0	0	SVTGPTGVL	OmpA	0.316769	0.604	0.299593	1.24	1955.2	WB
290	BoLA-1:06701	VAGDHIATV	VAGDHIATV	0	0	0	0	0	VAGDHIATV	OmpA	0.315333	0.612	0.26655	2.078	2795.5	WB
145	BoLA-1:06701	SVPIPDFGL	SVPIPDFGL	0	0	0	0	0	SVPIPDFGL	OmpA	0.31035	0.639	0.28784	1.482	2220.33	WB
265	BoLA-1:06701	GSEGINIPL	GSEGINIPL	0	0	0	0	0	GSEGINIPL	OmpA	0.281259	0.807	0.355128	0.516	1072.1	WB
277	BoLA-1:06701	RAKIVADYL	RAKIVADYL	0	0	0	0	0	RAKIVADYL	OmpA	0.278763	0.826	0.317864	0.935	1604.49	WB
33	BoLA-1:06701	IGAVVIPLL	IGAVVIPLL	0	0	0	0	0	IGAVVIPLL	OmpA	0.274826	0.857	0.331719	0.753	1381.12	WB
239	BoLA-1:06701	ILNRVADKL	ILNRVADKL	0	0	0	0	0	ILNRVADKL	OmpA	0.267624	0.912	0.274087	1.824	2576.58	WB
113	BoLA-1:06701	LLAPGVNVI	LLAPGVNVI	0	0	0	0	0	LLAPGVNVI	OmpA	0.262047	0.955	0.308435	1.08	1776.82	WB
69	BoLA-1:06701	TSTRGASAL	TSTRGASAL	0	0	0	0	0	TSTRGASAL	OmpA	0.253563	1.027	0.338193	0.676	1287.69	WB
225	BoLA-1:06701	FGNDGASLI	FGNDGASLI	0	0	0	0	0	FGNDGASLI	OmpA	0.236239	1.194	0.34528	0.607	1192.64	WB
217	BoLA-1:06701	AVTGGPIAF	AVTGGPIAF	0	0	0	0	0	AVTGGPIAF	OmpA	0.230258	1.25	0.1856	7.181	6711.83	WB
25	BoLA-1:06701	GSPGRPWLI	GSPGRPWLI	0	0	0	0	0	GSPGRPWLI	OmpA	0.217967	1.37	0.260859	2.281	2973.04	WB
86	BoLA-1:06701	RSGNTVTLI	RSGNTVTLI	0	0	0	0	0	RSGNTVTLI	OmpA	0.21376	1.419	0.353097	0.534	1095.92	WB
180	BoLA-1:06701	TSTWPDMKI	TSTWPDMKI	0	0	0	0	0	TSTWPDMKI	OmpA	0.201388	1.595	0.295193	1.328	2050.53	WB
58	BoLA-1:06701	GPTGVLPTL	GPTGVLPTL	0	0	0	0	0	GPTGVLPTL	OmpA	0.201347	1.596	0.194776	6.281	6077.48	WB
54	BoLA-1:06701	QSVTGPTGV	QSVTGPTGV	0	0	0	0	0	QSVTGPTGV	OmpA	0.179561	1.934	0.239289	3.16	3754.55	WB
83	BoLA-1:06701	SISRSGNTV	SISRSGNTV	0	0	0	0	0	SISRSGNTV	OmpA	0.178837	1.945	0.252008	2.613	3271.84	WB
181	BoLA-1:06701	STWPDMKIV	STWPDMKIV	0	0	0	0	0	STWPDMKIV	OmpA	0.1777	1.963	0.229881	3.636	4156.87	WB
249	BoLA-1:06701	ACPDARVTI	ACPDARVTI	0	0	0	0	0	ACPDARVTI	OmpA	0.177164	1.972	0.173843	8.586	7622.31	WB
143	BoLA-1:06701	TASVPIPDF	TASVPIPDF	0	0	0	0	0	TASVPIPDF	OmpA	0.176028	1.99	0.172499	8.761	7733.97	WB
138	BoLA-1:07401	AEPVFTASV	AEPVFTASV	0	0	0	0	0	AEPVFTASV	OmpA	0.134605	0.378	0.207939	0.277	5270.73	SB
235	BoLA-1:07401	ADYEILNRV	ADYEILNRV	0	0	0	0	0	ADYEILNRV	OmpA	0.129864	0.395	0.14653	1.022	10243.1	SB
99	BoLA-1:07401	DEAAKAALM	DEAAKAALM	0	0	0	0	0	DEAAKAALM	OmpA	0.123447	0.426	0.154759	0.857	9370.49	SB
125	BoLA-1:07401	HVDPVVRSL	HVDPVVRSL	0	0	0	0	0	HVDPVVRSL	OmpA	0.100064	0.581	0.070565	6.87	23301.7	WB
14	BoLA-1:07401	TDARRTQKF	TDARRTQKF	0	0	0	0	0	TDARRTQKF	OmpA	0.095181	0.625	0.084434	4.578	20054.7	WB
48	BoLA-1:07401	GAFERPQSV	GAFERPQSV	0	0	0	0	0	GAFERPQSV	OmpA	0.070705	0.934	0.066054	7.898	24467.2	WB
85	BoLA-1:07401	SRSGNTVTL	SRSGNTVTL	0	0	0	0	0	SRSGNTVTL	OmpA	0.043611	1.603	0.074516	6.107	22326.5	WB
58	BoLA-1:07401	GPTGVLPTL	GPTGVLPTL	0	0	0	0	0	GPTGVLPTL	OmpA	0.03965	1.758	0.067766	7.48	24018.2	WB
231	BoLA-1:07401	SLIPADYEI	SLIPADYEI	0	0	0	0	0	SLIPADYEI	OmpA	0.038384	1.812	0.141451	1.144	10821.7	WB
48	BoLA-2:00501	GAFERPQSV	GAFERPQSV	0	0	0	0	0	GAFERPQSV	OmpA	0.508611	0.036	0.263219	0.219	2898.09	SB
58	BoLA-2:00501	GPTGVLPTL	GPTGVLPTL	0	0	0	0	0	GPTGVLPTL	OmpA	0.440658	0.061	0.20921	0.822	5198.75	SB
125	BoLA-2:00501	HVDPVVRSL	HVDPVVRSL	0	0	0	0	0	HVDPVVRSL	OmpA	0.390422	0.088	0.147043	3.442	10186.4	SB
290	BoLA-2:00501	VAGDHIATV	VAGDHIATV	0	0	0	0	0	VAGDHIATV	OmpA	0.260585	0.326	0.215999	0.707	4830.56	SB
29	BoLA-2:00501	RPWLIGAVV	RPWLIGAVV	0	0	0	0	0	RPWLIGAVV	OmpA	0.241917	0.386	0.268451	0.193	2738.59	SB
136	BoLA-2:00501	SSAEPVFTA	SSAEPVFTA	0	0	0	0	0	SSAEPVFTA	OmpA	0.235893	0.408	0.198751	1.052	5821.64	SB
231	BoLA-2:00501	SLIPADYEI	SLIPADYEI	0	0	0	0	0	SLIPADYEI	OmpA	0.203355	0.583	0.235685	0.431	3903.85	WB
277	BoLA-2:00501	RAKIVADYL	RAKIVADYL	0	0	0	0	0	RAKIVADYL	OmpA	0.194054	0.656	0.226992	0.533	4288.85	WB
302	BoLA-2:00501	SVNPIASNA	SVNPIASNA	0	0	0	0	0	SVNPIASNA	OmpA	0.188808	0.699	0.174042	1.816	7605.92	WB
315	BoLA-2:00501	RAKNRRVEI	RAKNRRVEI	0	0	0	0	0	RAKNRRVEI	OmpA	0.184244	0.743	0.163968	2.319	8481.83	WB
73	BoLA-2:00501	GASALSLSL	GASALSLSL	0	0	0	0	0	GASALSLSL	OmpA	0.182798	0.757	0.188877	1.322	6478.03	WB
85	BoLA-2:00501	SRSGNTVTL	SRSGNTVTL	0	0	0	0	0	SRSGNTVTL	OmpA	0.14464	1.25	0.132525	4.822	11919	WB
97	BoLA-2:00501	FPDEAAKAA	FPDEAAKAA	0	0	0	0	0	FPDEAAKAA	OmpA	0.131636	1.492	0.131506	4.934	12051.1	WB
33	BoLA-2:00501	IGAVVIPLL	IGAVVIPLL	0	0	0	0	0	IGAVVIPLL	OmpA	0.128138	1.555	0.170587	1.971	7895.63	WB
113	BoLA-2:00501	LLAPGVNVI	LLAPGVNVI	0	0	0	0	0	LLAPGVNVI	OmpA	0.124311	1.629	0.174212	1.809	7591.95	WB
36	BoLA-2:00501	VVIPLLIAA	VVIPLLIAA	0	0	0	0	0	VVIPLLIAA	OmpA	0.122926	1.659	0.153063	2.994	9544.02	WB
105	BoLA-2:00501	ALMTALNGL	ALMTALNGL	0	0	0	0	0	ALMTALNGL	OmpA	0.116839	1.809	0.200834	1.002	5691.9	WB
55	BoLA-2:00501	SVTGPTGVL	SVTGPTGVL	0	0	0	0	0	SVTGPTGVL	OmpA	0.113387	1.89	0.137455	4.296	11299.9	WB
125	BoLA-2:00601	HVDPVVRSL	HVDPVVRSL	0	0	0	0	0	HVDPVVRSL	OmpA	0.200274	0.128	0.095391	2.803	17812.7	SB
48	BoLA-2:00601	GAFERPQSV	GAFERPQSV	0	0	0	0	0	GAFERPQSV	OmpA	0.176364	0.203	0.116483	1.176	14178.2	SB
138	BoLA-2:00601	AEPVFTASV	AEPVFTASV	0	0	0	0	0	AEPVFTASV	OmpA	0.13838	0.385	0.148669	0.341	10008.7	SB
85	BoLA-2:00601	SRSGNTVTL	SRSGNTVTL	0	0	0	0	0	SRSGNTVTL	OmpA	0.112678	0.585	0.121596	0.964	13415.1	WB
315	BoLA-2:00601	RAKNRRVEI	RAKNRRVEI	0	0	0	0	0	RAKNRRVEI	OmpA	0.097994	0.761	0.124128	0.883	13052.6	WB
58	BoLA-2:00601	GPTGVLPTL	GPTGVLPTL	0	0	0	0	0	GPTGVLPTL	OmpA	0.089242	0.898	0.08861	3.769	19168.8	WB
196	BoLA-2:00601	GQAPPGPPA	GQAPPGPPA	0	0	0	0	0	GQAPPGPPA	OmpA	0.079855	1.092	0.104352	1.92	16166.8	WB
235	BoLA-2:00601	ADYEILNRV	ADYEILNRV	0	0	0	0	0	ADYEILNRV	OmpA	0.077921	1.148	0.076169	6.25	21930.8	WB
198	BoLA-2:00601	APPGPPASG	APPGPPASG	0	0	0	0	0	APPGPPASG	OmpA	0.068802	1.402	0.067621	8.892	24055.9	WB
102	BoLA-2:00601	AKAALMTAL	AKAALMTAL	0	0	0	0	0	AKAALMTAL	OmpA	0.06765	1.44	0.127375	0.789	12602	WB
99	BoLA-2:00601	DEAAKAALM	DEAAKAALM	0	0	0	0	0	DEAAKAALM	OmpA	0.065023	1.536	0.089522	3.621	18980.5	WB
97	BoLA-2:00601	FPDEAAKAA	FPDEAAKAA	0	0	0	0	0	FPDEAAKAA	OmpA	0.0632	1.618	0.08705	4.022	19495.1	WB
48	BoLA-2:00602	GAFERPQSV	GAFERPQSV	0	0	0	0	0	GAFERPQSV	OmpA	0.245624	0.128	0.139442	0.951	11059.5	SB
138	BoLA-2:00602	AEPVFTASV	AEPVFTASV	0	0	0	0	0	AEPVFTASV	OmpA	0.171772	0.379	0.17751	0.247	7325.81	SB
125	BoLA-2:00602	HVDPVVRSL	HVDPVVRSL	0	0	0	0	0	HVDPVVRSL	OmpA	0.166375	0.406	0.092162	5.242	18446	SB
85	BoLA-2:00602	SRSGNTVTL	SRSGNTVTL	0	0	0	0	0	SRSGNTVTL	OmpA	0.151236	0.496	0.141088	0.898	10864.3	SB
315	BoLA-2:00602	RAKNRRVEI	RAKNRRVEI	0	0	0	0	0	RAKNRRVEI	OmpA	0.113005	0.85	0.130165	1.283	12227.2	WB
99	BoLA-2:00602	DEAAKAALM	DEAAKAALM	0	0	0	0	0	DEAAKAALM	OmpA	0.109518	0.894	0.125292	1.538	12889.2	WB
58	BoLA-2:00602	GPTGVLPTL	GPTGVLPTL	0	0	0	0	0	GPTGVLPTL	OmpA	0.10518	0.971	0.09649	4.502	17602.2	WB
102	BoLA-2:00602	AKAALMTAL	AKAALMTAL	0	0	0	0	0	AKAALMTAL	OmpA	0.101895	1.033	0.153418	0.588	9507.44	WB
14	BoLA-2:00602	TDARRTQKF	TDARRTQKF	0	0	0	0	0	TDARRTQKF	OmpA	0.078397	1.605	0.083041	7.236	20359.3	WB
127	BoLA-2:00602	DPVVRSLDF	DPVVRSLDF	0	0	0	0	0	DPVVRSLDF	OmpA	0.077493	1.634	0.108215	2.848	15505	WB
235	BoLA-2:00602	ADYEILNRV	ADYEILNRV	0	0	0	0	0	ADYEILNRV	OmpA	0.076935	1.653	0.087149	6.271	19474.2	WB
217	BoLA-2:00801	AVTGGPIAF	AVTGGPIAF	0	0	0	0	0	AVTGGPIAF	OmpA	0.257224	0.542	0.238548	1.732	3784.78	WB
175	BoLA-2:00801	VKRAATSTW	VKRAATSTW	0	0	0	0	0	VKRAATSTW	OmpA	0.22763	0.6	0.343145	0.78	1220.51	WB
125	BoLA-2:00801	HVDPVVRSL	HVDPVVRSL	0	0	0	0	0	HVDPVVRSL	OmpA	0.154574	0.878	0.101577	7.943	16659.5	WB
48	BoLA-2:00801	GAFERPQSV	GAFERPQSV	0	0	0	0	0	GAFERPQSV	OmpA	0.064795	1.702	0.137513	4.773	11292.8	WB
23	BoLA-2:00801	YRGSPGRPW	YRGSPGRPW	0	0	0	0	0	YRGSPGRPW	OmpA	0.052095	1.983	0.185329	2.761	6731.54	WB
175	BoLA-2:00802	VKRAATSTW	VKRAATSTW	0	0	0	0	0	VKRAATSTW	OmpA	0.142156	0.637	0.210589	0.816	5121.75	WB
125	BoLA-2:00802	HVDPVVRSL	HVDPVVRSL	0	0	0	0	0	HVDPVVRSL	OmpA	0.141869	0.639	0.069138	7.645	23664.2	WB
217	BoLA-2:00802	AVTGGPIAF	AVTGGPIAF	0	0	0	0	0	AVTGGPIAF	OmpA	0.133355	0.689	0.12027	2.681	13609	WB
15	BoLA-2:00802	DARRTQKFY	DARRTQKFY	0	0	0	0	0	DARRTQKFY	OmpA	0.058915	1.524	0.089616	4.72	18961.3	WB
23	BoLA-2:00802	YRGSPGRPW	YRGSPGRPW	0	0	0	0	0	YRGSPGRPW	OmpA	0.05489	1.616	0.119241	2.727	13761.3	WB
48	BoLA-2:00802	GAFERPQSV	GAFERPQSV	0	0	0	0	0	GAFERPQSV	OmpA	0.047612	1.81	0.083671	5.379	20221	WB
164	BoLA-2:01201	GTAPSSEHK	GTAPSSEHK	0	0	0	0	0	GTAPSSEHK	OmpA	0.699943	0.227	0.275613	0.641	2534.39	SB
179	BoLA-2:01201	ATSTWPDMK	ATSTWPDMK	0	0	0	0	0	ATSTWPDMK	OmpA	0.582184	0.423	0.265118	0.742	2839.15	SB
13	BoLA-2:01201	TTDARRTQK	TTDARRTQK	0	0	0	0	0	TTDARRTQK	OmpA	0.527768	0.539	0.225761	1.214	4346.36	WB
280	BoLA-2:01201	IVADYLVAR	IVADYLVAR	0	0	0	0	0	IVADYLVAR	OmpA	0.338086	1.195	0.175952	2.23	7450.35	WB
269	BoLA-2:01201	INIPLSAQR	INIPLSAQR	0	0	0	0	0	INIPLSAQR	OmpA	0.31963	1.273	0.175803	2.234	7462.37	WB
307	BoLA-2:01201	ASNATPEGR	ASNATPEGR	0	0	0	0	0	ASNATPEGR	OmpA	0.31355	1.299	0.156391	2.832	9206.47	WB
131	BoLA-2:01201	RSLDFSSAE	RSLDFSSAE	0	0	0	0	0	RSLDFSSAE	OmpA	0.230924	1.84	0.183284	2.042	6882.15	WB
168	BoLA-2:01201	SSEHKDAVK	SSEHKDAVK	0	0	0	0	0	SSEHKDAVK	OmpA	0.218387	1.936	0.166752	2.465	8230.14	WB
138	BoLA-2:01601	AEPVFTASV	AEPVFTASV	0	0	0	0	0	AEPVFTASV	OmpA	0.161056	0.245	0.162041	0.056	8660.52	SB
99	BoLA-2:01601	DEAAKAALM	DEAAKAALM	0	0	0	0	0	DEAAKAALM	OmpA	0.088589	0.69	0.105592	0.679	15951.3	WB
48	BoLA-2:01601	GAFERPQSV	GAFERPQSV	0	0	0	0	0	GAFERPQSV	OmpA	0.078124	0.843	0.075801	2.373	22018.3	WB
125	BoLA-2:01601	HVDPVVRSL	HVDPVVRSL	0	0	0	0	0	HVDPVVRSL	OmpA	0.076268	0.871	0.05604	6.52	27267.2	WB
235	BoLA-2:01601	ADYEILNRV	ADYEILNRV	0	0	0	0	0	ADYEILNRV	OmpA	0.065755	1.072	0.065196	3.987	24695.4	WB
196	BoLA-2:01601	GQAPPGPPA	GQAPPGPPA	0	0	0	0	0	GQAPPGPPA	OmpA	0.057855	1.271	0.082782	1.716	20416.4	WB
85	BoLA-2:01601	SRSGNTVTL	SRSGNTVTL	0	0	0	0	0	SRSGNTVTL	OmpA	0.04374	1.78	0.078002	2.137	21500.1	WB
125	BoLA-2:01602	HVDPVVRSL	HVDPVVRSL	0	0	0	0	0	HVDPVVRSL	OmpA	0.200274	0.128	0.095391	2.803	17812.7	SB
48	BoLA-2:01602	GAFERPQSV	GAFERPQSV	0	0	0	0	0	GAFERPQSV	OmpA	0.176364	0.203	0.116483	1.176	14178.2	SB
138	BoLA-2:01602	AEPVFTASV	AEPVFTASV	0	0	0	0	0	AEPVFTASV	OmpA	0.13838	0.385	0.148669	0.341	10008.7	SB
85	BoLA-2:01602	SRSGNTVTL	SRSGNTVTL	0	0	0	0	0	SRSGNTVTL	OmpA	0.112678	0.585	0.121596	0.964	13415.1	WB
315	BoLA-2:01602	RAKNRRVEI	RAKNRRVEI	0	0	0	0	0	RAKNRRVEI	OmpA	0.097994	0.761	0.124128	0.883	13052.6	WB
58	BoLA-2:01602	GPTGVLPTL	GPTGVLPTL	0	0	0	0	0	GPTGVLPTL	OmpA	0.089242	0.898	0.08861	3.769	19168.8	WB
196	BoLA-2:01602	GQAPPGPPA	GQAPPGPPA	0	0	0	0	0	GQAPPGPPA	OmpA	0.079855	1.092	0.104352	1.92	16166.8	WB
235	BoLA-2:01602	ADYEILNRV	ADYEILNRV	0	0	0	0	0	ADYEILNRV	OmpA	0.077921	1.148	0.076169	6.25	21930.8	WB
198	BoLA-2:01602	APPGPPASG	APPGPPASG	0	0	0	0	0	APPGPPASG	OmpA	0.068802	1.402	0.067621	8.892	24055.9	WB
102	BoLA-2:01602	AKAALMTAL	AKAALMTAL	0	0	0	0	0	AKAALMTAL	OmpA	0.06765	1.44	0.127375	0.789	12602	WB
99	BoLA-2:01602	DEAAKAALM	DEAAKAALM	0	0	0	0	0	DEAAKAALM	OmpA	0.065023	1.536	0.089522	3.621	18980.5	WB
97	BoLA-2:01602	FPDEAAKAA	FPDEAAKAA	0	0	0	0	0	FPDEAAKAA	OmpA	0.0632	1.618	0.08705	4.022	19495.1	WB
58	BoLA-2:01801	GPTGVLPTL	GPTGVLPTL	0	0	0	0	0	GPTGVLPTL	OmpA	0.784291	0.111	0.239447	0.472	3748.14	SB
48	BoLA-2:01801	GAFERPQSV	GAFERPQSV	0	0	0	0	0	GAFERPQSV	OmpA	0.433918	0.507	0.125295	2.161	12888.8	WB
127	BoLA-2:01801	DPVVRSLDF	DPVVRSLDF	0	0	0	0	0	DPVVRSLDF	OmpA	0.4305	0.514	0.201313	0.739	5662.47	WB
125	BoLA-2:01801	HVDPVVRSL	HVDPVVRSL	0	0	0	0	0	HVDPVVRSL	OmpA	0.405492	0.564	0.102893	3.202	16424	WB
97	BoLA-2:01801	FPDEAAKAA	FPDEAAKAA	0	0	0	0	0	FPDEAAKAA	OmpA	0.375061	0.625	0.170414	1.093	7910.43	WB
29	BoLA-2:01801	RPWLIGAVV	RPWLIGAVV	0	0	0	0	0	RPWLIGAVV	OmpA	0.336911	0.701	0.244045	0.445	3566.23	WB
290	BoLA-2:01801	VAGDHIATV	VAGDHIATV	0	0	0	0	0	VAGDHIATV	OmpA	0.214771	1.129	0.124116	2.206	13054.3	WB
63	BoLA-2:01801	LPTLTPTST	LPTLTPTST	0	0	0	0	0	LPTLTPTST	OmpA	0.145779	1.543	0.123973	2.211	13074.5	WB
113	BoLA-2:01801	LLAPGVNVI	LLAPGVNVI	0	0	0	0	0	LLAPGVNVI	OmpA	0.112872	1.865	0.129995	1.987	12249.8	WB
225	BoLA-2:01801	FGNDGASLI	FGNDGASLI	0	0	0	0	0	FGNDGASLI	OmpA	0.107528	1.928	0.152017	1.423	9652.65	WB
58	BoLA-2:01802	GPTGVLPTL	GPTGVLPTL	0	0	0	0	0	GPTGVLPTL	OmpA	0.784291	0.111	0.239447	0.472	3748.14	SB
48	BoLA-2:01802	GAFERPQSV	GAFERPQSV	0	0	0	0	0	GAFERPQSV	OmpA	0.433918	0.507	0.125295	2.161	12888.8	WB
127	BoLA-2:01802	DPVVRSLDF	DPVVRSLDF	0	0	0	0	0	DPVVRSLDF	OmpA	0.4305	0.514	0.201313	0.739	5662.47	WB
125	BoLA-2:01802	HVDPVVRSL	HVDPVVRSL	0	0	0	0	0	HVDPVVRSL	OmpA	0.405492	0.564	0.102893	3.202	16424	WB
97	BoLA-2:01802	FPDEAAKAA	FPDEAAKAA	0	0	0	0	0	FPDEAAKAA	OmpA	0.375061	0.625	0.170414	1.093	7910.43	WB
29	BoLA-2:01802	RPWLIGAVV	RPWLIGAVV	0	0	0	0	0	RPWLIGAVV	OmpA	0.336911	0.701	0.244045	0.445	3566.23	WB
290	BoLA-2:01802	VAGDHIATV	VAGDHIATV	0	0	0	0	0	VAGDHIATV	OmpA	0.214771	1.129	0.124116	2.206	13054.3	WB
63	BoLA-2:01802	LPTLTPTST	LPTLTPTST	0	0	0	0	0	LPTLTPTST	OmpA	0.145779	1.543	0.123973	2.211	13074.5	WB
113	BoLA-2:01802	LLAPGVNVI	LLAPGVNVI	0	0	0	0	0	LLAPGVNVI	OmpA	0.112872	1.865	0.129995	1.987	12249.8	WB
225	BoLA-2:01802	FGNDGASLI	FGNDGASLI	0	0	0	0	0	FGNDGASLI	OmpA	0.107528	1.928	0.152017	1.423	9652.65	WB
276	BoLA-2:02201	QRAKIVADY	QRAKIVADY	0	0	0	0	0	QRAKIVADY	OmpA	0.397354	0.027	0.299191	0.058	1963.72	SB
23	BoLA-2:02201	YRGSPGRPW	YRGSPGRPW	0	0	0	0	0	YRGSPGRPW	OmpA	0.244813	0.119	0.224161	0.244	4422.26	SB
85	BoLA-2:02201	SRSGNTVTL	SRSGNTVTL	0	0	0	0	0	SRSGNTVTL	OmpA	0.22656	0.143	0.1787	0.586	7232.1	SB
175	BoLA-2:02201	VKRAATSTW	VKRAATSTW	0	0	0	0	0	VKRAATSTW	OmpA	0.13696	0.333	0.200532	0.402	5710.53	SB
71	BoLA-2:02201	TRGASALSL	TRGASALSL	0	0	0	0	0	TRGASALSL	OmpA	0.080679	0.703	0.151716	0.995	9684.14	WB
125	BoLA-2:02201	HVDPVVRSL	HVDPVVRSL	0	0	0	0	0	HVDPVVRSL	OmpA	0.034386	1.78	0.052908	13.182	28207	WB
48	BoLA-2:02501	GAFERPQSV	GAFERPQSV	0	0	0	0	0	GAFERPQSV	OmpA	0.275942	0.095	0.152624	0.592	9589.46	SB
102	BoLA-2:02501	AKAALMTAL	AKAALMTAL	0	0	0	0	0	AKAALMTAL	OmpA	0.156167	0.305	0.181457	0.281	7019.55	SB
125	BoLA-2:02501	HVDPVVRSL	HVDPVVRSL	0	0	0	0	0	HVDPVVRSL	OmpA	0.105793	0.533	0.069111	8.983	23671.2	WB
85	BoLA-2:02501	SRSGNTVTL	SRSGNTVTL	0	0	0	0	0	SRSGNTVTL	OmpA	0.094157	0.635	0.116132	1.7	14232.1	WB
196	BoLA-2:02501	GQAPPGPPA	GQAPPGPPA	0	0	0	0	0	GQAPPGPPA	OmpA	0.077857	0.875	0.120818	1.463	13528.5	WB
217	BoLA-2:02501	AVTGGPIAF	AVTGGPIAF	0	0	0	0	0	AVTGGPIAF	OmpA	0.057887	1.345	0.073618	7.558	22544.5	WB
138	BoLA-2:02501	AEPVFTASV	AEPVFTASV	0	0	0	0	0	AEPVFTASV	OmpA	0.054105	1.472	0.12018	1.494	13622.2	WB
315	BoLA-2:02501	RAKNRRVEI	RAKNRRVEI	0	0	0	0	0	RAKNRRVEI	OmpA	0.043853	1.964	0.087949	4.463	19306.4	WB
316	BoLA-2:02601	AKNRRVEIV	AKNRRVEIV	0	0	0	0	0	AKNRRVEIV	OmpA	0.564333	0.15	0.413748	0.307	568.57	SB
102	BoLA-2:02601	AKAALMTAL	AKAALMTAL	0	0	0	0	0	AKAALMTAL	OmpA	0.503636	0.22	0.460309	0.143	343.55	SB
186	BoLA-2:02601	MKIVNNIEV	MKIVNNIEV	0	0	0	0	0	MKIVNNIEV	OmpA	0.382473	0.441	0.484529	0.096	264.35	SB
48	BoLA-2:02601	GAFERPQSV	GAFERPQSV	0	0	0	0	0	GAFERPQSV	OmpA	0.294194	0.699	0.27085	2.168	2668.42	WB
85	BoLA-2:02601	SRSGNTVTL	SRSGNTVTL	0	0	0	0	0	SRSGNTVTL	OmpA	0.288853	0.721	0.277575	1.967	2481.15	WB
175	BoLA-2:02601	VKRAATSTW	VKRAATSTW	0	0	0	0	0	VKRAATSTW	OmpA	0.260502	0.838	0.295917	1.546	2034.53	WB
278	BoLA-2:02601	AKIVADYLV	AKIVADYLV	0	0	0	0	0	AKIVADYLV	OmpA	0.208744	1.098	0.404392	0.355	629.14	WB
315	BoLA-2:02601	RAKNRRVEI	RAKNRRVEI	0	0	0	0	0	RAKNRRVEI	OmpA	0.147104	1.633	0.260012	2.498	3000.41	WB
125	BoLA-2:02601	HVDPVVRSL	HVDPVVRSL	0	0	0	0	0	HVDPVVRSL	OmpA	0.142063	1.691	0.141497	13.025	10816.3	WB
316	BoLA-2:02602	AKNRRVEIV	AKNRRVEIV	0	0	0	0	0	AKNRRVEIV	OmpA	0.564333	0.15	0.413748	0.307	568.57	SB
102	BoLA-2:02602	AKAALMTAL	AKAALMTAL	0	0	0	0	0	AKAALMTAL	OmpA	0.503636	0.22	0.460309	0.143	343.55	SB
186	BoLA-2:02602	MKIVNNIEV	MKIVNNIEV	0	0	0	0	0	MKIVNNIEV	OmpA	0.382473	0.441	0.484529	0.096	264.35	SB
48	BoLA-2:02602	GAFERPQSV	GAFERPQSV	0	0	0	0	0	GAFERPQSV	OmpA	0.294194	0.699	0.27085	2.168	2668.42	WB
85	BoLA-2:02602	SRSGNTVTL	SRSGNTVTL	0	0	0	0	0	SRSGNTVTL	OmpA	0.288853	0.721	0.277575	1.967	2481.15	WB
175	BoLA-2:02602	VKRAATSTW	VKRAATSTW	0	0	0	0	0	VKRAATSTW	OmpA	0.260502	0.838	0.295917	1.546	2034.53	WB
278	BoLA-2:02602	AKIVADYLV	AKIVADYLV	0	0	0	0	0	AKIVADYLV	OmpA	0.208744	1.098	0.404392	0.355	629.14	WB
315	BoLA-2:02602	RAKNRRVEI	RAKNRRVEI	0	0	0	0	0	RAKNRRVEI	OmpA	0.147104	1.633	0.260012	2.498	3000.41	WB
125	BoLA-2:02602	HVDPVVRSL	HVDPVVRSL	0	0	0	0	0	HVDPVVRSL	OmpA	0.142063	1.691	0.141497	13.025	10816.3	WB
316	BoLA-2:02603	AKNRRVEIV	AKNRRVEIV	0	0	0	0	0	AKNRRVEIV	OmpA	0.564333	0.15	0.413748	0.307	568.57	SB
102	BoLA-2:02603	AKAALMTAL	AKAALMTAL	0	0	0	0	0	AKAALMTAL	OmpA	0.503636	0.22	0.460309	0.143	343.55	SB
186	BoLA-2:02603	MKIVNNIEV	MKIVNNIEV	0	0	0	0	0	MKIVNNIEV	OmpA	0.382473	0.441	0.484529	0.096	264.35	SB
48	BoLA-2:02603	GAFERPQSV	GAFERPQSV	0	0	0	0	0	GAFERPQSV	OmpA	0.294194	0.699	0.27085	2.168	2668.42	WB
85	BoLA-2:02603	SRSGNTVTL	SRSGNTVTL	0	0	0	0	0	SRSGNTVTL	OmpA	0.288853	0.721	0.277575	1.967	2481.15	WB
175	BoLA-2:02603	VKRAATSTW	VKRAATSTW	0	0	0	0	0	VKRAATSTW	OmpA	0.260502	0.838	0.295917	1.546	2034.53	WB
278	BoLA-2:02603	AKIVADYLV	AKIVADYLV	0	0	0	0	0	AKIVADYLV	OmpA	0.208744	1.098	0.404392	0.355	629.14	WB
315	BoLA-2:02603	RAKNRRVEI	RAKNRRVEI	0	0	0	0	0	RAKNRRVEI	OmpA	0.147104	1.633	0.260012	2.498	3000.41	WB
125	BoLA-2:02603	HVDPVVRSL	HVDPVVRSL	0	0	0	0	0	HVDPVVRSL	OmpA	0.142063	1.691	0.141497	13.025	10816.3	WB
48	BoLA-2:03001	GAFERPQSV	GAFERPQSV	0	0	0	0	0	GAFERPQSV	OmpA	0.202388	0.069	0.111866	0.671	14904.4	SB
125	BoLA-2:03001	HVDPVVRSL	HVDPVVRSL	0	0	0	0	0	HVDPVVRSL	OmpA	0.197049	0.078	0.087226	1.734	19458	SB
58	BoLA-2:03001	GPTGVLPTL	GPTGVLPTL	0	0	0	0	0	GPTGVLPTL	OmpA	0.16163	0.137	0.114308	0.607	14515.8	SB
29	BoLA-2:03001	RPWLIGAVV	RPWLIGAVV	0	0	0	0	0	RPWLIGAVV	OmpA	0.072409	0.714	0.118067	0.534	13937.2	WB
73	BoLA-2:03001	GASALSLSL	GASALSLSL	0	0	0	0	0	GASALSLSL	OmpA	0.069734	0.758	0.107063	0.813	15699.4	WB
315	BoLA-2:03001	RAKNRRVEI	RAKNRRVEI	0	0	0	0	0	RAKNRRVEI	OmpA	0.068525	0.777	0.102888	0.952	16424.9	WB
24	BoLA-2:03001	RGSPGRPWL	RGSPGRPWL	0	0	0	0	0	RGSPGRPWL	OmpA	0.057764	1.019	0.101793	0.991	16620.6	WB
97	BoLA-2:03001	FPDEAAKAA	FPDEAAKAA	0	0	0	0	0	FPDEAAKAA	OmpA	0.057224	1.033	0.063294	4.683	25208.9	WB
290	BoLA-2:03001	VAGDHIATV	VAGDHIATV	0	0	0	0	0	VAGDHIATV	OmpA	0.056626	1.048	0.0905	1.515	18780.8	WB
154	BoLA-2:03001	KVERDTVTL	KVERDTVTL	0	0	0	0	0	KVERDTVTL	OmpA	0.055792	1.069	0.068069	3.834	23939.5	WB
85	BoLA-2:03001	SRSGNTVTL	SRSGNTVTL	0	0	0	0	0	SRSGNTVTL	OmpA	0.05453	1.102	0.084231	1.95	20098.8	WB
69	BoLA-2:03001	TSTRGASAL	TSTRGASAL	0	0	0	0	0	TSTRGASAL	OmpA	0.05276	1.156	0.120921	0.482	13513.4	WB
55	BoLA-2:03001	SVTGPTGVL	SVTGPTGVL	0	0	0	0	0	SVTGPTGVL	OmpA	0.048085	1.3	0.102093	0.98	16566.8	WB
277	BoLA-2:03001	RAKIVADYL	RAKIVADYL	0	0	0	0	0	RAKIVADYL	OmpA	0.044552	1.453	0.091556	1.454	18567.4	WB
198	BoLA-2:03001	APPGPPASG	APPGPPASG	0	0	0	0	0	APPGPPASG	OmpA	0.043675	1.489	0.065573	4.252	24594.9	WB
217	BoLA-2:03001	AVTGGPIAF	AVTGGPIAF	0	0	0	0	0	AVTGGPIAF	OmpA	0.041196	1.593	0.05991	5.427	26149	WB
74	BoLA-2:03001	ASALSLSLL	ASALSLSLL	0	0	0	0	0	ASALSLSLL	OmpA	0.040826	1.61	0.104842	0.884	16081.3	WB
231	BoLA-2:03001	SLIPADYEI	SLIPADYEI	0	0	0	0	0	SLIPADYEI	OmpA	0.03924	1.691	0.095112	1.271	17866.6	WB
127	BoLA-2:03001	DPVVRSLDF	DPVVRSLDF	0	0	0	0	0	DPVVRSLDF	OmpA	0.03751	1.799	0.063247	4.692	25221.7	WB
102	BoLA-2:03001	AKAALMTAL	AKAALMTAL	0	0	0	0	0	AKAALMTAL	OmpA	0.036522	1.859	0.088407	1.65	19210.9	WB
136	BoLA-2:03001	SSAEPVFTA	SSAEPVFTA	0	0	0	0	0	SSAEPVFTA	OmpA	0.034806	1.957	0.079605	2.371	21130.4	WB
164	BoLA-2:03202	GTAPSSEHK	GTAPSSEHK	0	0	0	0	0	GTAPSSEHK	OmpA	0.271574	0.211	0.227767	1.498	4253.04	SB
280	BoLA-2:03202	IVADYLVAR	IVADYLVAR	0	0	0	0	0	IVADYLVAR	OmpA	0.23955	0.298	0.236687	1.293	3861.76	SB
48	BoLA-2:03202	GAFERPQSV	GAFERPQSV	0	0	0	0	0	GAFERPQSV	OmpA	0.170444	0.604	0.165713	4.477	8323.18	WB
136	BoLA-2:03202	SSAEPVFTA	SSAEPVFTA	0	0	0	0	0	SSAEPVFTA	OmpA	0.168826	0.616	0.19819	2.523	5857.08	WB
125	BoLA-2:03202	HVDPVVRSL	HVDPVVRSL	0	0	0	0	0	HVDPVVRSL	OmpA	0.156704	0.705	0.106837	13.176	15737.9	WB
179	BoLA-2:03202	ATSTWPDMK	ATSTWPDMK	0	0	0	0	0	ATSTWPDMK	OmpA	0.156251	0.708	0.227215	1.511	4278.52	WB
13	BoLA-2:03202	TTDARRTQK	TTDARRTQK	0	0	0	0	0	TTDARRTQK	OmpA	0.154926	0.719	0.171788	4.012	7793.7	WB
269	BoLA-2:03202	INIPLSAQR	INIPLSAQR	0	0	0	0	0	INIPLSAQR	OmpA	0.126386	0.988	0.16104	4.875	8754.83	WB
307	BoLA-2:03202	ASNATPEGR	ASNATPEGR	0	0	0	0	0	ASNATPEGR	OmpA	0.124651	1.01	0.165964	4.457	8300.61	WB
181	BoLA-2:03202	STWPDMKIV	STWPDMKIV	0	0	0	0	0	STWPDMKIV	OmpA	0.116247	1.133	0.183022	3.294	6901.68	WB
217	BoLA-2:03202	AVTGGPIAF	AVTGGPIAF	0	0	0	0	0	AVTGGPIAF	OmpA	0.10476	1.333	0.127298	8.956	12612.5	WB
74	BoLA-2:03202	ASALSLSLL	ASALSLSLL	0	0	0	0	0	ASALSLSLL	OmpA	0.094798	1.546	0.213374	1.912	4969.72	WB
36	BoLA-2:03202	VVIPLLIAA	VVIPLLIAA	0	0	0	0	0	VVIPLLIAA	OmpA	0.081585	1.894	0.165468	4.495	8345.28	WB
276	BoLA-2:04301	QRAKIVADY	QRAKIVADY	0	0	0	0	0	QRAKIVADY	OmpA	0.125615	0.72	0.164378	2.034	8444.28	WB
229	BoLA-2:04301	GASLIPADY	GASLIPADY	0	0	0	0	0	GASLIPADY	OmpA	0.113883	0.881	0.164124	2.047	8467.52	WB
125	BoLA-2:04301	HVDPVVRSL	HVDPVVRSL	0	0	0	0	0	HVDPVVRSL	OmpA	0.108725	0.967	0.066218	21.206	24423.8	WB
14	BoLA-2:04301	TDARRTQKF	TDARRTQKF	0	0	0	0	0	TDARRTQKF	OmpA	0.095123	1.23	0.088865	11.707	19116	WB
33	BoLA-2:04301	IGAVVIPLL	IGAVVIPLL	0	0	0	0	0	IGAVVIPLL	OmpA	0.09339	1.272	0.212528	0.708	5015.42	WB
143	BoLA-2:04301	TASVPIPDF	TASVPIPDF	0	0	0	0	0	TASVPIPDF	OmpA	0.091782	1.311	0.132463	4.146	11927	WB
252	BoLA-2:04301	DARVTINGY	DARVTINGY	0	0	0	0	0	DARVTINGY	OmpA	0.086263	1.46	0.102182	8.406	16550.8	WB
85	BoLA-2:04301	SRSGNTVTL	SRSGNTVTL	0	0	0	0	0	SRSGNTVTL	OmpA	0.084514	1.508	0.11081	6.873	15075.7	WB
217	BoLA-2:04301	AVTGGPIAF	AVTGGPIAF	0	0	0	0	0	AVTGGPIAF	OmpA	0.081406	1.594	0.107779	7.369	15578.3	WB
15	BoLA-2:04301	DARRTQKFY	DARRTQKFY	0	0	0	0	0	DARRTQKFY	OmpA	0.080897	1.609	0.103239	8.2	16362.6	WB
175	BoLA-2:04301	VKRAATSTW	VKRAATSTW	0	0	0	0	0	VKRAATSTW	OmpA	0.077407	1.715	0.121123	5.41	13483.9	WB
269	BoLA-2:04301	INIPLSAQR	INIPLSAQR	0	0	0	0	0	INIPLSAQR	OmpA	0.072203	1.898	0.132245	4.168	11955.1	WB
125	BoLA-2:04401	HVDPVVRSL	HVDPVVRSL	0	0	0	0	0	HVDPVVRSL	OmpA	0.368271	0.441	0.141008	7.801	10873.7	SB
217	BoLA-2:04401	AVTGGPIAF	AVTGGPIAF	0	0	0	0	0	AVTGGPIAF	OmpA	0.290435	0.855	0.163485	5.019	8526.27	WB
269	BoLA-2:04401	INIPLSAQR	INIPLSAQR	0	0	0	0	0	INIPLSAQR	OmpA	0.279072	0.95	0.205272	2.28	5425.04	WB
229	BoLA-2:04401	GASLIPADY	GASLIPADY	0	0	0	0	0	GASLIPADY	OmpA	0.269045	1.04	0.208053	2.169	5264.23	WB
143	BoLA-2:04401	TASVPIPDF	TASVPIPDF	0	0	0	0	0	TASVPIPDF	OmpA	0.25254	1.194	0.176976	3.853	7368.27	WB
280	BoLA-2:04401	IVADYLVAR	IVADYLVAR	0	0	0	0	0	IVADYLVAR	OmpA	0.236436	1.387	0.187778	3.142	6555.52	WB
164	BoLA-2:04401	GTAPSSEHK	GTAPSSEHK	0	0	0	0	0	GTAPSSEHK	OmpA	0.210284	1.767	0.156211	5.804	9224.42	WB
74	BoLA-2:04401	ASALSLSLL	ASALSLSLL	0	0	0	0	0	ASALSLSLL	OmpA	0.203221	1.886	0.196328	2.679	5976.28	WB
125	BoLA-2:04402	HVDPVVRSL	HVDPVVRSL	0	0	0	0	0	HVDPVVRSL	OmpA	0.20006	0.343	0.10229	7.918	16531.5	SB
217	BoLA-2:04402	AVTGGPIAF	AVTGGPIAF	0	0	0	0	0	AVTGGPIAF	OmpA	0.190795	0.385	0.155156	2.397	9330.32	SB
143	BoLA-2:04402	TASVPIPDF	TASVPIPDF	0	0	0	0	0	TASVPIPDF	OmpA	0.142	0.684	0.176494	1.499	7406.79	WB
48	BoLA-2:04402	GAFERPQSV	GAFERPQSV	0	0	0	0	0	GAFERPQSV	OmpA	0.122451	0.909	0.11463	5.916	14465.3	WB
229	BoLA-2:04402	GASLIPADY	GASLIPADY	0	0	0	0	0	GASLIPADY	OmpA	0.11013	1.117	0.164921	1.919	8394.82	WB
74	BoLA-2:04402	ASALSLSLL	ASALSLSLL	0	0	0	0	0	ASALSLSLL	OmpA	0.101054	1.291	0.178803	1.434	7224.04	WB
136	BoLA-2:04402	SSAEPVFTA	SSAEPVFTA	0	0	0	0	0	SSAEPVFTA	OmpA	0.097152	1.375	0.157039	2.304	9142.15	WB
73	BoLA-2:04402	GASALSLSL	GASALSLSL	0	0	0	0	0	GASALSLSL	OmpA	0.086818	1.629	0.160491	2.133	8806.99	WB
277	BoLA-2:04402	RAKIVADYL	RAKIVADYL	0	0	0	0	0	RAKIVADYL	OmpA	0.08333	1.724	0.162739	2.021	8595.37	WB
269	BoLA-2:04402	INIPLSAQR	INIPLSAQR	0	0	0	0	0	INIPLSAQR	OmpA	0.080723	1.801	0.116391	5.673	14192.3	WB
164	BoLA-2:04501	GTAPSSEHK	GTAPSSEHK	0	0	0	0	0	GTAPSSEHK	OmpA	0.332166	0.238	0.198487	1.351	5838.29	SB
125	BoLA-2:04501	HVDPVVRSL	HVDPVVRSL	0	0	0	0	0	HVDPVVRSL	OmpA	0.263504	0.425	0.118277	7.381	13905.6	SB
280	BoLA-2:04501	IVADYLVAR	IVADYLVAR	0	0	0	0	0	IVADYLVAR	OmpA	0.260189	0.438	0.190404	1.582	6371.88	SB
13	BoLA-2:04501	TTDARRTQK	TTDARRTQK	0	0	0	0	0	TTDARRTQK	OmpA	0.193401	0.806	0.158742	3.096	8975.24	WB
217	BoLA-2:04501	AVTGGPIAF	AVTGGPIAF	0	0	0	0	0	AVTGGPIAF	OmpA	0.175657	0.959	0.126554	6.167	12714.4	WB
179	BoLA-2:04501	ATSTWPDMK	ATSTWPDMK	0	0	0	0	0	ATSTWPDMK	OmpA	0.172955	0.983	0.19074	1.572	6348.75	WB
229	BoLA-2:04501	GASLIPADY	GASLIPADY	0	0	0	0	0	GASLIPADY	OmpA	0.159693	1.139	0.179325	1.988	7183.35	WB
269	BoLA-2:04501	INIPLSAQR	INIPLSAQR	0	0	0	0	0	INIPLSAQR	OmpA	0.153793	1.21	0.141966	4.444	10761.6	WB
48	BoLA-2:04501	GAFERPQSV	GAFERPQSV	0	0	0	0	0	GAFERPQSV	OmpA	0.145784	1.309	0.125046	6.374	12923.6	WB
136	BoLA-2:04501	SSAEPVFTA	SSAEPVFTA	0	0	0	0	0	SSAEPVFTA	OmpA	0.141295	1.381	0.152908	3.526	9560.05	WB
307	BoLA-2:04501	ASNATPEGR	ASNATPEGR	0	0	0	0	0	ASNATPEGR	OmpA	0.139091	1.418	0.144903	4.19	10425	WB
64	BoLA-2:04501	PTLTPTSTR	PTLTPTSTR	0	0	0	0	0	PTLTPTSTR	OmpA	0.133149	1.524	0.12774	6.005	12552.3	WB
181	BoLA-2:04501	STWPDMKIV	STWPDMKIV	0	0	0	0	0	STWPDMKIV	OmpA	0.123722	1.714	0.149016	3.844	9971.22	WB
74	BoLA-2:04501	ASALSLSLL	ASALSLSLL	0	0	0	0	0	ASALSLSLL	OmpA	0.122858	1.732	0.204192	1.192	5488.81	WB
309	BoLA-2:04501	NATPEGRAK	NATPEGRAK	0	0	0	0	0	NATPEGRAK	OmpA	0.116235	1.87	0.105066	9.96	16042.4	WB
143	BoLA-2:04501	TASVPIPDF	TASVPIPDF	0	0	0	0	0	TASVPIPDF	OmpA	0.115953	1.876	0.141312	4.501	10838	WB
252	BoLA-2:04501	DARVTINGY	DARVTINGY	0	0	0	0	0	DARVTINGY	OmpA	0.112739	1.948	0.119254	7.223	13759.4	WB
48	BoLA-2:04601	GAFERPQSV	GAFERPQSV	0	0	0	0	0	GAFERPQSV	OmpA	0.175508	0.594	0.153761	6.602	9472.21	WB
276	BoLA-2:04601	QRAKIVADY	QRAKIVADY	0	0	0	0	0	QRAKIVADY	OmpA	0.145449	0.872	0.206605	2.251	5347.36	WB
85	BoLA-2:04601	SRSGNTVTL	SRSGNTVTL	0	0	0	0	0	SRSGNTVTL	OmpA	0.143954	0.889	0.169322	4.774	8004.44	WB
125	BoLA-2:04601	HVDPVVRSL	HVDPVVRSL	0	0	0	0	0	HVDPVVRSL	OmpA	0.141106	0.924	0.100809	20.088	16798.5	WB
217	BoLA-2:04601	AVTGGPIAF	AVTGGPIAF	0	0	0	0	0	AVTGGPIAF	OmpA	0.137321	0.97	0.16298	5.427	8572.98	WB
74	BoLA-2:04601	ASALSLSLL	ASALSLSLL	0	0	0	0	0	ASALSLSLL	OmpA	0.13141	1.051	0.240282	1.162	3714.43	WB
33	BoLA-2:04601	IGAVVIPLL	IGAVVIPLL	0	0	0	0	0	IGAVVIPLL	OmpA	0.127315	1.116	0.280925	0.535	2392.83	WB
175	BoLA-2:04601	VKRAATSTW	VKRAATSTW	0	0	0	0	0	VKRAATSTW	OmpA	0.126303	1.136	0.213351	1.959	4970.96	WB
24	BoLA-2:04601	RGSPGRPWL	RGSPGRPWL	0	0	0	0	0	RGSPGRPWL	OmpA	0.118827	1.281	0.239143	1.184	3760.49	WB
229	BoLA-2:04601	GASLIPADY	GASLIPADY	0	0	0	0	0	GASLIPADY	OmpA	0.104971	1.59	0.175501	4.237	7486.8	WB
163	BoLA-2:04601	TGTAPSSEH	TGTAPSSEH	0	0	0	0	0	TGTAPSSEH	OmpA	0.1021	1.661	0.178038	4.041	7284.08	WB
269	BoLA-2:04601	INIPLSAQR	INIPLSAQR	0	0	0	0	0	INIPLSAQR	OmpA	0.100888	1.692	0.184383	3.555	6800.79	WB
277	BoLA-2:04601	RAKIVADYL	RAKIVADYL	0	0	0	0	0	RAKIVADYL	OmpA	0.099963	1.716	0.204145	2.359	5491.6	WB
42	BoLA-2:04601	IAAIGYGAF	IAAIGYGAF	0	0	0	0	0	IAAIGYGAF	OmpA	0.093754	1.89	0.251392	0.939	3293.72	WB
136	BoLA-2:04601	SSAEPVFTA	SSAEPVFTA	0	0	0	0	0	SSAEPVFTA	OmpA	0.091357	1.977	0.170959	4.611	7863.92	WB
85	BoLA-2:04701	SRSGNTVTL	SRSGNTVTL	0	0	0	0	0	SRSGNTVTL	OmpA	0.242042	0.256	0.263932	1.923	2875.82	SB
24	BoLA-2:04701	RGSPGRPWL	RGSPGRPWL	0	0	0	0	0	RGSPGRPWL	OmpA	0.241322	0.259	0.392349	0.127	716.69	SB
48	BoLA-2:04701	GAFERPQSV	GAFERPQSV	0	0	0	0	0	GAFERPQSV	OmpA	0.208528	0.398	0.198594	6.591	5831.53	SB
276	BoLA-2:04701	QRAKIVADY	QRAKIVADY	0	0	0	0	0	QRAKIVADY	OmpA	0.180993	0.596	0.25266	2.384	3248.84	WB
175	BoLA-2:04701	VKRAATSTW	VKRAATSTW	0	0	0	0	0	VKRAATSTW	OmpA	0.178367	0.617	0.286443	1.214	2254.15	WB
125	BoLA-2:04701	HVDPVVRSL	HVDPVVRSL	0	0	0	0	0	HVDPVVRSL	OmpA	0.177585	0.624	0.140648	18.663	10916.1	WB
315	BoLA-2:04701	RAKNRRVEI	RAKNRRVEI	0	0	0	0	0	RAKNRRVEI	OmpA	0.164242	0.748	0.300077	0.929	1944.99	WB
269	BoLA-2:04701	INIPLSAQR	INIPLSAQR	0	0	0	0	0	INIPLSAQR	OmpA	0.140582	1.045	0.237592	3.183	3824.13	WB
102	BoLA-2:04701	AKAALMTAL	AKAALMTAL	0	0	0	0	0	AKAALMTAL	OmpA	0.133781	1.154	0.264757	1.891	2850.26	WB
217	BoLA-2:04701	AVTGGPIAF	AVTGGPIAF	0	0	0	0	0	AVTGGPIAF	OmpA	0.129247	1.236	0.165833	11.922	8312.39	WB
136	BoLA-2:04701	SSAEPVFTA	SSAEPVFTA	0	0	0	0	0	SSAEPVFTA	OmpA	0.126836	1.28	0.24694	2.656	3456.26	WB
74	BoLA-2:04701	ASALSLSLL	ASALSLSLL	0	0	0	0	0	ASALSLSLL	OmpA	0.126736	1.282	0.311484	0.732	1719.16	WB
277	BoLA-2:04701	RAKIVADYL	RAKIVADYL	0	0	0	0	0	RAKIVADYL	OmpA	0.121784	1.381	0.308026	0.79	1784.7	WB
86	BoLA-2:04701	RSGNTVTLI	RSGNTVTLI	0	0	0	0	0	RSGNTVTLI	OmpA	0.110282	1.625	0.359165	0.28	1026.28	WB
33	BoLA-2:04701	IGAVVIPLL	IGAVVIPLL	0	0	0	0	0	IGAVVIPLL	OmpA	0.104987	1.783	0.301181	0.908	1921.9	WB
71	BoLA-2:04701	TRGASALSL	TRGASALSL	0	0	0	0	0	TRGASALSL	OmpA	0.103238	1.833	0.214988	4.871	4883.69	WB
276	BoLA-2:04801	QRAKIVADY	QRAKIVADY	0	0	0	0	0	QRAKIVADY	OmpA	0.586263	0.12	0.373886	0.219	875.17	SB
23	BoLA-2:04801	YRGSPGRPW	YRGSPGRPW	0	0	0	0	0	YRGSPGRPW	OmpA	0.515445	0.173	0.35122	0.283	1118.4	SB
85	BoLA-2:04801	SRSGNTVTL	SRSGNTVTL	0	0	0	0	0	SRSGNTVTL	OmpA	0.482857	0.204	0.32421	0.395	1498.02	SB
175	BoLA-2:04801	VKRAATSTW	VKRAATSTW	0	0	0	0	0	VKRAATSTW	OmpA	0.278226	0.52	0.258914	0.875	3036.27	WB
71	BoLA-2:04801	TRGASALSL	TRGASALSL	0	0	0	0	0	TRGASALSL	OmpA	0.248744	0.605	0.25787	0.887	3070.77	WB
125	BoLA-2:04801	HVDPVVRSL	HVDPVVRSL	0	0	0	0	0	HVDPVVRSL	OmpA	0.090311	1.869	0.113455	7.756	14650.4	WB
102	BoLA-2:04801	AKAALMTAL	AKAALMTAL	0	0	0	0	0	AKAALMTAL	OmpA	0.086942	1.933	0.196782	1.972	5946.99	WB
48	BoLA-2:05401	GAFERPQSV	GAFERPQSV	0	0	0	0	0	GAFERPQSV	OmpA	0.105967	0.024	0.071204	0.995	23141.1	SB
25	BoLA-2:05401	GSPGRPWLI	GSPGRPWLI	0	0	0	0	0	GSPGRPWLI	OmpA	0.085447	0.044	0.115577	0.123	14317.8	SB
125	BoLA-2:05401	HVDPVVRSL	HVDPVVRSL	0	0	0	0	0	HVDPVVRSL	OmpA	0.078961	0.056	0.050169	2.998	29055.4	SB
136	BoLA-2:05401	SSAEPVFTA	SSAEPVFTA	0	0	0	0	0	SSAEPVFTA	OmpA	0.077712	0.058	0.120654	0.096	13552.5	SB
86	BoLA-2:05401	RSGNTVTLI	RSGNTVTLI	0	0	0	0	0	RSGNTVTLI	OmpA	0.064877	0.096	0.17119	0.012	7844.28	SB
74	BoLA-2:05401	ASALSLSLL	ASALSLSLL	0	0	0	0	0	ASALSLSLL	OmpA	0.059624	0.124	0.128102	0.069	12503.2	SB
235	BoLA-2:05401	ADYEILNRV	ADYEILNRV	0	0	0	0	0	ADYEILNRV	OmpA	0.038234	0.295	0.060621	1.693	25948.6	SB
290	BoLA-2:05401	VAGDHIATV	VAGDHIATV	0	0	0	0	0	VAGDHIATV	OmpA	0.037951	0.299	0.069607	1.073	23544.5	SB
154	BoLA-2:05401	KVERDTVTL	KVERDTVTL	0	0	0	0	0	KVERDTVTL	OmpA	0.03267	0.392	0.048592	3.282	29555.5	SB
55	BoLA-2:05401	SVTGPTGVL	SVTGPTGVL	0	0	0	0	0	SVTGPTGVL	OmpA	0.029204	0.47	0.064621	1.389	24849.5	SB
181	BoLA-2:05401	STWPDMKIV	STWPDMKIV	0	0	0	0	0	STWPDMKIV	OmpA	0.026257	0.551	0.064484	1.399	24886.4	WB
180	BoLA-2:05401	TSTWPDMKI	TSTWPDMKI	0	0	0	0	0	TSTWPDMKI	OmpA	0.025001	0.589	0.092767	0.354	18325.7	WB
73	BoLA-2:05401	GASALSLSL	GASALSLSL	0	0	0	0	0	GASALSLSL	OmpA	0.0221	0.69	0.073842	0.871	22490	WB
231	BoLA-2:05401	SLIPADYEI	SLIPADYEI	0	0	0	0	0	SLIPADYEI	OmpA	0.01937	0.827	0.084001	0.536	20148.9	WB
83	BoLA-2:05401	SISRSGNTV	SISRSGNTV	0	0	0	0	0	SISRSGNTV	OmpA	0.01759	0.95	0.072145	0.949	22906.7	WB
217	BoLA-2:05401	AVTGGPIAF	AVTGGPIAF	0	0	0	0	0	AVTGGPIAF	OmpA	0.017285	0.971	0.038638	5.841	32916.3	WB
249	BoLA-2:05401	ACPDARVTI	ACPDARVTI	0	0	0	0	0	ACPDARVTI	OmpA	0.01672	1.013	0.03349	8.055	34801.8	WB
138	BoLA-2:05401	AEPVFTASV	AEPVFTASV	0	0	0	0	0	AEPVFTASV	OmpA	0.016447	1.036	0.053892	2.438	27908.3	WB
69	BoLA-2:05401	TSTRGASAL	TSTRGASAL	0	0	0	0	0	TSTRGASAL	OmpA	0.015542	1.117	0.066535	1.258	24340.2	WB
54	BoLA-2:05401	QSVTGPTGV	QSVTGPTGV	0	0	0	0	0	QSVTGPTGV	OmpA	0.014984	1.177	0.054996	2.303	27576.9	WB
56	BoLA-2:05401	VTGPTGVLP	VTGPTGVLP	0	0	0	0	0	VTGPTGVLP	OmpA	0.01483	1.193	0.04112	5.034	32044.1	WB
145	BoLA-2:05401	SVPIPDFGL	SVPIPDFGL	0	0	0	0	0	SVPIPDFGL	OmpA	0.013534	1.328	0.039259	5.627	32695.9	WB
263	BoLA-2:05401	NTGSEGINI	NTGSEGINI	0	0	0	0	0	NTGSEGINI	OmpA	0.012696	1.429	0.055801	2.203	27337.8	WB
277	BoLA-2:05401	RAKIVADYL	RAKIVADYL	0	0	0	0	0	RAKIVADYL	OmpA	0.012207	1.49	0.05176	2.752	28559.5	WB
85	BoLA-2:05401	SRSGNTVTL	SRSGNTVTL	0	0	0	0	0	SRSGNTVTL	OmpA	0.012014	1.515	0.040828	5.125	32145.5	WB
315	BoLA-2:05401	RAKNRRVEI	RAKNRRVEI	0	0	0	0	0	RAKNRRVEI	OmpA	0.011131	1.64	0.047312	3.514	29967.6	WB
34	BoLA-2:05401	GAVVIPLLI	GAVVIPLLI	0	0	0	0	0	GAVVIPLLI	OmpA	0.010674	1.711	0.066803	1.242	24269.7	WB
143	BoLA-2:05401	TASVPIPDF	TASVPIPDF	0	0	0	0	0	TASVPIPDF	OmpA	0.01017	1.799	0.040238	5.309	32351.4	WB
273	BoLA-2:05401	LSAQRAKIV	LSAQRAKIV	0	0	0	0	0	LSAQRAKIV	OmpA	0.009561	1.913	0.049555	3.108	29249.1	WB
276	BoLA-2:05501	QRAKIVADY	QRAKIVADY	0	0	0	0	0	QRAKIVADY	OmpA	0.248246	0.174	0.203136	0.554	5551.88	SB
175	BoLA-2:05501	VKRAATSTW	VKRAATSTW	0	0	0	0	0	VKRAATSTW	OmpA	0.207545	0.274	0.199192	0.617	5793.92	SB
102	BoLA-2:05501	AKAALMTAL	AKAALMTAL	0	0	0	0	0	AKAALMTAL	OmpA	0.147173	0.57	0.179778	0.999	7148.23	WB
48	BoLA-2:05501	GAFERPQSV	GAFERPQSV	0	0	0	0	0	GAFERPQSV	OmpA	0.095408	1.161	0.101321	7.847	16705.7	WB
85	BoLA-2:05501	SRSGNTVTL	SRSGNTVTL	0	0	0	0	0	SRSGNTVTL	OmpA	0.094214	1.183	0.108049	6.51	15532.9	WB
125	BoLA-2:05501	HVDPVVRSL	HVDPVVRSL	0	0	0	0	0	HVDPVVRSL	OmpA	0.085523	1.357	0.070511	19.266	23315.3	WB
16	BoLA-2:05501	ARRTQKFYR	ARRTQKFYR	0	0	0	0	0	ARRTQKFYR	OmpA	0.073979	1.691	0.127851	3.807	12537.2	WB
269	BoLA-2:05501	INIPLSAQR	INIPLSAQR	0	0	0	0	0	INIPLSAQR	OmpA	0.070382	1.805	0.111104	6.013	15027.8	WB
23	BoLA-2:05501	YRGSPGRPW	YRGSPGRPW	0	0	0	0	0	YRGSPGRPW	OmpA	0.069939	1.821	0.124964	4.118	12935	WB
169	BoLA-2:05501	SEHKDAVKR	SEHKDAVKR	0	0	0	0	0	SEHKDAVKR	OmpA	0.068495	1.874	0.077884	15.482	21527.6	WB
125	BoLA-2:05601	HVDPVVRSL	HVDPVVRSL	0	0	0	0	0	HVDPVVRSL	OmpA	0.22305	0.058	0.080186	1.342	20998	SB
48	BoLA-2:05601	GAFERPQSV	GAFERPQSV	0	0	0	0	0	GAFERPQSV	OmpA	0.198045	0.087	0.091059	0.839	18667.5	SB
136	BoLA-2:05601	SSAEPVFTA	SSAEPVFTA	0	0	0	0	0	SSAEPVFTA	OmpA	0.177998	0.126	0.112017	0.354	14880.1	SB
290	BoLA-2:05601	VAGDHIATV	VAGDHIATV	0	0	0	0	0	VAGDHIATV	OmpA	0.139135	0.249	0.110191	0.38	15177	SB
74	BoLA-2:05601	ASALSLSLL	ASALSLSLL	0	0	0	0	0	ASALSLSLL	OmpA	0.134175	0.284	0.129654	0.165	12295	SB
25	BoLA-2:05601	GSPGRPWLI	GSPGRPWLI	0	0	0	0	0	GSPGRPWLI	OmpA	0.131991	0.3	0.091537	0.821	18571.2	SB
154	BoLA-2:05601	KVERDTVTL	KVERDTVTL	0	0	0	0	0	KVERDTVTL	OmpA	0.114471	0.41	0.075938	1.634	21985.7	SB
86	BoLA-2:05601	RSGNTVTLI	RSGNTVTLI	0	0	0	0	0	RSGNTVTLI	OmpA	0.099124	0.542	0.126282	0.188	12751.9	WB
235	BoLA-2:05601	ADYEILNRV	ADYEILNRV	0	0	0	0	0	ADYEILNRV	OmpA	0.097655	0.561	0.074239	1.763	22393.6	WB
143	BoLA-2:05601	TASVPIPDF	TASVPIPDF	0	0	0	0	0	TASVPIPDF	OmpA	0.092852	0.625	0.081473	1.266	20707.7	WB
145	BoLA-2:05601	SVPIPDFGL	SVPIPDFGL	0	0	0	0	0	SVPIPDFGL	OmpA	0.09073	0.655	0.068932	2.265	23717	WB
180	BoLA-2:05601	TSTWPDMKI	TSTWPDMKI	0	0	0	0	0	TSTWPDMKI	OmpA	0.086429	0.719	0.10298	0.504	16408.5	WB
231	BoLA-2:05601	SLIPADYEI	SLIPADYEI	0	0	0	0	0	SLIPADYEI	OmpA	0.085953	0.726	0.10078	0.556	16803.8	WB
181	BoLA-2:05601	STWPDMKIV	STWPDMKIV	0	0	0	0	0	STWPDMKIV	OmpA	0.067928	1.067	0.071094	2.04	23168.7	WB
33	BoLA-2:05601	IGAVVIPLL	IGAVVIPLL	0	0	0	0	0	IGAVVIPLL	OmpA	0.067212	1.086	0.099782	0.579	16986.2	WB
73	BoLA-2:05601	GASALSLSL	GASALSLSL	0	0	0	0	0	GASALSLSL	OmpA	0.066062	1.117	0.087509	0.974	19398.5	WB
277	BoLA-2:05601	RAKIVADYL	RAKIVADYL	0	0	0	0	0	RAKIVADYL	OmpA	0.06271	1.207	0.082534	1.207	20471.3	WB
58	BoLA-2:05601	GPTGVLPTL	GPTGVLPTL	0	0	0	0	0	GPTGVLPTL	OmpA	0.054128	1.501	0.04622	6.981	30323.8	WB
69	BoLA-2:05601	TSTRGASAL	TSTRGASAL	0	0	0	0	0	TSTRGASAL	OmpA	0.052717	1.558	0.077261	1.538	21673.2	WB
54	BoLA-2:05601	QSVTGPTGV	QSVTGPTGV	0	0	0	0	0	QSVTGPTGV	OmpA	0.050501	1.651	0.05641	4.14	27158.2	WB
265	BoLA-2:05601	GSEGINIPL	GSEGINIPL	0	0	0	0	0	GSEGINIPL	OmpA	0.043669	1.997	0.070349	2.118	23356.2	WB
48	BoLA-2:05701	GAFERPQSV	GAFERPQSV	0	0	0	0	0	GAFERPQSV	OmpA	0.562969	0.035	0.27277	0.297	2613.56	SB
125	BoLA-2:05701	HVDPVVRSL	HVDPVVRSL	0	0	0	0	0	HVDPVVRSL	OmpA	0.526127	0.049	0.188725	1.986	6488.69	SB
231	BoLA-2:05701	SLIPADYEI	SLIPADYEI	0	0	0	0	0	SLIPADYEI	OmpA	0.327166	0.338	0.300259	0.15	1941.16	SB
290	BoLA-2:05701	VAGDHIATV	VAGDHIATV	0	0	0	0	0	VAGDHIATV	OmpA	0.251811	0.643	0.195715	1.72	6016.04	WB
105	BoLA-2:05701	ALMTALNGL	ALMTALNGL	0	0	0	0	0	ALMTALNGL	OmpA	0.234158	0.758	0.305948	0.133	1825.28	WB
277	BoLA-2:05701	RAKIVADYL	RAKIVADYL	0	0	0	0	0	RAKIVADYL	OmpA	0.225119	0.826	0.206321	1.384	5363.82	WB
315	BoLA-2:05701	RAKNRRVEI	RAKNRRVEI	0	0	0	0	0	RAKNRRVEI	OmpA	0.20444	0.985	0.162652	3.432	8603.46	WB
181	BoLA-2:05701	STWPDMKIV	STWPDMKIV	0	0	0	0	0	STWPDMKIV	OmpA	0.19455	1.082	0.18803	2.015	6537.67	WB
113	BoLA-2:05701	LLAPGVNVI	LLAPGVNVI	0	0	0	0	0	LLAPGVNVI	OmpA	0.194274	1.085	0.197196	1.668	5920.41	WB
217	BoLA-2:05701	AVTGGPIAF	AVTGGPIAF	0	0	0	0	0	AVTGGPIAF	OmpA	0.189924	1.136	0.142581	5.117	10690.2	WB
136	BoLA-2:05701	SSAEPVFTA	SSAEPVFTA	0	0	0	0	0	SSAEPVFTA	OmpA	0.172839	1.348	0.176463	2.572	7409.27	WB
73	BoLA-2:05701	GASALSLSL	GASALSLSL	0	0	0	0	0	GASALSLSL	OmpA	0.161369	1.52	0.201804	1.51	5632.47	WB
55	BoLA-2:05701	SVTGPTGVL	SVTGPTGVL	0	0	0	0	0	SVTGPTGVL	OmpA	0.156037	1.609	0.157365	3.819	9109.97	WB
239	BoLA-2:05701	ILNRVADKL	ILNRVADKL	0	0	0	0	0	ILNRVADKL	OmpA	0.144343	1.821	0.168187	3.068	8103.34	WB
48	BoLA-2:06001	GAFERPQSV	GAFERPQSV	0	0	0	0	0	GAFERPQSV	OmpA	0.176925	0.14	0.109657	0.83	15264.9	SB
125	BoLA-2:06001	HVDPVVRSL	HVDPVVRSL	0	0	0	0	0	HVDPVVRSL	OmpA	0.102861	0.47	0.056997	8.982	26986.3	SB
102	BoLA-2:06001	AKAALMTAL	AKAALMTAL	0	0	0	0	0	AKAALMTAL	OmpA	0.097952	0.51	0.140253	0.238	10962.9	WB
85	BoLA-2:06001	SRSGNTVTL	SRSGNTVTL	0	0	0	0	0	SRSGNTVTL	OmpA	0.09707	0.519	0.105237	0.957	16012.7	WB
138	BoLA-2:06001	AEPVFTASV	AEPVFTASV	0	0	0	0	0	AEPVFTASV	OmpA	0.093633	0.552	0.12501	0.433	12928.6	WB
196	BoLA-2:06001	GQAPPGPPA	GQAPPGPPA	0	0	0	0	0	GQAPPGPPA	OmpA	0.069128	0.895	0.093259	1.568	18228.4	WB
315	BoLA-2:06001	RAKNRRVEI	RAKNRRVEI	0	0	0	0	0	RAKNRRVEI	OmpA	0.050132	1.446	0.08846	1.958	19199.9	WB
58	BoLA-2:06001	GPTGVLPTL	GPTGVLPTL	0	0	0	0	0	GPTGVLPTL	OmpA	0.040697	1.95	0.056525	9.198	27124.4	WB
229	BoLA-2:06201	GASLIPADY	GASLIPADY	0	0	0	0	0	GASLIPADY	OmpA	0.352804	0.385	0.340351	0.526	1257.97	SB
217	BoLA-2:06201	AVTGGPIAF	AVTGGPIAF	0	0	0	0	0	AVTGGPIAF	OmpA	0.287058	0.61	0.219716	3.115	4640.14	WB
125	BoLA-2:06201	HVDPVVRSL	HVDPVVRSL	0	0	0	0	0	HVDPVVRSL	OmpA	0.280677	0.641	0.141482	9.894	10818.1	WB
48	BoLA-2:06201	GAFERPQSV	GAFERPQSV	0	0	0	0	0	GAFERPQSV	OmpA	0.254471	0.776	0.191697	4.667	6283.35	WB
175	BoLA-2:06201	VKRAATSTW	VKRAATSTW	0	0	0	0	0	VKRAATSTW	OmpA	0.209236	1.091	0.254787	1.888	3174.93	WB
252	BoLA-2:06201	DARVTINGY	DARVTINGY	0	0	0	0	0	DARVTINGY	OmpA	0.153434	1.754	0.160397	7.404	8815.96	WB
15	BoLA-2:06201	DARRTQKFY	DARRTQKFY	0	0	0	0	0	DARRTQKFY	OmpA	0.139177	1.991	0.157524	7.729	9094.3	WB
125	BoLA-2:06901	HVDPVVRSL	HVDPVVRSL	0	0	0	0	0	HVDPVVRSL	OmpA	0.195039	0.119	0.144002	3.06	10527.1	SB
217	BoLA-2:06901	AVTGGPIAF	AVTGGPIAF	0	0	0	0	0	AVTGGPIAF	OmpA	0.18616	0.136	0.202104	0.806	5614.22	SB
48	BoLA-2:06901	GAFERPQSV	GAFERPQSV	0	0	0	0	0	GAFERPQSV	OmpA	0.136465	0.301	0.159824	2.129	8870.78	SB
85	BoLA-2:06901	SRSGNTVTL	SRSGNTVTL	0	0	0	0	0	SRSGNTVTL	OmpA	0.102426	0.561	0.15675	2.282	9170.79	WB
73	BoLA-2:06901	GASALSLSL	GASALSLSL	0	0	0	0	0	GASALSLSL	OmpA	0.09726	0.623	0.226494	0.472	4312.03	WB
229	BoLA-2:06901	GASLIPADY	GASLIPADY	0	0	0	0	0	GASLIPADY	OmpA	0.094556	0.655	0.198155	0.884	5859.3	WB
143	BoLA-2:06901	TASVPIPDF	TASVPIPDF	0	0	0	0	0	TASVPIPDF	OmpA	0.085228	0.779	0.177679	1.425	7312.43	WB
55	BoLA-2:06901	SVTGPTGVL	SVTGPTGVL	0	0	0	0	0	SVTGPTGVL	OmpA	0.072415	1.036	0.164341	1.911	8447.67	WB
175	BoLA-2:06901	VKRAATSTW	VKRAATSTW	0	0	0	0	0	VKRAATSTW	OmpA	0.066266	1.188	0.154637	2.387	9382.87	WB
102	BoLA-2:06901	AKAALMTAL	AKAALMTAL	0	0	0	0	0	AKAALMTAL	OmpA	0.058351	1.425	0.166224	1.831	8277.29	WB
23	BoLA-2:06901	YRGSPGRPW	YRGSPGRPW	0	0	0	0	0	YRGSPGRPW	OmpA	0.056239	1.5	0.127996	4.343	12517.6	WB
276	BoLA-2:06901	QRAKIVADY	QRAKIVADY	0	0	0	0	0	QRAKIVADY	OmpA	0.056079	1.506	0.140287	3.322	10958.9	WB
74	BoLA-2:06901	ASALSLSLL	ASALSLSLL	0	0	0	0	0	ASALSLSLL	OmpA	0.05403	1.589	0.179131	1.379	7198.44	WB
69	BoLA-2:06901	TSTRGASAL	TSTRGASAL	0	0	0	0	0	TSTRGASAL	OmpA	0.048832	1.837	0.153989	2.419	9448.88	WB
277	BoLA-2:06901	RAKIVADYL	RAKIVADYL	0	0	0	0	0	RAKIVADYL	OmpA	0.047628	1.9	0.163718	1.94	8504.8	WB
125	BoLA-2:07001	HVDPVVRSL	HVDPVVRSL	0	0	0	0	0	HVDPVVRSL	OmpA	0.293983	0.088	0.155041	1.451	9341.94	SB
217	BoLA-2:07001	AVTGGPIAF	AVTGGPIAF	0	0	0	0	0	AVTGGPIAF	OmpA	0.175206	0.302	0.17121	1.057	7842.59	SB
136	BoLA-2:07001	SSAEPVFTA	SSAEPVFTA	0	0	0	0	0	SSAEPVFTA	OmpA	0.150227	0.414	0.175389	0.969	7495.88	SB
74	BoLA-2:07001	ASALSLSLL	ASALSLSLL	0	0	0	0	0	ASALSLSLL	OmpA	0.144051	0.448	0.249467	0.205	3363.04	SB
48	BoLA-2:07001	GAFERPQSV	GAFERPQSV	0	0	0	0	0	GAFERPQSV	OmpA	0.122999	0.589	0.117052	3.469	14091.1	WB
229	BoLA-2:07001	GASLIPADY	GASLIPADY	0	0	0	0	0	GASLIPADY	OmpA	0.104681	0.762	0.167068	1.155	8202.05	WB
164	BoLA-2:07001	GTAPSSEHK	GTAPSSEHK	0	0	0	0	0	GTAPSSEHK	OmpA	0.104357	0.766	0.131253	2.484	12084.1	WB
143	BoLA-2:07001	TASVPIPDF	TASVPIPDF	0	0	0	0	0	TASVPIPDF	OmpA	0.098795	0.827	0.155889	1.423	9256.61	WB
13	BoLA-2:07001	TTDARRTQK	TTDARRTQK	0	0	0	0	0	TTDARRTQK	OmpA	0.094471	0.877	0.123628	2.962	13123.4	WB
73	BoLA-2:07001	GASALSLSL	GASALSLSL	0	0	0	0	0	GASALSLSL	OmpA	0.084064	1.044	0.150564	1.613	9805.6	WB
55	BoLA-2:07001	SVTGPTGVL	SVTGPTGVL	0	0	0	0	0	SVTGPTGVL	OmpA	0.083541	1.054	0.162909	1.247	8579.57	WB
69	BoLA-2:07001	TSTRGASAL	TSTRGASAL	0	0	0	0	0	TSTRGASAL	OmpA	0.073813	1.251	0.168876	1.11	8043.16	WB
154	BoLA-2:07001	KVERDTVTL	KVERDTVTL	0	0	0	0	0	KVERDTVTL	OmpA	0.07247	1.283	0.110188	4.049	15177.5	WB
181	BoLA-2:07001	STWPDMKIV	STWPDMKIV	0	0	0	0	0	STWPDMKIV	OmpA	0.066144	1.454	0.140206	2.046	10968.5	WB
179	BoLA-2:07001	ATSTWPDMK	ATSTWPDMK	0	0	0	0	0	ATSTWPDMK	OmpA	0.064642	1.498	0.138286	2.14	11198.7	WB
290	BoLA-2:07001	VAGDHIATV	VAGDHIATV	0	0	0	0	0	VAGDHIATV	OmpA	0.063001	1.562	0.119857	3.249	13669.9	WB
86	BoLA-2:07001	RSGNTVTLI	RSGNTVTLI	0	0	0	0	0	RSGNTVTLI	OmpA	0.057934	1.761	0.16335	1.238	8538.73	WB
42	BoLA-2:07001	IAAIGYGAF	IAAIGYGAF	0	0	0	0	0	IAAIGYGAF	OmpA	0.0568	1.807	0.180823	0.868	7067.87	WB
54	BoLA-2:07001	QSVTGPTGV	QSVTGPTGV	0	0	0	0	0	QSVTGPTGV	OmpA	0.05261	1.979	0.121462	3.123	13434.6	WB
125	BoLA-2:07101	HVDPVVRSL	HVDPVVRSL	0	0	0	0	0	HVDPVVRSL	OmpA	0.190522	0.42	0.087015	8.073	19502.4	SB
280	BoLA-2:07101	IVADYLVAR	IVADYLVAR	0	0	0	0	0	IVADYLVAR	OmpA	0.169625	0.533	0.150337	1.512	9829.72	WB
164	BoLA-2:07101	GTAPSSEHK	GTAPSSEHK	0	0	0	0	0	GTAPSSEHK	OmpA	0.163882	0.567	0.121134	3.196	13482.3	WB
136	BoLA-2:07101	SSAEPVFTA	SSAEPVFTA	0	0	0	0	0	SSAEPVFTA	OmpA	0.141474	0.743	0.128985	2.614	12384.4	WB
48	BoLA-2:07101	GAFERPQSV	GAFERPQSV	0	0	0	0	0	GAFERPQSV	OmpA	0.120841	0.983	0.096068	6.264	17682.7	WB
181	BoLA-2:07101	STWPDMKIV	STWPDMKIV	0	0	0	0	0	STWPDMKIV	OmpA	0.118579	1.015	0.128145	2.673	12497.4	WB
217	BoLA-2:07101	AVTGGPIAF	AVTGGPIAF	0	0	0	0	0	AVTGGPIAF	OmpA	0.112201	1.103	0.083908	8.835	20169.2	WB
13	BoLA-2:07101	TTDARRTQK	TTDARRTQK	0	0	0	0	0	TTDARRTQK	OmpA	0.110452	1.132	0.119153	3.367	13774.4	WB
179	BoLA-2:07101	ATSTWPDMK	ATSTWPDMK	0	0	0	0	0	ATSTWPDMK	OmpA	0.107378	1.183	0.144424	1.741	10479.1	WB
252	BoLA-2:07101	DARVTINGY	DARVTINGY	0	0	0	0	0	DARVTINGY	OmpA	0.103563	1.253	0.107239	4.614	15669.6	WB
74	BoLA-2:07101	ASALSLSLL	ASALSLSLL	0	0	0	0	0	ASALSLSLL	OmpA	0.102215	1.279	0.149522	1.542	9916.78	WB
269	BoLA-2:07101	INIPLSAQR	INIPLSAQR	0	0	0	0	0	INIPLSAQR	OmpA	0.090609	1.52	0.114016	3.863	14561.7	WB
143	BoLA-2:07101	TASVPIPDF	TASVPIPDF	0	0	0	0	0	TASVPIPDF	OmpA	0.086346	1.641	0.1048	4.928	16088.6	WB
15	BoLA-2:07101	DARRTQKFY	DARRTQKFY	0	0	0	0	0	DARRTQKFY	OmpA	0.084851	1.689	0.108436	4.466	15467.9	WB
229	BoLA-2:07101	GASLIPADY	GASLIPADY	0	0	0	0	0	GASLIPADY	OmpA	0.081649	1.801	0.119103	3.371	13781.9	WB
33	BoLA-3:00101	IGAVVIPLL	IGAVVIPLL	0	0	0	0	0	IGAVVIPLL	OmpA	0.160956	0.099	0.169744	0.096	7967.98	SB
24	BoLA-3:00101	RGSPGRPWL	RGSPGRPWL	0	0	0	0	0	RGSPGRPWL	OmpA	0.099377	0.24	0.130645	0.299	12163.9	SB
25	BoLA-3:00101	GSPGRPWLI	GSPGRPWLI	0	0	0	0	0	GSPGRPWLI	OmpA	0.094841	0.262	0.108725	0.609	15419.6	SB
74	BoLA-3:00101	ASALSLSLL	ASALSLSLL	0	0	0	0	0	ASALSLSLL	OmpA	0.069051	0.48	0.126134	0.349	12772.3	SB
145	BoLA-3:00101	SVPIPDFGL	SVPIPDFGL	0	0	0	0	0	SVPIPDFGL	OmpA	0.066797	0.51	0.093204	1.042	18239.3	WB
85	BoLA-3:00101	SRSGNTVTL	SRSGNTVTL	0	0	0	0	0	SRSGNTVTL	OmpA	0.061672	0.581	0.075502	1.989	22089.6	WB
290	BoLA-3:00101	VAGDHIATV	VAGDHIATV	0	0	0	0	0	VAGDHIATV	OmpA	0.05511	0.675	0.075527	1.987	22083.7	WB
249	BoLA-3:00101	ACPDARVTI	ACPDARVTI	0	0	0	0	0	ACPDARVTI	OmpA	0.052622	0.717	0.089526	1.186	18979.7	WB
48	BoLA-3:00101	GAFERPQSV	GAFERPQSV	0	0	0	0	0	GAFERPQSV	OmpA	0.049703	0.781	0.054659	4.852	27677.6	WB
73	BoLA-3:00101	GASALSLSL	GASALSLSL	0	0	0	0	0	GASALSLSL	OmpA	0.048874	0.799	0.088916	1.211	19105.4	WB
102	BoLA-3:00101	AKAALMTAL	AKAALMTAL	0	0	0	0	0	AKAALMTAL	OmpA	0.047188	0.84	0.093107	1.047	18258.4	WB
277	BoLA-3:00101	RAKIVADYL	RAKIVADYL	0	0	0	0	0	RAKIVADYL	OmpA	0.04373	0.943	0.074292	2.094	22380.7	WB
125	BoLA-3:00101	HVDPVVRSL	HVDPVVRSL	0	0	0	0	0	HVDPVVRSL	OmpA	0.042247	1.005	0.041372	9.166	31956.9	WB
37	BoLA-3:00101	VIPLLIAAI	VIPLLIAAI	0	0	0	0	0	VIPLLIAAI	OmpA	0.040652	1.054	0.104603	0.689	16122.9	WB
298	BoLA-3:00101	VGLGSVNPI	VGLGSVNPI	0	0	0	0	0	VGLGSVNPI	OmpA	0.037418	1.172	0.13639	0.253	11430.8	WB
69	BoLA-3:00101	TSTRGASAL	TSTRGASAL	0	0	0	0	0	TSTRGASAL	OmpA	0.037089	1.185	0.096819	0.907	17539.6	WB
315	BoLA-3:00101	RAKNRRVEI	RAKNRRVEI	0	0	0	0	0	RAKNRRVEI	OmpA	0.031098	1.503	0.056106	4.535	27247.7	WB
138	BoLA-3:00101	AEPVFTASV	AEPVFTASV	0	0	0	0	0	AEPVFTASV	OmpA	0.02991	1.575	0.080459	1.642	20936.1	WB
225	BoLA-3:00101	FGNDGASLI	FGNDGASLI	0	0	0	0	0	FGNDGASLI	OmpA	0.02957	1.595	0.094687	0.983	17948.9	WB
232	BoLA-3:00101	LIPADYEIL	LIPADYEIL	0	0	0	0	0	LIPADYEIL	OmpA	0.02887	1.656	0.074888	2.041	22236.9	WB
58	BoLA-3:00101	GPTGVLPTL	GPTGVLPTL	0	0	0	0	0	GPTGVLPTL	OmpA	0.027296	1.779	0.046414	7.131	30260.2	WB
57	BoLA-3:00101	TGPTGVLPT	TGPTGVLPT	0	0	0	0	0	TGPTGVLPT	OmpA	0.02698	1.802	0.10553	0.671	15962	WB
136	BoLA-3:00101	SSAEPVFTA	SSAEPVFTA	0	0	0	0	0	SSAEPVFTA	OmpA	0.024618	1.998	0.06205	3.486	25550.5	WB
33	BoLA-3:00102	IGAVVIPLL	IGAVVIPLL	0	0	0	0	0	IGAVVIPLL	OmpA	0.112261	0.12	0.140195	0.116	10969.8	SB
25	BoLA-3:00102	GSPGRPWLI	GSPGRPWLI	0	0	0	0	0	GSPGRPWLI	OmpA	0.086381	0.205	0.102355	0.423	16519.9	SB
85	BoLA-3:00102	SRSGNTVTL	SRSGNTVTL	0	0	0	0	0	SRSGNTVTL	OmpA	0.081618	0.23	0.083763	0.92	20200.9	SB
24	BoLA-3:00102	RGSPGRPWL	RGSPGRPWL	0	0	0	0	0	RGSPGRPWL	OmpA	0.081095	0.232	0.114845	0.256	14431.7	SB
249	BoLA-3:00102	ACPDARVTI	ACPDARVTI	0	0	0	0	0	ACPDARVTI	OmpA	0.060325	0.4	0.089516	0.722	18981.8	SB
145	BoLA-3:00102	SVPIPDFGL	SVPIPDFGL	0	0	0	0	0	SVPIPDFGL	OmpA	0.055834	0.472	0.086935	0.807	19519.3	SB
74	BoLA-3:00102	ASALSLSLL	ASALSLSLL	0	0	0	0	0	ASALSLSLL	OmpA	0.053012	0.516	0.115861	0.247	14273.9	WB
102	BoLA-3:00102	AKAALMTAL	AKAALMTAL	0	0	0	0	0	AKAALMTAL	OmpA	0.048661	0.582	0.095904	0.549	17714.1	WB
48	BoLA-3:00102	GAFERPQSV	GAFERPQSV	0	0	0	0	0	GAFERPQSV	OmpA	0.04638	0.624	0.05279	3.789	28243	WB
277	BoLA-3:00102	RAKIVADYL	RAKIVADYL	0	0	0	0	0	RAKIVADYL	OmpA	0.043936	0.681	0.068277	1.78	23885.7	WB
125	BoLA-3:00102	HVDPVVRSL	HVDPVVRSL	0	0	0	0	0	HVDPVVRSL	OmpA	0.041158	0.747	0.04207	6.706	31716.4	WB
73	BoLA-3:00102	GASALSLSL	GASALSLSL	0	0	0	0	0	GASALSLSL	OmpA	0.03873	0.809	0.07639	1.254	21878.4	WB
69	BoLA-3:00102	TSTRGASAL	TSTRGASAL	0	0	0	0	0	TSTRGASAL	OmpA	0.034038	0.984	0.088288	0.762	19235.7	WB
138	BoLA-3:00102	AEPVFTASV	AEPVFTASV	0	0	0	0	0	AEPVFTASV	OmpA	0.031531	1.09	0.080353	1.071	20960.1	WB
315	BoLA-3:00102	RAKNRRVEI	RAKNRRVEI	0	0	0	0	0	RAKNRRVEI	OmpA	0.031362	1.097	0.058437	2.834	26569.1	WB
290	BoLA-3:00102	VAGDHIATV	VAGDHIATV	0	0	0	0	0	VAGDHIATV	OmpA	0.030986	1.116	0.065374	2.026	24647.9	WB
37	BoLA-3:00102	VIPLLIAAI	VIPLLIAAI	0	0	0	0	0	VIPLLIAAI	OmpA	0.028053	1.281	0.094052	0.592	18072.7	WB
225	BoLA-3:00102	FGNDGASLI	FGNDGASLI	0	0	0	0	0	FGNDGASLI	OmpA	0.027683	1.304	0.083376	0.936	20285.6	WB
298	BoLA-3:00102	VGLGSVNPI	VGLGSVNPI	0	0	0	0	0	VGLGSVNPI	OmpA	0.026549	1.368	0.112416	0.284	14816	WB
33	BoLA-3:00103	IGAVVIPLL	IGAVVIPLL	0	0	0	0	0	IGAVVIPLL	OmpA	0.117363	0.195	0.147266	0.166	10161.8	SB
125	BoLA-3:00103	HVDPVVRSL	HVDPVVRSL	0	0	0	0	0	HVDPVVRSL	OmpA	0.114142	0.205	0.068043	2.708	23946.3	SB
145	BoLA-3:00103	SVPIPDFGL	SVPIPDFGL	0	0	0	0	0	SVPIPDFGL	OmpA	0.107412	0.234	0.12182	0.387	13382.6	SB
37	BoLA-3:00103	VIPLLIAAI	VIPLLIAAI	0	0	0	0	0	VIPLLIAAI	OmpA	0.105329	0.243	0.154472	0.138	9399.63	SB
25	BoLA-3:00103	GSPGRPWLI	GSPGRPWLI	0	0	0	0	0	GSPGRPWLI	OmpA	0.103544	0.251	0.118064	0.438	13937.7	SB
249	BoLA-3:00103	ACPDARVTI	ACPDARVTI	0	0	0	0	0	ACPDARVTI	OmpA	0.088146	0.351	0.103823	0.711	16259.6	SB
48	BoLA-3:00103	GAFERPQSV	GAFERPQSV	0	0	0	0	0	GAFERPQSV	OmpA	0.080891	0.399	0.067391	2.784	24115.8	SB
74	BoLA-3:00103	ASALSLSLL	ASALSLSLL	0	0	0	0	0	ASALSLSLL	OmpA	0.079163	0.417	0.143555	0.187	10578.1	SB
24	BoLA-3:00103	RGSPGRPWL	RGSPGRPWL	0	0	0	0	0	RGSPGRPWL	OmpA	0.075039	0.464	0.108762	0.599	15413.5	SB
232	BoLA-3:00103	LIPADYEIL	LIPADYEIL	0	0	0	0	0	LIPADYEIL	OmpA	0.066166	0.573	0.106992	0.638	15711.5	WB
69	BoLA-3:00103	TSTRGASAL	TSTRGASAL	0	0	0	0	0	TSTRGASAL	OmpA	0.051208	0.84	0.111558	0.548	14954.2	WB
315	BoLA-3:00103	RAKNRRVEI	RAKNRRVEI	0	0	0	0	0	RAKNRRVEI	OmpA	0.049605	0.878	0.065675	2.985	24567.7	WB
73	BoLA-3:00103	GASALSLSL	GASALSLSL	0	0	0	0	0	GASALSLSL	OmpA	0.049099	0.89	0.088996	1.222	19088.9	WB
277	BoLA-3:00103	RAKIVADYL	RAKIVADYL	0	0	0	0	0	RAKIVADYL	OmpA	0.04889	0.894	0.079862	1.733	21071.8	WB
231	BoLA-3:00103	SLIPADYEI	SLIPADYEI	0	0	0	0	0	SLIPADYEI	OmpA	0.048608	0.901	0.083647	1.503	20226.2	WB
55	BoLA-3:00103	SVTGPTGVL	SVTGPTGVL	0	0	0	0	0	SVTGPTGVL	OmpA	0.048528	0.904	0.088844	1.229	19120.3	WB
290	BoLA-3:00103	VAGDHIATV	VAGDHIATV	0	0	0	0	0	VAGDHIATV	OmpA	0.044826	1.019	0.077638	1.868	21585	WB
154	BoLA-3:00103	KVERDTVTL	KVERDTVTL	0	0	0	0	0	KVERDTVTL	OmpA	0.039385	1.217	0.061231	3.628	25777.9	WB
58	BoLA-3:00103	GPTGVLPTL	GPTGVLPTL	0	0	0	0	0	GPTGVLPTL	OmpA	0.037605	1.283	0.046073	7.174	30372.1	WB
225	BoLA-3:00103	FGNDGASLI	FGNDGASLI	0	0	0	0	0	FGNDGASLI	OmpA	0.036484	1.332	0.095153	0.982	17858.7	WB
105	BoLA-3:00103	ALMTALNGL	ALMTALNGL	0	0	0	0	0	ALMTALNGL	OmpA	0.032479	1.538	0.094631	1	17959.8	WB
85	BoLA-3:00103	SRSGNTVTL	SRSGNTVTL	0	0	0	0	0	SRSGNTVTL	OmpA	0.032182	1.555	0.06801	2.712	23954.8	WB
102	BoLA-3:00103	AKAALMTAL	AKAALMTAL	0	0	0	0	0	AKAALMTAL	OmpA	0.028423	1.793	0.078034	1.846	21492.7	WB
298	BoLA-3:00103	VGLGSVNPI	VGLGSVNPI	0	0	0	0	0	VGLGSVNPI	OmpA	0.026373	1.964	0.124741	0.358	12966.3	WB
164	BoLA-2:03202	GTAPSSEHK	GTAPSSEHK	0	0	0	0	0	GTAPSSEHK	OmpA	0.271574	0.211	0.227767	1.498	4253.04	SB
280	BoLA-2:03202	IVADYLVAR	IVADYLVAR	0	0	0	0	0	IVADYLVAR	OmpA	0.23955	0.298	0.236687	1.293	3861.76	SB
48	BoLA-2:03202	GAFERPQSV	GAFERPQSV	0	0	0	0	0	GAFERPQSV	OmpA	0.170444	0.604	0.165713	4.477	8323.18	WB
136	BoLA-2:03202	SSAEPVFTA	SSAEPVFTA	0	0	0	0	0	SSAEPVFTA	OmpA	0.168826	0.616	0.19819	2.523	5857.08	WB
125	BoLA-2:03202	HVDPVVRSL	HVDPVVRSL	0	0	0	0	0	HVDPVVRSL	OmpA	0.156704	0.705	0.106837	13.176	15737.9	WB
179	BoLA-2:03202	ATSTWPDMK	ATSTWPDMK	0	0	0	0	0	ATSTWPDMK	OmpA	0.156251	0.708	0.227215	1.511	4278.52	WB
13	BoLA-2:03202	TTDARRTQK	TTDARRTQK	0	0	0	0	0	TTDARRTQK	OmpA	0.154926	0.719	0.171788	4.012	7793.7	WB
269	BoLA-2:03202	INIPLSAQR	INIPLSAQR	0	0	0	0	0	INIPLSAQR	OmpA	0.126386	0.988	0.16104	4.875	8754.83	WB
307	BoLA-2:03202	ASNATPEGR	ASNATPEGR	0	0	0	0	0	ASNATPEGR	OmpA	0.124651	1.01	0.165964	4.457	8300.61	WB
181	BoLA-2:03202	STWPDMKIV	STWPDMKIV	0	0	0	0	0	STWPDMKIV	OmpA	0.116247	1.133	0.183022	3.294	6901.68	WB
217	BoLA-2:03202	AVTGGPIAF	AVTGGPIAF	0	0	0	0	0	AVTGGPIAF	OmpA	0.10476	1.333	0.127298	8.956	12612.5	WB
74	BoLA-2:03202	ASALSLSLL	ASALSLSLL	0	0	0	0	0	ASALSLSLL	OmpA	0.094798	1.546	0.213374	1.912	4969.72	WB
36	BoLA-2:03202	VVIPLLIAA	VVIPLLIAA	0	0	0	0	0	VVIPLLIAA	OmpA	0.081585	1.894	0.165468	4.495	8345.28	WB
276	BoLA-2:04301	QRAKIVADY	QRAKIVADY	0	0	0	0	0	QRAKIVADY	OmpA	0.125615	0.72	0.164378	2.034	8444.28	WB
229	BoLA-2:04301	GASLIPADY	GASLIPADY	0	0	0	0	0	GASLIPADY	OmpA	0.113883	0.881	0.164124	2.047	8467.52	WB
125	BoLA-2:04301	HVDPVVRSL	HVDPVVRSL	0	0	0	0	0	HVDPVVRSL	OmpA	0.108725	0.967	0.066218	21.206	24423.8	WB
14	BoLA-2:04301	TDARRTQKF	TDARRTQKF	0	0	0	0	0	TDARRTQKF	OmpA	0.095123	1.23	0.088865	11.707	19116	WB
33	BoLA-2:04301	IGAVVIPLL	IGAVVIPLL	0	0	0	0	0	IGAVVIPLL	OmpA	0.09339	1.272	0.212528	0.708	5015.42	WB
143	BoLA-2:04301	TASVPIPDF	TASVPIPDF	0	0	0	0	0	TASVPIPDF	OmpA	0.091782	1.311	0.132463	4.146	11927	WB
252	BoLA-2:04301	DARVTINGY	DARVTINGY	0	0	0	0	0	DARVTINGY	OmpA	0.086263	1.46	0.102182	8.406	16550.8	WB
85	BoLA-2:04301	SRSGNTVTL	SRSGNTVTL	0	0	0	0	0	SRSGNTVTL	OmpA	0.084514	1.508	0.11081	6.873	15075.7	WB
217	BoLA-2:04301	AVTGGPIAF	AVTGGPIAF	0	0	0	0	0	AVTGGPIAF	OmpA	0.081406	1.594	0.107779	7.369	15578.3	WB
15	BoLA-2:04301	DARRTQKFY	DARRTQKFY	0	0	0	0	0	DARRTQKFY	OmpA	0.080897	1.609	0.103239	8.2	16362.6	WB
175	BoLA-2:04301	VKRAATSTW	VKRAATSTW	0	0	0	0	0	VKRAATSTW	OmpA	0.077407	1.715	0.121123	5.41	13483.9	WB
269	BoLA-2:04301	INIPLSAQR	INIPLSAQR	0	0	0	0	0	INIPLSAQR	OmpA	0.072203	1.898	0.132245	4.168	11955.1	WB
125	BoLA-2:04401	HVDPVVRSL	HVDPVVRSL	0	0	0	0	0	HVDPVVRSL	OmpA	0.368271	0.441	0.141008	7.801	10873.7	SB
217	BoLA-2:04401	AVTGGPIAF	AVTGGPIAF	0	0	0	0	0	AVTGGPIAF	OmpA	0.290435	0.855	0.163485	5.019	8526.27	WB
269	BoLA-2:04401	INIPLSAQR	INIPLSAQR	0	0	0	0	0	INIPLSAQR	OmpA	0.279072	0.95	0.205272	2.28	5425.04	WB
229	BoLA-2:04401	GASLIPADY	GASLIPADY	0	0	0	0	0	GASLIPADY	OmpA	0.269045	1.04	0.208053	2.169	5264.23	WB
143	BoLA-2:04401	TASVPIPDF	TASVPIPDF	0	0	0	0	0	TASVPIPDF	OmpA	0.25254	1.194	0.176976	3.853	7368.27	WB
280	BoLA-2:04401	IVADYLVAR	IVADYLVAR	0	0	0	0	0	IVADYLVAR	OmpA	0.236436	1.387	0.187778	3.142	6555.52	WB
164	BoLA-2:04401	GTAPSSEHK	GTAPSSEHK	0	0	0	0	0	GTAPSSEHK	OmpA	0.210284	1.767	0.156211	5.804	9224.42	WB
74	BoLA-2:04401	ASALSLSLL	ASALSLSLL	0	0	0	0	0	ASALSLSLL	OmpA	0.203221	1.886	0.196328	2.679	5976.28	WB
125	BoLA-2:04402	HVDPVVRSL	HVDPVVRSL	0	0	0	0	0	HVDPVVRSL	OmpA	0.20006	0.343	0.10229	7.918	16531.5	SB
217	BoLA-2:04402	AVTGGPIAF	AVTGGPIAF	0	0	0	0	0	AVTGGPIAF	OmpA	0.190795	0.385	0.155156	2.397	9330.32	SB
143	BoLA-2:04402	TASVPIPDF	TASVPIPDF	0	0	0	0	0	TASVPIPDF	OmpA	0.142	0.684	0.176494	1.499	7406.79	WB
48	BoLA-2:04402	GAFERPQSV	GAFERPQSV	0	0	0	0	0	GAFERPQSV	OmpA	0.122451	0.909	0.11463	5.916	14465.3	WB
229	BoLA-2:04402	GASLIPADY	GASLIPADY	0	0	0	0	0	GASLIPADY	OmpA	0.11013	1.117	0.164921	1.919	8394.82	WB
74	BoLA-2:04402	ASALSLSLL	ASALSLSLL	0	0	0	0	0	ASALSLSLL	OmpA	0.101054	1.291	0.178803	1.434	7224.04	WB
136	BoLA-2:04402	SSAEPVFTA	SSAEPVFTA	0	0	0	0	0	SSAEPVFTA	OmpA	0.097152	1.375	0.157039	2.304	9142.15	WB
73	BoLA-2:04402	GASALSLSL	GASALSLSL	0	0	0	0	0	GASALSLSL	OmpA	0.086818	1.629	0.160491	2.133	8806.99	WB
277	BoLA-2:04402	RAKIVADYL	RAKIVADYL	0	0	0	0	0	RAKIVADYL	OmpA	0.08333	1.724	0.162739	2.021	8595.37	WB
269	BoLA-2:04402	INIPLSAQR	INIPLSAQR	0	0	0	0	0	INIPLSAQR	OmpA	0.080723	1.801	0.116391	5.673	14192.3	WB
164	BoLA-2:04501	GTAPSSEHK	GTAPSSEHK	0	0	0	0	0	GTAPSSEHK	OmpA	0.332166	0.238	0.198487	1.351	5838.29	SB
125	BoLA-2:04501	HVDPVVRSL	HVDPVVRSL	0	0	0	0	0	HVDPVVRSL	OmpA	0.263504	0.425	0.118277	7.381	13905.6	SB
280	BoLA-2:04501	IVADYLVAR	IVADYLVAR	0	0	0	0	0	IVADYLVAR	OmpA	0.260189	0.438	0.190404	1.582	6371.88	SB
13	BoLA-2:04501	TTDARRTQK	TTDARRTQK	0	0	0	0	0	TTDARRTQK	OmpA	0.193401	0.806	0.158742	3.096	8975.24	WB
217	BoLA-2:04501	AVTGGPIAF	AVTGGPIAF	0	0	0	0	0	AVTGGPIAF	OmpA	0.175657	0.959	0.126554	6.167	12714.4	WB
179	BoLA-2:04501	ATSTWPDMK	ATSTWPDMK	0	0	0	0	0	ATSTWPDMK	OmpA	0.172955	0.983	0.19074	1.572	6348.75	WB
229	BoLA-2:04501	GASLIPADY	GASLIPADY	0	0	0	0	0	GASLIPADY	OmpA	0.159693	1.139	0.179325	1.988	7183.35	WB
269	BoLA-2:04501	INIPLSAQR	INIPLSAQR	0	0	0	0	0	INIPLSAQR	OmpA	0.153793	1.21	0.141966	4.444	10761.6	WB
48	BoLA-2:04501	GAFERPQSV	GAFERPQSV	0	0	0	0	0	GAFERPQSV	OmpA	0.145784	1.309	0.125046	6.374	12923.6	WB
136	BoLA-2:04501	SSAEPVFTA	SSAEPVFTA	0	0	0	0	0	SSAEPVFTA	OmpA	0.141295	1.381	0.152908	3.526	9560.05	WB
307	BoLA-2:04501	ASNATPEGR	ASNATPEGR	0	0	0	0	0	ASNATPEGR	OmpA	0.139091	1.418	0.144903	4.19	10425	WB
64	BoLA-2:04501	PTLTPTSTR	PTLTPTSTR	0	0	0	0	0	PTLTPTSTR	OmpA	0.133149	1.524	0.12774	6.005	12552.3	WB
181	BoLA-2:04501	STWPDMKIV	STWPDMKIV	0	0	0	0	0	STWPDMKIV	OmpA	0.123722	1.714	0.149016	3.844	9971.22	WB
74	BoLA-2:04501	ASALSLSLL	ASALSLSLL	0	0	0	0	0	ASALSLSLL	OmpA	0.122858	1.732	0.204192	1.192	5488.81	WB
309	BoLA-2:04501	NATPEGRAK	NATPEGRAK	0	0	0	0	0	NATPEGRAK	OmpA	0.116235	1.87	0.105066	9.96	16042.4	WB
143	BoLA-2:04501	TASVPIPDF	TASVPIPDF	0	0	0	0	0	TASVPIPDF	OmpA	0.115953	1.876	0.141312	4.501	10838	WB
252	BoLA-2:04501	DARVTINGY	DARVTINGY	0	0	0	0	0	DARVTINGY	OmpA	0.112739	1.948	0.119254	7.223	13759.4	WB
48	BoLA-2:04601	GAFERPQSV	GAFERPQSV	0	0	0	0	0	GAFERPQSV	OmpA	0.175508	0.594	0.153761	6.602	9472.21	WB
276	BoLA-2:04601	QRAKIVADY	QRAKIVADY	0	0	0	0	0	QRAKIVADY	OmpA	0.145449	0.872	0.206605	2.251	5347.36	WB
85	BoLA-2:04601	SRSGNTVTL	SRSGNTVTL	0	0	0	0	0	SRSGNTVTL	OmpA	0.143954	0.889	0.169322	4.774	8004.44	WB
125	BoLA-2:04601	HVDPVVRSL	HVDPVVRSL	0	0	0	0	0	HVDPVVRSL	OmpA	0.141106	0.924	0.100809	20.088	16798.5	WB
217	BoLA-2:04601	AVTGGPIAF	AVTGGPIAF	0	0	0	0	0	AVTGGPIAF	OmpA	0.137321	0.97	0.16298	5.427	8572.98	WB
74	BoLA-2:04601	ASALSLSLL	ASALSLSLL	0	0	0	0	0	ASALSLSLL	OmpA	0.13141	1.051	0.240282	1.162	3714.43	WB
33	BoLA-2:04601	IGAVVIPLL	IGAVVIPLL	0	0	0	0	0	IGAVVIPLL	OmpA	0.127315	1.116	0.280925	0.535	2392.83	WB
175	BoLA-2:04601	VKRAATSTW	VKRAATSTW	0	0	0	0	0	VKRAATSTW	OmpA	0.126303	1.136	0.213351	1.959	4970.96	WB
24	BoLA-2:04601	RGSPGRPWL	RGSPGRPWL	0	0	0	0	0	RGSPGRPWL	OmpA	0.118827	1.281	0.239143	1.184	3760.49	WB
229	BoLA-2:04601	GASLIPADY	GASLIPADY	0	0	0	0	0	GASLIPADY	OmpA	0.104971	1.59	0.175501	4.237	7486.8	WB
163	BoLA-2:04601	TGTAPSSEH	TGTAPSSEH	0	0	0	0	0	TGTAPSSEH	OmpA	0.1021	1.661	0.178038	4.041	7284.08	WB
269	BoLA-2:04601	INIPLSAQR	INIPLSAQR	0	0	0	0	0	INIPLSAQR	OmpA	0.100888	1.692	0.184383	3.555	6800.79	WB
277	BoLA-2:04601	RAKIVADYL	RAKIVADYL	0	0	0	0	0	RAKIVADYL	OmpA	0.099963	1.716	0.204145	2.359	5491.6	WB
42	BoLA-2:04601	IAAIGYGAF	IAAIGYGAF	0	0	0	0	0	IAAIGYGAF	OmpA	0.093754	1.89	0.251392	0.939	3293.72	WB
136	BoLA-2:04601	SSAEPVFTA	SSAEPVFTA	0	0	0	0	0	SSAEPVFTA	OmpA	0.091357	1.977	0.170959	4.611	7863.92	WB
85	BoLA-2:04701	SRSGNTVTL	SRSGNTVTL	0	0	0	0	0	SRSGNTVTL	OmpA	0.242042	0.256	0.263932	1.923	2875.82	SB
24	BoLA-2:04701	RGSPGRPWL	RGSPGRPWL	0	0	0	0	0	RGSPGRPWL	OmpA	0.241322	0.259	0.392349	0.127	716.69	SB
48	BoLA-2:04701	GAFERPQSV	GAFERPQSV	0	0	0	0	0	GAFERPQSV	OmpA	0.208528	0.398	0.198594	6.591	5831.53	SB
276	BoLA-2:04701	QRAKIVADY	QRAKIVADY	0	0	0	0	0	QRAKIVADY	OmpA	0.180993	0.596	0.25266	2.384	3248.84	WB
175	BoLA-2:04701	VKRAATSTW	VKRAATSTW	0	0	0	0	0	VKRAATSTW	OmpA	0.178367	0.617	0.286443	1.214	2254.15	WB
125	BoLA-2:04701	HVDPVVRSL	HVDPVVRSL	0	0	0	0	0	HVDPVVRSL	OmpA	0.177585	0.624	0.140648	18.663	10916.1	WB
315	BoLA-2:04701	RAKNRRVEI	RAKNRRVEI	0	0	0	0	0	RAKNRRVEI	OmpA	0.164242	0.748	0.300077	0.929	1944.99	WB
269	BoLA-2:04701	INIPLSAQR	INIPLSAQR	0	0	0	0	0	INIPLSAQR	OmpA	0.140582	1.045	0.237592	3.183	3824.13	WB
102	BoLA-2:04701	AKAALMTAL	AKAALMTAL	0	0	0	0	0	AKAALMTAL	OmpA	0.133781	1.154	0.264757	1.891	2850.26	WB
217	BoLA-2:04701	AVTGGPIAF	AVTGGPIAF	0	0	0	0	0	AVTGGPIAF	OmpA	0.129247	1.236	0.165833	11.922	8312.39	WB
136	BoLA-2:04701	SSAEPVFTA	SSAEPVFTA	0	0	0	0	0	SSAEPVFTA	OmpA	0.126836	1.28	0.24694	2.656	3456.26	WB
74	BoLA-2:04701	ASALSLSLL	ASALSLSLL	0	0	0	0	0	ASALSLSLL	OmpA	0.126736	1.282	0.311484	0.732	1719.16	WB
277	BoLA-2:04701	RAKIVADYL	RAKIVADYL	0	0	0	0	0	RAKIVADYL	OmpA	0.121784	1.381	0.308026	0.79	1784.7	WB
86	BoLA-2:04701	RSGNTVTLI	RSGNTVTLI	0	0	0	0	0	RSGNTVTLI	OmpA	0.110282	1.625	0.359165	0.28	1026.28	WB
33	BoLA-2:04701	IGAVVIPLL	IGAVVIPLL	0	0	0	0	0	IGAVVIPLL	OmpA	0.104987	1.783	0.301181	0.908	1921.9	WB
71	BoLA-2:04701	TRGASALSL	TRGASALSL	0	0	0	0	0	TRGASALSL	OmpA	0.103238	1.833	0.214988	4.871	4883.69	WB
276	BoLA-2:04801	QRAKIVADY	QRAKIVADY	0	0	0	0	0	QRAKIVADY	OmpA	0.586263	0.12	0.373886	0.219	875.17	SB
23	BoLA-2:04801	YRGSPGRPW	YRGSPGRPW	0	0	0	0	0	YRGSPGRPW	OmpA	0.515445	0.173	0.35122	0.283	1118.4	SB
85	BoLA-2:04801	SRSGNTVTL	SRSGNTVTL	0	0	0	0	0	SRSGNTVTL	OmpA	0.482857	0.204	0.32421	0.395	1498.02	SB
175	BoLA-2:04801	VKRAATSTW	VKRAATSTW	0	0	0	0	0	VKRAATSTW	OmpA	0.278226	0.52	0.258914	0.875	3036.27	WB
71	BoLA-2:04801	TRGASALSL	TRGASALSL	0	0	0	0	0	TRGASALSL	OmpA	0.248744	0.605	0.25787	0.887	3070.77	WB
125	BoLA-2:04801	HVDPVVRSL	HVDPVVRSL	0	0	0	0	0	HVDPVVRSL	OmpA	0.090311	1.869	0.113455	7.756	14650.4	WB
102	BoLA-2:04801	AKAALMTAL	AKAALMTAL	0	0	0	0	0	AKAALMTAL	OmpA	0.086942	1.933	0.196782	1.972	5946.99	WB
48	BoLA-2:05401	GAFERPQSV	GAFERPQSV	0	0	0	0	0	GAFERPQSV	OmpA	0.105967	0.024	0.071204	0.995	23141.1	SB
25	BoLA-2:05401	GSPGRPWLI	GSPGRPWLI	0	0	0	0	0	GSPGRPWLI	OmpA	0.085447	0.044	0.115577	0.123	14317.8	SB
125	BoLA-2:05401	HVDPVVRSL	HVDPVVRSL	0	0	0	0	0	HVDPVVRSL	OmpA	0.078961	0.056	0.050169	2.998	29055.4	SB
136	BoLA-2:05401	SSAEPVFTA	SSAEPVFTA	0	0	0	0	0	SSAEPVFTA	OmpA	0.077712	0.058	0.120654	0.096	13552.5	SB
86	BoLA-2:05401	RSGNTVTLI	RSGNTVTLI	0	0	0	0	0	RSGNTVTLI	OmpA	0.064877	0.096	0.17119	0.012	7844.28	SB
74	BoLA-2:05401	ASALSLSLL	ASALSLSLL	0	0	0	0	0	ASALSLSLL	OmpA	0.059624	0.124	0.128102	0.069	12503.2	SB
235	BoLA-2:05401	ADYEILNRV	ADYEILNRV	0	0	0	0	0	ADYEILNRV	OmpA	0.038234	0.295	0.060621	1.693	25948.6	SB
290	BoLA-2:05401	VAGDHIATV	VAGDHIATV	0	0	0	0	0	VAGDHIATV	OmpA	0.037951	0.299	0.069607	1.073	23544.5	SB
154	BoLA-2:05401	KVERDTVTL	KVERDTVTL	0	0	0	0	0	KVERDTVTL	OmpA	0.03267	0.392	0.048592	3.282	29555.5	SB
55	BoLA-2:05401	SVTGPTGVL	SVTGPTGVL	0	0	0	0	0	SVTGPTGVL	OmpA	0.029204	0.47	0.064621	1.389	24849.5	SB
181	BoLA-2:05401	STWPDMKIV	STWPDMKIV	0	0	0	0	0	STWPDMKIV	OmpA	0.026257	0.551	0.064484	1.399	24886.4	WB
180	BoLA-2:05401	TSTWPDMKI	TSTWPDMKI	0	0	0	0	0	TSTWPDMKI	OmpA	0.025001	0.589	0.092767	0.354	18325.7	WB
73	BoLA-2:05401	GASALSLSL	GASALSLSL	0	0	0	0	0	GASALSLSL	OmpA	0.0221	0.69	0.073842	0.871	22490	WB
231	BoLA-2:05401	SLIPADYEI	SLIPADYEI	0	0	0	0	0	SLIPADYEI	OmpA	0.01937	0.827	0.084001	0.536	20148.9	WB
83	BoLA-2:05401	SISRSGNTV	SISRSGNTV	0	0	0	0	0	SISRSGNTV	OmpA	0.01759	0.95	0.072145	0.949	22906.7	WB
217	BoLA-2:05401	AVTGGPIAF	AVTGGPIAF	0	0	0	0	0	AVTGGPIAF	OmpA	0.017285	0.971	0.038638	5.841	32916.3	WB
249	BoLA-2:05401	ACPDARVTI	ACPDARVTI	0	0	0	0	0	ACPDARVTI	OmpA	0.01672	1.013	0.03349	8.055	34801.8	WB
138	BoLA-2:05401	AEPVFTASV	AEPVFTASV	0	0	0	0	0	AEPVFTASV	OmpA	0.016447	1.036	0.053892	2.438	27908.3	WB
69	BoLA-2:05401	TSTRGASAL	TSTRGASAL	0	0	0	0	0	TSTRGASAL	OmpA	0.015542	1.117	0.066535	1.258	24340.2	WB
54	BoLA-2:05401	QSVTGPTGV	QSVTGPTGV	0	0	0	0	0	QSVTGPTGV	OmpA	0.014984	1.177	0.054996	2.303	27576.9	WB
56	BoLA-2:05401	VTGPTGVLP	VTGPTGVLP	0	0	0	0	0	VTGPTGVLP	OmpA	0.01483	1.193	0.04112	5.034	32044.1	WB
145	BoLA-2:05401	SVPIPDFGL	SVPIPDFGL	0	0	0	0	0	SVPIPDFGL	OmpA	0.013534	1.328	0.039259	5.627	32695.9	WB
263	BoLA-2:05401	NTGSEGINI	NTGSEGINI	0	0	0	0	0	NTGSEGINI	OmpA	0.012696	1.429	0.055801	2.203	27337.8	WB
277	BoLA-2:05401	RAKIVADYL	RAKIVADYL	0	0	0	0	0	RAKIVADYL	OmpA	0.012207	1.49	0.05176	2.752	28559.5	WB
85	BoLA-2:05401	SRSGNTVTL	SRSGNTVTL	0	0	0	0	0	SRSGNTVTL	OmpA	0.012014	1.515	0.040828	5.125	32145.5	WB
315	BoLA-2:05401	RAKNRRVEI	RAKNRRVEI	0	0	0	0	0	RAKNRRVEI	OmpA	0.011131	1.64	0.047312	3.514	29967.6	WB
34	BoLA-2:05401	GAVVIPLLI	GAVVIPLLI	0	0	0	0	0	GAVVIPLLI	OmpA	0.010674	1.711	0.066803	1.242	24269.7	WB
143	BoLA-2:05401	TASVPIPDF	TASVPIPDF	0	0	0	0	0	TASVPIPDF	OmpA	0.01017	1.799	0.040238	5.309	32351.4	WB
273	BoLA-2:05401	LSAQRAKIV	LSAQRAKIV	0	0	0	0	0	LSAQRAKIV	OmpA	0.009561	1.913	0.049555	3.108	29249.1	WB
276	BoLA-2:05501	QRAKIVADY	QRAKIVADY	0	0	0	0	0	QRAKIVADY	OmpA	0.248246	0.174	0.203136	0.554	5551.88	SB
175	BoLA-2:05501	VKRAATSTW	VKRAATSTW	0	0	0	0	0	VKRAATSTW	OmpA	0.207545	0.274	0.199192	0.617	5793.92	SB
102	BoLA-2:05501	AKAALMTAL	AKAALMTAL	0	0	0	0	0	AKAALMTAL	OmpA	0.147173	0.57	0.179778	0.999	7148.23	WB
48	BoLA-2:05501	GAFERPQSV	GAFERPQSV	0	0	0	0	0	GAFERPQSV	OmpA	0.095408	1.161	0.101321	7.847	16705.7	WB
85	BoLA-2:05501	SRSGNTVTL	SRSGNTVTL	0	0	0	0	0	SRSGNTVTL	OmpA	0.094214	1.183	0.108049	6.51	15532.9	WB
125	BoLA-2:05501	HVDPVVRSL	HVDPVVRSL	0	0	0	0	0	HVDPVVRSL	OmpA	0.085523	1.357	0.070511	19.266	23315.3	WB
16	BoLA-2:05501	ARRTQKFYR	ARRTQKFYR	0	0	0	0	0	ARRTQKFYR	OmpA	0.073979	1.691	0.127851	3.807	12537.2	WB
269	BoLA-2:05501	INIPLSAQR	INIPLSAQR	0	0	0	0	0	INIPLSAQR	OmpA	0.070382	1.805	0.111104	6.013	15027.8	WB
23	BoLA-2:05501	YRGSPGRPW	YRGSPGRPW	0	0	0	0	0	YRGSPGRPW	OmpA	0.069939	1.821	0.124964	4.118	12935	WB
169	BoLA-2:05501	SEHKDAVKR	SEHKDAVKR	0	0	0	0	0	SEHKDAVKR	OmpA	0.068495	1.874	0.077884	15.482	21527.6	WB
125	BoLA-2:05601	HVDPVVRSL	HVDPVVRSL	0	0	0	0	0	HVDPVVRSL	OmpA	0.22305	0.058	0.080186	1.342	20998	SB
48	BoLA-2:05601	GAFERPQSV	GAFERPQSV	0	0	0	0	0	GAFERPQSV	OmpA	0.198045	0.087	0.091059	0.839	18667.5	SB
136	BoLA-2:05601	SSAEPVFTA	SSAEPVFTA	0	0	0	0	0	SSAEPVFTA	OmpA	0.177998	0.126	0.112017	0.354	14880.1	SB
290	BoLA-2:05601	VAGDHIATV	VAGDHIATV	0	0	0	0	0	VAGDHIATV	OmpA	0.139135	0.249	0.110191	0.38	15177	SB
74	BoLA-2:05601	ASALSLSLL	ASALSLSLL	0	0	0	0	0	ASALSLSLL	OmpA	0.134175	0.284	0.129654	0.165	12295	SB
25	BoLA-2:05601	GSPGRPWLI	GSPGRPWLI	0	0	0	0	0	GSPGRPWLI	OmpA	0.131991	0.3	0.091537	0.821	18571.2	SB
154	BoLA-2:05601	KVERDTVTL	KVERDTVTL	0	0	0	0	0	KVERDTVTL	OmpA	0.114471	0.41	0.075938	1.634	21985.7	SB
86	BoLA-2:05601	RSGNTVTLI	RSGNTVTLI	0	0	0	0	0	RSGNTVTLI	OmpA	0.099124	0.542	0.126282	0.188	12751.9	WB
235	BoLA-2:05601	ADYEILNRV	ADYEILNRV	0	0	0	0	0	ADYEILNRV	OmpA	0.097655	0.561	0.074239	1.763	22393.6	WB
143	BoLA-2:05601	TASVPIPDF	TASVPIPDF	0	0	0	0	0	TASVPIPDF	OmpA	0.092852	0.625	0.081473	1.266	20707.7	WB
145	BoLA-2:05601	SVPIPDFGL	SVPIPDFGL	0	0	0	0	0	SVPIPDFGL	OmpA	0.09073	0.655	0.068932	2.265	23717	WB
180	BoLA-2:05601	TSTWPDMKI	TSTWPDMKI	0	0	0	0	0	TSTWPDMKI	OmpA	0.086429	0.719	0.10298	0.504	16408.5	WB
231	BoLA-2:05601	SLIPADYEI	SLIPADYEI	0	0	0	0	0	SLIPADYEI	OmpA	0.085953	0.726	0.10078	0.556	16803.8	WB
181	BoLA-2:05601	STWPDMKIV	STWPDMKIV	0	0	0	0	0	STWPDMKIV	OmpA	0.067928	1.067	0.071094	2.04	23168.7	WB
33	BoLA-2:05601	IGAVVIPLL	IGAVVIPLL	0	0	0	0	0	IGAVVIPLL	OmpA	0.067212	1.086	0.099782	0.579	16986.2	WB
73	BoLA-2:05601	GASALSLSL	GASALSLSL	0	0	0	0	0	GASALSLSL	OmpA	0.066062	1.117	0.087509	0.974	19398.5	WB
277	BoLA-2:05601	RAKIVADYL	RAKIVADYL	0	0	0	0	0	RAKIVADYL	OmpA	0.06271	1.207	0.082534	1.207	20471.3	WB
58	BoLA-2:05601	GPTGVLPTL	GPTGVLPTL	0	0	0	0	0	GPTGVLPTL	OmpA	0.054128	1.501	0.04622	6.981	30323.8	WB
69	BoLA-2:05601	TSTRGASAL	TSTRGASAL	0	0	0	0	0	TSTRGASAL	OmpA	0.052717	1.558	0.077261	1.538	21673.2	WB
54	BoLA-2:05601	QSVTGPTGV	QSVTGPTGV	0	0	0	0	0	QSVTGPTGV	OmpA	0.050501	1.651	0.05641	4.14	27158.2	WB
265	BoLA-2:05601	GSEGINIPL	GSEGINIPL	0	0	0	0	0	GSEGINIPL	OmpA	0.043669	1.997	0.070349	2.118	23356.2	WB
48	BoLA-2:05701	GAFERPQSV	GAFERPQSV	0	0	0	0	0	GAFERPQSV	OmpA	0.562969	0.035	0.27277	0.297	2613.56	SB
125	BoLA-2:05701	HVDPVVRSL	HVDPVVRSL	0	0	0	0	0	HVDPVVRSL	OmpA	0.526127	0.049	0.188725	1.986	6488.69	SB
231	BoLA-2:05701	SLIPADYEI	SLIPADYEI	0	0	0	0	0	SLIPADYEI	OmpA	0.327166	0.338	0.300259	0.15	1941.16	SB
290	BoLA-2:05701	VAGDHIATV	VAGDHIATV	0	0	0	0	0	VAGDHIATV	OmpA	0.251811	0.643	0.195715	1.72	6016.04	WB
105	BoLA-2:05701	ALMTALNGL	ALMTALNGL	0	0	0	0	0	ALMTALNGL	OmpA	0.234158	0.758	0.305948	0.133	1825.28	WB
277	BoLA-2:05701	RAKIVADYL	RAKIVADYL	0	0	0	0	0	RAKIVADYL	OmpA	0.225119	0.826	0.206321	1.384	5363.82	WB
315	BoLA-2:05701	RAKNRRVEI	RAKNRRVEI	0	0	0	0	0	RAKNRRVEI	OmpA	0.20444	0.985	0.162652	3.432	8603.46	WB
181	BoLA-2:05701	STWPDMKIV	STWPDMKIV	0	0	0	0	0	STWPDMKIV	OmpA	0.19455	1.082	0.18803	2.015	6537.67	WB
113	BoLA-2:05701	LLAPGVNVI	LLAPGVNVI	0	0	0	0	0	LLAPGVNVI	OmpA	0.194274	1.085	0.197196	1.668	5920.41	WB
217	BoLA-2:05701	AVTGGPIAF	AVTGGPIAF	0	0	0	0	0	AVTGGPIAF	OmpA	0.189924	1.136	0.142581	5.117	10690.2	WB
136	BoLA-2:05701	SSAEPVFTA	SSAEPVFTA	0	0	0	0	0	SSAEPVFTA	OmpA	0.172839	1.348	0.176463	2.572	7409.27	WB
73	BoLA-2:05701	GASALSLSL	GASALSLSL	0	0	0	0	0	GASALSLSL	OmpA	0.161369	1.52	0.201804	1.51	5632.47	WB
55	BoLA-2:05701	SVTGPTGVL	SVTGPTGVL	0	0	0	0	0	SVTGPTGVL	OmpA	0.156037	1.609	0.157365	3.819	9109.97	WB
239	BoLA-2:05701	ILNRVADKL	ILNRVADKL	0	0	0	0	0	ILNRVADKL	OmpA	0.144343	1.821	0.168187	3.068	8103.34	WB
48	BoLA-2:06001	GAFERPQSV	GAFERPQSV	0	0	0	0	0	GAFERPQSV	OmpA	0.176925	0.14	0.109657	0.83	15264.9	SB
125	BoLA-2:06001	HVDPVVRSL	HVDPVVRSL	0	0	0	0	0	HVDPVVRSL	OmpA	0.102861	0.47	0.056997	8.982	26986.3	SB
102	BoLA-2:06001	AKAALMTAL	AKAALMTAL	0	0	0	0	0	AKAALMTAL	OmpA	0.097952	0.51	0.140253	0.238	10962.9	WB
85	BoLA-2:06001	SRSGNTVTL	SRSGNTVTL	0	0	0	0	0	SRSGNTVTL	OmpA	0.09707	0.519	0.105237	0.957	16012.7	WB
138	BoLA-2:06001	AEPVFTASV	AEPVFTASV	0	0	0	0	0	AEPVFTASV	OmpA	0.093633	0.552	0.12501	0.433	12928.6	WB
196	BoLA-2:06001	GQAPPGPPA	GQAPPGPPA	0	0	0	0	0	GQAPPGPPA	OmpA	0.069128	0.895	0.093259	1.568	18228.4	WB
315	BoLA-2:06001	RAKNRRVEI	RAKNRRVEI	0	0	0	0	0	RAKNRRVEI	OmpA	0.050132	1.446	0.08846	1.958	19199.9	WB
58	BoLA-2:06001	GPTGVLPTL	GPTGVLPTL	0	0	0	0	0	GPTGVLPTL	OmpA	0.040697	1.95	0.056525	9.198	27124.4	WB
229	BoLA-2:06201	GASLIPADY	GASLIPADY	0	0	0	0	0	GASLIPADY	OmpA	0.352804	0.385	0.340351	0.526	1257.97	SB
217	BoLA-2:06201	AVTGGPIAF	AVTGGPIAF	0	0	0	0	0	AVTGGPIAF	OmpA	0.287058	0.61	0.219716	3.115	4640.14	WB
125	BoLA-2:06201	HVDPVVRSL	HVDPVVRSL	0	0	0	0	0	HVDPVVRSL	OmpA	0.280677	0.641	0.141482	9.894	10818.1	WB
48	BoLA-2:06201	GAFERPQSV	GAFERPQSV	0	0	0	0	0	GAFERPQSV	OmpA	0.254471	0.776	0.191697	4.667	6283.35	WB
175	BoLA-2:06201	VKRAATSTW	VKRAATSTW	0	0	0	0	0	VKRAATSTW	OmpA	0.209236	1.091	0.254787	1.888	3174.93	WB
252	BoLA-2:06201	DARVTINGY	DARVTINGY	0	0	0	0	0	DARVTINGY	OmpA	0.153434	1.754	0.160397	7.404	8815.96	WB
15	BoLA-2:06201	DARRTQKFY	DARRTQKFY	0	0	0	0	0	DARRTQKFY	OmpA	0.139177	1.991	0.157524	7.729	9094.3	WB
125	BoLA-2:06901	HVDPVVRSL	HVDPVVRSL	0	0	0	0	0	HVDPVVRSL	OmpA	0.195039	0.119	0.144002	3.06	10527.1	SB
217	BoLA-2:06901	AVTGGPIAF	AVTGGPIAF	0	0	0	0	0	AVTGGPIAF	OmpA	0.18616	0.136	0.202104	0.806	5614.22	SB
48	BoLA-2:06901	GAFERPQSV	GAFERPQSV	0	0	0	0	0	GAFERPQSV	OmpA	0.136465	0.301	0.159824	2.129	8870.78	SB
85	BoLA-2:06901	SRSGNTVTL	SRSGNTVTL	0	0	0	0	0	SRSGNTVTL	OmpA	0.102426	0.561	0.15675	2.282	9170.79	WB
73	BoLA-2:06901	GASALSLSL	GASALSLSL	0	0	0	0	0	GASALSLSL	OmpA	0.09726	0.623	0.226494	0.472	4312.03	WB
229	BoLA-2:06901	GASLIPADY	GASLIPADY	0	0	0	0	0	GASLIPADY	OmpA	0.094556	0.655	0.198155	0.884	5859.3	WB
143	BoLA-2:06901	TASVPIPDF	TASVPIPDF	0	0	0	0	0	TASVPIPDF	OmpA	0.085228	0.779	0.177679	1.425	7312.43	WB
55	BoLA-2:06901	SVTGPTGVL	SVTGPTGVL	0	0	0	0	0	SVTGPTGVL	OmpA	0.072415	1.036	0.164341	1.911	8447.67	WB
175	BoLA-2:06901	VKRAATSTW	VKRAATSTW	0	0	0	0	0	VKRAATSTW	OmpA	0.066266	1.188	0.154637	2.387	9382.87	WB
102	BoLA-2:06901	AKAALMTAL	AKAALMTAL	0	0	0	0	0	AKAALMTAL	OmpA	0.058351	1.425	0.166224	1.831	8277.29	WB
23	BoLA-2:06901	YRGSPGRPW	YRGSPGRPW	0	0	0	0	0	YRGSPGRPW	OmpA	0.056239	1.5	0.127996	4.343	12517.6	WB
276	BoLA-2:06901	QRAKIVADY	QRAKIVADY	0	0	0	0	0	QRAKIVADY	OmpA	0.056079	1.506	0.140287	3.322	10958.9	WB
74	BoLA-2:06901	ASALSLSLL	ASALSLSLL	0	0	0	0	0	ASALSLSLL	OmpA	0.05403	1.589	0.179131	1.379	7198.44	WB
69	BoLA-2:06901	TSTRGASAL	TSTRGASAL	0	0	0	0	0	TSTRGASAL	OmpA	0.048832	1.837	0.153989	2.419	9448.88	WB
277	BoLA-2:06901	RAKIVADYL	RAKIVADYL	0	0	0	0	0	RAKIVADYL	OmpA	0.047628	1.9	0.163718	1.94	8504.8	WB
125	BoLA-2:07001	HVDPVVRSL	HVDPVVRSL	0	0	0	0	0	HVDPVVRSL	OmpA	0.293983	0.088	0.155041	1.451	9341.94	SB
217	BoLA-2:07001	AVTGGPIAF	AVTGGPIAF	0	0	0	0	0	AVTGGPIAF	OmpA	0.175206	0.302	0.17121	1.057	7842.59	SB
136	BoLA-2:07001	SSAEPVFTA	SSAEPVFTA	0	0	0	0	0	SSAEPVFTA	OmpA	0.150227	0.414	0.175389	0.969	7495.88	SB
74	BoLA-2:07001	ASALSLSLL	ASALSLSLL	0	0	0	0	0	ASALSLSLL	OmpA	0.144051	0.448	0.249467	0.205	3363.04	SB
48	BoLA-2:07001	GAFERPQSV	GAFERPQSV	0	0	0	0	0	GAFERPQSV	OmpA	0.122999	0.589	0.117052	3.469	14091.1	WB
229	BoLA-2:07001	GASLIPADY	GASLIPADY	0	0	0	0	0	GASLIPADY	OmpA	0.104681	0.762	0.167068	1.155	8202.05	WB
164	BoLA-2:07001	GTAPSSEHK	GTAPSSEHK	0	0	0	0	0	GTAPSSEHK	OmpA	0.104357	0.766	0.131253	2.484	12084.1	WB
143	BoLA-2:07001	TASVPIPDF	TASVPIPDF	0	0	0	0	0	TASVPIPDF	OmpA	0.098795	0.827	0.155889	1.423	9256.61	WB
13	BoLA-2:07001	TTDARRTQK	TTDARRTQK	0	0	0	0	0	TTDARRTQK	OmpA	0.094471	0.877	0.123628	2.962	13123.4	WB
73	BoLA-2:07001	GASALSLSL	GASALSLSL	0	0	0	0	0	GASALSLSL	OmpA	0.084064	1.044	0.150564	1.613	9805.6	WB
55	BoLA-2:07001	SVTGPTGVL	SVTGPTGVL	0	0	0	0	0	SVTGPTGVL	OmpA	0.083541	1.054	0.162909	1.247	8579.57	WB
69	BoLA-2:07001	TSTRGASAL	TSTRGASAL	0	0	0	0	0	TSTRGASAL	OmpA	0.073813	1.251	0.168876	1.11	8043.16	WB
154	BoLA-2:07001	KVERDTVTL	KVERDTVTL	0	0	0	0	0	KVERDTVTL	OmpA	0.07247	1.283	0.110188	4.049	15177.5	WB
181	BoLA-2:07001	STWPDMKIV	STWPDMKIV	0	0	0	0	0	STWPDMKIV	OmpA	0.066144	1.454	0.140206	2.046	10968.5	WB
179	BoLA-2:07001	ATSTWPDMK	ATSTWPDMK	0	0	0	0	0	ATSTWPDMK	OmpA	0.064642	1.498	0.138286	2.14	11198.7	WB
290	BoLA-2:07001	VAGDHIATV	VAGDHIATV	0	0	0	0	0	VAGDHIATV	OmpA	0.063001	1.562	0.119857	3.249	13669.9	WB
86	BoLA-2:07001	RSGNTVTLI	RSGNTVTLI	0	0	0	0	0	RSGNTVTLI	OmpA	0.057934	1.761	0.16335	1.238	8538.73	WB
42	BoLA-2:07001	IAAIGYGAF	IAAIGYGAF	0	0	0	0	0	IAAIGYGAF	OmpA	0.0568	1.807	0.180823	0.868	7067.87	WB
54	BoLA-2:07001	QSVTGPTGV	QSVTGPTGV	0	0	0	0	0	QSVTGPTGV	OmpA	0.05261	1.979	0.121462	3.123	13434.6	WB
125	BoLA-2:07101	HVDPVVRSL	HVDPVVRSL	0	0	0	0	0	HVDPVVRSL	OmpA	0.190522	0.42	0.087015	8.073	19502.4	SB
280	BoLA-2:07101	IVADYLVAR	IVADYLVAR	0	0	0	0	0	IVADYLVAR	OmpA	0.169625	0.533	0.150337	1.512	9829.72	WB
164	BoLA-2:07101	GTAPSSEHK	GTAPSSEHK	0	0	0	0	0	GTAPSSEHK	OmpA	0.163882	0.567	0.121134	3.196	13482.3	WB
136	BoLA-2:07101	SSAEPVFTA	SSAEPVFTA	0	0	0	0	0	SSAEPVFTA	OmpA	0.141474	0.743	0.128985	2.614	12384.4	WB
48	BoLA-2:07101	GAFERPQSV	GAFERPQSV	0	0	0	0	0	GAFERPQSV	OmpA	0.120841	0.983	0.096068	6.264	17682.7	WB
181	BoLA-2:07101	STWPDMKIV	STWPDMKIV	0	0	0	0	0	STWPDMKIV	OmpA	0.118579	1.015	0.128145	2.673	12497.4	WB
217	BoLA-2:07101	AVTGGPIAF	AVTGGPIAF	0	0	0	0	0	AVTGGPIAF	OmpA	0.112201	1.103	0.083908	8.835	20169.2	WB
13	BoLA-2:07101	TTDARRTQK	TTDARRTQK	0	0	0	0	0	TTDARRTQK	OmpA	0.110452	1.132	0.119153	3.367	13774.4	WB
179	BoLA-2:07101	ATSTWPDMK	ATSTWPDMK	0	0	0	0	0	ATSTWPDMK	OmpA	0.107378	1.183	0.144424	1.741	10479.1	WB
252	BoLA-2:07101	DARVTINGY	DARVTINGY	0	0	0	0	0	DARVTINGY	OmpA	0.103563	1.253	0.107239	4.614	15669.6	WB
74	BoLA-2:07101	ASALSLSLL	ASALSLSLL	0	0	0	0	0	ASALSLSLL	OmpA	0.102215	1.279	0.149522	1.542	9916.78	WB
269	BoLA-2:07101	INIPLSAQR	INIPLSAQR	0	0	0	0	0	INIPLSAQR	OmpA	0.090609	1.52	0.114016	3.863	14561.7	WB
143	BoLA-2:07101	TASVPIPDF	TASVPIPDF	0	0	0	0	0	TASVPIPDF	OmpA	0.086346	1.641	0.1048	4.928	16088.6	WB
15	BoLA-2:07101	DARRTQKFY	DARRTQKFY	0	0	0	0	0	DARRTQKFY	OmpA	0.084851	1.689	0.108436	4.466	15467.9	WB
229	BoLA-2:07101	GASLIPADY	GASLIPADY	0	0	0	0	0	GASLIPADY	OmpA	0.081649	1.801	0.119103	3.371	13781.9	WB
33	BoLA-3:00101	IGAVVIPLL	IGAVVIPLL	0	0	0	0	0	IGAVVIPLL	OmpA	0.160956	0.099	0.169744	0.096	7967.98	SB
24	BoLA-3:00101	RGSPGRPWL	RGSPGRPWL	0	0	0	0	0	RGSPGRPWL	OmpA	0.099377	0.24	0.130645	0.299	12163.9	SB
25	BoLA-3:00101	GSPGRPWLI	GSPGRPWLI	0	0	0	0	0	GSPGRPWLI	OmpA	0.094841	0.262	0.108725	0.609	15419.6	SB
74	BoLA-3:00101	ASALSLSLL	ASALSLSLL	0	0	0	0	0	ASALSLSLL	OmpA	0.069051	0.48	0.126134	0.349	12772.3	SB
145	BoLA-3:00101	SVPIPDFGL	SVPIPDFGL	0	0	0	0	0	SVPIPDFGL	OmpA	0.066797	0.51	0.093204	1.042	18239.3	WB
85	BoLA-3:00101	SRSGNTVTL	SRSGNTVTL	0	0	0	0	0	SRSGNTVTL	OmpA	0.061672	0.581	0.075502	1.989	22089.6	WB
290	BoLA-3:00101	VAGDHIATV	VAGDHIATV	0	0	0	0	0	VAGDHIATV	OmpA	0.05511	0.675	0.075527	1.987	22083.7	WB
249	BoLA-3:00101	ACPDARVTI	ACPDARVTI	0	0	0	0	0	ACPDARVTI	OmpA	0.052622	0.717	0.089526	1.186	18979.7	WB
48	BoLA-3:00101	GAFERPQSV	GAFERPQSV	0	0	0	0	0	GAFERPQSV	OmpA	0.049703	0.781	0.054659	4.852	27677.6	WB
73	BoLA-3:00101	GASALSLSL	GASALSLSL	0	0	0	0	0	GASALSLSL	OmpA	0.048874	0.799	0.088916	1.211	19105.4	WB
102	BoLA-3:00101	AKAALMTAL	AKAALMTAL	0	0	0	0	0	AKAALMTAL	OmpA	0.047188	0.84	0.093107	1.047	18258.4	WB
277	BoLA-3:00101	RAKIVADYL	RAKIVADYL	0	0	0	0	0	RAKIVADYL	OmpA	0.04373	0.943	0.074292	2.094	22380.7	WB
125	BoLA-3:00101	HVDPVVRSL	HVDPVVRSL	0	0	0	0	0	HVDPVVRSL	OmpA	0.042247	1.005	0.041372	9.166	31956.9	WB
37	BoLA-3:00101	VIPLLIAAI	VIPLLIAAI	0	0	0	0	0	VIPLLIAAI	OmpA	0.040652	1.054	0.104603	0.689	16122.9	WB
298	BoLA-3:00101	VGLGSVNPI	VGLGSVNPI	0	0	0	0	0	VGLGSVNPI	OmpA	0.037418	1.172	0.13639	0.253	11430.8	WB
69	BoLA-3:00101	TSTRGASAL	TSTRGASAL	0	0	0	0	0	TSTRGASAL	OmpA	0.037089	1.185	0.096819	0.907	17539.6	WB
315	BoLA-3:00101	RAKNRRVEI	RAKNRRVEI	0	0	0	0	0	RAKNRRVEI	OmpA	0.031098	1.503	0.056106	4.535	27247.7	WB
138	BoLA-3:00101	AEPVFTASV	AEPVFTASV	0	0	0	0	0	AEPVFTASV	OmpA	0.02991	1.575	0.080459	1.642	20936.1	WB
225	BoLA-3:00101	FGNDGASLI	FGNDGASLI	0	0	0	0	0	FGNDGASLI	OmpA	0.02957	1.595	0.094687	0.983	17948.9	WB
232	BoLA-3:00101	LIPADYEIL	LIPADYEIL	0	0	0	0	0	LIPADYEIL	OmpA	0.02887	1.656	0.074888	2.041	22236.9	WB
58	BoLA-3:00101	GPTGVLPTL	GPTGVLPTL	0	0	0	0	0	GPTGVLPTL	OmpA	0.027296	1.779	0.046414	7.131	30260.2	WB
57	BoLA-3:00101	TGPTGVLPT	TGPTGVLPT	0	0	0	0	0	TGPTGVLPT	OmpA	0.02698	1.802	0.10553	0.671	15962	WB
136	BoLA-3:00101	SSAEPVFTA	SSAEPVFTA	0	0	0	0	0	SSAEPVFTA	OmpA	0.024618	1.998	0.06205	3.486	25550.5	WB
33	BoLA-3:00102	IGAVVIPLL	IGAVVIPLL	0	0	0	0	0	IGAVVIPLL	OmpA	0.112261	0.12	0.140195	0.116	10969.8	SB
25	BoLA-3:00102	GSPGRPWLI	GSPGRPWLI	0	0	0	0	0	GSPGRPWLI	OmpA	0.086381	0.205	0.102355	0.423	16519.9	SB
85	BoLA-3:00102	SRSGNTVTL	SRSGNTVTL	0	0	0	0	0	SRSGNTVTL	OmpA	0.081618	0.23	0.083763	0.92	20200.9	SB
24	BoLA-3:00102	RGSPGRPWL	RGSPGRPWL	0	0	0	0	0	RGSPGRPWL	OmpA	0.081095	0.232	0.114845	0.256	14431.7	SB
249	BoLA-3:00102	ACPDARVTI	ACPDARVTI	0	0	0	0	0	ACPDARVTI	OmpA	0.060325	0.4	0.089516	0.722	18981.8	SB
145	BoLA-3:00102	SVPIPDFGL	SVPIPDFGL	0	0	0	0	0	SVPIPDFGL	OmpA	0.055834	0.472	0.086935	0.807	19519.3	SB
74	BoLA-3:00102	ASALSLSLL	ASALSLSLL	0	0	0	0	0	ASALSLSLL	OmpA	0.053012	0.516	0.115861	0.247	14273.9	WB
102	BoLA-3:00102	AKAALMTAL	AKAALMTAL	0	0	0	0	0	AKAALMTAL	OmpA	0.048661	0.582	0.095904	0.549	17714.1	WB
48	BoLA-3:00102	GAFERPQSV	GAFERPQSV	0	0	0	0	0	GAFERPQSV	OmpA	0.04638	0.624	0.05279	3.789	28243	WB
277	BoLA-3:00102	RAKIVADYL	RAKIVADYL	0	0	0	0	0	RAKIVADYL	OmpA	0.043936	0.681	0.068277	1.78	23885.7	WB
125	BoLA-3:00102	HVDPVVRSL	HVDPVVRSL	0	0	0	0	0	HVDPVVRSL	OmpA	0.041158	0.747	0.04207	6.706	31716.4	WB
73	BoLA-3:00102	GASALSLSL	GASALSLSL	0	0	0	0	0	GASALSLSL	OmpA	0.03873	0.809	0.07639	1.254	21878.4	WB
69	BoLA-3:00102	TSTRGASAL	TSTRGASAL	0	0	0	0	0	TSTRGASAL	OmpA	0.034038	0.984	0.088288	0.762	19235.7	WB
138	BoLA-3:00102	AEPVFTASV	AEPVFTASV	0	0	0	0	0	AEPVFTASV	OmpA	0.031531	1.09	0.080353	1.071	20960.1	WB
315	BoLA-3:00102	RAKNRRVEI	RAKNRRVEI	0	0	0	0	0	RAKNRRVEI	OmpA	0.031362	1.097	0.058437	2.834	26569.1	WB
290	BoLA-3:00102	VAGDHIATV	VAGDHIATV	0	0	0	0	0	VAGDHIATV	OmpA	0.030986	1.116	0.065374	2.026	24647.9	WB
37	BoLA-3:00102	VIPLLIAAI	VIPLLIAAI	0	0	0	0	0	VIPLLIAAI	OmpA	0.028053	1.281	0.094052	0.592	18072.7	WB
225	BoLA-3:00102	FGNDGASLI	FGNDGASLI	0	0	0	0	0	FGNDGASLI	OmpA	0.027683	1.304	0.083376	0.936	20285.6	WB
298	BoLA-3:00102	VGLGSVNPI	VGLGSVNPI	0	0	0	0	0	VGLGSVNPI	OmpA	0.026549	1.368	0.112416	0.284	14816	WB
33	BoLA-3:00103	IGAVVIPLL	IGAVVIPLL	0	0	0	0	0	IGAVVIPLL	OmpA	0.117363	0.195	0.147266	0.166	10161.8	SB
125	BoLA-3:00103	HVDPVVRSL	HVDPVVRSL	0	0	0	0	0	HVDPVVRSL	OmpA	0.114142	0.205	0.068043	2.708	23946.3	SB
145	BoLA-3:00103	SVPIPDFGL	SVPIPDFGL	0	0	0	0	0	SVPIPDFGL	OmpA	0.107412	0.234	0.12182	0.387	13382.6	SB
37	BoLA-3:00103	VIPLLIAAI	VIPLLIAAI	0	0	0	0	0	VIPLLIAAI	OmpA	0.105329	0.243	0.154472	0.138	9399.63	SB
25	BoLA-3:00103	GSPGRPWLI	GSPGRPWLI	0	0	0	0	0	GSPGRPWLI	OmpA	0.103544	0.251	0.118064	0.438	13937.7	SB
249	BoLA-3:00103	ACPDARVTI	ACPDARVTI	0	0	0	0	0	ACPDARVTI	OmpA	0.088146	0.351	0.103823	0.711	16259.6	SB
48	BoLA-3:00103	GAFERPQSV	GAFERPQSV	0	0	0	0	0	GAFERPQSV	OmpA	0.080891	0.399	0.067391	2.784	24115.8	SB
74	BoLA-3:00103	ASALSLSLL	ASALSLSLL	0	0	0	0	0	ASALSLSLL	OmpA	0.079163	0.417	0.143555	0.187	10578.1	SB
24	BoLA-3:00103	RGSPGRPWL	RGSPGRPWL	0	0	0	0	0	RGSPGRPWL	OmpA	0.075039	0.464	0.108762	0.599	15413.5	SB
232	BoLA-3:00103	LIPADYEIL	LIPADYEIL	0	0	0	0	0	LIPADYEIL	OmpA	0.066166	0.573	0.106992	0.638	15711.5	WB
69	BoLA-3:00103	TSTRGASAL	TSTRGASAL	0	0	0	0	0	TSTRGASAL	OmpA	0.051208	0.84	0.111558	0.548	14954.2	WB
315	BoLA-3:00103	RAKNRRVEI	RAKNRRVEI	0	0	0	0	0	RAKNRRVEI	OmpA	0.049605	0.878	0.065675	2.985	24567.7	WB
73	BoLA-3:00103	GASALSLSL	GASALSLSL	0	0	0	0	0	GASALSLSL	OmpA	0.049099	0.89	0.088996	1.222	19088.9	WB
277	BoLA-3:00103	RAKIVADYL	RAKIVADYL	0	0	0	0	0	RAKIVADYL	OmpA	0.04889	0.894	0.079862	1.733	21071.8	WB
231	BoLA-3:00103	SLIPADYEI	SLIPADYEI	0	0	0	0	0	SLIPADYEI	OmpA	0.048608	0.901	0.083647	1.503	20226.2	WB
55	BoLA-3:00103	SVTGPTGVL	SVTGPTGVL	0	0	0	0	0	SVTGPTGVL	OmpA	0.048528	0.904	0.088844	1.229	19120.3	WB
290	BoLA-3:00103	VAGDHIATV	VAGDHIATV	0	0	0	0	0	VAGDHIATV	OmpA	0.044826	1.019	0.077638	1.868	21585	WB
154	BoLA-3:00103	KVERDTVTL	KVERDTVTL	0	0	0	0	0	KVERDTVTL	OmpA	0.039385	1.217	0.061231	3.628	25777.9	WB
58	BoLA-3:00103	GPTGVLPTL	GPTGVLPTL	0	0	0	0	0	GPTGVLPTL	OmpA	0.037605	1.283	0.046073	7.174	30372.1	WB
225	BoLA-3:00103	FGNDGASLI	FGNDGASLI	0	0	0	0	0	FGNDGASLI	OmpA	0.036484	1.332	0.095153	0.982	17858.7	WB
105	BoLA-3:00103	ALMTALNGL	ALMTALNGL	0	0	0	0	0	ALMTALNGL	OmpA	0.032479	1.538	0.094631	1	17959.8	WB
85	BoLA-3:00103	SRSGNTVTL	SRSGNTVTL	0	0	0	0	0	SRSGNTVTL	OmpA	0.032182	1.555	0.06801	2.712	23954.8	WB
102	BoLA-3:00103	AKAALMTAL	AKAALMTAL	0	0	0	0	0	AKAALMTAL	OmpA	0.028423	1.793	0.078034	1.846	21492.7	WB
298	BoLA-3:00103	VGLGSVNPI	VGLGSVNPI	0	0	0	0	0	VGLGSVNPI	OmpA	0.026373	1.964	0.124741	0.358	12966.3	WB
85	BoLA-3:05801	SRSGNTVTL	SRSGNTVTL	0	0	0	0	0	SRSGNTVTL	OmpA	0.345855	0.124	0.311443	0.499	1719.92	SB
175	BoLA-3:05801	VKRAATSTW	VKRAATSTW	0	0	0	0	0	VKRAATSTW	OmpA	0.242667	0.444	0.299297	0.632	1961.47	SB
24	BoLA-3:05801	RGSPGRPWL	RGSPGRPWL	0	0	0	0	0	RGSPGRPWL	OmpA	0.225892	0.552	0.316524	0.462	1627.92	WB
125	BoLA-3:05801	HVDPVVRSL	HVDPVVRSL	0	0	0	0	0	HVDPVVRSL	OmpA	0.225157	0.557	0.150585	8.697	9803.38	WB
23	BoLA-3:05801	YRGSPGRPW	YRGSPGRPW	0	0	0	0	0	YRGSPGRPW	OmpA	0.208051	0.698	0.275699	0.967	2532.03	WB
276	BoLA-3:05801	QRAKIVADY	QRAKIVADY	0	0	0	0	0	QRAKIVADY	OmpA	0.202645	0.751	0.237163	1.872	3841.92	WB
33	BoLA-3:05801	IGAVVIPLL	IGAVVIPLL	0	0	0	0	0	IGAVVIPLL	OmpA	0.190185	0.887	0.331827	0.36	1379.51	WB
143	BoLA-3:05801	TASVPIPDF	TASVPIPDF	0	0	0	0	0	TASVPIPDF	OmpA	0.174919	1.088	0.240957	1.744	3687.4	WB
48	BoLA-3:05801	GAFERPQSV	GAFERPQSV	0	0	0	0	0	GAFERPQSV	OmpA	0.173676	1.105	0.191274	4.211	6312.18	WB
136	BoLA-3:05801	SSAEPVFTA	SSAEPVFTA	0	0	0	0	0	SSAEPVFTA	OmpA	0.170238	1.148	0.260824	1.237	2974.17	WB
74	BoLA-3:05801	ASALSLSLL	ASALSLSLL	0	0	0	0	0	ASALSLSLL	OmpA	0.168891	1.165	0.270582	1.056	2676.17	WB
217	BoLA-3:05801	AVTGGPIAF	AVTGGPIAF	0	0	0	0	0	AVTGGPIAF	OmpA	0.166753	1.192	0.200229	3.629	5729.28	WB
102	BoLA-3:05801	AKAALMTAL	AKAALMTAL	0	0	0	0	0	AKAALMTAL	OmpA	0.163541	1.24	0.253087	1.41	3233.86	WB
14	BoLA-3:05801	TDARRTQKF	TDARRTQKF	0	0	0	0	0	TDARRTQKF	OmpA	0.159211	1.309	0.184616	4.695	6783.68	WB
277	BoLA-3:05801	RAKIVADYL	RAKIVADYL	0	0	0	0	0	RAKIVADYL	OmpA	0.141151	1.64	0.247599	1.56	3431.7	WB
25	BoLA-3:05801	GSPGRPWLI	GSPGRPWLI	0	0	0	0	0	GSPGRPWLI	OmpA	0.126909	1.997	0.208742	3.136	5225.13	WB
186	BoLA-3:05901	MKIVNNIEV	MKIVNNIEV	0	0	0	0	0	MKIVNNIEV	OmpA	0.208246	0.194	0.173607	0.227	7641.81	SB
48	BoLA-3:05901	GAFERPQSV	GAFERPQSV	0	0	0	0	0	GAFERPQSV	OmpA	0.186796	0.268	0.118792	1.6	13828.3	SB
175	BoLA-3:05901	VKRAATSTW	VKRAATSTW	0	0	0	0	0	VKRAATSTW	OmpA	0.160655	0.394	0.14393	0.653	10535.3	SB
316	BoLA-3:05901	AKNRRVEIV	AKNRRVEIV	0	0	0	0	0	AKNRRVEIV	OmpA	0.149112	0.476	0.132736	0.978	11891.8	SB
102	BoLA-3:05901	AKAALMTAL	AKAALMTAL	0	0	0	0	0	AKAALMTAL	OmpA	0.142556	0.528	0.127221	1.183	12623	WB
85	BoLA-3:05901	SRSGNTVTL	SRSGNTVTL	0	0	0	0	0	SRSGNTVTL	OmpA	0.117768	0.758	0.113207	1.936	14689.7	WB
25	BoLA-3:05901	GSPGRPWLI	GSPGRPWLI	0	0	0	0	0	GSPGRPWLI	OmpA	0.107403	0.893	0.131399	1.029	12065.1	WB
122	BoLA-3:05901	DQIHVDPVV	DQIHVDPVV	0	0	0	0	0	DQIHVDPVV	OmpA	0.085575	1.317	0.103425	2.753	16329.7	WB
315	BoLA-3:05901	RAKNRRVEI	RAKNRRVEI	0	0	0	0	0	RAKNRRVEI	OmpA	0.075643	1.599	0.105128	2.588	16031.6	WB
278	BoLA-3:05901	AKIVADYLV	AKIVADYLV	0	0	0	0	0	AKIVADYLV	OmpA	0.075065	1.619	0.108886	2.269	15392.8	WB
14	BoLA-3:05901	TDARRTQKF	TDARRTQKF	0	0	0	0	0	TDARRTQKF	OmpA	0.071021	1.756	0.096593	3.553	17582.6	WB
99	BoLA-3:05901	DEAAKAALM	DEAAKAALM	0	0	0	0	0	DEAAKAALM	OmpA	0.070103	1.787	0.111681	2.043	14934.3	WB
136	BoLA-3:05901	SSAEPVFTA	SSAEPVFTA	0	0	0	0	0	SSAEPVFTA	OmpA	0.066804	1.915	0.108797	2.276	15407.6	WB
33	BoLA-3:05901	IGAVVIPLL	IGAVVIPLL	0	0	0	0	0	IGAVVIPLL	OmpA	0.065717	1.962	0.14147	0.71	10819.5	WB
85	BoLA-3:06501	SRSGNTVTL	SRSGNTVTL	0	0	0	0	0	SRSGNTVTL	OmpA	0.638953	0.037	0.393477	0.265	708	SB
24	BoLA-3:06501	RGSPGRPWL	RGSPGRPWL	0	0	0	0	0	RGSPGRPWL	OmpA	0.585285	0.078	0.487414	0.036	256.23	SB
125	BoLA-3:06501	HVDPVVRSL	HVDPVVRSL	0	0	0	0	0	HVDPVVRSL	OmpA	0.525477	0.137	0.232342	3.866	4047.64	SB
33	BoLA-3:06501	IGAVVIPLL	IGAVVIPLL	0	0	0	0	0	IGAVVIPLL	OmpA	0.485626	0.21	0.424546	0.149	505.87	SB
154	BoLA-3:06501	KVERDTVTL	KVERDTVTL	0	0	0	0	0	KVERDTVTL	OmpA	0.408539	0.437	0.271542	2.1	2648.51	SB
25	BoLA-3:06501	GSPGRPWLI	GSPGRPWLI	0	0	0	0	0	GSPGRPWLI	OmpA	0.395037	0.486	0.345531	0.595	1189.41	SB
231	BoLA-3:06501	SLIPADYEI	SLIPADYEI	0	0	0	0	0	SLIPADYEI	OmpA	0.393559	0.492	0.356044	0.497	1061.52	SB
277	BoLA-3:06501	RAKIVADYL	RAKIVADYL	0	0	0	0	0	RAKIVADYL	OmpA	0.391246	0.5	0.365554	0.424	957.73	WB
74	BoLA-3:06501	ASALSLSLL	ASALSLSLL	0	0	0	0	0	ASALSLSLL	OmpA	0.365125	0.64	0.361562	0.455	1000	WB
48	BoLA-3:06501	GAFERPQSV	GAFERPQSV	0	0	0	0	0	GAFERPQSV	OmpA	0.363591	0.65	0.222632	4.495	4496.03	WB
102	BoLA-3:06501	AKAALMTAL	AKAALMTAL	0	0	0	0	0	AKAALMTAL	OmpA	0.346321	0.773	0.29797	1.371	1989.84	WB
86	BoLA-3:06501	RSGNTVTLI	RSGNTVTLI	0	0	0	0	0	RSGNTVTLI	OmpA	0.344209	0.789	0.397117	0.249	680.66	WB
71	BoLA-3:06501	TRGASALSL	TRGASALSL	0	0	0	0	0	TRGASALSL	OmpA	0.33634	0.848	0.270666	2.129	2673.74	WB
73	BoLA-3:06501	GASALSLSL	GASALSLSL	0	0	0	0	0	GASALSLSL	OmpA	0.282707	1.331	0.292534	1.47	2110.38	WB
145	BoLA-3:06501	SVPIPDFGL	SVPIPDFGL	0	0	0	0	0	SVPIPDFGL	OmpA	0.264449	1.538	0.244756	3.184	3538.91	WB
105	BoLA-3:06501	ALMTALNGL	ALMTALNGL	0	0	0	0	0	ALMTALNGL	OmpA	0.256701	1.647	0.302303	1.294	1898.7	WB
239	BoLA-3:06501	ILNRVADKL	ILNRVADKL	0	0	0	0	0	ILNRVADKL	OmpA	0.252082	1.715	0.253986	2.754	3202.56	WB
290	BoLA-3:06501	VAGDHIATV	VAGDHIATV	0	0	0	0	0	VAGDHIATV	OmpA	0.243946	1.836	0.221608	4.564	4546.12	WB
125	BoLA-3:06601	HVDPVVRSL	HVDPVVRSL	0	0	0	0	0	HVDPVVRSL	OmpA	0.502737	0.063	0.231706	1.78	4075.59	SB
48	BoLA-3:06601	GAFERPQSV	GAFERPQSV	0	0	0	0	0	GAFERPQSV	OmpA	0.420373	0.129	0.272035	0.899	2634.42	SB
74	BoLA-3:06601	ASALSLSLL	ASALSLSLL	0	0	0	0	0	ASALSLSLL	OmpA	0.376221	0.203	0.378303	0.119	834.33	SB
277	BoLA-3:06601	RAKIVADYL	RAKIVADYL	0	0	0	0	0	RAKIVADYL	OmpA	0.324981	0.329	0.314747	0.414	1659.52	SB
33	BoLA-3:06601	IGAVVIPLL	IGAVVIPLL	0	0	0	0	0	IGAVVIPLL	OmpA	0.302895	0.397	0.313203	0.427	1687.48	SB
24	BoLA-3:06601	RGSPGRPWL	RGSPGRPWL	0	0	0	0	0	RGSPGRPWL	OmpA	0.293332	0.434	0.311188	0.443	1724.67	SB
55	BoLA-3:06601	SVTGPTGVL	SVTGPTGVL	0	0	0	0	0	SVTGPTGVL	OmpA	0.256789	0.592	0.26584	1.004	2817.06	WB
154	BoLA-3:06601	KVERDTVTL	KVERDTVTL	0	0	0	0	0	KVERDTVTL	OmpA	0.250386	0.629	0.212261	2.509	5029.93	WB
73	BoLA-3:06601	GASALSLSL	GASALSLSL	0	0	0	0	0	GASALSLSL	OmpA	0.244398	0.666	0.266715	0.989	2790.51	WB
290	BoLA-3:06601	VAGDHIATV	VAGDHIATV	0	0	0	0	0	VAGDHIATV	OmpA	0.23682	0.715	0.257207	1.165	3092.87	WB
85	BoLA-3:06601	SRSGNTVTL	SRSGNTVTL	0	0	0	0	0	SRSGNTVTL	OmpA	0.221467	0.833	0.206815	2.75	5335.22	WB
315	BoLA-3:06601	RAKNRRVEI	RAKNRRVEI	0	0	0	0	0	RAKNRRVEI	OmpA	0.21635	0.88	0.240441	1.553	3708.05	WB
86	BoLA-3:06601	RSGNTVTLI	RSGNTVTLI	0	0	0	0	0	RSGNTVTLI	OmpA	0.211963	0.922	0.304765	0.494	1848.79	WB
102	BoLA-3:06601	AKAALMTAL	AKAALMTAL	0	0	0	0	0	AKAALMTAL	OmpA	0.192681	1.116	0.229073	1.858	4193.37	WB
105	BoLA-3:06601	ALMTALNGL	ALMTALNGL	0	0	0	0	0	ALMTALNGL	OmpA	0.186865	1.186	0.284841	0.715	2293.56	WB
136	BoLA-3:06601	SSAEPVFTA	SSAEPVFTA	0	0	0	0	0	SSAEPVFTA	OmpA	0.182609	1.237	0.21531	2.389	4866.7	WB
69	BoLA-3:06601	TSTRGASAL	TSTRGASAL	0	0	0	0	0	TSTRGASAL	OmpA	0.169058	1.415	0.259301	1.124	3023.59	WB
145	BoLA-3:06601	SVPIPDFGL	SVPIPDFGL	0	0	0	0	0	SVPIPDFGL	OmpA	0.157407	1.598	0.184228	3.95	6812.21	WB
231	BoLA-3:06601	SLIPADYEI	SLIPADYEI	0	0	0	0	0	SLIPADYEI	OmpA	0.142716	1.87	0.214372	2.426	4916.35	WB
125	BoLA-3:06602	HVDPVVRSL	HVDPVVRSL	0	0	0	0	0	HVDPVVRSL	OmpA	0.50831	0.063	0.209552	1.676	5179.54	SB
48	BoLA-3:06602	GAFERPQSV	GAFERPQSV	0	0	0	0	0	GAFERPQSV	OmpA	0.452056	0.109	0.244891	0.856	3533.74	SB
74	BoLA-3:06602	ASALSLSLL	ASALSLSLL	0	0	0	0	0	ASALSLSLL	OmpA	0.386385	0.213	0.335703	0.122	1322.85	SB
277	BoLA-3:06602	RAKIVADYL	RAKIVADYL	0	0	0	0	0	RAKIVADYL	OmpA	0.356409	0.284	0.281635	0.409	2374.52	SB
33	BoLA-3:06602	IGAVVIPLL	IGAVVIPLL	0	0	0	0	0	IGAVVIPLL	OmpA	0.355053	0.287	0.289348	0.349	2184.4	SB
24	BoLA-3:06602	RGSPGRPWL	RGSPGRPWL	0	0	0	0	0	RGSPGRPWL	OmpA	0.336321	0.345	0.287568	0.362	2226.88	SB
154	BoLA-3:06602	KVERDTVTL	KVERDTVTL	0	0	0	0	0	KVERDTVTL	OmpA	0.301038	0.481	0.20039	1.994	5719.31	SB
73	BoLA-3:06602	GASALSLSL	GASALSLSL	0	0	0	0	0	GASALSLSL	OmpA	0.300173	0.485	0.258342	0.654	3055.12	SB
290	BoLA-3:06602	VAGDHIATV	VAGDHIATV	0	0	0	0	0	VAGDHIATV	OmpA	0.277027	0.596	0.237569	0.975	3825.08	WB
86	BoLA-3:06602	RSGNTVTLI	RSGNTVTLI	0	0	0	0	0	RSGNTVTLI	OmpA	0.264196	0.664	0.284664	0.384	2297.96	WB
85	BoLA-3:06602	SRSGNTVTL	SRSGNTVTL	0	0	0	0	0	SRSGNTVTL	OmpA	0.261025	0.681	0.192067	2.38	6258.25	WB
55	BoLA-3:06602	SVTGPTGVL	SVTGPTGVL	0	0	0	0	0	SVTGPTGVL	OmpA	0.249065	0.754	0.218113	1.416	4721.32	WB
315	BoLA-3:06602	RAKNRRVEI	RAKNRRVEI	0	0	0	0	0	RAKNRRVEI	OmpA	0.233513	0.875	0.208184	1.72	5256.78	WB
102	BoLA-3:06602	AKAALMTAL	AKAALMTAL	0	0	0	0	0	AKAALMTAL	OmpA	0.223308	0.976	0.212171	1.602	5034.83	WB
136	BoLA-3:06602	SSAEPVFTA	SSAEPVFTA	0	0	0	0	0	SSAEPVFTA	OmpA	0.218604	1.028	0.203129	1.898	5552.3	WB
105	BoLA-3:06602	ALMTALNGL	ALMTALNGL	0	0	0	0	0	ALMTALNGL	OmpA	0.201448	1.241	0.25627	0.679	3124.39	WB
69	BoLA-3:06602	TSTRGASAL	TSTRGASAL	0	0	0	0	0	TSTRGASAL	OmpA	0.196171	1.304	0.237635	0.974	3822.35	WB
231	BoLA-3:06602	SLIPADYEI	SLIPADYEI	0	0	0	0	0	SLIPADYEI	OmpA	0.169621	1.673	0.194367	2.273	6104.43	WB
25	BoLA-3:06602	GSPGRPWLI	GSPGRPWLI	0	0	0	0	0	GSPGRPWLI	OmpA	0.169059	1.683	0.166304	3.806	8270.13	WB
181	BoLA-3:06602	STWPDMKIV	STWPDMKIV	0	0	0	0	0	STWPDMKIV	OmpA	0.161774	1.823	0.176218	3.202	7428.94	WB
235	BoLA-3:06602	ADYEILNRV	ADYEILNRV	0	0	0	0	0	ADYEILNRV	OmpA	0.161427	1.83	0.150471	5.126	9815.48	WB
145	BoLA-3:06602	SVPIPDFGL	SVPIPDFGL	0	0	0	0	0	SVPIPDFGL	OmpA	0.158697	1.883	0.158775	4.375	8972.04	WB
317	BoLA-3:06602	KNRRVEIVV	KNRRVEIVV	0	0	0	0	0	KNRRVEIVV	OmpA	0.156148	1.939	0.194442	2.27	6099.48	WB
125	BoLA-3:06801	HVDPVVRSL	HVDPVVRSL	0	0	0	0	0	HVDPVVRSL	OmpA	0.52116	0.019	0.212072	1.514	5040.23	SB
74	BoLA-3:06801	ASALSLSLL	ASALSLSLL	0	0	0	0	0	ASALSLSLL	OmpA	0.348697	0.192	0.329945	0.129	1407.89	SB
48	BoLA-3:06801	GAFERPQSV	GAFERPQSV	0	0	0	0	0	GAFERPQSV	OmpA	0.293896	0.367	0.197445	1.998	5904.48	SB
143	BoLA-3:06801	TASVPIPDF	TASVPIPDF	0	0	0	0	0	TASVPIPDF	OmpA	0.265554	0.512	0.194134	2.144	6119.84	WB
154	BoLA-3:06801	KVERDTVTL	KVERDTVTL	0	0	0	0	0	KVERDTVTL	OmpA	0.264868	0.517	0.195035	2.104	6060.47	WB
277	BoLA-3:06801	RAKIVADYL	RAKIVADYL	0	0	0	0	0	RAKIVADYL	OmpA	0.263329	0.527	0.260305	0.568	2990.92	WB
231	BoLA-3:06801	SLIPADYEI	SLIPADYEI	0	0	0	0	0	SLIPADYEI	OmpA	0.258781	0.558	0.284602	0.349	2299.5	WB
136	BoLA-3:06801	SSAEPVFTA	SSAEPVFTA	0	0	0	0	0	SSAEPVFTA	OmpA	0.237721	0.691	0.259989	0.572	3001.16	WB
217	BoLA-3:06801	AVTGGPIAF	AVTGGPIAF	0	0	0	0	0	AVTGGPIAF	OmpA	0.229437	0.759	0.155861	4.596	9259.42	WB
33	BoLA-3:06801	IGAVVIPLL	IGAVVIPLL	0	0	0	0	0	IGAVVIPLL	OmpA	0.226969	0.781	0.258201	0.591	3059.79	WB
69	BoLA-3:06801	TSTRGASAL	TSTRGASAL	0	0	0	0	0	TSTRGASAL	OmpA	0.225232	0.796	0.243766	0.797	3577.02	WB
73	BoLA-3:06801	GASALSLSL	GASALSLSL	0	0	0	0	0	GASALSLSL	OmpA	0.209992	0.917	0.211609	1.528	5065.54	WB
55	BoLA-3:06801	SVTGPTGVL	SVTGPTGVL	0	0	0	0	0	SVTGPTGVL	OmpA	0.207443	0.941	0.20686	1.676	5332.62	WB
290	BoLA-3:06801	VAGDHIATV	VAGDHIATV	0	0	0	0	0	VAGDHIATV	OmpA	0.198914	1.025	0.199471	1.926	5776.46	WB
86	BoLA-3:06801	RSGNTVTLI	RSGNTVTLI	0	0	0	0	0	RSGNTVTLI	OmpA	0.198265	1.032	0.277465	0.408	2484.11	WB
178	BoLA-3:06801	AATSTWPDM	AATSTWPDM	0	0	0	0	0	AATSTWPDM	OmpA	0.192647	1.094	0.256638	0.609	3111.97	WB
235	BoLA-3:06801	ADYEILNRV	ADYEILNRV	0	0	0	0	0	ADYEILNRV	OmpA	0.171525	1.378	0.20913	1.605	5203.25	WB
14	BoLA-3:06801	TDARRTQKF	TDARRTQKF	0	0	0	0	0	TDARRTQKF	OmpA	0.167038	1.452	0.149197	5.242	9951.71	WB
54	BoLA-3:06801	QSVTGPTGV	QSVTGPTGV	0	0	0	0	0	QSVTGPTGV	OmpA	0.164472	1.496	0.189055	2.369	6465.56	WB
83	BoLA-3:06801	SISRSGNTV	SISRSGNTV	0	0	0	0	0	SISRSGNTV	OmpA	0.158168	1.614	0.222993	1.219	4478.5	WB
24	BoLA-3:06801	RGSPGRPWL	RGSPGRPWL	0	0	0	0	0	RGSPGRPWL	OmpA	0.154199	1.693	0.20986	1.583	5162.31	WB
25	BoLA-3:06801	GSPGRPWLI	GSPGRPWLI	0	0	0	0	0	GSPGRPWLI	OmpA	0.153353	1.711	0.164967	3.831	8390.64	WB
239	BoLA-3:06801	ILNRVADKL	ILNRVADKL	0	0	0	0	0	ILNRVADKL	OmpA	0.145001	1.891	0.181766	2.739	6996.11	WB
145	BoLA-3:06801	SVPIPDFGL	SVPIPDFGL	0	0	0	0	0	SVPIPDFGL	OmpA	0.143054	1.937	0.153528	4.808	9496.13	WB
125	BoLA-3:07301	HVDPVVRSL	HVDPVVRSL	0	0	0	0	0	HVDPVVRSL	OmpA	0.414941	0.037	0.227848	0.508	4249.32	SB
231	BoLA-3:07301	SLIPADYEI	SLIPADYEI	0	0	0	0	0	SLIPADYEI	OmpA	0.388196	0.049	0.412092	0.017	578.84	SB
154	BoLA-3:07301	KVERDTVTL	KVERDTVTL	0	0	0	0	0	KVERDTVTL	OmpA	0.285599	0.146	0.255447	0.333	3152.33	SB
113	BoLA-3:07301	LLAPGVNVI	LLAPGVNVI	0	0	0	0	0	LLAPGVNVI	OmpA	0.255729	0.216	0.271968	0.257	2636.33	SB
105	BoLA-3:07301	ALMTALNGL	ALMTALNGL	0	0	0	0	0	ALMTALNGL	OmpA	0.248081	0.233	0.340234	0.073	1259.56	SB
48	BoLA-3:07301	GAFERPQSV	GAFERPQSV	0	0	0	0	0	GAFERPQSV	OmpA	0.223747	0.307	0.184335	1.046	6804.33	SB
73	BoLA-3:07301	GASALSLSL	GASALSLSL	0	0	0	0	0	GASALSLSL	OmpA	0.204068	0.383	0.254293	0.339	3191.94	SB
74	BoLA-3:07301	ASALSLSLL	ASALSLSLL	0	0	0	0	0	ASALSLSLL	OmpA	0.184096	0.471	0.234162	0.464	3968.72	SB
55	BoLA-3:07301	SVTGPTGVL	SVTGPTGVL	0	0	0	0	0	SVTGPTGVL	OmpA	0.181307	0.484	0.214304	0.636	4919.97	SB
239	BoLA-3:07301	ILNRVADKL	ILNRVADKL	0	0	0	0	0	ILNRVADKL	OmpA	0.180589	0.487	0.22597	0.525	4336.54	SB
76	BoLA-3:07301	ALSLSLLSI	ALSLSLLSI	0	0	0	0	0	ALSLSLLSI	OmpA	0.180017	0.49	0.228883	0.499	4202	SB
277	BoLA-3:07301	RAKIVADYL	RAKIVADYL	0	0	0	0	0	RAKIVADYL	OmpA	0.167109	0.567	0.215162	0.627	4874.5	WB
24	BoLA-3:07301	RGSPGRPWL	RGSPGRPWL	0	0	0	0	0	RGSPGRPWL	OmpA	0.138861	0.781	0.204063	0.751	5496.47	WB
83	BoLA-3:07301	SISRSGNTV	SISRSGNTV	0	0	0	0	0	SISRSGNTV	OmpA	0.137728	0.789	0.212417	0.656	5021.45	WB
290	BoLA-3:07301	VAGDHIATV	VAGDHIATV	0	0	0	0	0	VAGDHIATV	OmpA	0.126219	0.899	0.164192	1.429	8461.29	WB
217	BoLA-3:07301	AVTGGPIAF	AVTGGPIAF	0	0	0	0	0	AVTGGPIAF	OmpA	0.124072	0.925	0.137229	2.232	11327.5	WB
25	BoLA-3:07301	GSPGRPWLI	GSPGRPWLI	0	0	0	0	0	GSPGRPWLI	OmpA	0.122139	0.948	0.152763	1.708	9575.05	WB
145	BoLA-3:07301	SVPIPDFGL	SVPIPDFGL	0	0	0	0	0	SVPIPDFGL	OmpA	0.12097	0.962	0.164658	1.418	8418.74	WB
136	BoLA-3:07301	SSAEPVFTA	SSAEPVFTA	0	0	0	0	0	SSAEPVFTA	OmpA	0.117867	0.999	0.178065	1.162	7281.95	WB
265	BoLA-3:07301	GSEGINIPL	GSEGINIPL	0	0	0	0	0	GSEGINIPL	OmpA	0.100615	1.255	0.191269	0.926	6312.52	WB
58	BoLA-3:07301	GPTGVLPTL	GPTGVLPTL	0	0	0	0	0	GPTGVLPTL	OmpA	0.097029	1.311	0.126594	2.654	12708.9	WB
33	BoLA-3:07301	IGAVVIPLL	IGAVVIPLL	0	0	0	0	0	IGAVVIPLL	OmpA	0.095017	1.347	0.170164	1.311	7931.85	WB
86	BoLA-3:07301	RSGNTVTLI	RSGNTVTLI	0	0	0	0	0	RSGNTVTLI	OmpA	0.085371	1.542	0.172829	1.26	7706.4	WB
69	BoLA-3:07301	TSTRGASAL	TSTRGASAL	0	0	0	0	0	TSTRGASAL	OmpA	0.084375	1.565	0.162569	1.465	8611.19	WB
112	BoLA-3:07301	GLLAPGVNV	GLLAPGVNV	0	0	0	0	0	GLLAPGVNV	OmpA	0.081538	1.632	0.142445	2.048	10706	WB
85	BoLA-3:07301	SRSGNTVTL	SRSGNTVTL	0	0	0	0	0	SRSGNTVTL	OmpA	0.076633	1.754	0.146045	1.927	10297	WB
37	BoLA-3:07301	VIPLLIAAI	VIPLLIAAI	0	0	0	0	0	VIPLLIAAI	OmpA	0.072324	1.875	0.164282	1.427	8453.06	WB
175	BoLA-4:02401	VKRAATSTW	VKRAATSTW	0	0	0	0	0	VKRAATSTW	OmpA	0.522663	0.181	0.254983	0.253	3168.2	SB
23	BoLA-4:02401	YRGSPGRPW	YRGSPGRPW	0	0	0	0	0	YRGSPGRPW	OmpA	0.17507	0.775	0.139249	1.089	11082.6	WB
125	BoLA-4:02401	HVDPVVRSL	HVDPVVRSL	0	0	0	0	0	HVDPVVRSL	OmpA	0.116891	1.127	0.048923	7.002	29449.8	WB
217	BoLA-4:02401	AVTGGPIAF	AVTGGPIAF	0	0	0	0	0	AVTGGPIAF	OmpA	0.106908	1.199	0.067471	4.022	24094.9	WB
48	BoLA-4:02401	GAFERPQSV	GAFERPQSV	0	0	0	0	0	GAFERPQSV	OmpA	0.072805	1.59	0.061175	4.781	25793.5	WB
175	BoLA-4:02402	VKRAATSTW	VKRAATSTW	0	0	0	0	0	VKRAATSTW	OmpA	0.624564	0.182	0.353111	0.313	1095.75	SB
23	BoLA-4:02402	YRGSPGRPW	YRGSPGRPW	0	0	0	0	0	YRGSPGRPW	OmpA	0.295618	0.879	0.217793	1.419	4737.7	WB
125	BoLA-4:02402	HVDPVVRSL	HVDPVVRSL	0	0	0	0	0	HVDPVVRSL	OmpA	0.2867	0.922	0.097442	7.753	17421.8	WB
217	BoLA-4:02402	AVTGGPIAF	AVTGGPIAF	0	0	0	0	0	AVTGGPIAF	OmpA	0.269222	1.013	0.135669	4.128	11520.3	WB
48	BoLA-4:02402	GAFERPQSV	GAFERPQSV	0	0	0	0	0	GAFERPQSV	OmpA	0.200776	1.493	0.119273	5.331	13756.6	WB
125	BoLA-4:06301	HVDPVVRSL	HVDPVVRSL	0	0	0	0	0	HVDPVVRSL	OmpA	0.342237	0.03	0.125063	0.77	12921.2	SB
48	BoLA-4:06301	GAFERPQSV	GAFERPQSV	0	0	0	0	0	GAFERPQSV	OmpA	0.261338	0.08	0.136571	0.56	11408.5	SB
25	BoLA-4:06301	GSPGRPWLI	GSPGRPWLI	0	0	0	0	0	GSPGRPWLI	OmpA	0.22889	0.121	0.169283	0.217	8007.82	SB
290	BoLA-4:06301	VAGDHIATV	VAGDHIATV	0	0	0	0	0	VAGDHIATV	OmpA	0.17487	0.251	0.137878	0.541	11248.3	SB
74	BoLA-4:06301	ASALSLSLL	ASALSLSLL	0	0	0	0	0	ASALSLSLL	OmpA	0.171025	0.265	0.16564	0.244	8329.76	SB
136	BoLA-4:06301	SSAEPVFTA	SSAEPVFTA	0	0	0	0	0	SSAEPVFTA	OmpA	0.154556	0.333	0.141102	0.496	10862.6	SB
180	BoLA-4:06301	TSTWPDMKI	TSTWPDMKI	0	0	0	0	0	TSTWPDMKI	OmpA	0.144755	0.382	0.178247	0.166	7267.63	SB
231	BoLA-4:06301	SLIPADYEI	SLIPADYEI	0	0	0	0	0	SLIPADYEI	OmpA	0.124616	0.494	0.150678	0.394	9793.52	SB
73	BoLA-4:06301	GASALSLSL	GASALSLSL	0	0	0	0	0	GASALSLSL	OmpA	0.121455	0.518	0.134506	0.589	11666.2	WB
181	BoLA-4:06301	STWPDMKIV	STWPDMKIV	0	0	0	0	0	STWPDMKIV	OmpA	0.113075	0.591	0.108038	1.201	15534.7	WB
86	BoLA-4:06301	RSGNTVTLI	RSGNTVTLI	0	0	0	0	0	RSGNTVTLI	OmpA	0.108483	0.636	0.141325	0.493	10836.5	WB
154	BoLA-4:06301	KVERDTVTL	KVERDTVTL	0	0	0	0	0	KVERDTVTL	OmpA	0.098841	0.741	0.08308	2.614	20350.7	WB
143	BoLA-4:06301	TASVPIPDF	TASVPIPDF	0	0	0	0	0	TASVPIPDF	OmpA	0.090943	0.84	0.107214	1.232	15673.8	WB
33	BoLA-4:06301	IGAVVIPLL	IGAVVIPLL	0	0	0	0	0	IGAVVIPLL	OmpA	0.08881	0.867	0.1428	0.478	10664.9	WB
85	BoLA-4:06301	SRSGNTVTL	SRSGNTVTL	0	0	0	0	0	SRSGNTVTL	OmpA	0.087332	0.886	0.091673	1.979	18543.9	WB
69	BoLA-4:06301	TSTRGASAL	TSTRGASAL	0	0	0	0	0	TSTRGASAL	OmpA	0.081375	0.985	0.115729	0.984	14294.3	WB
277	BoLA-4:06301	RAKIVADYL	RAKIVADYL	0	0	0	0	0	RAKIVADYL	OmpA	0.080993	0.991	0.098046	1.605	17308.3	WB
145	BoLA-4:06301	SVPIPDFGL	SVPIPDFGL	0	0	0	0	0	SVPIPDFGL	OmpA	0.075285	1.087	0.096722	1.678	17558	WB
34	BoLA-4:06301	GAVVIPLLI	GAVVIPLLI	0	0	0	0	0	GAVVIPLLI	OmpA	0.073808	1.115	0.117182	0.951	14071.3	WB
54	BoLA-4:06301	QSVTGPTGV	QSVTGPTGV	0	0	0	0	0	QSVTGPTGV	OmpA	0.068799	1.223	0.084882	2.466	19957.8	WB
24	BoLA-4:06301	RGSPGRPWL	RGSPGRPWL	0	0	0	0	0	RGSPGRPWL	OmpA	0.068179	1.238	0.088355	2.217	19221.7	WB
58	BoLA-4:06301	GPTGVLPTL	GPTGVLPTL	0	0	0	0	0	GPTGVLPTL	OmpA	0.06466	1.318	0.064563	4.735	24865.1	WB
55	BoLA-4:06301	SVTGPTGVL	SVTGPTGVL	0	0	0	0	0	SVTGPTGVL	OmpA	0.064277	1.327	0.096036	1.715	17688.8	WB
217	BoLA-4:06301	AVTGGPIAF	AVTGGPIAF	0	0	0	0	0	AVTGGPIAF	OmpA	0.056121	1.541	0.068423	4.178	23848	WB
315	BoLA-4:06301	RAKNRRVEI	RAKNRRVEI	0	0	0	0	0	RAKNRRVEI	OmpA	0.051768	1.683	0.067083	4.361	24196.3	WB
125	BoLA-5:00301	HVDPVVRSL	HVDPVVRSL	0	0	0	0	0	HVDPVVRSL	OmpA	0.540184	0.052	0.268589	1.971	2734.5	SB
231	BoLA-5:00301	SLIPADYEI	SLIPADYEI	0	0	0	0	0	SLIPADYEI	OmpA	0.493685	0.09	0.464272	0.057	329.13	SB
154	BoLA-5:00301	KVERDTVTL	KVERDTVTL	0	0	0	0	0	KVERDTVTL	OmpA	0.423982	0.181	0.304374	1.073	1856.63	SB
239	BoLA-5:00301	ILNRVADKL	ILNRVADKL	0	0	0	0	0	ILNRVADKL	OmpA	0.395674	0.253	0.363065	0.382	983.87	SB
48	BoLA-5:00301	GAFERPQSV	GAFERPQSV	0	0	0	0	0	GAFERPQSV	OmpA	0.37524	0.305	0.272692	1.833	2615.76	SB
105	BoLA-5:00301	ALMTALNGL	ALMTALNGL	0	0	0	0	0	ALMTALNGL	OmpA	0.374356	0.308	0.42394	0.126	509.2	SB
113	BoLA-5:00301	LLAPGVNVI	LLAPGVNVI	0	0	0	0	0	LLAPGVNVI	OmpA	0.3155	0.545	0.312726	0.936	1696.21	WB
76	BoLA-5:00301	ALSLSLLSI	ALSLSLLSI	0	0	0	0	0	ALSLSLLSI	OmpA	0.268904	0.834	0.302107	1.113	1902.74	WB
86	BoLA-5:00301	RSGNTVTLI	RSGNTVTLI	0	0	0	0	0	RSGNTVTLI	OmpA	0.268544	0.837	0.344659	0.535	1200.68	WB
277	BoLA-5:00301	RAKIVADYL	RAKIVADYL	0	0	0	0	0	RAKIVADYL	OmpA	0.262852	0.883	0.291673	1.329	2130.14	WB
112	BoLA-5:00301	GLLAPGVNV	GLLAPGVNV	0	0	0	0	0	GLLAPGVNV	OmpA	0.245516	1.061	0.270234	1.914	2686.26	WB
73	BoLA-5:00301	GASALSLSL	GASALSLSL	0	0	0	0	0	GASALSLSL	OmpA	0.24102	1.108	0.293621	1.286	2085.71	WB
74	BoLA-5:00301	ASALSLSLL	ASALSLSLL	0	0	0	0	0	ASALSLSLL	OmpA	0.23972	1.121	0.293412	1.29	2090.43	WB
83	BoLA-5:00301	SISRSGNTV	SISRSGNTV	0	0	0	0	0	SISRSGNTV	OmpA	0.232653	1.187	0.27851	1.656	2456.18	WB
290	BoLA-5:00301	VAGDHIATV	VAGDHIATV	0	0	0	0	0	VAGDHIATV	OmpA	0.221279	1.345	0.243919	2.978	3571.1	WB
24	BoLA-5:00301	RGSPGRPWL	RGSPGRPWL	0	0	0	0	0	RGSPGRPWL	OmpA	0.220235	1.361	0.273438	1.808	2594.74	WB
85	BoLA-5:00301	SRSGNTVTL	SRSGNTVTL	0	0	0	0	0	SRSGNTVTL	OmpA	0.21802	1.397	0.226883	3.926	4293.92	WB
55	BoLA-5:00301	SVTGPTGVL	SVTGPTGVL	0	0	0	0	0	SVTGPTGVL	OmpA	0.21076	1.51	0.22272	4.211	4491.75	WB
136	BoLA-5:00301	SSAEPVFTA	SSAEPVFTA	0	0	0	0	0	SSAEPVFTA	OmpA	0.207285	1.559	0.234859	3.457	3938.9	WB
217	BoLA-5:00301	AVTGGPIAF	AVTGGPIAF	0	0	0	0	0	AVTGGPIAF	OmpA	0.192224	1.812	0.166125	10.215	8286.17	WB
125	BoLA-5:03901	HVDPVVRSL	HVDPVVRSL	0	0	0	0	0	HVDPVVRSL	OmpA	0.241044	0.077	0.076537	1.611	21843.6	SB
25	BoLA-5:03901	GSPGRPWLI	GSPGRPWLI	0	0	0	0	0	GSPGRPWLI	OmpA	0.231489	0.087	0.14788	0.118	10094.5	SB
145	BoLA-5:03901	SVPIPDFGL	SVPIPDFGL	0	0	0	0	0	SVPIPDFGL	OmpA	0.191262	0.155	0.118575	0.336	13860.9	SB
74	BoLA-5:03901	ASALSLSLL	ASALSLSLL	0	0	0	0	0	ASALSLSLL	OmpA	0.178131	0.19	0.145655	0.126	10340.5	SB
154	BoLA-5:03901	KVERDTVTL	KVERDTVTL	0	0	0	0	0	KVERDTVTL	OmpA	0.151669	0.291	0.09131	0.942	18616.9	SB
48	BoLA-5:03901	GAFERPQSV	GAFERPQSV	0	0	0	0	0	GAFERPQSV	OmpA	0.145572	0.325	0.078259	1.519	21440.4	SB
86	BoLA-5:03901	RSGNTVTLI	RSGNTVTLI	0	0	0	0	0	RSGNTVTLI	OmpA	0.134113	0.394	0.133176	0.202	11835.3	SB
277	BoLA-5:03901	RAKIVADYL	RAKIVADYL	0	0	0	0	0	RAKIVADYL	OmpA	0.130588	0.418	0.098367	0.692	17248.3	SB
24	BoLA-5:03901	RGSPGRPWL	RGSPGRPWL	0	0	0	0	0	RGSPGRPWL	OmpA	0.122926	0.474	0.114508	0.389	14484.4	SB
231	BoLA-5:03901	SLIPADYEI	SLIPADYEI	0	0	0	0	0	SLIPADYEI	OmpA	0.114932	0.549	0.117063	0.356	14089.5	WB
37	BoLA-5:03901	VIPLLIAAI	VIPLLIAAI	0	0	0	0	0	VIPLLIAAI	OmpA	0.114135	0.557	0.125914	0.26	12802.8	WB
232	BoLA-5:03901	LIPADYEIL	LIPADYEIL	0	0	0	0	0	LIPADYEIL	OmpA	0.10633	0.654	0.109713	0.466	15255.7	WB
33	BoLA-5:03901	IGAVVIPLL	IGAVVIPLL	0	0	0	0	0	IGAVVIPLL	OmpA	0.103255	0.697	0.111657	0.433	14938.2	WB
315	BoLA-5:03901	RAKNRRVEI	RAKNRRVEI	0	0	0	0	0	RAKNRRVEI	OmpA	0.100448	0.737	0.076853	1.592	21769.1	WB
290	BoLA-5:03901	VAGDHIATV	VAGDHIATV	0	0	0	0	0	VAGDHIATV	OmpA	0.092728	0.856	0.080882	1.37	20840.5	WB
249	BoLA-5:03901	ACPDARVTI	ACPDARVTI	0	0	0	0	0	ACPDARVTI	OmpA	0.092166	0.865	0.082524	1.288	20473.5	WB
55	BoLA-5:03901	SVTGPTGVL	SVTGPTGVL	0	0	0	0	0	SVTGPTGVL	OmpA	0.082868	1.054	0.079729	1.433	21102.1	WB
73	BoLA-5:03901	GASALSLSL	GASALSLSL	0	0	0	0	0	GASALSLSL	OmpA	0.081479	1.082	0.077596	1.554	21594.8	WB
136	BoLA-5:03901	SSAEPVFTA	SSAEPVFTA	0	0	0	0	0	SSAEPVFTA	OmpA	0.076283	1.211	0.086448	1.113	19622.5	WB
69	BoLA-5:03901	TSTRGASAL	TSTRGASAL	0	0	0	0	0	TSTRGASAL	OmpA	0.074747	1.253	0.090397	0.977	18801.7	WB
105	BoLA-5:03901	ALMTALNGL	ALMTALNGL	0	0	0	0	0	ALMTALNGL	OmpA	0.068477	1.459	0.094016	0.836	18079.7	WB
298	BoLA-5:03901	VGLGSVNPI	VGLGSVNPI	0	0	0	0	0	VGLGSVNPI	OmpA	0.059304	1.803	0.112843	0.413	14747.7	WB
113	BoLA-5:03901	LLAPGVNVI	LLAPGVNVI	0	0	0	0	0	LLAPGVNVI	OmpA	0.0587	1.828	0.077167	1.576	21695.2	WB
239	BoLA-5:03901	ILNRVADKL	ILNRVADKL	0	0	0	0	0	ILNRVADKL	OmpA	0.057218	1.889	0.066156	2.497	24440.2	WB
217	BoLA-5:03901	AVTGGPIAF	AVTGGPIAF	0	0	0	0	0	AVTGGPIAF	OmpA	0.056591	1.915	0.047428	5.896	29930	WB
125	BoLA-5:06401	HVDPVVRSL	HVDPVVRSL	0	0	0	0	0	HVDPVVRSL	OmpA	0.238795	0.025	0.108904	0.941	15389.8	SB
48	BoLA-5:06401	GAFERPQSV	GAFERPQSV	0	0	0	0	0	GAFERPQSV	OmpA	0.162474	0.09	0.126106	0.544	12776.2	SB
154	BoLA-5:06401	KVERDTVTL	KVERDTVTL	0	0	0	0	0	KVERDTVTL	OmpA	0.148502	0.117	0.133287	0.428	11821.1	SB
74	BoLA-5:06401	ASALSLSLL	ASALSLSLL	0	0	0	0	0	ASALSLSLL	OmpA	0.111929	0.239	0.175945	0.111	7450.92	SB
86	BoLA-5:06401	RSGNTVTLI	RSGNTVTLI	0	0	0	0	0	RSGNTVTLI	OmpA	0.109581	0.249	0.185634	0.088	6709.36	SB
25	BoLA-5:06401	GSPGRPWLI	GSPGRPWLI	0	0	0	0	0	GSPGRPWLI	OmpA	0.095702	0.335	0.140272	0.351	10960.6	SB
231	BoLA-5:06401	SLIPADYEI	SLIPADYEI	0	0	0	0	0	SLIPADYEI	OmpA	0.095603	0.335	0.177527	0.106	7324.46	SB
290	BoLA-5:06401	VAGDHIATV	VAGDHIATV	0	0	0	0	0	VAGDHIATV	OmpA	0.094579	0.342	0.11893	0.686	13807.7	SB
73	BoLA-5:06401	GASALSLSL	GASALSLSL	0	0	0	0	0	GASALSLSL	OmpA	0.063557	0.674	0.103834	1.088	16257.6	WB
277	BoLA-5:06401	RAKIVADYL	RAKIVADYL	0	0	0	0	0	RAKIVADYL	OmpA	0.058445	0.766	0.107383	0.98	15645.2	WB
55	BoLA-5:06401	SVTGPTGVL	SVTGPTGVL	0	0	0	0	0	SVTGPTGVL	OmpA	0.058056	0.774	0.107074	0.988	15697.6	WB
217	BoLA-5:06401	AVTGGPIAF	AVTGGPIAF	0	0	0	0	0	AVTGGPIAF	OmpA	0.057932	0.776	0.066677	3.607	24302.8	WB
235	BoLA-5:06401	ADYEILNRV	ADYEILNRV	0	0	0	0	0	ADYEILNRV	OmpA	0.053648	0.868	0.099206	1.251	17092.4	WB
76	BoLA-5:06401	ALSLSLLSI	ALSLSLLSI	0	0	0	0	0	ALSLSLLSI	OmpA	0.052971	0.883	0.106465	1.004	15801.4	WB
136	BoLA-5:06401	SSAEPVFTA	SSAEPVFTA	0	0	0	0	0	SSAEPVFTA	OmpA	0.052713	0.889	0.109135	0.935	15351.4	WB
315	BoLA-5:06401	RAKNRRVEI	RAKNRRVEI	0	0	0	0	0	RAKNRRVEI	OmpA	0.051769	0.911	0.088709	1.724	19148.2	WB
105	BoLA-5:06401	ALMTALNGL	ALMTALNGL	0	0	0	0	0	ALMTALNGL	OmpA	0.048323	0.997	0.124462	0.575	13005.5	WB
83	BoLA-5:06401	SISRSGNTV	SISRSGNTV	0	0	0	0	0	SISRSGNTV	OmpA	0.045794	1.072	0.108013	0.964	15538.9	WB
239	BoLA-5:06401	ILNRVADKL	ILNRVADKL	0	0	0	0	0	ILNRVADKL	OmpA	0.043528	1.146	0.093067	1.507	18266.3	WB
113	BoLA-5:06401	LLAPGVNVI	LLAPGVNVI	0	0	0	0	0	LLAPGVNVI	OmpA	0.040118	1.269	0.105295	1.041	16002.6	WB
24	BoLA-5:06401	RGSPGRPWL	RGSPGRPWL	0	0	0	0	0	RGSPGRPWL	OmpA	0.03665	1.423	0.103815	1.088	16261	WB
69	BoLA-5:06401	TSTRGASAL	TSTRGASAL	0	0	0	0	0	TSTRGASAL	OmpA	0.034486	1.524	0.102377	1.138	16516	WB
145	BoLA-5:06401	SVPIPDFGL	SVPIPDFGL	0	0	0	0	0	SVPIPDFGL	OmpA	0.033621	1.569	0.085674	1.896	19787.5	WB
85	BoLA-5:06401	SRSGNTVTL	SRSGNTVTL	0	0	0	0	0	SRSGNTVTL	OmpA	0.032561	1.625	0.074966	2.726	22218.1	WB
33	BoLA-5:06401	IGAVVIPLL	IGAVVIPLL	0	0	0	0	0	IGAVVIPLL	OmpA	0.027899	1.911	0.084507	1.966	20038.9	WB
249	BoLA-5:06401	ACPDARVTI	ACPDARVTI	0	0	0	0	0	ACPDARVTI	OmpA	0.026998	1.978	0.046924	7.706	30093.7	WB
125	BoLA-5:07201	HVDPVVRSL	HVDPVVRSL	0	0	0	0	0	HVDPVVRSL	OmpA	0.343675	0.038	0.175387	1.066	7496.04	SB
154	BoLA-5:07201	KVERDTVTL	KVERDTVTL	0	0	0	0	0	KVERDTVTL	OmpA	0.270041	0.092	0.225843	0.352	4342.51	SB
231	BoLA-5:07201	SLIPADYEI	SLIPADYEI	0	0	0	0	0	SLIPADYEI	OmpA	0.264759	0.099	0.315624	0.046	1643.85	SB
48	BoLA-5:07201	GAFERPQSV	GAFERPQSV	0	0	0	0	0	GAFERPQSV	OmpA	0.20084	0.248	0.180237	0.964	7112.82	SB
74	BoLA-5:07201	ASALSLSLL	ASALSLSLL	0	0	0	0	0	ASALSLSLL	OmpA	0.200295	0.249	0.255473	0.185	3151.45	SB
25	BoLA-5:07201	GSPGRPWLI	GSPGRPWLI	0	0	0	0	0	GSPGRPWLI	OmpA	0.185217	0.303	0.218569	0.399	4698.09	SB
86	BoLA-5:07201	RSGNTVTLI	RSGNTVTLI	0	0	0	0	0	RSGNTVTLI	OmpA	0.15764	0.454	0.251673	0.197	3283.72	SB
145	BoLA-5:07201	SVPIPDFGL	SVPIPDFGL	0	0	0	0	0	SVPIPDFGL	OmpA	0.156624	0.461	0.192218	0.732	6248.03	SB
290	BoLA-5:07201	VAGDHIATV	VAGDHIATV	0	0	0	0	0	VAGDHIATV	OmpA	0.14351	0.556	0.1841	0.888	6821.65	WB
277	BoLA-5:07201	RAKIVADYL	RAKIVADYL	0	0	0	0	0	RAKIVADYL	OmpA	0.138546	0.597	0.209244	0.502	5196.83	WB
24	BoLA-5:07201	RGSPGRPWL	RGSPGRPWL	0	0	0	0	0	RGSPGRPWL	OmpA	0.136499	0.616	0.216254	0.424	4817.25	WB
136	BoLA-5:07201	SSAEPVFTA	SSAEPVFTA	0	0	0	0	0	SSAEPVFTA	OmpA	0.136228	0.619	0.207276	0.524	5308.68	WB
33	BoLA-5:07201	IGAVVIPLL	IGAVVIPLL	0	0	0	0	0	IGAVVIPLL	OmpA	0.133512	0.644	0.203767	0.565	5514.1	WB
105	BoLA-5:07201	ALMTALNGL	ALMTALNGL	0	0	0	0	0	ALMTALNGL	OmpA	0.13155	0.662	0.233606	0.303	3992.66	WB
217	BoLA-5:07201	AVTGGPIAF	AVTGGPIAF	0	0	0	0	0	AVTGGPIAF	OmpA	0.109541	0.936	0.113884	3.944	14582.5	WB
73	BoLA-5:07201	GASALSLSL	GASALSLSL	0	0	0	0	0	GASALSLSL	OmpA	0.107798	0.962	0.174006	1.096	7608.89	WB
55	BoLA-5:07201	SVTGPTGVL	SVTGPTGVL	0	0	0	0	0	SVTGPTGVL	OmpA	0.098573	1.128	0.141909	2.135	10768.2	WB
239	BoLA-5:07201	ILNRVADKL	ILNRVADKL	0	0	0	0	0	ILNRVADKL	OmpA	0.098139	1.137	0.163036	1.36	8567.79	WB
113	BoLA-5:07201	LLAPGVNVI	LLAPGVNVI	0	0	0	0	0	LLAPGVNVI	OmpA	0.094011	1.225	0.168567	1.218	8070.1	WB
37	BoLA-5:07201	VIPLLIAAI	VIPLLIAAI	0	0	0	0	0	VIPLLIAAI	OmpA	0.087068	1.386	0.173822	1.1	7624.05	WB
249	BoLA-5:07201	ACPDARVTI	ACPDARVTI	0	0	0	0	0	ACPDARVTI	OmpA	0.082534	1.51	0.109967	4.312	15213.8	WB
265	BoLA-5:07201	GSEGINIPL	GSEGINIPL	0	0	0	0	0	GSEGINIPL	OmpA	0.080924	1.556	0.173982	1.096	7610.86	WB
85	BoLA-5:07201	SRSGNTVTL	SRSGNTVTL	0	0	0	0	0	SRSGNTVTL	OmpA	0.07994	1.584	0.134296	2.497	11692.8	WB
315	BoLA-5:07201	RAKNRRVEI	RAKNRRVEI	0	0	0	0	0	RAKNRRVEI	OmpA	0.07517	1.711	0.132997	2.574	11858.3	WB
69	BoLA-5:07201	TSTRGASAL	TSTRGASAL	0	0	0	0	0	TSTRGASAL	OmpA	0.073035	1.775	0.144007	2.035	10526.5	WB
76	BoLA-5:07201	ALSLSLLSI	ALSLSLLSI	0	0	0	0	0	ALSLSLLSI	OmpA	0.072891	1.78	0.160596	1.434	8796.99	WB
83	BoLA-5:07201	SISRSGNTV	SISRSGNTV	0	0	0	0	0	SISRSGNTV	OmpA	0.072339	1.796	0.150607	1.782	9801.04	WB
232	BoLA-5:07201	LIPADYEIL	LIPADYEIL	0	0	0	0	0	LIPADYEIL	OmpA	0.068884	1.93	0.140555	2.199	10927.1	WB
277	BoLA-6:01301	RAKIVADYL	RAKIVADYL	0	0	0	0	0	RAKIVADYL	OmpA	0.432481	0.637	0.590888	0.364	83.64	WB
315	BoLA-6:01301	RAKNRRVEI	RAKNRRVEI	0	0	0	0	0	RAKNRRVEI	OmpA	0.368422	0.8	0.471377	0.97	304.78	WB
125	BoLA-6:01301	HVDPVVRSL	HVDPVVRSL	0	0	0	0	0	HVDPVVRSL	OmpA	0.207127	1.45	0.205418	6.967	5416.48	WB
105	BoLA-6:01301	ALMTALNGL	ALMTALNGL	0	0	0	0	0	ALMTALNGL	OmpA	0.175935	1.67	0.460739	1.045	341.96	WB
239	BoLA-6:01301	ILNRVADKL	ILNRVADKL	0	0	0	0	0	ILNRVADKL	OmpA	0.173843	1.686	0.390114	1.75	734.24	WB
48	BoLA-6:01301	GAFERPQSV	GAFERPQSV	0	0	0	0	0	GAFERPQSV	OmpA	0.172758	1.694	0.288225	3.677	2211.11	WB
277	BoLA-6:01302	RAKIVADYL	RAKIVADYL	0	0	0	0	0	RAKIVADYL	OmpA	0.133887	0.467	0.325323	0.244	1480.09	SB
315	BoLA-6:01302	RAKNRRVEI	RAKNRRVEI	0	0	0	0	0	RAKNRRVEI	OmpA	0.087034	0.732	0.219646	0.88	4643.66	WB
125	BoLA-6:01302	HVDPVVRSL	HVDPVVRSL	0	0	0	0	0	HVDPVVRSL	OmpA	0.068737	0.922	0.095615	5.837	17769.6	WB
48	BoLA-6:01302	GAFERPQSV	GAFERPQSV	0	0	0	0	0	GAFERPQSV	OmpA	0.04508	1.35	0.128248	3.307	12483.5	WB
105	BoLA-6:01302	ALMTALNGL	ALMTALNGL	0	0	0	0	0	ALMTALNGL	OmpA	0.029082	1.941	0.206951	1.053	5327.38	WB
138	BoLA-6:01401	AEPVFTASV	AEPVFTASV	0	0	0	0	0	AEPVFTASV	OmpA	0.263862	0.37	0.330663	0.338	1396.99	SB
235	BoLA-6:01401	ADYEILNRV	ADYEILNRV	0	0	0	0	0	ADYEILNRV	OmpA	0.248259	0.415	0.263772	0.89	2880.8	SB
196	BoLA-6:01401	GQAPPGPPA	GQAPPGPPA	0	0	0	0	0	GQAPPGPPA	OmpA	0.242876	0.434	0.287088	0.644	2238.47	SB
155	BoLA-6:01401	VERDTVTLT	VERDTVTLT	0	0	0	0	0	VERDTVTLT	OmpA	0.207133	0.57	0.227787	1.457	4252.12	WB
192	BoLA-6:01401	IEVTGQAPP	IEVTGQAPP	0	0	0	0	0	IEVTGQAPP	OmpA	0.197562	0.612	0.343779	0.265	1212.17	WB
99	BoLA-6:01401	DEAAKAALM	DEAAKAALM	0	0	0	0	0	DEAAKAALM	OmpA	0.190542	0.654	0.258224	0.959	3059.03	WB
50	BoLA-6:01401	FERPQSVTG	FERPQSVTG	0	0	0	0	0	FERPQSVTG	OmpA	0.107028	1.459	0.170436	3.133	7908.54	WB
266	BoLA-6:01401	SEGINIPLS	SEGINIPLS	0	0	0	0	0	SEGINIPLS	OmpA	0.095758	1.657	0.233391	1.364	4001.96	WB
209	BoLA-6:01401	ADLQSAINA	ADLQSAINA	0	0	0	0	0	ADLQSAINA	OmpA	0.092326	1.716	0.197611	2.191	5893.89	WB
48	BoLA-6:01401	GAFERPQSV	GAFERPQSV	0	0	0	0	0	GAFERPQSV	OmpA	0.082899	1.893	0.133871	5.358	11746.6	WB
192	BoLA-6:01402	IEVTGQAPP	IEVTGQAPP	0	0	0	0	0	IEVTGQAPP	OmpA	0.669032	0.268	0.585725	0.094	88.44	SB
138	BoLA-6:01402	AEPVFTASV	AEPVFTASV	0	0	0	0	0	AEPVFTASV	OmpA	0.463472	0.63	0.453162	0.634	371.17	WB
155	BoLA-6:01402	VERDTVTLT	VERDTVTLT	0	0	0	0	0	VERDTVTLT	OmpA	0.369366	0.903	0.309974	2.351	1747.48	WB
235	BoLA-6:01402	ADYEILNRV	ADYEILNRV	0	0	0	0	0	ADYEILNRV	OmpA	0.368794	0.905	0.353476	1.616	1091.43	WB
196	BoLA-6:01402	GQAPPGPPA	GQAPPGPPA	0	0	0	0	0	GQAPPGPPA	OmpA	0.359914	0.933	0.358622	1.549	1032.32	WB
266	BoLA-6:01402	SEGINIPLS	SEGINIPLS	0	0	0	0	0	SEGINIPLS	OmpA	0.265698	1.3	0.374195	1.356	872.25	WB
209	BoLA-6:01402	ADLQSAINA	ADLQSAINA	0	0	0	0	0	ADLQSAINA	OmpA	0.205472	1.656	0.291476	2.705	2134.68	WB
50	BoLA-6:01402	FERPQSVTG	FERPQSVTG	0	0	0	0	0	FERPQSVTG	OmpA	0.179931	1.869	0.248821	3.773	3386.63	WB
125	BoLA-6:01501	HVDPVVRSL	HVDPVVRSL	0	0	0	0	0	HVDPVVRSL	OmpA	0.084047	0.485	0.082327	3.414	20517.2	SB
48	BoLA-6:01501	GAFERPQSV	GAFERPQSV	0	0	0	0	0	GAFERPQSV	OmpA	0.075196	0.577	0.102546	1.861	16485.8	WB
315	BoLA-6:01501	RAKNRRVEI	RAKNRRVEI	0	0	0	0	0	RAKNRRVEI	OmpA	0.054594	0.887	0.099349	2.044	17066	WB
196	BoLA-6:01501	GQAPPGPPA	GQAPPGPPA	0	0	0	0	0	GQAPPGPPA	OmpA	0.051772	0.948	0.101314	1.928	16707	WB
138	BoLA-6:01501	AEPVFTASV	AEPVFTASV	0	0	0	0	0	AEPVFTASV	OmpA	0.049148	1.009	0.127457	0.897	12590.8	WB
99	BoLA-6:01501	DEAAKAALM	DEAAKAALM	0	0	0	0	0	DEAAKAALM	OmpA	0.045911	1.092	0.101146	1.937	16737.4	WB
235	BoLA-6:01501	ADYEILNRV	ADYEILNRV	0	0	0	0	0	ADYEILNRV	OmpA	0.039108	1.313	0.078701	3.845	21338.1	WB
102	BoLA-6:01501	AKAALMTAL	AKAALMTAL	0	0	0	0	0	AKAALMTAL	OmpA	0.038214	1.349	0.131233	0.804	12086.8	WB
292	BoLA-6:01501	GDHIATVGL	GDHIATVGL	0	0	0	0	0	GDHIATVGL	OmpA	0.031522	1.656	0.068446	5.437	23842.1	WB
14	BoLA-6:01501	TDARRTQKF	TDARRTQKF	0	0	0	0	0	TDARRTQKF	OmpA	0.029468	1.795	0.048256	11.259	29663.1	WB
125	BoLA-6:01502	HVDPVVRSL	HVDPVVRSL	0	0	0	0	0	HVDPVVRSL	OmpA	0.067351	0.343	0.073843	3.955	22489.7	SB
196	BoLA-6:01502	GQAPPGPPA	GQAPPGPPA	0	0	0	0	0	GQAPPGPPA	OmpA	0.047665	0.579	0.107679	1.336	15595.1	WB
48	BoLA-6:01502	GAFERPQSV	GAFERPQSV	0	0	0	0	0	GAFERPQSV	OmpA	0.045581	0.618	0.077512	3.475	21614.4	WB
138	BoLA-6:01502	AEPVFTASV	AEPVFTASV	0	0	0	0	0	AEPVFTASV	OmpA	0.033934	0.916	0.11643	1.029	14186.3	WB
315	BoLA-6:01502	RAKNRRVEI	RAKNRRVEI	0	0	0	0	0	RAKNRRVEI	OmpA	0.031595	0.998	0.094379	2.01	18008.8	WB
85	BoLA-6:01502	SRSGNTVTL	SRSGNTVTL	0	0	0	0	0	SRSGNTVTL	OmpA	0.026204	1.261	0.088791	2.417	19131.3	WB
102	BoLA-6:01502	AKAALMTAL	AKAALMTAL	0	0	0	0	0	AKAALMTAL	OmpA	0.02607	1.27	0.114576	1.084	14473.7	WB
99	BoLA-6:01502	DEAAKAALM	DEAAKAALM	0	0	0	0	0	DEAAKAALM	OmpA	0.023228	1.442	0.076336	3.624	21891.2	WB
55	BoLA-6:01502	SVTGPTGVL	SVTGPTGVL	0	0	0	0	0	SVTGPTGVL	OmpA	0.022316	1.502	0.095429	1.948	17805.4	WB
154	BoLA-6:01502	KVERDTVTL	KVERDTVTL	0	0	0	0	0	KVERDTVTL	OmpA	0.02001	1.68	0.079374	3.28	21183.3	WB
231	BoLA-6:01502	SLIPADYEI	SLIPADYEI	0	0	0	0	0	SLIPADYEI	OmpA	0.018774	1.789	0.128618	0.737	12433.6	WB
99	BoLA-6:03401	DEAAKAALM	DEAAKAALM	0	0	0	0	0	DEAAKAALM	OmpA	0.276533	0.169	0.233612	0.179	3992.4	SB
138	BoLA-6:03401	AEPVFTASV	AEPVFTASV	0	0	0	0	0	AEPVFTASV	OmpA	0.204943	0.282	0.231745	0.184	4073.87	SB
235	BoLA-6:03401	ADYEILNRV	ADYEILNRV	0	0	0	0	0	ADYEILNRV	OmpA	0.116328	0.646	0.123126	1.337	13194.9	WB
85	BoLA-6:03401	SRSGNTVTL	SRSGNTVTL	0	0	0	0	0	SRSGNTVTL	OmpA	0.096937	0.804	0.104596	1.921	16124.1	WB
125	BoLA-6:03401	HVDPVVRSL	HVDPVVRSL	0	0	0	0	0	HVDPVVRSL	OmpA	0.059649	1.34	0.056739	6.974	27061.7	WB
102	BoLA-6:03401	AKAALMTAL	AKAALMTAL	0	0	0	0	0	AKAALMTAL	OmpA	0.057602	1.392	0.131476	1.133	12055	WB
155	BoLA-6:03401	VERDTVTLT	VERDTVTLT	0	0	0	0	0	VERDTVTLT	OmpA	0.054261	1.464	0.079955	3.488	21050.6	WB
196	BoLA-6:03401	GQAPPGPPA	GQAPPGPPA	0	0	0	0	0	GQAPPGPPA	OmpA	0.052912	1.493	0.097183	2.278	17470.7	WB
282	BoLA-6:03401	ADYLVARGV	ADYLVARGV	0	0	0	0	0	ADYLVARGV	OmpA	0.042747	1.781	0.119404	1.426	13737.1	WB
292	BoLA-6:03401	GDHIATVGL	GDHIATVGL	0	0	0	0	0	GDHIATVGL	OmpA	0.037692	1.956	0.084716	3.089	19993.6	WB
50	BoLA-6:03401	FERPQSVTG	FERPQSVTG	0	0	0	0	0	FERPQSVTG	OmpA	0.036841	1.985	0.068627	4.76	23795.4	WB
24	BoLA-6:04001	RGSPGRPWL	RGSPGRPWL	0	0	0	0	0	RGSPGRPWL	OmpA	0.728676	0.012	0.407476	0.017	608.49	SB
33	BoLA-6:04001	IGAVVIPLL	IGAVVIPLL	0	0	0	0	0	IGAVVIPLL	OmpA	0.612206	0.037	0.361239	0.035	1003.5	SB
25	BoLA-6:04001	GSPGRPWLI	GSPGRPWLI	0	0	0	0	0	GSPGRPWLI	OmpA	0.292482	0.355	0.210285	0.599	5138.63	SB
277	BoLA-6:04001	RAKIVADYL	RAKIVADYL	0	0	0	0	0	RAKIVADYL	OmpA	0.259662	0.453	0.21089	0.592	5105.1	SB
85	BoLA-6:04001	SRSGNTVTL	SRSGNTVTL	0	0	0	0	0	SRSGNTVTL	OmpA	0.173607	0.95	0.112728	4.048	14766.1	WB
145	BoLA-6:04001	SVPIPDFGL	SVPIPDFGL	0	0	0	0	0	SVPIPDFGL	OmpA	0.169437	0.985	0.145691	2.064	10336.5	WB
74	BoLA-6:04001	ASALSLSLL	ASALSLSLL	0	0	0	0	0	ASALSLSLL	OmpA	0.161181	1.058	0.178369	1.057	7258.04	WB
102	BoLA-6:04001	AKAALMTAL	AKAALMTAL	0	0	0	0	0	AKAALMTAL	OmpA	0.147935	1.207	0.11581	3.797	14281.8	WB
125	BoLA-6:04001	HVDPVVRSL	HVDPVVRSL	0	0	0	0	0	HVDPVVRSL	OmpA	0.13572	1.361	0.067229	12.393	24158.1	WB
86	BoLA-6:04001	RSGNTVTLI	RSGNTVTLI	0	0	0	0	0	RSGNTVTLI	OmpA	0.135543	1.364	0.196852	0.77	5942.49	WB
298	BoLA-6:04001	VGLGSVNPI	VGLGSVNPI	0	0	0	0	0	VGLGSVNPI	OmpA	0.133536	1.397	0.200937	0.719	5685.56	WB
73	BoLA-6:04001	GASALSLSL	GASALSLSL	0	0	0	0	0	GASALSLSL	OmpA	0.127256	1.499	0.13002	2.838	12246.4	WB
154	BoLA-6:04001	KVERDTVTL	KVERDTVTL	0	0	0	0	0	KVERDTVTL	OmpA	0.119816	1.628	0.098041	5.677	17309.2	WB
315	BoLA-6:04001	RAKNRRVEI	RAKNRRVEI	0	0	0	0	0	RAKNRRVEI	OmpA	0.107124	1.892	0.117398	3.672	14038.5	WB
48	BoLA-6:04001	GAFERPQSV	GAFERPQSV	0	0	0	0	0	GAFERPQSV	OmpA	0.104755	1.951	0.070483	11.336	23322.4	WB
99	BoLA-6:04101	DEAAKAALM	DEAAKAALM	0	0	0	0	0	DEAAKAALM	OmpA	0.189354	0.438	0.301467	0.283	1915.96	SB
138	BoLA-6:04101	AEPVFTASV	AEPVFTASV	0	0	0	0	0	AEPVFTASV	OmpA	0.075575	1.109	0.234979	0.634	3933.78	WB
235	BoLA-6:04101	ADYEILNRV	ADYEILNRV	0	0	0	0	0	ADYEILNRV	OmpA	0.059891	1.339	0.169611	1.468	7979.45	WB
85	BoLA-6:04101	SRSGNTVTL	SRSGNTVTL	0	0	0	0	0	SRSGNTVTL	OmpA	0.03907	1.87	0.104361	4.302	16165.2	WB
125	BoLA-6:04101	HVDPVVRSL	HVDPVVRSL	0	0	0	0	0	HVDPVVRSL	OmpA	0.035498	2	0.068354	10.229	23865.8	WB
175	BoLA-amani.1	VKRAATSTW	VKRAATSTW	0	0	0	0	0	VKRAATSTW	OmpA	0.304943	0.667	0.203478	0.67	5531.38	WB
125	BoLA-amani.1	HVDPVVRSL	HVDPVVRSL	0	0	0	0	0	HVDPVVRSL	OmpA	0.246535	0.868	0.073659	5.467	22534.5	WB
48	BoLA-amani.1	GAFERPQSV	GAFERPQSV	0	0	0	0	0	GAFERPQSV	OmpA	0.228874	0.943	0.10317	2.868	16374.9	WB
86	BoLA-amani.1	RSGNTVTLI	RSGNTVTLI	0	0	0	0	0	RSGNTVTLI	OmpA	0.184048	1.179	0.182534	0.854	6938.22	WB
74	BoLA-amani.1	ASALSLSLL	ASALSLSLL	0	0	0	0	0	ASALSLSLL	OmpA	0.167639	1.285	0.144589	1.399	10460.5	WB
217	BoLA-amani.1	AVTGGPIAF	AVTGGPIAF	0	0	0	0	0	AVTGGPIAF	OmpA	0.161033	1.332	0.081032	4.629	20806.7	WB
181	BoLA-amani.1	STWPDMKIV	STWPDMKIV	0	0	0	0	0	STWPDMKIV	OmpA	0.143479	1.482	0.111928	2.438	14894.4	WB
25	BoLA-amani.1	GSPGRPWLI	GSPGRPWLI	0	0	0	0	0	GSPGRPWLI	OmpA	0.116648	1.79	0.094541	3.399	17977.3	WB
229	BoLA-amani.1	GASLIPADY	GASLIPADY	0	0	0	0	0	GASLIPADY	OmpA	0.107324	1.898	0.099006	3.105	17129.5	WB
277	BoLA-amani.1	RAKIVADYL	RAKIVADYL	0	0	0	0	0	RAKIVADYL	OmpA	0.105971	1.919	0.112717	2.407	14767.8	WB
23	BoLA-amani.1	YRGSPGRPW	YRGSPGRPW	0	0	0	0	0	YRGSPGRPW	OmpA	0.104504	1.943	0.101611	2.948	16653.4	WB
48	BoLA-gb1.7	GAFERPQSV	GAFERPQSV	0	0	0	0	0	GAFERPQSV	OmpA	0.283892	0.062	0.170003	0.929	7945.68	SB
25	BoLA-gb1.7	GSPGRPWLI	GSPGRPWLI	0	0	0	0	0	GSPGRPWLI	OmpA	0.234738	0.122	0.221629	0.22	4545.08	SB
315	BoLA-gb1.7	RAKNRRVEI	RAKNRRVEI	0	0	0	0	0	RAKNRRVEI	OmpA	0.163713	0.396	0.17398	0.836	7611.03	SB
136	BoLA-gb1.7	SSAEPVFTA	SSAEPVFTA	0	0	0	0	0	SSAEPVFTA	OmpA	0.163267	0.398	0.189721	0.559	6419.14	SB
290	BoLA-gb1.7	VAGDHIATV	VAGDHIATV	0	0	0	0	0	VAGDHIATV	OmpA	0.157346	0.434	0.161722	1.157	8690.47	SB
86	BoLA-gb1.7	RSGNTVTLI	RSGNTVTLI	0	0	0	0	0	RSGNTVTLI	OmpA	0.132747	0.613	0.199869	0.41	5751.64	WB
267	BoLA-gb1.7	EGINIPLSA	EGINIPLSA	0	0	0	0	0	EGINIPLSA	OmpA	0.129951	0.638	0.144356	1.817	10486.9	WB
85	BoLA-gb1.7	SRSGNTVTL	SRSGNTVTL	0	0	0	0	0	SRSGNTVTL	OmpA	0.128148	0.654	0.150459	1.563	9816.75	WB
317	BoLA-gb1.7	KNRRVEIVV	KNRRVEIVV	0	0	0	0	0	KNRRVEIVV	OmpA	0.127407	0.661	0.174162	0.831	7596.05	WB
74	BoLA-gb1.7	ASALSLSLL	ASALSLSLL	0	0	0	0	0	ASALSLSLL	OmpA	0.110361	0.855	0.18966	0.56	6423.38	WB
190	BoLA-gb1.7	NNIEVTGQA	NNIEVTGQA	0	0	0	0	0	NNIEVTGQA	OmpA	0.105918	0.913	0.156786	1.327	9167.22	WB
33	BoLA-gb1.7	IGAVVIPLL	IGAVVIPLL	0	0	0	0	0	IGAVVIPLL	OmpA	0.101333	0.989	0.196788	0.456	5946.6	WB
180	BoLA-gb1.7	TSTWPDMKI	TSTWPDMKI	0	0	0	0	0	TSTWPDMKI	OmpA	0.098814	1.028	0.168772	0.958	8052.22	WB
125	BoLA-gb1.7	HVDPVVRSL	HVDPVVRSL	0	0	0	0	0	HVDPVVRSL	OmpA	0.097121	1.054	0.081631	11.048	20672.3	WB
277	BoLA-gb1.7	RAKIVADYL	RAKIVADYL	0	0	0	0	0	RAKIVADYL	OmpA	0.093974	1.103	0.164294	1.087	8451.96	WB
249	BoLA-gb1.7	ACPDARVTI	ACPDARVTI	0	0	0	0	0	ACPDARVTI	OmpA	0.092499	1.139	0.120114	3.581	13632	WB
273	BoLA-gb1.7	LSAQRAKIV	LSAQRAKIV	0	0	0	0	0	LSAQRAKIV	OmpA	0.090419	1.191	0.15339	1.457	9510.32	WB
69	BoLA-gb1.7	TSTRGASAL	TSTRGASAL	0	0	0	0	0	TSTRGASAL	OmpA	0.087289	1.262	0.185496	0.623	6719.39	WB
118	BoLA-gb1.7	VNVIDQIHV	VNVIDQIHV	0	0	0	0	0	VNVIDQIHV	OmpA	0.0818	1.403	0.139377	2.09	11067.3	WB
186	BoLA-gb1.7	MKIVNNIEV	MKIVNNIEV	0	0	0	0	0	MKIVNNIEV	OmpA	0.075319	1.587	0.153549	1.45	9493.97	WB
101	BoLA-gb1.7	AAKAALMTA	AAKAALMTA	0	0	0	0	0	AAKAALMTA	OmpA	0.072959	1.661	0.110882	4.624	15064	WB
313	BoLA-gb1.7	EGRAKNRRV	EGRAKNRRV	0	0	0	0	0	EGRAKNRRV	OmpA	0.071447	1.711	0.118407	3.761	13886.1	WB
235	BoLA-gb1.7	ADYEILNRV	ADYEILNRV	0	0	0	0	0	ADYEILNRV	OmpA	0.071226	1.719	0.09897	6.559	17136.1	WB
225	BoLA-gb1.7	FGNDGASLI	FGNDGASLI	0	0	0	0	0	FGNDGASLI	OmpA	0.070755	1.736	0.168657	0.96	8062.24	WB
102	BoLA-gb1.7	AKAALMTAL	AKAALMTAL	0	0	0	0	0	AKAALMTAL	OmpA	0.066375	1.896	0.125043	3.083	12924	WB
316	BoLA-gb1.7	AKNRRVEIV	AKNRRVEIV	0	0	0	0	0	AKNRRVEIV	OmpA	0.066199	1.903	0.114364	4.205	14507	WB
54	BoLA-gb1.7	QSVTGPTGV	QSVTGPTGV	0	0	0	0	0	QSVTGPTGV	OmpA	0.065362	1.937	0.120107	3.582	13633	WB
20	BoLA-JSP.1	GNVTSIHSL	GNVTSIHSL	0	0	0	0	0	GNVTSIHSL	Esat-6	0.456343	0.241	0.234511	0.642	3953.76	SB
61	BoLA-JSP.1	TATELNNAL	TATELNNAL	0	0	0	0	0	TATELNNAL	Esat-6	0.355222	0.443	0.223536	0.785	4452.26	SB
21	BoLA-JSP.1	NVTSIHSLL	NVTSIHSLL	0	0	0	0	0	NVTSIHSLL	Esat-6	0.184752	1.434	0.181035	1.694	7051.67	WB
64	BoLA-T2c	ELNNALQNL	ELNNALQNL	0	0	0	0	0	ELNNALQNL	Esat-6	0.950633	0.047	0.724431	0.072	19.72	SB
21	BoLA-T2c	NVTSIHSLL	NVTSIHSLL	0	0	0	0	0	NVTSIHSLL	Esat-6	0.909221	0.102	0.689352	0.11	28.82	SB
75	BoLA-T2c	TISEAGQAM	TISEAGQAM	0	0	0	0	0	TISEAGQAM	Esat-6	0.876795	0.148	0.616967	0.223	63.08	SB
28	BoLA-T2c	LLDEGKQSL	LLDEGKQSL	0	0	0	0	0	LLDEGKQSL	Esat-6	0.858461	0.175	0.548354	0.416	132.52	SB
61	BoLA-T2c	TATELNNAL	TATELNNAL	0	0	0	0	0	TATELNNAL	Esat-6	0.82307	0.24	0.569439	0.349	105.49	SB
17	BoLA-T2c	AIQGNVTSI	AIQGNVTSI	0	0	0	0	0	AIQGNVTSI	Esat-6	0.592701	0.9	0.42168	1.072	521.81	WB
68	BoLA-T2c	ALQNLARTI	ALQNLARTI	0	0	0	0	0	ALQNLARTI	Esat-6	0.432838	1.777	0.375434	1.493	860.63	WB
86	BoLA-T2b	TEGNVTGMF	TEGNVTGMF	0	0	0	0	0	TEGNVTGMF	Esat-6	0.061497	1.309	0.173805	1.395	7625.45	WB
3	BoLA-T2b	EQQWNFAGI	EQQWNFAGI	0	0	0	0	0	EQQWNFAGI	Esat-6	0.05218	1.491	0.294718	0.305	2061.1	WB
49	BoLA-T2a	EAYQGVQQK	EAYQGVQQK	0	0	0	0	0	EAYQGVQQK	Esat-6	0.736891	0.172	0.254925	0.843	3170.19	SB
21	BoLA-T7	NVTSIHSLL	NVTSIHSLL	0	0	0	0	0	NVTSIHSLL	Esat-6	0.3323	0.114	0.298258	0.074	1983.65	SB
28	BoLA-T7	LLDEGKQSL	LLDEGKQSL	0	0	0	0	0	LLDEGKQSL	Esat-6	0.326713	0.123	0.188679	1.003	6491.92	SB
61	BoLA-T7	TATELNNAL	TATELNNAL	0	0	0	0	0	TATELNNAL	Esat-6	0.252134	0.291	0.237727	0.326	3818.55	SB
17	BoLA-T7	AIQGNVTSI	AIQGNVTSI	0	0	0	0	0	AIQGNVTSI	Esat-6	0.2251	0.407	0.190514	0.967	6364.3	SB
75	BoLA-T7	TISEAGQAM	TISEAGQAM	0	0	0	0	0	TISEAGQAM	Esat-6	0.204622	0.513	0.200909	0.776	5687.28	WB
64	BoLA-T7	ELNNALQNL	ELNNALQNL	0	0	0	0	0	ELNNALQNL	Esat-6	0.171155	0.785	0.162543	1.811	8613.61	WB
85	BoLA-T7	STEGNVTGM	STEGNVTGM	0	0	0	0	0	STEGNVTGM	Esat-6	0.150236	1.027	0.181359	1.183	7026.99	WB
31	BoLA-T7	EGKQSLTKL	EGKQSLTKL	0	0	0	0	0	EGKQSLTKL	Esat-6	0.116676	1.564	0.09191	8.048	18496.4	WB
18	BoLA-D18.4	IQGNVTSIH	IQGNVTSIH	0	0	0	0	0	IQGNVTSIH	Esat-6	0.414408	0.592	0.346476	0.562	1177.31	WB
33	BoLA-D18.4	KQSLTKLAA	KQSLTKLAA	0	0	0	0	0	KQSLTKLAA	Esat-6	0.314294	0.94	0.324742	0.724	1489.42	WB
20	BoLA-D18.4	GNVTSIHSL	GNVTSIHSL	0	0	0	0	0	GNVTSIHSL	Esat-6	0.170192	1.994	0.15403	6.435	9444.69	WB
20	BoLA-AW10	GNVTSIHSL	GNVTSIHSL	0	0	0	0	0	GNVTSIHSL	Esat-6	0.077711	0.381	0.090905	1.134	18698.6	SB
61	BoLA-AW10	TATELNNAL	TATELNNAL	0	0	0	0	0	TATELNNAL	Esat-6	0.07553	0.397	0.104926	0.683	16066.7	SB
31	BoLA-AW10	EGKQSLTKL	EGKQSLTKL	0	0	0	0	0	EGKQSLTKL	Esat-6	0.048268	0.814	0.062178	3.467	25515.1	WB
46	BoLA-AW10	SGSEAYQGV	SGSEAYQGV	0	0	0	0	0	SGSEAYQGV	Esat-6	0.041129	1.04	0.104477	0.692	16144.9	WB
18	BoLA-T5	IQGNVTSIH	IQGNVTSIH	0	0	0	0	0	IQGNVTSIH	Esat-6	0.594321	0.049	0.45038	0.065	382.51	SB
33	BoLA-T5	KQSLTKLAA	KQSLTKLAA	0	0	0	0	0	KQSLTKLAA	Esat-6	0.145696	1.087	0.244764	1.169	3538.6	WB
18	BoLA-1:00901	IQGNVTSIH	IQGNVTSIH	0	0	0	0	0	IQGNVTSIH	Esat-6	0.920714	0.022	0.58172	0.03	92.36	SB
75	BoLA-1:00901	TISEAGQAM	TISEAGQAM	0	0	0	0	0	TISEAGQAM	Esat-6	0.134435	1.779	0.209228	2.728	5197.73	WB
33	BoLA-1:00901	KQSLTKLAA	KQSLTKLAA	0	0	0	0	0	KQSLTKLAA	Esat-6	0.12554	1.889	0.219937	2.408	4629.06	WB
18	BoLA-1:00902	IQGNVTSIH	IQGNVTSIH	0	0	0	0	0	IQGNVTSIH	Esat-6	0.594321	0.049	0.45038	0.065	382.51	SB
33	BoLA-1:00902	KQSLTKLAA	KQSLTKLAA	0	0	0	0	0	KQSLTKLAA	Esat-6	0.145696	1.087	0.244764	1.169	3538.6	WB
77	BoLA-1:01901	SEAGQAMAS	SEAGQAMAS	0	0	0	0	0	SEAGQAMAS	Esat-6	0.283004	0.692	0.395864	0.533	689.95	WB
2	BoLA-1:01901	TEQQWNFAG	TEQQWNFAG	0	0	0	0	0	TEQQWNFAG	Esat-6	0.082847	1.893	0.453774	0.267	368.72	WB
48	BoLA-1:02001	SEAYQGVQQ	SEAYQGVQQ	0	0	0	0	0	SEAYQGVQQ	Esat-6	0.311518	0.259	0.260064	0.931	2998.73	SB
30	BoLA-1:02001	DEGKQSLTK	DEGKQSLTK	0	0	0	0	0	DEGKQSLTK	Esat-6	0.286249	0.317	0.227323	1.489	4273.52	SB
77	BoLA-1:02001	SEAGQAMAS	SEAGQAMAS	0	0	0	0	0	SEAGQAMAS	Esat-6	0.200001	0.65	0.308716	0.421	1771.43	WB
86	BoLA-1:02001	TEGNVTGMF	TEGNVTGMF	0	0	0	0	0	TEGNVTGMF	Esat-6	0.155603	0.946	0.265085	0.856	2840.17	WB
33	BoLA-1:02101	KQSLTKLAA	KQSLTKLAA	0	0	0	0	0	KQSLTKLAA	Esat-6	0.025809	0.532	0.107856	0.557	15565.3	WB
28	BoLA-1:02101	LLDEGKQSL	LLDEGKQSL	0	0	0	0	0	LLDEGKQSL	Esat-6	0.014957	0.928	0.041589	6.977	31881.9	WB
77	BoLA-1:02101	SEAGQAMAS	SEAGQAMAS	0	0	0	0	0	SEAGQAMAS	Esat-6	0.011376	1.206	0.090639	0.942	18752.5	WB
54	BoLA-1:02101	VQQKWDATA	VQQKWDATA	0	0	0	0	0	VQQKWDATA	Esat-6	0.009513	1.416	0.089034	0.999	19081	WB
18	BoLA-1:02301	IQGNVTSIH	IQGNVTSIH	0	0	0	0	0	IQGNVTSIH	Esat-6	0.414408	0.592	0.346476	0.562	1177.31	WB
33	BoLA-1:02301	KQSLTKLAA	KQSLTKLAA	0	0	0	0	0	KQSLTKLAA	Esat-6	0.314294	0.94	0.324742	0.724	1489.42	WB
20	BoLA-1:02301	GNVTSIHSL	GNVTSIHSL	0	0	0	0	0	GNVTSIHSL	Esat-6	0.170192	1.994	0.15403	6.435	9444.69	WB
28	BoLA-1:02801	LLDEGKQSL	LLDEGKQSL	0	0	0	0	0	LLDEGKQSL	Esat-6	0.150387	0.376	0.163341	2.366	8539.56	SB
20	BoLA-1:02801	GNVTSIHSL	GNVTSIHSL	0	0	0	0	0	GNVTSIHSL	Esat-6	0.076205	0.964	0.137121	3.873	11340.8	WB
17	BoLA-1:02801	AIQGNVTSI	AIQGNVTSI	0	0	0	0	0	AIQGNVTSI	Esat-6	0.067685	1.109	0.173881	1.905	7619.18	WB
68	BoLA-1:02801	ALQNLARTI	ALQNLARTI	0	0	0	0	0	ALQNLARTI	Esat-6	0.061345	1.24	0.203481	1.107	5531.19	WB
33	BoLA-1:02801	KQSLTKLAA	KQSLTKLAA	0	0	0	0	0	KQSLTKLAA	Esat-6	0.057695	1.322	0.159197	2.553	8931.17	WB
57	BoLA-1:02801	KWDATATEL	KWDATATEL	0	0	0	0	0	KWDATATEL	Esat-6	0.042958	1.823	0.123303	5.046	13169.6	WB
86	BoLA-1:02901	TEGNVTGMF	TEGNVTGMF	0	0	0	0	0	TEGNVTGMF	Esat-6	0.140611	0.832	0.220145	0.533	4618.65	WB
20	BoLA-1:02901	GNVTSIHSL	GNVTSIHSL	0	0	0	0	0	GNVTSIHSL	Esat-6	0.104462	1.257	0.112144	4.581	14859.7	WB
3	BoLA-1:02901	EQQWNFAGI	EQQWNFAGI	0	0	0	0	0	EQQWNFAGI	Esat-6	0.088208	1.563	0.301482	0.101	1915.65	WB
50	BoLA-1:03101	AYQGVQQKW	AYQGVQQKW	0	0	0	0	0	AYQGVQQKW	Esat-6	0.168896	1.083	0.125302	7.216	12887.8	WB
18	BoLA-1:03101	IQGNVTSIH	IQGNVTSIH	0	0	0	0	0	IQGNVTSIH	Esat-6	0.141917	1.395	0.183295	2.139	6881.33	WB
18	BoLA-1:03102	IQGNVTSIH	IQGNVTSIH	0	0	0	0	0	IQGNVTSIH	Esat-6	0.099309	1.411	0.190273	2.511	6380.92	WB
33	BoLA-1:03102	KQSLTKLAA	KQSLTKLAA	0	0	0	0	0	KQSLTKLAA	Esat-6	0.09638	1.483	0.227678	1.111	4257.14	WB
50	BoLA-1:03102	AYQGVQQKW	AYQGVQQKW	0	0	0	0	0	AYQGVQQKW	Esat-6	0.095439	1.505	0.108476	15.001	15461.2	WB
86	BoLA-1:04201	TEGNVTGMF	TEGNVTGMF	0	0	0	0	0	TEGNVTGMF	Esat-6	0.129596	1.061	0.20899	1.147	5211.14	WB
48	BoLA-1:04201	SEAYQGVQQ	SEAYQGVQQ	0	0	0	0	0	SEAYQGVQQ	Esat-6	0.122728	1.133	0.16162	2.895	8700.06	WB
30	BoLA-1:04201	DEGKQSLTK	DEGKQSLTK	0	0	0	0	0	DEGKQSLTK	Esat-6	0.094469	1.582	0.135894	4.907	11492.3	WB
28	BoLA-1:06101	LLDEGKQSL	LLDEGKQSL	0	0	0	0	0	LLDEGKQSL	Esat-6	0.525147	0.036	0.295277	0.518	2048.67	SB
33	BoLA-1:06101	KQSLTKLAA	KQSLTKLAA	0	0	0	0	0	KQSLTKLAA	Esat-6	0.307188	0.239	0.30049	0.471	1936.32	SB
17	BoLA-1:06101	AIQGNVTSI	AIQGNVTSI	0	0	0	0	0	AIQGNVTSI	Esat-6	0.299096	0.257	0.277521	0.713	2482.6	SB
68	BoLA-1:06101	ALQNLARTI	ALQNLARTI	0	0	0	0	0	ALQNLARTI	Esat-6	0.239318	0.456	0.296546	0.506	2020.73	SB
54	BoLA-1:06101	VQQKWDATA	VQQKWDATA	0	0	0	0	0	VQQKWDATA	Esat-6	0.238138	0.461	0.317332	0.347	1613.75	SB
75	BoLA-1:06101	TISEAGQAM	TISEAGQAM	0	0	0	0	0	TISEAGQAM	Esat-6	0.198024	0.69	0.238674	1.416	3779.62	WB
61	BoLA-1:06101	TATELNNAL	TATELNNAL	0	0	0	0	0	TATELNNAL	Esat-6	0.146411	1.186	0.191095	3.369	6324.42	WB
71	BoLA-1:06101	NLARTISEA	NLARTISEA	0	0	0	0	0	NLARTISEA	Esat-6	0.13418	1.366	0.240242	1.375	3716.04	WB
20	BoLA-1:06101	GNVTSIHSL	GNVTSIHSL	0	0	0	0	0	GNVTSIHSL	Esat-6	0.123961	1.54	0.161835	5.668	8679.85	WB
9	BoLA-1:06101	AGIEAAASA	AGIEAAASA	0	0	0	0	0	AGIEAAASA	Esat-6	0.12263	1.562	0.234208	1.534	3966.74	WB
55	BoLA-1:06101	QQKWDATAT	QQKWDATAT	0	0	0	0	0	QQKWDATAT	Esat-6	0.114862	1.712	0.201417	2.795	5656.11	WB
82	BoLA-1:06101	AMASTEGNV	AMASTEGNV	0	0	0	0	0	AMASTEGNV	Esat-6	0.113868	1.734	0.293355	0.536	2091.72	WB
64	BoLA-1:06101	ELNNALQNL	ELNNALQNL	0	0	0	0	0	ELNNALQNL	Esat-6	0.112221	1.771	0.168045	5.071	8115.81	WB
28	BoLA-1:06701	LLDEGKQSL	LLDEGKQSL	0	0	0	0	0	LLDEGKQSL	Esat-6	0.598185	0.048	0.345501	0.605	1189.79	SB
61	BoLA-1:06701	TATELNNAL	TATELNNAL	0	0	0	0	0	TATELNNAL	Esat-6	0.448702	0.209	0.374459	0.363	869.76	SB
57	BoLA-1:06701	KWDATATEL	KWDATATEL	0	0	0	0	0	KWDATATEL	Esat-6	0.350809	0.472	0.269554	1.973	2706.1	SB
21	BoLA-1:06701	NVTSIHSLL	NVTSIHSLL	0	0	0	0	0	NVTSIHSLL	Esat-6	0.339105	0.514	0.347053	0.59	1169.98	WB
20	BoLA-1:06701	GNVTSIHSL	GNVTSIHSL	0	0	0	0	0	GNVTSIHSL	Esat-6	0.267845	0.91	0.268844	1.996	2726.97	WB
85	BoLA-1:06701	STEGNVTGM	STEGNVTGM	0	0	0	0	0	STEGNVTGM	Esat-6	0.266933	0.917	0.260137	2.307	2996.36	WB
17	BoLA-1:06701	AIQGNVTSI	AIQGNVTSI	0	0	0	0	0	AIQGNVTSI	Esat-6	0.24663	1.095	0.25106	2.652	3305.57	WB
75	BoLA-1:06701	TISEAGQAM	TISEAGQAM	0	0	0	0	0	TISEAGQAM	Esat-6	0.203128	1.572	0.221344	4.178	4559.12	WB
28	BoLA-1:07401	LLDEGKQSL	LLDEGKQSL	0	0	0	0	0	LLDEGKQSL	Esat-6	0.095	0.626	0.091603	3.77	18558	WB
86	BoLA-1:07401	TEGNVTGMF	TEGNVTGMF	0	0	0	0	0	TEGNVTGMF	Esat-6	0.091614	0.659	0.173497	0.574	7650.9	WB
68	BoLA-1:07401	ALQNLARTI	ALQNLARTI	0	0	0	0	0	ALQNLARTI	Esat-6	0.061265	1.101	0.143803	1.085	10549.8	WB
20	BoLA-1:07401	GNVTSIHSL	GNVTSIHSL	0	0	0	0	0	GNVTSIHSL	Esat-6	0.041777	1.671	0.075434	5.944	22105.9	WB
3	BoLA-1:07401	EQQWNFAGI	EQQWNFAGI	0	0	0	0	0	EQQWNFAGI	Esat-6	0.036787	1.877	0.225843	0.197	4342.51	WB
61	BoLA-2:00501	TATELNNAL	TATELNNAL	0	0	0	0	0	TATELNNAL	Esat-6	0.265697	0.31	0.212185	0.77	5034.07	SB
28	BoLA-2:00501	LLDEGKQSL	LLDEGKQSL	0	0	0	0	0	LLDEGKQSL	Esat-6	0.190499	0.685	0.124193	5.848	13043.4	WB
21	BoLA-2:00501	NVTSIHSLL	NVTSIHSLL	0	0	0	0	0	NVTSIHSLL	Esat-6	0.171027	0.887	0.207446	0.858	5298.92	WB
17	BoLA-2:00501	AIQGNVTSI	AIQGNVTSI	0	0	0	0	0	AIQGNVTSI	Esat-6	0.160325	1.028	0.150763	3.164	9784.51	WB
31	BoLA-2:00501	EGKQSLTKL	EGKQSLTKL	0	0	0	0	0	EGKQSLTKL	Esat-6	0.120178	1.723	0.083986	15.617	20152.2	WB
46	BoLA-2:00501	SGSEAYQGV	SGSEAYQGV	0	0	0	0	0	SGSEAYQGV	Esat-6	0.115367	1.843	0.157873	2.678	9060.02	WB
75	BoLA-2:00501	TISEAGQAM	TISEAGQAM	0	0	0	0	0	TISEAGQAM	Esat-6	0.115051	1.851	0.13052	5.047	12180.4	WB
28	BoLA-2:00601	LLDEGKQSL	LLDEGKQSL	0	0	0	0	0	LLDEGKQSL	Esat-6	0.141419	0.368	0.106518	1.755	15792.3	SB
57	BoLA-2:00601	KWDATATEL	KWDATATEL	0	0	0	0	0	KWDATATEL	Esat-6	0.065994	1.495	0.083382	4.656	20284.3	WB
75	BoLA-2:00601	TISEAGQAM	TISEAGQAM	0	0	0	0	0	TISEAGQAM	Esat-6	0.063269	1.615	0.121179	0.978	13475.8	WB
20	BoLA-2:00601	GNVTSIHSL	GNVTSIHSL	0	0	0	0	0	GNVTSIHSL	Esat-6	0.059396	1.788	0.093187	3.08	18242.6	WB
28	BoLA-2:00602	LLDEGKQSL	LLDEGKQSL	0	0	0	0	0	LLDEGKQSL	Esat-6	0.141673	0.565	0.106821	2.992	15740.6	WB
35	BoLA-2:00801	SLTKLAAAW	SLTKLAAAW	0	0	0	0	0	SLTKLAAAW	Esat-6	0.759985	0.043	0.721643	0.019	20.32	SB
50	BoLA-2:00801	AYQGVQQKW	AYQGVQQKW	0	0	0	0	0	AYQGVQQKW	Esat-6	0.3872	0.321	0.250199	1.574	3336.51	SB
35	BoLA-2:00802	SLTKLAAAW	SLTKLAAAW	0	0	0	0	0	SLTKLAAAW	Esat-6	0.480763	0.061	0.507301	0.024	206.62	SB
50	BoLA-2:00802	AYQGVQQKW	AYQGVQQKW	0	0	0	0	0	AYQGVQQKW	Esat-6	0.362067	0.132	0.178998	1.175	7208.81	SB
49	BoLA-2:01201	EAYQGVQQK	EAYQGVQQK	0	0	0	0	0	EAYQGVQQK	Esat-6	0.736891	0.172	0.254925	0.843	3170.19	SB
86	BoLA-2:01601	TEGNVTGMF	TEGNVTGMF	0	0	0	0	0	TEGNVTGMF	Esat-6	0.058591	1.25	0.093621	1.068	18157.2	WB
50	BoLA-2:01601	AYQGVQQKW	AYQGVQQKW	0	0	0	0	0	AYQGVQQKW	Esat-6	0.04816	1.585	0.046654	11.126	30181.7	WB
28	BoLA-2:01601	LLDEGKQSL	LLDEGKQSL	0	0	0	0	0	LLDEGKQSL	Esat-6	0.044697	1.739	0.061398	4.873	25731.3	WB
18	BoLA-2:01601	IQGNVTSIH	IQGNVTSIH	0	0	0	0	0	IQGNVTSIH	Esat-6	0.0437	1.782	0.063248	4.42	25221.4	WB
28	BoLA-2:01602	LLDEGKQSL	LLDEGKQSL	0	0	0	0	0	LLDEGKQSL	Esat-6	0.141419	0.368	0.106518	1.755	15792.3	SB
57	BoLA-2:01602	KWDATATEL	KWDATATEL	0	0	0	0	0	KWDATATEL	Esat-6	0.065994	1.495	0.083382	4.656	20284.3	WB
75	BoLA-2:01602	TISEAGQAM	TISEAGQAM	0	0	0	0	0	TISEAGQAM	Esat-6	0.063269	1.615	0.121179	0.978	13475.8	WB
20	BoLA-2:01602	GNVTSIHSL	GNVTSIHSL	0	0	0	0	0	GNVTSIHSL	Esat-6	0.059396	1.788	0.093187	3.08	18242.6	WB
28	BoLA-2:01801	LLDEGKQSL	LLDEGKQSL	0	0	0	0	0	LLDEGKQSL	Esat-6	0.141488	1.577	0.070345	6.828	23357.2	WB
61	BoLA-2:01801	TATELNNAL	TATELNNAL	0	0	0	0	0	TATELNNAL	Esat-6	0.136051	1.625	0.10419	3.115	16195.1	WB
17	BoLA-2:01801	AIQGNVTSI	AIQGNVTSI	0	0	0	0	0	AIQGNVTSI	Esat-6	0.123741	1.75	0.096005	3.696	17694.8	WB
21	BoLA-2:01801	NVTSIHSLL	NVTSIHSLL	0	0	0	0	0	NVTSIHSLL	Esat-6	0.11039	1.893	0.133138	1.891	11840.2	WB
28	BoLA-2:01802	LLDEGKQSL	LLDEGKQSL	0	0	0	0	0	LLDEGKQSL	Esat-6	0.141488	1.577	0.070345	6.828	23357.2	WB
61	BoLA-2:01802	TATELNNAL	TATELNNAL	0	0	0	0	0	TATELNNAL	Esat-6	0.136051	1.625	0.10419	3.115	16195.1	WB
17	BoLA-2:01802	AIQGNVTSI	AIQGNVTSI	0	0	0	0	0	AIQGNVTSI	Esat-6	0.123741	1.75	0.096005	3.696	17694.8	WB
21	BoLA-2:01802	NVTSIHSLL	NVTSIHSLL	0	0	0	0	0	NVTSIHSLL	Esat-6	0.11039	1.893	0.133138	1.891	11840.2	WB
50	BoLA-2:02201	AYQGVQQKW	AYQGVQQKW	0	0	0	0	0	AYQGVQQKW	Esat-6	0.200295	0.179	0.153506	0.964	9498.39	SB
28	BoLA-2:02501	LLDEGKQSL	LLDEGKQSL	0	0	0	0	0	LLDEGKQSL	Esat-6	0.081954	0.806	0.089688	4.207	18946.5	WB
20	BoLA-2:02501	GNVTSIHSL	GNVTSIHSL	0	0	0	0	0	GNVTSIHSL	Esat-6	0.081678	0.81	0.109416	2.14	15304.8	WB
50	BoLA-2:02501	AYQGVQQKW	AYQGVQQKW	0	0	0	0	0	AYQGVQQKW	Esat-6	0.074746	0.929	0.062228	11.62	25501.3	WB
35	BoLA-2:02501	SLTKLAAAW	SLTKLAAAW	0	0	0	0	0	SLTKLAAAW	Esat-6	0.062094	1.221	0.135651	0.948	11522.6	WB
18	BoLA-2:02501	IQGNVTSIH	IQGNVTSIH	0	0	0	0	0	IQGNVTSIH	Esat-6	0.055531	1.422	0.068262	9.293	23889.6	WB
75	BoLA-2:02501	TISEAGQAM	TISEAGQAM	0	0	0	0	0	TISEAGQAM	Esat-6	0.049188	1.69	0.10603	2.387	15875.9	WB
33	BoLA-2:02501	KQSLTKLAA	KQSLTKLAA	0	0	0	0	0	KQSLTKLAA	Esat-6	0.048558	1.722	0.107278	2.296	15663	WB
28	BoLA-2:03001	LLDEGKQSL	LLDEGKQSL	0	0	0	0	0	LLDEGKQSL	Esat-6	0.118951	0.282	0.091507	1.457	18577.2	SB
61	BoLA-2:03001	TATELNNAL	TATELNNAL	0	0	0	0	0	TATELNNAL	Esat-6	0.100539	0.393	0.130946	0.329	12124.4	SB
20	BoLA-2:03001	GNVTSIHSL	GNVTSIHSL	0	0	0	0	0	GNVTSIHSL	Esat-6	0.057122	1.036	0.071228	3.369	23135.1	WB
75	BoLA-2:03001	TISEAGQAM	TISEAGQAM	0	0	0	0	0	TISEAGQAM	Esat-6	0.056736	1.045	0.102189	0.977	16549.6	WB
57	BoLA-2:03001	KWDATATEL	KWDATATEL	0	0	0	0	0	KWDATATEL	Esat-6	0.050087	1.238	0.059671	5.482	26216.7	WB
31	BoLA-2:03001	EGKQSLTKL	EGKQSLTKL	0	0	0	0	0	EGKQSLTKL	Esat-6	0.04731	1.335	0.05245	7.576	28347.1	WB
49	BoLA-2:03202	EAYQGVQQK	EAYQGVQQK	0	0	0	0	0	EAYQGVQQK	Esat-6	0.301031	0.163	0.193993	2.723	6129.19	SB
50	BoLA-2:04301	AYQGVQQKW	AYQGVQQKW	0	0	0	0	0	AYQGVQQKW	Esat-6	0.156942	0.452	0.126091	4.828	12778.3	SB
20	BoLA-2:04301	GNVTSIHSL	GNVTSIHSL	0	0	0	0	0	GNVTSIHSL	Esat-6	0.110195	0.942	0.11278	6.559	14757.8	WB
31	BoLA-2:04301	EGKQSLTKL	EGKQSLTKL	0	0	0	0	0	EGKQSLTKL	Esat-6	0.090779	1.338	0.085638	12.73	19795.2	WB
43	BoLA-2:04301	WGGSGSEAY	WGGSGSEAY	0	0	0	0	0	WGGSGSEAY	Esat-6	0.084734	1.502	0.191799	1.13	6276.42	WB
35	BoLA-2:04301	SLTKLAAAW	SLTKLAAAW	0	0	0	0	0	SLTKLAAAW	Esat-6	0.069935	1.983	0.17953	1.478	7167.44	WB
35	BoLA-2:04401	SLTKLAAAW	SLTKLAAAW	0	0	0	0	0	SLTKLAAAW	Esat-6	0.336923	0.574	0.286275	0.449	2258.25	WB
50	BoLA-2:04401	AYQGVQQKW	AYQGVQQKW	0	0	0	0	0	AYQGVQQKW	Esat-6	0.291023	0.851	0.15289	6.216	9561.91	WB
49	BoLA-2:04401	EAYQGVQQK	EAYQGVQQK	0	0	0	0	0	EAYQGVQQK	Esat-6	0.246729	1.257	0.157066	5.7	9139.48	WB
35	BoLA-2:04402	SLTKLAAAW	SLTKLAAAW	0	0	0	0	0	SLTKLAAAW	Esat-6	0.119999	0.956	0.20928	0.721	5194.81	WB
50	BoLA-2:04402	AYQGVQQKW	AYQGVQQKW	0	0	0	0	0	AYQGVQQKW	Esat-6	0.109625	1.127	0.095426	9.33	17806	WB
49	BoLA-2:04402	EAYQGVQQK	EAYQGVQQK	0	0	0	0	0	EAYQGVQQK	Esat-6	0.083638	1.715	0.105029	7.434	16048.8	WB
20	BoLA-2:04402	GNVTSIHSL	GNVTSIHSL	0	0	0	0	0	GNVTSIHSL	Esat-6	0.081025	1.792	0.107614	7.027	15606.1	WB
75	BoLA-2:04402	TISEAGQAM	TISEAGQAM	0	0	0	0	0	TISEAGQAM	Esat-6	0.078816	1.861	0.122654	4.919	13262.4	WB
49	BoLA-2:04501	EAYQGVQQK	EAYQGVQQK	0	0	0	0	0	EAYQGVQQK	Esat-6	0.54432	0.036	0.244742	0.523	3539.44	SB
20	BoLA-2:04601	GNVTSIHSL	GNVTSIHSL	0	0	0	0	0	GNVTSIHSL	Esat-6	0.166043	0.677	0.174042	4.349	7605.92	WB
50	BoLA-2:04601	AYQGVQQKW	AYQGVQQKW	0	0	0	0	0	AYQGVQQKW	Esat-6	0.129502	1.079	0.13109	10.573	12105.5	WB
46	BoLA-2:04601	SGSEAYQGV	SGSEAYQGV	0	0	0	0	0	SGSEAYQGV	Esat-6	0.103043	1.638	0.241928	1.13	3648.86	WB
31	BoLA-2:04601	EGKQSLTKL	EGKQSLTKL	0	0	0	0	0	EGKQSLTKL	Esat-6	0.094646	1.864	0.114354	15.056	14508.5	WB
20	BoLA-2:04701	GNVTSIHSL	GNVTSIHSL	0	0	0	0	0	GNVTSIHSL	Esat-6	0.188034	0.549	0.238827	3.106	3773.37	WB
50	BoLA-2:04701	AYQGVQQKW	AYQGVQQKW	0	0	0	0	0	AYQGVQQKW	Esat-6	0.128242	1.254	0.154588	14.622	9387.84	WB
31	BoLA-2:04701	EGKQSLTKL	EGKQSLTKL	0	0	0	0	0	EGKQSLTKL	Esat-6	0.125575	1.304	0.163781	12.382	8499	WB
49	BoLA-2:04701	EAYQGVQQK	EAYQGVQQK	0	0	0	0	0	EAYQGVQQK	Esat-6	0.100686	1.902	0.137581	19.699	11284.5	WB
46	BoLA-2:04701	SGSEAYQGV	SGSEAYQGV	0	0	0	0	0	SGSEAYQGV	Esat-6	0.100597	1.905	0.29089	1.107	2148.26	WB
50	BoLA-2:04801	AYQGVQQKW	AYQGVQQKW	0	0	0	0	0	AYQGVQQKW	Esat-6	0.44634	0.248	0.278165	0.682	2465.36	SB
35	BoLA-2:04801	SLTKLAAAW	SLTKLAAAW	0	0	0	0	0	SLTKLAAAW	Esat-6	0.115908	1.479	0.262131	0.839	2932.41	WB
17	BoLA-2:05401	AIQGNVTSI	AIQGNVTSI	0	0	0	0	0	AIQGNVTSI	Esat-6	0.02385	0.628	0.066948	1.233	24231.7	WB
61	BoLA-2:05401	TATELNNAL	TATELNNAL	0	0	0	0	0	TATELNNAL	Esat-6	0.022897	0.662	0.047021	3.576	30062.1	WB
20	BoLA-2:05401	GNVTSIHSL	GNVTSIHSL	0	0	0	0	0	GNVTSIHSL	Esat-6	0.016725	1.013	0.046595	3.667	30201	WB
85	BoLA-2:05401	STEGNVTGM	STEGNVTGM	0	0	0	0	0	STEGNVTGM	Esat-6	0.013204	1.367	0.049274	3.159	29338.2	WB
21	BoLA-2:05401	NVTSIHSLL	NVTSIHSLL	0	0	0	0	0	NVTSIHSLL	Esat-6	0.012693	1.429	0.056201	2.154	27219.7	WB
28	BoLA-2:05401	LLDEGKQSL	LLDEGKQSL	0	0	0	0	0	LLDEGKQSL	Esat-6	0.011888	1.532	0.033435	8.086	34822.5	WB
75	BoLA-2:05401	TISEAGQAM	TISEAGQAM	0	0	0	0	0	TISEAGQAM	Esat-6	0.011002	1.659	0.033515	8.041	34792.4	WB
74	BoLA-2:05401	RTISEAGQA	RTISEAGQA	0	0	0	0	0	RTISEAGQA	Esat-6	0.01007	1.817	0.05414	2.408	27833.5	WB
68	BoLA-2:05401	ALQNLARTI	ALQNLARTI	0	0	0	0	0	ALQNLARTI	Esat-6	0.009202	1.984	0.063564	1.471	25135.3	WB
49	BoLA-2:05501	EAYQGVQQK	EAYQGVQQK	0	0	0	0	0	EAYQGVQQK	Esat-6	0.117695	0.85	0.103554	7.374	16307	WB
18	BoLA-2:05501	IQGNVTSIH	IQGNVTSIH	0	0	0	0	0	IQGNVTSIH	Esat-6	0.088105	1.292	0.142224	2.617	10731.6	WB
61	BoLA-2:05601	TATELNNAL	TATELNNAL	0	0	0	0	0	TATELNNAL	Esat-6	0.121836	0.363	0.088701	0.927	19149.9	SB
85	BoLA-2:05601	STEGNVTGM	STEGNVTGM	0	0	0	0	0	STEGNVTGM	Esat-6	0.091463	0.645	0.07747	1.523	21624.2	WB
28	BoLA-2:05601	LLDEGKQSL	LLDEGKQSL	0	0	0	0	0	LLDEGKQSL	Esat-6	0.088484	0.687	0.059584	3.515	26241.4	WB
20	BoLA-2:05601	GNVTSIHSL	GNVTSIHSL	0	0	0	0	0	GNVTSIHSL	Esat-6	0.071802	0.972	0.057216	3.971	26922.4	WB
46	BoLA-2:05601	SGSEAYQGV	SGSEAYQGV	0	0	0	0	0	SGSEAYQGV	Esat-6	0.055593	1.447	0.065326	2.675	24660.7	WB
21	BoLA-2:05601	NVTSIHSLL	NVTSIHSLL	0	0	0	0	0	NVTSIHSLL	Esat-6	0.050035	1.672	0.074158	1.769	22413.2	WB
31	BoLA-2:05601	EGKQSLTKL	EGKQSLTKL	0	0	0	0	0	EGKQSLTKL	Esat-6	0.049765	1.684	0.032896	14.483	35026.2	WB
17	BoLA-2:05601	AIQGNVTSI	AIQGNVTSI	0	0	0	0	0	AIQGNVTSI	Esat-6	0.048496	1.741	0.060746	3.329	25913.5	WB
28	BoLA-2:05701	LLDEGKQSL	LLDEGKQSL	0	0	0	0	0	LLDEGKQSL	Esat-6	0.318382	0.364	0.172769	2.791	7711.41	SB
64	BoLA-2:05701	ELNNALQNL	ELNNALQNL	0	0	0	0	0	ELNNALQNL	Esat-6	0.226002	0.82	0.185692	2.125	6705.15	WB
68	BoLA-2:05701	ALQNLARTI	ALQNLARTI	0	0	0	0	0	ALQNLARTI	Esat-6	0.209872	0.941	0.204412	1.437	5475.76	WB
75	BoLA-2:05701	TISEAGQAM	TISEAGQAM	0	0	0	0	0	TISEAGQAM	Esat-6	0.209585	0.943	0.181707	2.311	7000.58	WB
21	BoLA-2:05701	NVTSIHSLL	NVTSIHSLL	0	0	0	0	0	NVTSIHSLL	Esat-6	0.19927	1.033	0.200962	1.539	5684.02	WB
17	BoLA-2:05701	AIQGNVTSI	AIQGNVTSI	0	0	0	0	0	AIQGNVTSI	Esat-6	0.198695	1.039	0.178616	2.456	7238.67	WB
31	BoLA-2:05701	EGKQSLTKL	EGKQSLTKL	0	0	0	0	0	EGKQSLTKL	Esat-6	0.162899	1.495	0.106319	10.639	15826.3	WB
61	BoLA-2:05701	TATELNNAL	TATELNNAL	0	0	0	0	0	TATELNNAL	Esat-6	0.151746	1.684	0.15442	4.045	9404.92	WB
50	BoLA-2:06001	AYQGVQQKW	AYQGVQQKW	0	0	0	0	0	AYQGVQQKW	Esat-6	0.066381	0.957	0.048625	13.706	29544.9	WB
28	BoLA-2:06001	LLDEGKQSL	LLDEGKQSL	0	0	0	0	0	LLDEGKQSL	Esat-6	0.063459	1.03	0.062078	7.003	25542.7	WB
18	BoLA-2:06001	IQGNVTSIH	IQGNVTSIH	0	0	0	0	0	IQGNVTSIH	Esat-6	0.057737	1.189	0.063446	6.569	25167.5	WB
35	BoLA-2:06001	SLTKLAAAW	SLTKLAAAW	0	0	0	0	0	SLTKLAAAW	Esat-6	0.041473	1.895	0.109285	0.84	15326.5	WB
20	BoLA-2:06001	GNVTSIHSL	GNVTSIHSL	0	0	0	0	0	GNVTSIHSL	Esat-6	0.040885	1.936	0.070751	4.555	23254.8	WB
18	BoLA-2:06201	IQGNVTSIH	IQGNVTSIH	0	0	0	0	0	IQGNVTSIH	Esat-6	0.171761	1.49	0.220589	3.074	4596.52	WB
28	BoLA-2:06901	LLDEGKQSL	LLDEGKQSL	0	0	0	0	0	LLDEGKQSL	Esat-6	0.098219	0.611	0.129515	4.201	12313.5	WB
50	BoLA-2:06901	AYQGVQQKW	AYQGVQQKW	0	0	0	0	0	AYQGVQQKW	Esat-6	0.096189	0.636	0.119789	5.233	13680	WB
20	BoLA-2:06901	GNVTSIHSL	GNVTSIHSL	0	0	0	0	0	GNVTSIHSL	Esat-6	0.076499	0.94	0.115095	5.805	14392.7	WB
35	BoLA-2:06901	SLTKLAAAW	SLTKLAAAW	0	0	0	0	0	SLTKLAAAW	Esat-6	0.074116	0.996	0.2579	0.234	3069.77	WB
75	BoLA-2:06901	TISEAGQAM	TISEAGQAM	0	0	0	0	0	TISEAGQAM	Esat-6	0.073759	1.004	0.183834	1.242	6841.31	WB
61	BoLA-2:06901	TATELNNAL	TATELNNAL	0	0	0	0	0	TATELNNAL	Esat-6	0.061062	1.338	0.149409	2.696	9928.91	WB
21	BoLA-2:06901	NVTSIHSLL	NVTSIHSLL	0	0	0	0	0	NVTSIHSLL	Esat-6	0.050524	1.748	0.160393	2.101	8816.34	WB
85	BoLA-2:07001	STEGNVTGM	STEGNVTGM	0	0	0	0	0	STEGNVTGM	Esat-6	0.161185	0.363	0.198524	0.601	5835.95	SB
75	BoLA-2:07001	TISEAGQAM	TISEAGQAM	0	0	0	0	0	TISEAGQAM	Esat-6	0.096101	0.858	0.152788	1.529	9572.47	WB
28	BoLA-2:07001	LLDEGKQSL	LLDEGKQSL	0	0	0	0	0	LLDEGKQSL	Esat-6	0.09224	0.903	0.103313	4.798	16349.5	WB
49	BoLA-2:07001	EAYQGVQQK	EAYQGVQQK	0	0	0	0	0	EAYQGVQQK	Esat-6	0.075772	1.205	0.088958	6.89	19096.7	WB
49	BoLA-2:07101	EAYQGVQQK	EAYQGVQQK	0	0	0	0	0	EAYQGVQQK	Esat-6	0.392296	0.044	0.195002	0.519	6062.63	SB
20	BoLA-3:00101	GNVTSIHSL	GNVTSIHSL	0	0	0	0	0	GNVTSIHSL	Esat-6	0.077711	0.381	0.090905	1.134	18698.6	SB
61	BoLA-3:00101	TATELNNAL	TATELNNAL	0	0	0	0	0	TATELNNAL	Esat-6	0.07553	0.397	0.104926	0.683	16066.7	SB
31	BoLA-3:00101	EGKQSLTKL	EGKQSLTKL	0	0	0	0	0	EGKQSLTKL	Esat-6	0.048268	0.814	0.062178	3.467	25515.1	WB
46	BoLA-3:00101	SGSEAYQGV	SGSEAYQGV	0	0	0	0	0	SGSEAYQGV	Esat-6	0.041129	1.04	0.104477	0.692	16144.9	WB
20	BoLA-3:00102	GNVTSIHSL	GNVTSIHSL	0	0	0	0	0	GNVTSIHSL	Esat-6	0.064541	0.359	0.085477	0.857	19829.7	SB
61	BoLA-3:00102	TATELNNAL	TATELNNAL	0	0	0	0	0	TATELNNAL	Esat-6	0.055969	0.469	0.091666	0.658	18545.3	SB
31	BoLA-3:00102	EGKQSLTKL	EGKQSLTKL	0	0	0	0	0	EGKQSLTKL	Esat-6	0.048187	0.589	0.056111	3.195	27246.2	WB
57	BoLA-3:00102	KWDATATEL	KWDATATEL	0	0	0	0	0	KWDATATEL	Esat-6	0.025169	1.461	0.047826	4.921	29801.4	WB
46	BoLA-3:00102	SGSEAYQGV	SGSEAYQGV	0	0	0	0	0	SGSEAYQGV	Esat-6	0.024131	1.539	0.08058	1.061	20908.7	WB
28	BoLA-3:00102	LLDEGKQSL	LLDEGKQSL	0	0	0	0	0	LLDEGKQSL	Esat-6	0.021673	1.76	0.036075	9.408	33841.9	WB
61	BoLA-3:00103	TATELNNAL	TATELNNAL	0	0	0	0	0	TATELNNAL	Esat-6	0.070759	0.514	0.10817	0.612	15512.5	WB
57	BoLA-3:00103	KWDATATEL	KWDATATEL	0	0	0	0	0	KWDATATEL	Esat-6	0.049686	0.876	0.059802	3.879	26179.5	WB
20	BoLA-3:00103	GNVTSIHSL	GNVTSIHSL	0	0	0	0	0	GNVTSIHSL	Esat-6	0.044181	1.041	0.083274	1.526	20308	WB
28	BoLA-3:00103	LLDEGKQSL	LLDEGKQSL	0	0	0	0	0	LLDEGKQSL	Esat-6	0.043855	1.053	0.053125	5.214	28140.8	WB
21	BoLA-3:00103	NVTSIHSLL	NVTSIHSLL	0	0	0	0	0	NVTSIHSLL	Esat-6	0.043531	1.064	0.097472	0.904	17416.1	WB
17	BoLA-3:00103	AIQGNVTSI	AIQGNVTSI	0	0	0	0	0	AIQGNVTSI	Esat-6	0.042991	1.083	0.084088	1.477	20130	WB
31	BoLA-3:00103	EGKQSLTKL	EGKQSLTKL	0	0	0	0	0	EGKQSLTKL	Esat-6	0.04086	1.162	0.058333	4.143	26599	WB
46	BoLA-3:00103	SGSEAYQGV	SGSEAYQGV	0	0	0	0	0	SGSEAYQGV	Esat-6	0.028743	1.771	0.087453	1.296	19410.2	WB
20	BoLA-3:00201	GNVTSIHSL	GNVTSIHSL	0	0	0	0	0	GNVTSIHSL	Esat-6	0.456343	0.241	0.234511	0.642	3953.76	SB
61	BoLA-3:00201	TATELNNAL	TATELNNAL	0	0	0	0	0	TATELNNAL	Esat-6	0.355222	0.443	0.223536	0.785	4452.26	SB
21	BoLA-3:00201	NVTSIHSLL	NVTSIHSLL	0	0	0	0	0	NVTSIHSLL	Esat-6	0.184752	1.434	0.181035	1.694	7051.67	WB
31	BoLA-3:00401	EGKQSLTKL	EGKQSLTKL	0	0	0	0	0	EGKQSLTKL	Esat-6	0.281175	0.064	0.196257	0.464	5980.87	SB
20	BoLA-3:00401	GNVTSIHSL	GNVTSIHSL	0	0	0	0	0	GNVTSIHSL	Esat-6	0.153485	0.457	0.158923	1.245	8957.68	SB
46	BoLA-3:00401	SGSEAYQGV	SGSEAYQGV	0	0	0	0	0	SGSEAYQGV	Esat-6	0.123711	0.694	0.211408	0.297	5076.57	WB
61	BoLA-3:00401	TATELNNAL	TATELNNAL	0	0	0	0	0	TATELNNAL	Esat-6	0.081472	1.413	0.151948	1.513	9659.86	WB
31	BoLA-3:00402	EGKQSLTKL	EGKQSLTKL	0	0	0	0	0	EGKQSLTKL	Esat-6	0.281175	0.064	0.196257	0.464	5980.87	SB
20	BoLA-3:00402	GNVTSIHSL	GNVTSIHSL	0	0	0	0	0	GNVTSIHSL	Esat-6	0.153485	0.457	0.158923	1.245	8957.68	SB
46	BoLA-3:00402	SGSEAYQGV	SGSEAYQGV	0	0	0	0	0	SGSEAYQGV	Esat-6	0.123711	0.694	0.211408	0.297	5076.57	WB
61	BoLA-3:00402	TATELNNAL	TATELNNAL	0	0	0	0	0	TATELNNAL	Esat-6	0.081472	1.413	0.151948	1.513	9659.86	WB
31	BoLA-3:00403	EGKQSLTKL	EGKQSLTKL	0	0	0	0	0	EGKQSLTKL	Esat-6	0.281175	0.064	0.196257	0.464	5980.87	SB
20	BoLA-3:00403	GNVTSIHSL	GNVTSIHSL	0	0	0	0	0	GNVTSIHSL	Esat-6	0.153485	0.457	0.158923	1.245	8957.68	SB
46	BoLA-3:00403	SGSEAYQGV	SGSEAYQGV	0	0	0	0	0	SGSEAYQGV	Esat-6	0.123711	0.694	0.211408	0.297	5076.57	WB
61	BoLA-3:00403	TATELNNAL	TATELNNAL	0	0	0	0	0	TATELNNAL	Esat-6	0.081472	1.413	0.151948	1.513	9659.86	WB
61	BoLA-3:01001	TATELNNAL	TATELNNAL	0	0	0	0	0	TATELNNAL	Esat-6	0.129876	0.539	0.162902	0.623	8580.22	WB
21	BoLA-3:01001	NVTSIHSLL	NVTSIHSLL	0	0	0	0	0	NVTSIHSLL	Esat-6	0.12138	0.605	0.193146	0.288	6185.61	WB
31	BoLA-3:01001	EGKQSLTKL	EGKQSLTKL	0	0	0	0	0	EGKQSLTKL	Esat-6	0.103397	0.784	0.099567	3.733	17025.8	WB
28	BoLA-3:01001	LLDEGKQSL	LLDEGKQSL	0	0	0	0	0	LLDEGKQSL	Esat-6	0.0933	0.937	0.102172	3.44	16552.6	WB
75	BoLA-3:01001	TISEAGQAM	TISEAGQAM	0	0	0	0	0	TISEAGQAM	Esat-6	0.082991	1.116	0.126026	1.696	12787.3	WB
64	BoLA-3:01001	ELNNALQNL	ELNNALQNL	0	0	0	0	0	ELNNALQNL	Esat-6	0.064103	1.571	0.103234	3.341	16363.5	WB
46	BoLA-3:01101	SGSEAYQGV	SGSEAYQGV	0	0	0	0	0	SGSEAYQGV	Esat-6	0.30529	0.633	0.370835	0.694	904.54	WB
20	BoLA-3:01101	GNVTSIHSL	GNVTSIHSL	0	0	0	0	0	GNVTSIHSL	Esat-6	0.269858	0.803	0.230605	3.717	4124.43	WB
14	BoLA-3:01101	AASAIQGNV	AASAIQGNV	0	0	0	0	0	AASAIQGNV	Esat-6	0.211488	1.181	0.303739	1.543	1869.43	WB
50	BoLA-3:01101	AYQGVQQKW	AYQGVQQKW	0	0	0	0	0	AYQGVQQKW	Esat-6	0.194521	1.312	0.168249	7.876	8097.91	WB
68	BoLA-3:01101	ALQNLARTI	ALQNLARTI	0	0	0	0	0	ALQNLARTI	Esat-6	0.18966	1.354	0.2748	2.23	2556.78	WB
17	BoLA-3:01101	AIQGNVTSI	AIQGNVTSI	0	0	0	0	0	AIQGNVTSI	Esat-6	0.170066	1.543	0.211484	4.69	5072.39	WB
31	BoLA-3:01101	EGKQSLTKL	EGKQSLTKL	0	0	0	0	0	EGKQSLTKL	Esat-6	0.162253	1.638	0.12803	13.406	12513	WB
46	BoLA-3:01701	SGSEAYQGV	SGSEAYQGV	0	0	0	0	0	SGSEAYQGV	Esat-6	0.613057	0.036	0.568395	0.049	106.68	SB
9	BoLA-3:01701	AGIEAAASA	AGIEAAASA	0	0	0	0	0	AGIEAAASA	Esat-6	0.529048	0.069	0.558513	0.062	118.72	SB
31	BoLA-3:01701	EGKQSLTKL	EGKQSLTKL	0	0	0	0	0	EGKQSLTKL	Esat-6	0.217846	0.588	0.241394	3.421	3670.01	WB
87	BoLA-3:01701	EGNVTGMFA	EGNVTGMFA	0	0	0	0	0	EGNVTGMFA	Esat-6	0.209711	0.62	0.410678	0.55	587.77	WB
52	BoLA-3:01701	QGVQQKWDA	QGVQQKWDA	0	0	0	0	0	QGVQQKWDA	Esat-6	0.112935	1.324	0.308561	1.559	1774.4	WB
61	BoLA-3:01701	TATELNNAL	TATELNNAL	0	0	0	0	0	TATELNNAL	Esat-6	0.107858	1.398	0.222522	4.373	4501.38	WB
46	BoLA-3:01702	SGSEAYQGV	SGSEAYQGV	0	0	0	0	0	SGSEAYQGV	Esat-6	0.5822	0.019	0.576994	0.029	97.21	SB
9	BoLA-3:01702	AGIEAAASA	AGIEAAASA	0	0	0	0	0	AGIEAAASA	Esat-6	0.454548	0.068	0.536264	0.069	151.04	SB
31	BoLA-3:01702	EGKQSLTKL	EGKQSLTKL	0	0	0	0	0	EGKQSLTKL	Esat-6	0.25878	0.474	0.261641	3.011	2947.99	SB
61	BoLA-3:01702	TATELNNAL	TATELNNAL	0	0	0	0	0	TATELNNAL	Esat-6	0.239941	0.562	0.300349	1.84	1939.27	WB
87	BoLA-3:01702	EGNVTGMFA	EGNVTGMFA	0	0	0	0	0	EGNVTGMFA	Esat-6	0.204176	0.751	0.399553	0.494	662.95	WB
20	BoLA-3:01702	GNVTSIHSL	GNVTSIHSL	0	0	0	0	0	GNVTSIHSL	Esat-6	0.165734	1.091	0.254501	3.304	3184.77	WB
46	BoLA-3:01703	SGSEAYQGV	SGSEAYQGV	0	0	0	0	0	SGSEAYQGV	Esat-6	0.598145	0.023	0.558618	0.03	118.59	SB
9	BoLA-3:01703	AGIEAAASA	AGIEAAASA	0	0	0	0	0	AGIEAAASA	Esat-6	0.523635	0.051	0.556165	0.032	121.78	SB
31	BoLA-3:01703	EGKQSLTKL	EGKQSLTKL	0	0	0	0	0	EGKQSLTKL	Esat-6	0.332891	0.385	0.283216	2.591	2334.25	SB
61	BoLA-3:01703	TATELNNAL	TATELNNAL	0	0	0	0	0	TATELNNAL	Esat-6	0.28643	0.599	0.3109	1.777	1730.06	WB
20	BoLA-3:01703	GNVTSIHSL	GNVTSIHSL	0	0	0	0	0	GNVTSIHSL	Esat-6	0.265877	0.726	0.296638	2.169	2018.72	WB
87	BoLA-3:01703	EGNVTGMFA	EGNVTGMFA	0	0	0	0	0	EGNVTGMFA	Esat-6	0.229287	0.99	0.378065	0.676	836.48	WB
34	BoLA-3:01703	QSLTKLAAA	QSLTKLAAA	0	0	0	0	0	QSLTKLAAA	Esat-6	0.183526	1.462	0.316958	1.623	1620.29	WB
14	BoLA-3:01703	AASAIQGNV	AASAIQGNV	0	0	0	0	0	AASAIQGNV	Esat-6	0.163616	1.796	0.286092	2.486	2262.73	WB
31	BoLA-3:02701	EGKQSLTKL	EGKQSLTKL	0	0	0	0	0	EGKQSLTKL	Esat-6	0.195719	0.438	0.155661	1.224	9279.48	SB
20	BoLA-3:02701	GNVTSIHSL	GNVTSIHSL	0	0	0	0	0	GNVTSIHSL	Esat-6	0.094695	1.491	0.125471	2.918	12864.3	WB
31	BoLA-3:02702	EGKQSLTKL	EGKQSLTKL	0	0	0	0	0	EGKQSLTKL	Esat-6	0.195719	0.438	0.155661	1.224	9279.48	SB
20	BoLA-3:02702	GNVTSIHSL	GNVTSIHSL	0	0	0	0	0	GNVTSIHSL	Esat-6	0.094695	1.491	0.125471	2.918	12864.3	WB
20	BoLA-3:03501	GNVTSIHSL	GNVTSIHSL	0	0	0	0	0	GNVTSIHSL	Esat-6	0.038027	0.317	0.063055	1.13	25274.2	SB
46	BoLA-3:03501	SGSEAYQGV	SGSEAYQGV	0	0	0	0	0	SGSEAYQGV	Esat-6	0.012156	1.546	0.063701	1.093	25098.1	WB
31	BoLA-3:03501	EGKQSLTKL	EGKQSLTKL	0	0	0	0	0	EGKQSLTKL	Esat-6	0.011301	1.683	0.028344	9.322	36794.5	WB
28	BoLA-3:03501	LLDEGKQSL	LLDEGKQSL	0	0	0	0	0	LLDEGKQSL	Esat-6	0.010634	1.802	0.028253	9.38	36830.7	WB
21	BoLA-3:03601	NVTSIHSLL	NVTSIHSLL	0	0	0	0	0	NVTSIHSLL	Esat-6	0.393364	0.095	0.289604	0.06	2178.36	SB
61	BoLA-3:03601	TATELNNAL	TATELNNAL	0	0	0	0	0	TATELNNAL	Esat-6	0.311009	0.226	0.222261	0.338	4514.11	SB
85	BoLA-3:03601	STEGNVTGM	STEGNVTGM	0	0	0	0	0	STEGNVTGM	Esat-6	0.29876	0.259	0.223125	0.332	4472.11	SB
75	BoLA-3:03601	TISEAGQAM	TISEAGQAM	0	0	0	0	0	TISEAGQAM	Esat-6	0.229386	0.57	0.190392	0.752	6372.7	WB
28	BoLA-3:03601	LLDEGKQSL	LLDEGKQSL	0	0	0	0	0	LLDEGKQSL	Esat-6	0.195699	0.799	0.117491	4.294	14024.4	WB
31	BoLA-3:03601	EGKQSLTKL	EGKQSLTKL	0	0	0	0	0	EGKQSLTKL	Esat-6	0.182181	0.947	0.115424	4.528	14341.5	WB
17	BoLA-3:03601	AIQGNVTSI	AIQGNVTSI	0	0	0	0	0	AIQGNVTSI	Esat-6	0.163247	1.166	0.147164	2.064	10173	WB
14	BoLA-3:03601	AASAIQGNV	AASAIQGNV	0	0	0	0	0	AASAIQGNV	Esat-6	0.155527	1.273	0.202066	0.561	5616.53	WB
20	BoLA-3:03601	GNVTSIHSL	GNVTSIHSL	0	0	0	0	0	GNVTSIHSL	Esat-6	0.1554	1.274	0.135268	2.73	11570.4	WB
64	BoLA-3:03601	ELNNALQNL	ELNNALQNL	0	0	0	0	0	ELNNALQNL	Esat-6	0.133604	1.647	0.140489	2.411	10934.9	WB
50	BoLA-3:03701	AYQGVQQKW	AYQGVQQKW	0	0	0	0	0	AYQGVQQKW	Esat-6	0.34287	0.382	0.257496	1.568	3083.22	SB
20	BoLA-3:03701	GNVTSIHSL	GNVTSIHSL	0	0	0	0	0	GNVTSIHSL	Esat-6	0.263826	0.837	0.236885	2.255	3853.49	WB
61	BoLA-3:03701	TATELNNAL	TATELNNAL	0	0	0	0	0	TATELNNAL	Esat-6	0.214064	1.401	0.256375	1.601	3120.84	WB
21	BoLA-3:03701	NVTSIHSLL	NVTSIHSLL	0	0	0	0	0	NVTSIHSLL	Esat-6	0.213162	1.415	0.284761	0.943	2295.55	WB
35	BoLA-3:03701	SLTKLAAAW	SLTKLAAAW	0	0	0	0	0	SLTKLAAAW	Esat-6	0.208194	1.495	0.291431	0.842	2135.72	WB
49	BoLA-3:03701	EAYQGVQQK	EAYQGVQQK	0	0	0	0	0	EAYQGVQQK	Esat-6	0.199396	1.641	0.188554	5.387	6500.71	WB
31	BoLA-3:03801	EGKQSLTKL	EGKQSLTKL	0	0	0	0	0	EGKQSLTKL	Esat-6	0.229741	0.144	0.201219	1.072	5668.23	SB
61	BoLA-3:03801	TATELNNAL	TATELNNAL	0	0	0	0	0	TATELNNAL	Esat-6	0.168962	0.353	0.251012	0.355	3307.29	SB
20	BoLA-3:03801	GNVTSIHSL	GNVTSIHSL	0	0	0	0	0	GNVTSIHSL	Esat-6	0.153107	0.451	0.186601	1.469	6639.53	SB
21	BoLA-3:03801	NVTSIHSLL	NVTSIHSLL	0	0	0	0	0	NVTSIHSLL	Esat-6	0.148272	0.488	0.26979	0.225	2699.2	SB
28	BoLA-3:03801	LLDEGKQSL	LLDEGKQSL	0	0	0	0	0	LLDEGKQSL	Esat-6	0.105373	1.046	0.116729	7.213	14140.5	WB
46	BoLA-3:03801	SGSEAYQGV	SGSEAYQGV	0	0	0	0	0	SGSEAYQGV	Esat-6	0.095634	1.249	0.226037	0.624	4333.4	WB
31	BoLA-3:05001	EGKQSLTKL	EGKQSLTKL	0	0	0	0	0	EGKQSLTKL	Esat-6	0.378434	0.228	0.247233	2.668	3445.32	SB
6	BoLA-3:05001	WNFAGIEAA	WNFAGIEAA	0	0	0	0	0	WNFAGIEAA	Esat-6	0.34016	0.308	0.51864	0.02	182.77	SB
34	BoLA-3:05001	QSLTKLAAA	QSLTKLAAA	0	0	0	0	0	QSLTKLAAA	Esat-6	0.267418	0.538	0.348223	0.487	1155.26	WB
65	BoLA-3:05001	LNNALQNLA	LNNALQNLA	0	0	0	0	0	LNNALQNLA	Esat-6	0.24655	0.636	0.384378	0.261	781.25	WB
20	BoLA-3:05001	GNVTSIHSL	GNVTSIHSL	0	0	0	0	0	GNVTSIHSL	Esat-6	0.236321	0.683	0.250711	2.506	3318.08	WB
49	BoLA-3:05001	EAYQGVQQK	EAYQGVQQK	0	0	0	0	0	EAYQGVQQK	Esat-6	0.1328	1.847	0.150258	13.673	9838.12	WB
31	BoLA-3:05002	EGKQSLTKL	EGKQSLTKL	0	0	0	0	0	EGKQSLTKL	Esat-6	0.357811	0.049	0.238257	1.092	3796.71	SB
20	BoLA-3:05002	GNVTSIHSL	GNVTSIHSL	0	0	0	0	0	GNVTSIHSL	Esat-6	0.224927	0.34	0.241886	1.013	3650.52	SB
61	BoLA-3:05002	TATELNNAL	TATELNNAL	0	0	0	0	0	TATELNNAL	Esat-6	0.162644	0.823	0.218382	1.692	4707.6	WB
46	BoLA-3:05002	SGSEAYQGV	SGSEAYQGV	0	0	0	0	0	SGSEAYQGV	Esat-6	0.162083	0.829	0.285557	0.395	2275.86	WB
34	BoLA-3:05002	QSLTKLAAA	QSLTKLAAA	0	0	0	0	0	QSLTKLAAA	Esat-6	0.126808	1.36	0.269317	0.564	2713.05	WB
21	BoLA-3:05002	NVTSIHSLL	NVTSIHSLL	0	0	0	0	0	NVTSIHSLL	Esat-6	0.104084	1.919	0.222464	1.553	4504.21	WB
20	BoLA-3:05101	GNVTSIHSL	GNVTSIHSL	0	0	0	0	0	GNVTSIHSL	Esat-6	0.136582	0.58	0.171438	4.813	7823.27	WB
50	BoLA-3:05101	AYQGVQQKW	AYQGVQQKW	0	0	0	0	0	AYQGVQQKW	Esat-6	0.116192	0.774	0.145337	7.902	10376.1	WB
31	BoLA-3:05101	EGKQSLTKL	EGKQSLTKL	0	0	0	0	0	EGKQSLTKL	Esat-6	0.082662	1.38	0.116012	14.186	14250.6	WB
46	BoLA-3:05101	SGSEAYQGV	SGSEAYQGV	0	0	0	0	0	SGSEAYQGV	Esat-6	0.080746	1.43	0.251578	1.1	3287.1	WB
43	BoLA-3:05101	WGGSGSEAY	WGGSGSEAY	0	0	0	0	0	WGGSGSEAY	Esat-6	0.072044	1.698	0.244049	1.253	3566.08	WB
21	BoLA-3:05201	NVTSIHSLL	NVTSIHSLL	0	0	0	0	0	NVTSIHSLL	Esat-6	0.183097	0.572	0.212319	0.682	5026.77	WB
28	BoLA-3:05201	LLDEGKQSL	LLDEGKQSL	0	0	0	0	0	LLDEGKQSL	Esat-6	0.162763	0.725	0.143504	2.745	10584	WB
20	BoLA-3:05201	GNVTSIHSL	GNVTSIHSL	0	0	0	0	0	GNVTSIHSL	Esat-6	0.158303	0.76	0.169345	1.629	8002.45	WB
61	BoLA-3:05201	TATELNNAL	TATELNNAL	0	0	0	0	0	TATELNNAL	Esat-6	0.14072	0.942	0.167882	1.677	8130.13	WB
85	BoLA-3:05201	STEGNVTGM	STEGNVTGM	0	0	0	0	0	STEGNVTGM	Esat-6	0.116207	1.299	0.160377	1.958	8817.86	WB
17	BoLA-3:05201	AIQGNVTSI	AIQGNVTSI	0	0	0	0	0	AIQGNVTSI	Esat-6	0.109513	1.42	0.147012	2.547	10189.8	WB
46	BoLA-3:05201	SGSEAYQGV	SGSEAYQGV	0	0	0	0	0	SGSEAYQGV	Esat-6	0.089156	1.898	0.176586	1.407	7399.42	WB
31	BoLA-3:05301	EGKQSLTKL	EGKQSLTKL	0	0	0	0	0	EGKQSLTKL	Esat-6	0.281175	0.064	0.196257	0.464	5980.87	SB
20	BoLA-3:05301	GNVTSIHSL	GNVTSIHSL	0	0	0	0	0	GNVTSIHSL	Esat-6	0.153485	0.457	0.158923	1.245	8957.68	SB
46	BoLA-3:05301	SGSEAYQGV	SGSEAYQGV	0	0	0	0	0	SGSEAYQGV	Esat-6	0.123711	0.694	0.211408	0.297	5076.57	WB
61	BoLA-3:05301	TATELNNAL	TATELNNAL	0	0	0	0	0	TATELNNAL	Esat-6	0.081472	1.413	0.151948	1.513	9659.86	WB
20	BoLA-3:05801	GNVTSIHSL	GNVTSIHSL	0	0	0	0	0	GNVTSIHSL	Esat-6	0.271717	0.31	0.257897	1.306	3069.87	SB
50	BoLA-3:05801	AYQGVQQKW	AYQGVQQKW	0	0	0	0	0	AYQGVQQKW	Esat-6	0.255855	0.377	0.22184	2.459	4534.72	SB
31	BoLA-3:05801	EGKQSLTKL	EGKQSLTKL	0	0	0	0	0	EGKQSLTKL	Esat-6	0.180552	1.006	0.181758	4.928	6996.72	WB
61	BoLA-3:05801	TATELNNAL	TATELNNAL	0	0	0	0	0	TATELNNAL	Esat-6	0.165329	1.212	0.234191	1.98	3967.47	WB
46	BoLA-3:05801	SGSEAYQGV	SGSEAYQGV	0	0	0	0	0	SGSEAYQGV	Esat-6	0.150106	1.467	0.324244	0.406	1497.47	WB
35	BoLA-3:05801	SLTKLAAAW	SLTKLAAAW	0	0	0	0	0	SLTKLAAAW	Esat-6	0.145126	1.562	0.291558	0.719	2132.79	WB
31	BoLA-3:05901	EGKQSLTKL	EGKQSLTKL	0	0	0	0	0	EGKQSLTKL	Esat-6	0.210397	0.186	0.139442	0.77	11059.5	SB
20	BoLA-3:05901	GNVTSIHSL	GNVTSIHSL	0	0	0	0	0	GNVTSIHSL	Esat-6	0.09578	1.094	0.108647	2.288	15432.7	WB
20	BoLA-3:06501	GNVTSIHSL	GNVTSIHSL	0	0	0	0	0	GNVTSIHSL	Esat-6	0.411833	0.425	0.298719	1.358	1973.78	SB
57	BoLA-3:06501	KWDATATEL	KWDATATEL	0	0	0	0	0	KWDATATEL	Esat-6	0.402083	0.461	0.298503	1.362	1978.4	SB
28	BoLA-3:06501	LLDEGKQSL	LLDEGKQSL	0	0	0	0	0	LLDEGKQSL	Esat-6	0.32251	0.953	0.205541	5.772	5409.27	WB
50	BoLA-3:06501	AYQGVQQKW	AYQGVQQKW	0	0	0	0	0	AYQGVQQKW	Esat-6	0.281559	1.343	0.182001	8.077	6978.35	WB
61	BoLA-3:06501	TATELNNAL	TATELNNAL	0	0	0	0	0	TATELNNAL	Esat-6	0.248704	1.766	0.247998	3.023	3416.92	WB
46	BoLA-3:06501	SGSEAYQGV	SGSEAYQGV	0	0	0	0	0	SGSEAYQGV	Esat-6	0.246283	1.802	0.330982	0.795	1392.18	WB
21	BoLA-3:06501	NVTSIHSLL	NVTSIHSLL	0	0	0	0	0	NVTSIHSLL	Esat-6	0.244433	1.829	0.2622	2.415	2930.22	WB
20	BoLA-3:06601	GNVTSIHSL	GNVTSIHSL	0	0	0	0	0	GNVTSIHSL	Esat-6	0.260219	0.576	0.214158	2.434	4927.74	WB
61	BoLA-3:06601	TATELNNAL	TATELNNAL	0	0	0	0	0	TATELNNAL	Esat-6	0.184605	1.213	0.20941	2.636	5187.51	WB
21	BoLA-3:06601	NVTSIHSLL	NVTSIHSLL	0	0	0	0	0	NVTSIHSLL	Esat-6	0.182453	1.239	0.237077	1.647	3845.5	WB
17	BoLA-3:06601	AIQGNVTSI	AIQGNVTSI	0	0	0	0	0	AIQGNVTSI	Esat-6	0.154682	1.646	0.194025	3.382	6127.06	WB
28	BoLA-3:06601	LLDEGKQSL	LLDEGKQSL	0	0	0	0	0	LLDEGKQSL	Esat-6	0.148547	1.761	0.146366	7.361	10261.3	WB
20	BoLA-3:06602	GNVTSIHSL	GNVTSIHSL	0	0	0	0	0	GNVTSIHSL	Esat-6	0.29951	0.488	0.206503	1.783	5353.26	SB
61	BoLA-3:06602	TATELNNAL	TATELNNAL	0	0	0	0	0	TATELNNAL	Esat-6	0.212256	1.107	0.192308	2.369	6241.95	WB
21	BoLA-3:06602	NVTSIHSLL	NVTSIHSLL	0	0	0	0	0	NVTSIHSLL	Esat-6	0.196323	1.302	0.213927	1.548	4940.07	WB
28	BoLA-3:06602	LLDEGKQSL	LLDEGKQSL	0	0	0	0	0	LLDEGKQSL	Esat-6	0.183202	1.466	0.136054	6.67	11472.5	WB
17	BoLA-3:06602	AIQGNVTSI	AIQGNVTSI	0	0	0	0	0	AIQGNVTSI	Esat-6	0.17974	1.511	0.176977	3.159	7368.18	WB
57	BoLA-3:06602	KWDATATEL	KWDATATEL	0	0	0	0	0	KWDATATEL	Esat-6	0.169303	1.679	0.158434	4.403	9005.2	WB
46	BoLA-3:06602	SGSEAYQGV	SGSEAYQGV	0	0	0	0	0	SGSEAYQGV	Esat-6	0.15464	1.974	0.221259	1.338	4563.32	WB
21	BoLA-3:06801	NVTSIHSLL	NVTSIHSLL	0	0	0	0	0	NVTSIHSLL	Esat-6	0.343488	0.202	0.282363	0.368	2355.89	SB
20	BoLA-3:06801	GNVTSIHSL	GNVTSIHSL	0	0	0	0	0	GNVTSIHSL	Esat-6	0.330067	0.236	0.252695	0.662	3247.61	SB
85	BoLA-3:06801	STEGNVTGM	STEGNVTGM	0	0	0	0	0	STEGNVTGM	Esat-6	0.30182	0.332	0.257162	0.602	3094.38	SB
61	BoLA-3:06801	TATELNNAL	TATELNNAL	0	0	0	0	0	TATELNNAL	Esat-6	0.239388	0.681	0.212815	1.492	4999.87	WB
17	BoLA-3:06801	AIQGNVTSI	AIQGNVTSI	0	0	0	0	0	AIQGNVTSI	Esat-6	0.231403	0.742	0.238462	0.888	3788.3	WB
31	BoLA-3:06801	EGKQSLTKL	EGKQSLTKL	0	0	0	0	0	EGKQSLTKL	Esat-6	0.185465	1.177	0.141437	6.133	10823.4	WB
75	BoLA-3:06801	TISEAGQAM	TISEAGQAM	0	0	0	0	0	TISEAGQAM	Esat-6	0.178435	1.278	0.176567	3.033	7400.94	WB
35	BoLA-3:06801	SLTKLAAAW	SLTKLAAAW	0	0	0	0	0	SLTKLAAAW	Esat-6	0.166498	1.461	0.221122	1.27	4570.08	WB
28	BoLA-3:06801	LLDEGKQSL	LLDEGKQSL	0	0	0	0	0	LLDEGKQSL	Esat-6	0.153306	1.712	0.113658	10.691	14618.2	WB
28	BoLA-3:07301	LLDEGKQSL	LLDEGKQSL	0	0	0	0	0	LLDEGKQSL	Esat-6	0.29885	0.131	0.225381	0.53	4364.27	SB
17	BoLA-3:07301	AIQGNVTSI	AIQGNVTSI	0	0	0	0	0	AIQGNVTSI	Esat-6	0.260888	0.204	0.260915	0.301	2971.24	SB
68	BoLA-3:07301	ALQNLARTI	ALQNLARTI	0	0	0	0	0	ALQNLARTI	Esat-6	0.189012	0.449	0.224071	0.542	4426.57	SB
61	BoLA-3:07301	TATELNNAL	TATELNNAL	0	0	0	0	0	TATELNNAL	Esat-6	0.14804	0.717	0.19088	0.932	6339.14	WB
21	BoLA-3:07301	NVTSIHSLL	NVTSIHSLL	0	0	0	0	0	NVTSIHSLL	Esat-6	0.110056	1.11	0.178982	1.145	7210.06	WB
75	BoLA-3:07301	TISEAGQAM	TISEAGQAM	0	0	0	0	0	TISEAGQAM	Esat-6	0.089346	1.454	0.169253	1.328	8010.42	WB
64	BoLA-3:07301	ELNNALQNL	ELNNALQNL	0	0	0	0	0	ELNNALQNL	Esat-6	0.087848	1.485	0.159459	1.534	8905.88	WB
35	BoLA-3:07301	SLTKLAAAW	SLTKLAAAW	0	0	0	0	0	SLTKLAAAW	Esat-6	0.071621	1.895	0.165368	1.402	8354.31	WB
50	BoLA-4:02401	AYQGVQQKW	AYQGVQQKW	0	0	0	0	0	AYQGVQQKW	Esat-6	0.881812	0.013	0.316894	0.119	1621.42	SB
35	BoLA-4:02401	SLTKLAAAW	SLTKLAAAW	0	0	0	0	0	SLTKLAAAW	Esat-6	0.781251	0.039	0.436966	0.016	442.26	SB
50	BoLA-4:02402	AYQGVQQKW	AYQGVQQKW	0	0	0	0	0	AYQGVQQKW	Esat-6	0.87531	0.018	0.354582	0.307	1078.45	SB
35	BoLA-4:02402	SLTKLAAAW	SLTKLAAAW	0	0	0	0	0	SLTKLAAAW	Esat-6	0.755818	0.069	0.51279	0.023	194.71	SB
61	BoLA-4:06301	TATELNNAL	TATELNNAL	0	0	0	0	0	TATELNNAL	Esat-6	0.124874	0.492	0.114746	1.009	14447.1	SB
21	BoLA-4:06301	NVTSIHSLL	NVTSIHSLL	0	0	0	0	0	NVTSIHSLL	Esat-6	0.11661	0.56	0.133264	0.609	11824	WB
17	BoLA-4:06301	AIQGNVTSI	AIQGNVTSI	0	0	0	0	0	AIQGNVTSI	Esat-6	0.081967	0.974	0.080666	2.821	20889.2	WB
28	BoLA-4:06301	LLDEGKQSL	LLDEGKQSL	0	0	0	0	0	LLDEGKQSL	Esat-6	0.080464	1.001	0.071772	3.734	22999.3	WB
20	BoLA-4:06301	GNVTSIHSL	GNVTSIHSL	0	0	0	0	0	GNVTSIHSL	Esat-6	0.071701	1.16	0.068574	4.158	23809.1	WB
85	BoLA-4:06301	STEGNVTGM	STEGNVTGM	0	0	0	0	0	STEGNVTGM	Esat-6	0.061982	1.377	0.087961	2.245	19303.8	WB
31	BoLA-4:06301	EGKQSLTKL	EGKQSLTKL	0	0	0	0	0	EGKQSLTKL	Esat-6	0.058343	1.476	0.048518	8.421	29579.1	WB
14	BoLA-4:06301	AASAIQGNV	AASAIQGNV	0	0	0	0	0	AASAIQGNV	Esat-6	0.049487	1.775	0.105734	1.287	15926.8	WB
28	BoLA-5:00301	LLDEGKQSL	LLDEGKQSL	0	0	0	0	0	LLDEGKQSL	Esat-6	0.486308	0.095	0.310476	0.974	1738.01	SB
17	BoLA-5:00301	AIQGNVTSI	AIQGNVTSI	0	0	0	0	0	AIQGNVTSI	Esat-6	0.433851	0.165	0.375348	0.315	861.43	SB
68	BoLA-5:00301	ALQNLARTI	ALQNLARTI	0	0	0	0	0	ALQNLARTI	Esat-6	0.411166	0.21	0.39024	0.235	733.24	SB
57	BoLA-5:00301	KWDATATEL	KWDATATEL	0	0	0	0	0	KWDATATEL	Esat-6	0.393311	0.259	0.326928	0.737	1454.6	SB
20	BoLA-5:00301	GNVTSIHSL	GNVTSIHSL	0	0	0	0	0	GNVTSIHSL	Esat-6	0.21964	1.371	0.230162	3.731	4144.25	WB
17	BoLA-5:03901	AIQGNVTSI	AIQGNVTSI	0	0	0	0	0	AIQGNVTSI	Esat-6	0.141773	0.348	0.108183	0.492	15510.3	SB
28	BoLA-5:03901	LLDEGKQSL	LLDEGKQSL	0	0	0	0	0	LLDEGKQSL	Esat-6	0.125093	0.458	0.067655	2.348	24047	SB
57	BoLA-5:03901	KWDATATEL	KWDATATEL	0	0	0	0	0	KWDATATEL	Esat-6	0.120129	0.494	0.077241	1.572	21677.9	SB
61	BoLA-5:03901	TATELNNAL	TATELNNAL	0	0	0	0	0	TATELNNAL	Esat-6	0.070389	1.391	0.066543	2.458	24338.1	WB
21	BoLA-5:03901	NVTSIHSLL	NVTSIHSLL	0	0	0	0	0	NVTSIHSLL	Esat-6	0.067807	1.483	0.065837	2.534	24524.7	WB
17	BoLA-5:06401	AIQGNVTSI	AIQGNVTSI	0	0	0	0	0	AIQGNVTSI	Esat-6	0.132602	0.154	0.147761	0.281	10107.5	SB
28	BoLA-5:06401	LLDEGKQSL	LLDEGKQSL	0	0	0	0	0	LLDEGKQSL	Esat-6	0.118875	0.208	0.113487	0.821	14645.3	SB
68	BoLA-5:06401	ALQNLARTI	ALQNLARTI	0	0	0	0	0	ALQNLARTI	Esat-6	0.063679	0.672	0.110847	0.891	15069.6	WB
20	BoLA-5:06401	GNVTSIHSL	GNVTSIHSL	0	0	0	0	0	GNVTSIHSL	Esat-6	0.055086	0.836	0.082592	2.103	20458.5	WB
57	BoLA-5:06401	KWDATATEL	KWDATATEL	0	0	0	0	0	KWDATATEL	Esat-6	0.053802	0.865	0.101098	1.184	16746.1	WB
85	BoLA-5:06401	STEGNVTGM	STEGNVTGM	0	0	0	0	0	STEGNVTGM	Esat-6	0.043949	1.131	0.08843	1.74	19206.1	WB
21	BoLA-5:06401	NVTSIHSLL	NVTSIHSLL	0	0	0	0	0	NVTSIHSLL	Esat-6	0.030149	1.759	0.069211	3.309	23645.6	WB
35	BoLA-5:06401	SLTKLAAAW	SLTKLAAAW	0	0	0	0	0	SLTKLAAAW	Esat-6	0.029162	1.819	0.094644	1.437	17957.3	WB
14	BoLA-5:06401	AASAIQGNV	AASAIQGNV	0	0	0	0	0	AASAIQGNV	Esat-6	0.02908	1.825	0.083557	2.029	20246	WB
61	BoLA-5:06401	TATELNNAL	TATELNNAL	0	0	0	0	0	TATELNNAL	Esat-6	0.027342	1.953	0.074493	2.769	22332.1	WB
28	BoLA-5:07201	LLDEGKQSL	LLDEGKQSL	0	0	0	0	0	LLDEGKQSL	Esat-6	0.254224	0.116	0.185236	0.864	6738.32	SB
17	BoLA-5:07201	AIQGNVTSI	AIQGNVTSI	0	0	0	0	0	AIQGNVTSI	Esat-6	0.219226	0.196	0.237747	0.272	3817.72	SB
68	BoLA-5:07201	ALQNLARTI	ALQNLARTI	0	0	0	0	0	ALQNLARTI	Esat-6	0.110849	0.917	0.184252	0.885	6810.44	WB
57	BoLA-5:07201	KWDATATEL	KWDATATEL	0	0	0	0	0	KWDATATEL	Esat-6	0.100875	1.081	0.171128	1.16	7849.55	WB
61	BoLA-5:07201	TATELNNAL	TATELNNAL	0	0	0	0	0	TATELNNAL	Esat-6	0.099673	1.104	0.148715	1.85	10003.7	WB
85	BoLA-5:07201	STEGNVTGM	STEGNVTGM	0	0	0	0	0	STEGNVTGM	Esat-6	0.095739	1.189	0.145129	1.985	10399.5	WB
20	BoLA-5:07201	GNVTSIHSL	GNVTSIHSL	0	0	0	0	0	GNVTSIHSL	Esat-6	0.080944	1.556	0.114413	3.899	14499.3	WB
21	BoLA-5:07201	NVTSIHSLL	NVTSIHSLL	0	0	0	0	0	NVTSIHSLL	Esat-6	0.079721	1.591	0.135585	2.435	11530.8	WB
77	BoLA-6:01401	SEAGQAMAS	SEAGQAMAS	0	0	0	0	0	SEAGQAMAS	Esat-6	0.140173	1.048	0.266307	0.864	2802.86	WB
33	BoLA-6:01401	KQSLTKLAA	KQSLTKLAA	0	0	0	0	0	KQSLTKLAA	Esat-6	0.087646	1.807	0.215901	1.728	4835.68	WB
77	BoLA-6:01402	SEAGQAMAS	SEAGQAMAS	0	0	0	0	0	SEAGQAMAS	Esat-6	0.339671	0.996	0.408158	0.975	604.02	WB
28	BoLA-6:01501	LLDEGKQSL	LLDEGKQSL	0	0	0	0	0	LLDEGKQSL	Esat-6	0.071514	0.622	0.09404	2.386	18075	WB
3	BoLA-6:01501	EQQWNFAGI	EQQWNFAGI	0	0	0	0	0	EQQWNFAGI	Esat-6	0.051609	0.951	0.209673	0.111	5172.77	WB
68	BoLA-6:01501	ALQNLARTI	ALQNLARTI	0	0	0	0	0	ALQNLARTI	Esat-6	0.03657	1.415	0.132312	0.782	11946.5	WB
28	BoLA-6:01502	LLDEGKQSL	LLDEGKQSL	0	0	0	0	0	LLDEGKQSL	Esat-6	0.076817	0.272	0.10461	1.467	16121.7	SB
68	BoLA-6:01502	ALQNLARTI	ALQNLARTI	0	0	0	0	0	ALQNLARTI	Esat-6	0.033959	0.915	0.139752	0.533	11022.5	WB
3	BoLA-6:01502	EQQWNFAGI	EQQWNFAGI	0	0	0	0	0	EQQWNFAGI	Esat-6	0.032576	0.964	0.190707	0.139	6351.02	WB
17	BoLA-6:01502	AIQGNVTSI	AIQGNVTSI	0	0	0	0	0	AIQGNVTSI	Esat-6	0.01912	1.758	0.105126	1.445	16031.9	WB
86	BoLA-6:03401	TEGNVTGMF	TEGNVTGMF	0	0	0	0	0	TEGNVTGMF	Esat-6	0.086619	0.91	0.161133	0.653	8746.03	WB
28	BoLA-6:03401	LLDEGKQSL	LLDEGKQSL	0	0	0	0	0	LLDEGKQSL	Esat-6	0.044851	1.716	0.067513	4.919	24084	WB
77	BoLA-6:03401	SEAGQAMAS	SEAGQAMAS	0	0	0	0	0	SEAGQAMAS	Esat-6	0.037273	1.97	0.116899	1.493	14114.5	WB
57	BoLA-6:04001	KWDATATEL	KWDATATEL	0	0	0	0	0	KWDATATEL	Esat-6	0.142973	1.261	0.107979	4.518	15544.6	WB
20	BoLA-6:04001	GNVTSIHSL	GNVTSIHSL	0	0	0	0	0	GNVTSIHSL	Esat-6	0.10638	1.909	0.094668	6.132	17952.6	WB
86	BoLA-6:04101	TEGNVTGMF	TEGNVTGMF	0	0	0	0	0	TEGNVTGMF	Esat-6	0.061497	1.309	0.173805	1.395	7625.45	WB
3	BoLA-6:04101	EQQWNFAGI	EQQWNFAGI	0	0	0	0	0	EQQWNFAGI	Esat-6	0.05218	1.491	0.294718	0.305	2061.1	WB
35	BoLA-amani.1	SLTKLAAAW	SLTKLAAAW	0	0	0	0	0	SLTKLAAAW	Esat-6	0.468713	0.336	0.279792	0.281	2422.34	SB
50	BoLA-amani.1	AYQGVQQKW	AYQGVQQKW	0	0	0	0	0	AYQGVQQKW	Esat-6	0.325102	0.606	0.135276	1.626	11569.4	WB
31	BoLA-gb1.7	EGKQSLTKL	EGKQSLTKL	0	0	0	0	0	EGKQSLTKL	Esat-6	0.281175	0.064	0.196257	0.464	5980.87	SB
20	BoLA-gb1.7	GNVTSIHSL	GNVTSIHSL	0	0	0	0	0	GNVTSIHSL	Esat-6	0.153485	0.457	0.158923	1.245	8957.68	SB
46	BoLA-gb1.7	SGSEAYQGV	SGSEAYQGV	0	0	0	0	0	SGSEAYQGV	Esat-6	0.123711	0.694	0.211408	0.297	5076.57	WB
61	BoLA-gb1.7	TATELNNAL	TATELNNAL	0	0	0	0	0	TATELNNAL	Esat-6	0.081472	1.413	0.151948	1.513	9659.86	WB
64	BoLA-HD6	KQKQELDEI	KQKQELDEI	0	0	0	0	0	KQKQELDEI	Cfp-10	0.873963	0.075	0.676465	0.152	33.13	SB
90	BoLA-HD6	QQQALSSQM	QQQALSSQM	0	0	0	0	0	QQQALSSQM	Cfp-10	0.442072	0.616	0.491466	0.831	245.24	WB
3	BoLA-HD6	EMKTDAATL	EMKTDAATL	0	0	0	0	0	EMKTDAATL	Cfp-10	0.281165	1.072	0.424285	1.364	507.3	WB
61	BoLA-HD6	AANKQKQEL	AANKQKQEL	0	0	0	0	0	AANKQKQEL	Cfp-10	0.245352	1.241	0.247112	4.96	3449.83	WB
90	BoLA-JSP.1	QQQALSSQM	QQQALSSQM	0	0	0	0	0	QQQALSSQM	Cfp-10	0.171957	1.575	0.134655	4.052	11647.4	WB
21	BoLA-JSP.1	ISGDLKTQI	ISGDLKTQI	0	0	0	0	0	ISGDLKTQI	Cfp-10	0.167529	1.63	0.136049	3.944	11473.1	WB
3	BoLA-T2c	EMKTDAATL	EMKTDAATL	0	0	0	0	0	EMKTDAATL	Cfp-10	0.910423	0.1	0.670855	0.139	35.21	SB
68	BoLA-T2c	ELDEISTNI	ELDEISTNI	0	0	0	0	0	ELDEISTNI	Cfp-10	0.686915	0.576	0.468736	0.759	313.61	WB
61	BoLA-T2c	AANKQKQEL	AANKQKQEL	0	0	0	0	0	AANKQKQEL	Cfp-10	0.581785	0.946	0.254805	3.516	3174.31	WB
24	BoLA-T2c	DLKTQIDQV	DLKTQIDQV	0	0	0	0	0	DLKTQIDQV	Cfp-10	0.503747	1.342	0.329553	2.059	1413.87	WB
31	BoLA-T2c	QVESTAGSL	QVESTAGSL	0	0	0	0	0	QVESTAGSL	Cfp-10	0.503417	1.344	0.349956	1.784	1133.8	WB
90	BoLA-T2c	QQQALSSQM	QQQALSSQM	0	0	0	0	0	QQQALSSQM	Cfp-10	0.502601	1.349	0.322898	2.167	1519.43	WB
10	BoLA-T2c	TLAQEAGNF	TLAQEAGNF	0	0	0	0	0	TLAQEAGNF	Cfp-10	0.434628	1.764	0.364072	1.616	973.21	WB
13	BoLA-T2b	QEAGNFERI	QEAGNFERI	0	0	0	0	0	QEAGNFERI	Cfp-10	0.270712	0.257	0.330129	0.19	1405.09	SB
90	BoLA-T2b	QQQALSSQM	QQQALSSQM	0	0	0	0	0	QQQALSSQM	Cfp-10	0.098283	0.878	0.205299	0.908	5423.46	WB
64	BoLA-T2b	KQKQELDEI	KQKQELDEI	0	0	0	0	0	KQKQELDEI	Cfp-10	0.097321	0.885	0.17471	1.379	7551.14	WB
3	BoLA-T2b	EMKTDAATL	EMKTDAATL	0	0	0	0	0	EMKTDAATL	Cfp-10	0.06353	1.278	0.208986	0.868	5211.36	WB
86	BoLA-T2b	ADEEQQQAL	ADEEQQQAL	0	0	0	0	0	ADEEQQQAL	Cfp-10	0.062949	1.286	0.091947	5.645	18489	WB
61	BoLA-T2b	AANKQKQEL	AANKQKQEL	0	0	0	0	0	AANKQKQEL	Cfp-10	0.037179	1.937	0.082331	7.093	20516.3	WB
77	BoLA-T2a	RQAGVQYSR	RQAGVQYSR	0	0	0	0	0	RQAGVQYSR	Cfp-10	0.308299	1.329	0.161678	2.637	8694.61	WB
49	BoLA-T2a	TAAQAAVVR	TAAQAAVVR	0	0	0	0	0	TAAQAAVVR	Cfp-10	0.265182	1.588	0.144504	3.316	10470.1	WB
3	BoLA-T7	EMKTDAATL	EMKTDAATL	0	0	0	0	0	EMKTDAATL	Cfp-10	0.248068	0.307	0.220157	0.498	4618.05	SB
68	BoLA-T7	ELDEISTNI	ELDEISTNI	0	0	0	0	0	ELDEISTNI	Cfp-10	0.220529	0.43	0.185034	1.094	6753.06	SB
61	BoLA-T7	AANKQKQEL	AANKQKQEL	0	0	0	0	0	AANKQKQEL	Cfp-10	0.20258	0.527	0.117556	4.602	14014.5	WB
73	BoLA-T7	STNIRQAGV	STNIRQAGV	0	0	0	0	0	STNIRQAGV	Cfp-10	0.18724	0.64	0.24212	0.29	3641.29	WB
31	BoLA-T7	QVESTAGSL	QVESTAGSL	0	0	0	0	0	QVESTAGSL	Cfp-10	0.128307	1.354	0.163139	1.789	8558.25	WB
21	BoLA-T7	ISGDLKTQI	ISGDLKTQI	0	0	0	0	0	ISGDLKTQI	Cfp-10	0.126545	1.382	0.121297	4.25	13458.6	WB
24	BoLA-T7	DLKTQIDQV	DLKTQIDQV	0	0	0	0	0	DLKTQIDQV	Cfp-10	0.108831	1.743	0.105689	5.939	15934.6	WB
90	BoLA-D18.4	QQQALSSQM	QQQALSSQM	0	0	0	0	0	QQQALSSQM	Cfp-10	0.626551	0.213	0.414087	0.251	566.48	SB
64	BoLA-D18.4	KQKQELDEI	KQKQELDEI	0	0	0	0	0	KQKQELDEI	Cfp-10	0.351965	0.798	0.230916	2.349	4110.57	WB
77	BoLA-D18.4	RQAGVQYSR	RQAGVQYSR	0	0	0	0	0	RQAGVQYSR	Cfp-10	0.248304	1.299	0.219568	2.693	4647.58	WB
75	BoLA-D18.4	NIRQAGVQY	NIRQAGVQY	0	0	0	0	0	NIRQAGVQY	Cfp-10	0.243658	1.329	0.217596	2.762	4747.81	WB
61	BoLA-D18.4	AANKQKQEL	AANKQKQEL	0	0	0	0	0	AANKQKQEL	Cfp-10	0.233766	1.393	0.153746	6.461	9473.75	WB
21	BoLA-AW10	ISGDLKTQI	ISGDLKTQI	0	0	0	0	0	ISGDLKTQI	Cfp-10	0.047107	0.842	0.057934	4.173	26714.1	WB
61	BoLA-AW10	AANKQKQEL	AANKQKQEL	0	0	0	0	0	AANKQKQEL	Cfp-10	0.043869	0.937	0.042378	8.72	31610.9	WB
47	BoLA-AW10	AGTAAQAAV	AGTAAQAAV	0	0	0	0	0	AGTAAQAAV	Cfp-10	0.027241	1.783	0.096951	0.902	17514.6	WB
90	BoLA-T5	QQQALSSQM	QQQALSSQM	0	0	0	0	0	QQQALSSQM	Cfp-10	0.300754	0.378	0.292646	0.602	2107.83	SB
77	BoLA-T5	RQAGVQYSR	RQAGVQYSR	0	0	0	0	0	RQAGVQYSR	Cfp-10	0.28414	0.421	0.244067	1.182	3565.39	SB
75	BoLA-T5	NIRQAGVQY	NIRQAGVQY	0	0	0	0	0	NIRQAGVQY	Cfp-10	0.188703	0.798	0.200538	2.27	5710.16	WB
51	BoLA-T5	AQAAVVRFQ	AQAAVVRFQ	0	0	0	0	0	AQAAVVRFQ	Cfp-10	0.124552	1.31	0.206332	2.087	5363.18	WB
64	BoLA-T5	KQKQELDEI	KQKQELDEI	0	0	0	0	0	KQKQELDEI	Cfp-10	0.094191	1.759	0.146686	5.197	10225.8	WB
81	BoLA-T5	VQYSRADEE	VQYSRADEE	0	0	0	0	0	VQYSRADEE	Cfp-10	0.093618	1.769	0.236983	1.307	3849.41	WB
12	BoLA-T5	AQEAGNFER	AQEAGNFER	0	0	0	0	0	AQEAGNFER	Cfp-10	0.084745	1.947	0.143817	5.447	10548.2	WB
75	BoLA-1:00901	NIRQAGVQY	NIRQAGVQY	0	0	0	0	0	NIRQAGVQY	Cfp-10	0.426199	0.458	0.279307	1.239	2435.09	SB
90	BoLA-1:00901	QQQALSSQM	QQQALSSQM	0	0	0	0	0	QQQALSSQM	Cfp-10	0.361275	0.599	0.295115	1.052	2052.27	WB
77	BoLA-1:00901	RQAGVQYSR	RQAGVQYSR	0	0	0	0	0	RQAGVQYSR	Cfp-10	0.262084	0.934	0.217483	2.471	4753.61	WB
51	BoLA-1:00901	AQAAVVRFQ	AQAAVVRFQ	0	0	0	0	0	AQAAVVRFQ	Cfp-10	0.214743	1.158	0.249559	1.721	3359.69	WB
27	BoLA-1:00901	TQIDQVEST	TQIDQVEST	0	0	0	0	0	TQIDQVEST	Cfp-10	0.130585	1.824	0.154618	5.421	9384.79	WB
12	BoLA-1:00901	AQEAGNFER	AQEAGNFER	0	0	0	0	0	AQEAGNFER	Cfp-10	0.120184	1.96	0.168036	4.498	8116.6	WB
90	BoLA-1:00902	QQQALSSQM	QQQALSSQM	0	0	0	0	0	QQQALSSQM	Cfp-10	0.300754	0.378	0.292646	0.602	2107.83	SB
77	BoLA-1:00902	RQAGVQYSR	RQAGVQYSR	0	0	0	0	0	RQAGVQYSR	Cfp-10	0.28414	0.421	0.244067	1.182	3565.39	SB
75	BoLA-1:00902	NIRQAGVQY	NIRQAGVQY	0	0	0	0	0	NIRQAGVQY	Cfp-10	0.188703	0.798	0.200538	2.27	5710.16	WB
51	BoLA-1:00902	AQAAVVRFQ	AQAAVVRFQ	0	0	0	0	0	AQAAVVRFQ	Cfp-10	0.124552	1.31	0.206332	2.087	5363.18	WB
64	BoLA-1:00902	KQKQELDEI	KQKQELDEI	0	0	0	0	0	KQKQELDEI	Cfp-10	0.094191	1.759	0.146686	5.197	10225.8	WB
81	BoLA-1:00902	VQYSRADEE	VQYSRADEE	0	0	0	0	0	VQYSRADEE	Cfp-10	0.093618	1.769	0.236983	1.307	3849.41	WB
12	BoLA-1:00902	AQEAGNFER	AQEAGNFER	0	0	0	0	0	AQEAGNFER	Cfp-10	0.084745	1.947	0.143817	5.447	10548.2	WB
88	BoLA-1:01901	EEQQQALSS	EEQQQALSS	0	0	0	0	0	EEQQQALSS	Cfp-10	0.623708	0.167	0.437145	0.326	441.41	SB
13	BoLA-1:01901	QEAGNFERI	QEAGNFERI	0	0	0	0	0	QEAGNFERI	Cfp-10	0.418189	0.402	0.337706	0.973	1294.49	SB
2	BoLA-1:01901	AEMKTDAAT	AEMKTDAAT	0	0	0	0	0	AEMKTDAAT	Cfp-10	0.278554	0.704	0.459831	0.247	345.33	WB
87	BoLA-1:01901	DEEQQQALS	DEEQQQALS	0	0	0	0	0	DEEQQQALS	Cfp-10	0.217985	0.912	0.254958	2.137	3169.06	WB
86	BoLA-1:01901	ADEEQQQAL	ADEEQQQAL	0	0	0	0	0	ADEEQQQAL	Cfp-10	0.091374	1.774	0.084524	13.901	20035.2	WB
70	BoLA-1:02001	DEISTNIRQ	DEISTNIRQ	0	0	0	0	0	DEISTNIRQ	Cfp-10	0.318696	0.245	0.244555	1.178	3546.61	SB
88	BoLA-1:02001	EEQQQALSS	EEQQQALSS	0	0	0	0	0	EEQQQALSS	Cfp-10	0.287248	0.314	0.281072	0.667	2389.03	SB
59	BoLA-1:02001	QEAANKQKQ	QEAANKQKQ	0	0	0	0	0	QEAANKQKQ	Cfp-10	0.261584	0.387	0.166247	3.568	8275.23	SB
13	BoLA-1:02001	QEAGNFERI	QEAGNFERI	0	0	0	0	0	QEAGNFERI	Cfp-10	0.235426	0.487	0.2759	0.72	2526.53	SB
2	BoLA-1:02001	AEMKTDAAT	AEMKTDAAT	0	0	0	0	0	AEMKTDAAT	Cfp-10	0.157141	0.932	0.304024	0.462	1863.68	WB
18	BoLA-1:02001	FERISGDLK	FERISGDLK	0	0	0	0	0	FERISGDLK	Cfp-10	0.151411	0.983	0.29066	0.575	2153.61	WB
67	BoLA-1:02001	QELDEISTN	QELDEISTN	0	0	0	0	0	QELDEISTN	Cfp-10	0.149669	0.998	0.221114	1.621	4570.48	WB
32	BoLA-1:02001	VESTAGSLQ	VESTAGSLQ	0	0	0	0	0	VESTAGSLQ	Cfp-10	0.108695	1.486	0.215129	1.762	4876.24	WB
87	BoLA-1:02001	DEEQQQALS	DEEQQQALS	0	0	0	0	0	DEEQQQALS	Cfp-10	0.104069	1.561	0.18119	2.897	7039.85	WB
86	BoLA-1:02001	ADEEQQQAL	ADEEQQQAL	0	0	0	0	0	ADEEQQQAL	Cfp-10	0.084349	1.922	0.084849	13.047	19964.9	WB
13	BoLA-1:02101	QEAGNFERI	QEAGNFERI	0	0	0	0	0	QEAGNFERI	Cfp-10	0.066555	0.163	0.114826	0.463	14434.6	SB
64	BoLA-1:02101	KQKQELDEI	KQKQELDEI	0	0	0	0	0	KQKQELDEI	Cfp-10	0.031116	0.431	0.074919	1.664	22229.4	SB
90	BoLA-1:02101	QQQALSSQM	QQQALSSQM	0	0	0	0	0	QQQALSSQM	Cfp-10	0.021494	0.651	0.094104	0.836	18062.5	WB
27	BoLA-1:02101	TQIDQVEST	TQIDQVEST	0	0	0	0	0	TQIDQVEST	Cfp-10	0.020696	0.679	0.054189	3.775	27818.7	WB
2	BoLA-1:02101	AEMKTDAAT	AEMKTDAAT	0	0	0	0	0	AEMKTDAAT	Cfp-10	0.014318	0.972	0.129632	0.315	12298	WB
86	BoLA-1:02101	ADEEQQQAL	ADEEQQQAL	0	0	0	0	0	ADEEQQQAL	Cfp-10	0.010576	1.289	0.027218	16.51	37245.5	WB
90	BoLA-1:02301	QQQALSSQM	QQQALSSQM	0	0	0	0	0	QQQALSSQM	Cfp-10	0.626551	0.213	0.414087	0.251	566.48	SB
64	BoLA-1:02301	KQKQELDEI	KQKQELDEI	0	0	0	0	0	KQKQELDEI	Cfp-10	0.351965	0.798	0.230916	2.349	4110.57	WB
77	BoLA-1:02301	RQAGVQYSR	RQAGVQYSR	0	0	0	0	0	RQAGVQYSR	Cfp-10	0.248304	1.299	0.219568	2.693	4647.58	WB
75	BoLA-1:02301	NIRQAGVQY	NIRQAGVQY	0	0	0	0	0	NIRQAGVQY	Cfp-10	0.243658	1.329	0.217596	2.762	4747.81	WB
61	BoLA-1:02301	AANKQKQEL	AANKQKQEL	0	0	0	0	0	AANKQKQEL	Cfp-10	0.233766	1.393	0.153746	6.461	9473.75	WB
64	BoLA-1:02801	KQKQELDEI	KQKQELDEI	0	0	0	0	0	KQKQELDEI	Cfp-10	0.414242	0.029	0.330301	0.139	1402.48	SB
90	BoLA-1:02801	QQQALSSQM	QQQALSSQM	0	0	0	0	0	QQQALSSQM	Cfp-10	0.258675	0.145	0.287211	0.286	2235.5	SB
13	BoLA-1:02801	QEAGNFERI	QEAGNFERI	0	0	0	0	0	QEAGNFERI	Cfp-10	0.103552	0.644	0.214127	0.934	4929.4	WB
61	BoLA-1:02801	AANKQKQEL	AANKQKQEL	0	0	0	0	0	AANKQKQEL	Cfp-10	0.075922	0.969	0.089226	10.205	19041.4	WB
86	BoLA-1:02801	ADEEQQQAL	ADEEQQQAL	0	0	0	0	0	ADEEQQQAL	Cfp-10	0.052513	1.473	0.075059	13.908	22195.8	WB
27	BoLA-1:02801	TQIDQVEST	TQIDQVEST	0	0	0	0	0	TQIDQVEST	Cfp-10	0.044929	1.738	0.109145	6.67	15349.7	WB
13	BoLA-1:02901	QEAGNFERI	QEAGNFERI	0	0	0	0	0	QEAGNFERI	Cfp-10	0.423351	0.069	0.316417	0.069	1629.81	SB
64	BoLA-1:02901	KQKQELDEI	KQKQELDEI	0	0	0	0	0	KQKQELDEI	Cfp-10	0.21777	0.382	0.182904	1.119	6910.5	SB
86	BoLA-1:02901	ADEEQQQAL	ADEEQQQAL	0	0	0	0	0	ADEEQQQAL	Cfp-10	0.179408	0.575	0.096744	6.579	17553.9	WB
90	BoLA-1:02901	QQQALSSQM	QQQALSSQM	0	0	0	0	0	QQQALSSQM	Cfp-10	0.176564	0.59	0.184021	1.095	6827.49	WB
61	BoLA-1:02901	AANKQKQEL	AANKQKQEL	0	0	0	0	0	AANKQKQEL	Cfp-10	0.116244	1.095	0.073505	12.175	22572.1	WB
90	BoLA-1:03101	QQQALSSQM	QQQALSSQM	0	0	0	0	0	QQQALSSQM	Cfp-10	0.327378	0.273	0.242098	0.634	3642.16	SB
77	BoLA-1:03101	RQAGVQYSR	RQAGVQYSR	0	0	0	0	0	RQAGVQYSR	Cfp-10	0.296757	0.352	0.226055	0.863	4332.56	SB
64	BoLA-1:03101	KQKQELDEI	KQKQELDEI	0	0	0	0	0	KQKQELDEI	Cfp-10	0.223284	0.647	0.203463	1.407	5532.27	WB
50	BoLA-1:03101	AAQAAVVRF	AAQAAVVRF	0	0	0	0	0	AAQAAVVRF	Cfp-10	0.140652	1.414	0.130441	6.474	12190.8	WB
[truncated: 457 more rows]

## Sheet: MHC1 Epitope Count 
Pos	Peptide	Appearance Count	Identify		Pos	Peptide	Appearance Count	Identify		Pos	Peptide	Appearance Count	Identify
125	HVDPVVRSL	96	OmpA		20	GNVTSIHSL	54	Esat-6		61	AANKQKQEL	78	Cfp-10
48	GAFERPQSV	88	OmpA		28	LLDEGKQSL	42	Esat-6		90	QQQALSSQM	64	Cfp-10
85	SRSGNTVTL	62	OmpA		61	TATELNNAL	42	Esat-6		64	KQKQELDEI	54	Cfp-10
217	AVTGGPIAF	51	OmpA		31	EGKQSLTKL	34	Esat-6		50	AAQAAVVRF	47	Cfp-10
74	ASALSLSLL	49	OmpA		21	NVTSIHSLL	28	Esat-6		21	ISGDLKTQI	34	Cfp-10
102	AKAALMTAL	44	OmpA		46	SGSEAYQGV	25	Esat-6		35	TAGSLQGQW	26	Cfp-10
277	RAKIVADYL	44	OmpA		17	AIQGNVTSI	25	Esat-6		92	QALSSQMGF	24	Cfp-10
136	SSAEPVFTA	41	OmpA		50	AYQGVQQKW	23	Esat-6		75	NIRQAGVQY	24	Cfp-10
315	RAKNRRVEI	39	OmpA		75	TISEAGQAM	19	Esat-6		13	QEAGNFERI	23	Cfp-10
73	GASALSLSL	38	OmpA		35	SLTKLAAAW	17	Esat-6		77	RQAGVQYSR	19	Cfp-10
290	VAGDHIATV	35	OmpA		57	KWDATATEL	14	Esat-6		86	ADEEQQQAL	19	Cfp-10
175	VKRAATSTW	32	OmpA		68	ALQNLARTI	13	Esat-6		68	ELDEISTNI	17	Cfp-10
33	IGAVVIPLL	32	OmpA		18	IQGNVTSIH	12	Esat-6		3	EMKTDAATL	16	Cfp-10
138	AEPVFTASV	28	OmpA		49	EAYQGVQQK	12	Esat-6		53	AAVVRFQEA	10	Cfp-10
231	SLIPADYEI	28	OmpA		33	KQSLTKLAA	11	Esat-6		7	DAATLAQEA	9	Cfp-10
69	TSTRGASAL	28	OmpA		85	STEGNVTGM	11	Esat-6		85	RADEEQQQA	8	Cfp-10
55	SVTGPTGVL	27	OmpA		86	TEGNVTGMF	8	Esat-6		27	TQIDQVEST	8	Cfp-10
25	GSPGRPWLI	27	OmpA		64	ELNNALQNL	7	Esat-6		73	STNIRQAGV	8	Cfp-10
235	ADYEILNRV	26	OmpA		77	SEAGQAMAS	6	Esat-6		2	AEMKTDAAT	6	Cfp-10
154	KVERDTVTL	26	OmpA		3	EQQWNFAGI	6	Esat-6		24	DLKTQIDQV	6	Cfp-10
24	RGSPGRPWL	25	OmpA		14	AASAIQGNV	5	Esat-6		51	AQAAVVRFQ	5	Cfp-10
145	SVPIPDFGL	25	OmpA		9	AGIEAAASA	4	Esat-6		47	AGTAAQAAV	5	Cfp-10
143	TASVPIPDF	22	OmpA		34	QSLTKLAAA	3	Esat-6		49	TAAQAAVVR	5	Cfp-10
86	RSGNTVTLI	22	OmpA		87	EGNVTGMFA	3	Esat-6		31	QVESTAGSL	5	Cfp-10
196	GQAPPGPPA	22	OmpA		43	WGGSGSEAY	2	Esat-6		88	EEQQQALSS	4	Cfp-10
276	QRAKIVADY	21	OmpA		54	VQQKWDATA	2	Esat-6		12	AQEAGNFER	4	Cfp-10
58	GPTGVLPTL	21	OmpA		30	DEGKQSLTK	2	Esat-6		46	AAGTAAQAA	3	Cfp-10
269	INIPLSAQR	20	OmpA		48	SEAYQGVQQ	2	Esat-6		10	TLAQEAGNF	3	Cfp-10
105	ALMTALNGL	20	OmpA		65	LNNALQNLA	1	Esat-6		56	VRFQEAANK	2	Cfp-10
229	GASLIPADY	19	OmpA		6	WNFAGIEAA	1	Esat-6		67	QELDEISTN	2	Cfp-10
181	STWPDMKIV	18	OmpA		52	QGVQQKWDA	1	Esat-6		18	FERISGDLK	2	Cfp-10
99	DEAAKAALM	17	OmpA		74	RTISEAGQA	1	Esat-6		59	QEAANKQKQ	2	Cfp-10
23	YRGSPGRPW	16	OmpA		82	AMASTEGNV	1	Esat-6		87	DEEQQQALS	2	Cfp-10
239	ILNRVADKL	16	OmpA		55	QQKWDATAT	1	Esat-6		81	VQYSRADEE	2	Cfp-10
113	LLAPGVNVI	15	OmpA		71	NLARTISEA	1	Esat-6		71	EISTNIRQA	1	Cfp-10
249	ACPDARVTI	15	OmpA		2	TEQQWNFAG	1	Esat-6		5	KTDAATLAQ	1	Cfp-10
37	VIPLLIAAI	13	OmpA							48	GTAAQAAVV	1	Cfp-10
164	GTAPSSEHK	12	OmpA							54	AVVRFQEAA	1	Cfp-10
14	TDARRTQKF	11	OmpA							28	QIDQVESTA	1	Cfp-10
225	FGNDGASLI	11	OmpA							45	GAAGTAAQA	1	Cfp-10
54	QSVTGPTGV	11	OmpA							32	VESTAGSLQ	1	Cfp-10
83	SISRSGNTV	11	OmpA							70	DEISTNIRQ	1	Cfp-10
280	IVADYLVAR	10	OmpA
13	TTDARRTQK	10	OmpA
179	ATSTWPDMK	10	OmpA
298	VGLGSVNPI	9	OmpA
71	TRGASALSL	9	OmpA
186	MKIVNNIEV	9	OmpA
252	DARVTINGY	8	OmpA
316	AKNRRVEIV	8	OmpA
232	LIPADYEIL	8	OmpA
15	DARRTQKFY	7	OmpA
180	TSTWPDMKI	7	OmpA
155	VERDTVTLT	7	OmpA
97	FPDEAAKAA	6	OmpA
169	SEHKDAVKR	6	OmpA
50	FERPQSVTG	6	OmpA
307	ASNATPEGR	6	OmpA
76	ALSLSLLSI	6	OmpA
265	GSEGINIPL	5	OmpA
278	AKIVADYLV	5	OmpA
163	TGTAPSSEH	5	OmpA
42	IAAIGYGAF	4	OmpA
127	DPVVRSLDF	4	OmpA
29	RPWLIGAVV	4	OmpA
112	GLLAPGVNV	4	OmpA
122	DQIHVDPVV	4	OmpA
266	SEGINIPLS	4	OmpA
273	LSAQRAKIV	3	OmpA
34	GAVVIPLLI	3	OmpA
198	APPGPPASG	3	OmpA
36	VVIPLLIAA	3	OmpA
16	ARRTQKFYR	3	OmpA
282	ADYLVARGV	3	OmpA
209	ADLQSAINA	3	OmpA
192	IEVTGQAPP	3	OmpA
117	GVNVIDQIH	3	OmpA
57	TGPTGVLPT	3	OmpA
292	GDHIATVGL	2	OmpA
317	KNRRVEIVV	2	OmpA
263	NTGSEGINI	2	OmpA
56	VTGPTGVLP	2	OmpA
309	NATPEGRAK	2	OmpA
64	PTLTPTSTR	2	OmpA
63	LPTLTPTST	2	OmpA
302	SVNPIASNA	2	OmpA
101	AAKAALMTA	2	OmpA
8	GQTPATTDA	2	OmpA
168	SSEHKDAVK	2	OmpA
131	RSLDFSSAE	2	OmpA
313	EGRAKNRRV	1	OmpA
118	VNVIDQIHV	1	OmpA
190	NNIEVTGQA	1	OmpA
267	EGINIPLSA	1	OmpA
178	AATSTWPDM	1	OmpA
152	GLKVERDTV	1	OmpA
242	RVADKLKAC	1	OmpA
274	SAQRAKIVA	1	OmpA
21	KFYRGSPGR	1	OmpA
286	VARGVAGDH	1	OmpA
106	LMTALNGLL	1	OmpA
32	LIGAVVIPL	1	OmpA
210	DLQSAINAV	1	OmpA

## Sheet: MHC2 Epitope Candidate
Pos	MHC	Peptide	Of	Core	Core_Rel	Inverted	Identifier	Score_EL	%Rank_EL	EXP_Bind	Score_BA	%Rank_BA	BindLevel
277	BoLA-DRB3_00101	RAKIVADYLVARGVA	3	IVADYLVAR	1	0	OmpA	0.567947	1.53	NA	0.382498	9.56	WB
276	BoLA-DRB3_00101	QRAKIVADYLVARGV	4	IVADYLVAR	1	0	OmpA	0.492721	2.06	NA	0.371542	10.78	WB
13	BoLA-DRB3_00101	TTDARRTQKFYRGSP	3	ARRTQKFYR	1	0	OmpA	0.465065	2.33	NA	0.430936	5.5	WB
275	BoLA-DRB3_00101	AQRAKIVADYLVARG	5	IVADYLVAR	0.98	0	OmpA	0.411123	2.88	NA	0.354265	12.85	WB
266	BoLA-DRB3_00101	SEGINIPLSAQRAKI	3	INIPLSAQR	0.81	0	OmpA	0.404383	2.96	NA	0.465777	3.63	WB
265	BoLA-DRB3_00101	GSEGINIPLSAQRAK	4	INIPLSAQR	0.92	0	OmpA	0.363805	3.45	NA	0.406172	7.35	WB
12	BoLA-DRB3_00101	ATTDARRTQKFYRGS	4	ARRTQKFYR	1	0	OmpA	0.345845	3.71	NA	0.436171	5.18	WB
121	BoLA-DRB3_00101	IDQIHVDPVVRSLDF	3	IHVDPVVRS	0.91	0	OmpA	0.330531	3.94	NA	0.359139	12.24	WB
120	BoLA-DRB3_00101	VIDQIHVDPVVRSLD	4	IHVDPVVRS	0.93	0	OmpA	0.328678	3.97	NA	0.352861	13.02	WB
278	BoLA-DRB3_00101	AKIVADYLVARGVAG	2	IVADYLVAR	0.97	0	OmpA	0.313088	4.25	NA	0.365911	11.44	WB
267	BoLA-DRB3_00101	EGINIPLSAQRAKIV	2	INIPLSAQR	0.47	0	OmpA	0.281169	4.91	NA	0.489331	2.61	WB
277	BoLA-DRB3_00103	RAKIVADYLVARGVA	3	IVADYLVAR	1	0	OmpA	0.721729	0.32	NA	0.440376	1.13	SB
276	BoLA-DRB3_00103	QRAKIVADYLVARGV	4	IVADYLVAR	0.99	0	OmpA	0.65938	0.48	NA	0.431222	1.37	SB
275	BoLA-DRB3_00103	AQRAKIVADYLVARG	5	IVADYLVAR	0.99	0	OmpA	0.570564	0.87	NA	0.412823	1.97	SB
278	BoLA-DRB3_00103	AKIVADYLVARGVAG	2	IVADYLVAR	0.97	0	OmpA	0.47879	1.45	NA	0.411276	2.03	WB
121	BoLA-DRB3_00103	IDQIHVDPVVRSLDF	3	IHVDPVVRS	0.94	0	OmpA	0.456333	1.61	NA	0.420224	1.7	WB
120	BoLA-DRB3_00103	VIDQIHVDPVVRSLD	4	IHVDPVVRS	0.99	0	OmpA	0.446563	1.69	NA	0.411217	2.03	WB
13	BoLA-DRB3_00103	TTDARRTQKFYRGSP	3	ARRTQKFYR	1	0	OmpA	0.391873	2.27	NA	0.259962	22.02	WB
266	BoLA-DRB3_00103	SEGINIPLSAQRAKI	3	INIPLSAQR	0.8	0	OmpA	0.37258	2.52	NA	0.391259	2.99	WB
265	BoLA-DRB3_00103	GSEGINIPLSAQRAK	4	INIPLSAQR	0.92	0	OmpA	0.339515	3	NA	0.350678	6.08	WB
119	BoLA-DRB3_00103	NVIDQIHVDPVVRSL	5	IHVDPVVRS	0.83	0	OmpA	0.311432	3.47	NA	0.411808	2	WB
122	BoLA-DRB3_00103	DQIHVDPVVRSLDFS	2	IHVDPVVRS	0.85	0	OmpA	0.309621	3.5	NA	0.37593	3.94	WB
12	BoLA-DRB3_00103	ATTDARRTQKFYRGS	4	ARRTQKFYR	1	0	OmpA	0.289242	3.94	NA	0.264399	20.83	WB
267	BoLA-DRB3_00103	EGINIPLSAQRAKIV	2	INIPLSAQR	0.49	0	OmpA	0.267702	4.42	NA	0.416032	1.85	WB
303	BoLA-DRB3_00103	VNPIASNATPEGRAK	3	IASNATPEG	0.87	0	OmpA	0.261669	4.58	NA	0.197454	42.6	WB
118	BoLA-DRB3_00103	VNVIDQIHVDPVVRS	3	IDQIHVDPV	0.56	0	OmpA	0.248081	4.98	NA	0.382266	3.53	WB
118	BoLA-DRB3_00201	VNVIDQIHVDPVVRS	3	IDQIHVDPV	0.96	0	OmpA	0.477801	0.93	NA	0.449949	2.19	SB
115	BoLA-DRB3_00201	APGVNVIDQIHVDPV	3	VNVIDQIHV	0.96	0	OmpA	0.423608	1.34	NA	0.332193	16.23	WB
117	BoLA-DRB3_00201	GVNVIDQIHVDPVVR	4	IDQIHVDPV	0.95	0	OmpA	0.412914	1.45	NA	0.397999	6.11	WB
114	BoLA-DRB3_00201	LAPGVNVIDQIHVDP	4	VNVIDQIHV	1	0	OmpA	0.401258	1.56	NA	0.286551	27.06	WB
183	BoLA-DRB3_00201	WPDMKIVNNIEVTGQ	3	MKIVNNIEV	0.87	0	OmpA	0.348982	2.26	NA	0.321858	18.36	WB
119	BoLA-DRB3_00201	NVIDQIHVDPVVRSL	2	IDQIHVDPV	0.69	0	OmpA	0.345987	2.3	NA	0.445832	2.39	WB
116	BoLA-DRB3_00201	PGVNVIDQIHVDPVV	2	VNVIDQIHV	0.46	0	OmpA	0.336618	2.44	NA	0.365955	10.26	WB
184	BoLA-DRB3_00201	PDMKIVNNIEVTGQA	2	MKIVNNIEV	0.64	0	OmpA	0.314086	2.85	NA	0.319162	18.95	WB
277	BoLA-DRB3_00201	RAKIVADYLVARGVA	3	IVADYLVAR	0.66	0	OmpA	0.300143	3.14	NA	0.477569	1.14	WB
120	BoLA-DRB3_00201	VIDQIHVDPVVRSLD	4	IHVDPVVRS	0.86	0	OmpA	0.287618	3.41	NA	0.424854	3.67	WB
254	BoLA-DRB3_00201	RVTINGYTDNTGSEG	3	INGYTDNTG	1	0	OmpA	0.282516	3.52	NA	0.168377	65.3	WB
182	BoLA-DRB3_00201	TWPDMKIVNNIEVTG	4	MKIVNNIEV	0.91	0	OmpA	0.27238	3.75	NA	0.30935	21.19	WB
121	BoLA-DRB3_00201	IDQIHVDPVVRSLDF	3	IHVDPVVRS	0.96	0	OmpA	0.258134	4.08	NA	0.409889	4.94	WB
113	BoLA-DRB3_00201	LLAPGVNVIDQIHVD	5	VNVIDQIHV	0.99	0	OmpA	0.251239	4.27	NA	0.302517	22.89	WB
235	BoLA-DRB3_00201	ADYEILNRVADKLKA	4	ILNRVADKL	0.81	0	OmpA	0.246185	4.41	NA	0.316024	19.64	WB
278	BoLA-DRB3_00201	AKIVADYLVARGVAG	3	VADYLVARG	0.74	0	OmpA	0.240976	4.56	NA	0.453157	2.03	WB
185	BoLA-DRB3_00201	DMKIVNNIEVTGQAP	3	IVNNIEVTG	0.61	0	OmpA	0.239565	4.61	NA	0.301829	23.06	WB
253	BoLA-DRB3_00201	ARVTINGYTDNTGSE	4	INGYTDNTG	0.93	0	OmpA	0.227803	5	NA	0.189666	57.94	WB
118	BoLA-DRB3_00202	VNVIDQIHVDPVVRS	3	IDQIHVDPV	0.96	0	OmpA	0.477801	0.93	NA	0.449949	2.19	SB
115	BoLA-DRB3_00202	APGVNVIDQIHVDPV	3	VNVIDQIHV	0.96	0	OmpA	0.423608	1.34	NA	0.332193	16.23	WB
117	BoLA-DRB3_00202	GVNVIDQIHVDPVVR	4	IDQIHVDPV	0.95	0	OmpA	0.412914	1.45	NA	0.397999	6.11	WB
114	BoLA-DRB3_00202	LAPGVNVIDQIHVDP	4	VNVIDQIHV	1	0	OmpA	0.401258	1.56	NA	0.286551	27.06	WB
183	BoLA-DRB3_00202	WPDMKIVNNIEVTGQ	3	MKIVNNIEV	0.87	0	OmpA	0.348982	2.26	NA	0.321858	18.36	WB
119	BoLA-DRB3_00202	NVIDQIHVDPVVRSL	2	IDQIHVDPV	0.69	0	OmpA	0.345987	2.3	NA	0.445832	2.39	WB
116	BoLA-DRB3_00202	PGVNVIDQIHVDPVV	2	VNVIDQIHV	0.46	0	OmpA	0.336618	2.44	NA	0.365955	10.26	WB
184	BoLA-DRB3_00202	PDMKIVNNIEVTGQA	2	MKIVNNIEV	0.64	0	OmpA	0.314086	2.85	NA	0.319162	18.95	WB
277	BoLA-DRB3_00202	RAKIVADYLVARGVA	3	IVADYLVAR	0.66	0	OmpA	0.300143	3.14	NA	0.477569	1.14	WB
120	BoLA-DRB3_00202	VIDQIHVDPVVRSLD	4	IHVDPVVRS	0.86	0	OmpA	0.287618	3.41	NA	0.424854	3.67	WB
254	BoLA-DRB3_00202	RVTINGYTDNTGSEG	3	INGYTDNTG	1	0	OmpA	0.282516	3.52	NA	0.168377	65.3	WB
182	BoLA-DRB3_00202	TWPDMKIVNNIEVTG	4	MKIVNNIEV	0.91	0	OmpA	0.27238	3.75	NA	0.30935	21.19	WB
121	BoLA-DRB3_00202	IDQIHVDPVVRSLDF	3	IHVDPVVRS	0.96	0	OmpA	0.258134	4.08	NA	0.409889	4.94	WB
113	BoLA-DRB3_00202	LLAPGVNVIDQIHVD	5	VNVIDQIHV	0.99	0	OmpA	0.251239	4.27	NA	0.302517	22.89	WB
235	BoLA-DRB3_00202	ADYEILNRVADKLKA	4	ILNRVADKL	0.81	0	OmpA	0.246185	4.41	NA	0.316024	19.64	WB
278	BoLA-DRB3_00202	AKIVADYLVARGVAG	3	VADYLVARG	0.74	0	OmpA	0.240976	4.56	NA	0.453157	2.03	WB
185	BoLA-DRB3_00202	DMKIVNNIEVTGQAP	3	IVNNIEVTG	0.61	0	OmpA	0.239565	4.61	NA	0.301829	23.06	WB
253	BoLA-DRB3_00202	ARVTINGYTDNTGSE	4	INGYTDNTG	0.93	0	OmpA	0.227803	5	NA	0.189666	57.94	WB
280	BoLA-DRB3_00301	IVADYLVARGVAGDH	4	YLVARGVAG	1	0	OmpA	0.510966	0.46	NA	0.445978	3.12	SB
281	BoLA-DRB3_00301	VADYLVARGVAGDHI	3	YLVARGVAG	0.99	0	OmpA	0.509028	0.46	NA	0.433215	3.77	SB
121	BoLA-DRB3_00301	IDQIHVDPVVRSLDF	3	IHVDPVVRS	1	0	OmpA	0.4216	0.88	NA	0.453755	2.77	SB
120	BoLA-DRB3_00301	VIDQIHVDPVVRSLD	4	IHVDPVVRS	1	0	OmpA	0.41028	0.96	NA	0.440231	3.4	SB
183	BoLA-DRB3_00301	WPDMKIVNNIEVTGQ	3	MKIVNNIEV	0.74	0	OmpA	0.388936	1.12	NA	0.326551	15.37	WB
279	BoLA-DRB3_00301	KIVADYLVARGVAGD	5	YLVARGVAG	0.91	0	OmpA	0.377729	1.21	NA	0.464073	2.35	WB
184	BoLA-DRB3_00301	PDMKIVNNIEVTGQA	2	MKIVNNIEV	0.55	0	OmpA	0.36104	1.37	NA	0.329473	14.86	WB
282	BoLA-DRB3_00301	ADYLVARGVAGDHIA	2	YLVARGVAG	0.98	0	OmpA	0.320211	1.86	NA	0.412744	5.07	WB
303	BoLA-DRB3_00301	VNPIASNATPEGRAK	3	IASNATPEG	1	0	OmpA	0.295685	2.21	NA	0.262672	29.77	WB
185	BoLA-DRB3_00301	DMKIVNNIEVTGQAP	3	IVNNIEVTG	0.89	0	OmpA	0.294597	2.23	NA	0.313577	17.77	WB
277	BoLA-DRB3_00301	RAKIVADYLVARGVA	3	IVADYLVAR	1	0	OmpA	0.291398	2.28	NA	0.440117	3.4	WB
182	BoLA-DRB3_00301	TWPDMKIVNNIEVTG	4	MKIVNNIEV	0.92	0	OmpA	0.272106	2.6	NA	0.306317	19.26	WB
119	BoLA-DRB3_00301	NVIDQIHVDPVVRSL	5	IHVDPVVRS	0.89	0	OmpA	0.270128	2.64	NA	0.449499	2.96	WB
222	BoLA-DRB3_00301	PIAFGNDGASLIPAD	3	FGNDGASLI	1	0	OmpA	0.265359	2.73	NA	0.380004	7.93	WB
138	BoLA-DRB3_00301	AEPVFTASVPIPDFG	4	FTASVPIPD	0.86	0	OmpA	0.258707	2.86	NA	0.370328	9.02	WB
122	BoLA-DRB3_00301	DQIHVDPVVRSLDFS	2	IHVDPVVRS	1	0	OmpA	0.252162	2.99	NA	0.401661	5.92	WB
276	BoLA-DRB3_00301	QRAKIVADYLVARGV	4	IVADYLVAR	0.95	0	OmpA	0.241207	3.28	NA	0.431081	3.89	WB
234	BoLA-DRB3_00301	PADYEILNRVADKLK	3	YEILNRVAD	0.91	0	OmpA	0.231968	3.53	NA	0.262938	29.7	WB
139	BoLA-DRB3_00301	EPVFTASVPIPDFGL	3	FTASVPIPD	0.99	0	OmpA	0.231283	3.55	NA	0.390332	6.93	WB
137	BoLA-DRB3_00301	SAEPVFTASVPIPDF	5	FTASVPIPD	0.66	0	OmpA	0.204846	4.38	NA	0.371531	8.88	WB
130	BoLA-DRB3_00301	VRSLDFSSAEPVFTA	3	LDFSSAEPV	0.79	0	OmpA	0.202387	4.46	NA	0.47932	1.84	WB
302	BoLA-DRB3_00301	SVNPIASNATPEGRA	4	IASNATPEG	0.99	0	OmpA	0.196616	4.66	NA	0.243315	35.26	WB
221	BoLA-DRB3_00301	GPIAFGNDGASLIPA	4	FGNDGASLI	0.93	0	OmpA	0.195303	4.71	NA	0.390641	6.9	WB
275	BoLA-DRB3_00301	AQRAKIVADYLVARG	5	IVADYLVAR	0.85	0	OmpA	0.193267	4.78	NA	0.405905	5.6	WB
120	BoLA-DRB3_0030201	VIDQIHVDPVVRSLD	4	IHVDPVVRS	0.95	0	OmpA	0.530256	0.18	NA	0.490746	5.68	SB
121	BoLA-DRB3_0030201	IDQIHVDPVVRSLDF	3	IHVDPVVRS	0.97	0	OmpA	0.526879	0.19	NA	0.49002	5.74	SB
303	BoLA-DRB3_0030201	VNPIASNATPEGRAK	3	IASNATPEG	1	0	OmpA	0.466806	0.42	NA	0.32636	32.42	SB
183	BoLA-DRB3_0030201	WPDMKIVNNIEVTGQ	3	MKIVNNIEV	0.69	0	OmpA	0.459066	0.46	NA	0.379853	20.55	SB
277	BoLA-DRB3_0030201	RAKIVADYLVARGVA	3	IVADYLVAR	0.97	0	OmpA	0.455937	0.47	NA	0.512783	4.12	SB
119	BoLA-DRB3_0030201	NVIDQIHVDPVVRSL	5	IHVDPVVRS	0.73	0	OmpA	0.452436	0.49	NA	0.503174	4.75	SB
184	BoLA-DRB3_0030201	PDMKIVNNIEVTGQA	2	MKIVNNIEV	0.52	0	OmpA	0.44877	0.51	NA	0.393054	18.13	SB
115	BoLA-DRB3_0030201	APGVNVIDQIHVDPV	3	VNVIDQIHV	0.95	0	OmpA	0.430611	0.62	NA	0.328967	31.78	SB
114	BoLA-DRB3_0030201	LAPGVNVIDQIHVDP	4	VNVIDQIHV	1	0	OmpA	0.41083	0.74	NA	0.312563	35.96	SB
276	BoLA-DRB3_0030201	QRAKIVADYLVARGV	4	IVADYLVAR	0.95	0	OmpA	0.409766	0.75	NA	0.495728	5.29	SB
118	BoLA-DRB3_0030201	VNVIDQIHVDPVVRS	3	IDQIHVDPV	0.66	0	OmpA	0.409001	0.75	NA	0.483639	6.25	SB
185	BoLA-DRB3_0030201	DMKIVNNIEVTGQAP	3	IVNNIEVTG	0.82	0	OmpA	0.40638	0.77	NA	0.376717	21.19	SB
302	BoLA-DRB3_0030201	SVNPIASNATPEGRA	4	IASNATPEG	0.99	0	OmpA	0.374043	1.08	NA	0.310179	36.59	WB
122	BoLA-DRB3_0030201	DQIHVDPVVRSLDFS	2	IHVDPVVRS	0.95	0	OmpA	0.372702	1.09	NA	0.448434	9.82	WB
275	BoLA-DRB3_0030201	AQRAKIVADYLVARG	5	IVADYLVAR	0.9	0	OmpA	0.360619	1.25	NA	0.471946	7.3	WB
234	BoLA-DRB3_0030201	PADYEILNRVADKLK	3	YEILNRVAD	0.73	0	OmpA	0.357193	1.29	NA	0.400336	16.87	WB
212	BoLA-DRB3_0030201	QSAINAVTGGPIAFG	3	INAVTGGPI	1	0	OmpA	0.351486	1.38	NA	0.415414	14.43	WB
182	BoLA-DRB3_0030201	TWPDMKIVNNIEVTG	4	MKIVNNIEV	0.91	0	OmpA	0.350536	1.4	NA	0.349264	27.04	WB
270	BoLA-DRB3_0030201	NIPLSAQRAKIVADY	3	LSAQRAKIV	0.99	0	OmpA	0.326956	1.8	NA	0.482086	6.38	WB
116	BoLA-DRB3_0030201	PGVNVIDQIHVDPVV	2	VNVIDQIHV	0.63	0	OmpA	0.318796	1.96	NA	0.354659	25.8	WB
269	BoLA-DRB3_0030201	INIPLSAQRAKIVAD	4	LSAQRAKIV	0.94	0	OmpA	0.305832	2.26	NA	0.510678	4.26	WB
304	BoLA-DRB3_0030201	NPIASNATPEGRAKN	2	IASNATPEG	1	0	OmpA	0.301795	2.35	NA	0.296167	40.19	WB
211	BoLA-DRB3_0030201	LQSAINAVTGGPIAF	4	INAVTGGPI	1	0	OmpA	0.297603	2.45	NA	0.449484	9.7	WB
117	BoLA-DRB3_0030201	GVNVIDQIHVDPVVR	4	IDQIHVDPV	0.92	0	OmpA	0.296416	2.47	NA	0.400432	16.86	WB
301	BoLA-DRB3_0030201	GSVNPIASNATPEGR	5	IASNATPEG	0.82	0	OmpA	0.28257	2.86	NA	0.284431	43.36	WB
113	BoLA-DRB3_0030201	LLAPGVNVIDQIHVD	5	VNVIDQIHV	0.97	0	OmpA	0.27807	2.99	NA	0.340438	29.05	WB
278	BoLA-DRB3_0030201	AKIVADYLVARGVAG	2	IVADYLVAR	0.8	0	OmpA	0.274514	3.1	NA	0.50777	4.44	WB
235	BoLA-DRB3_0030201	ADYEILNRVADKLKA	4	ILNRVADKL	0.49	0	OmpA	0.26189	3.5	NA	0.444785	10.27	WB
210	BoLA-DRB3_0030201	DLQSAINAVTGGPIA	5	INAVTGGPI	0.97	0	OmpA	0.259128	3.6	NA	0.438814	11.03	WB
130	BoLA-DRB3_0030201	VRSLDFSSAEPVFTA	3	LDFSSAEPV	0.92	0	OmpA	0.24974	3.92	NA	0.458885	8.64	WB
186	BoLA-DRB3_0030201	MKIVNNIEVTGQAPP	2	IVNNIEVTG	0.75	0	OmpA	0.243585	4.19	NA	0.353632	26.02	WB
233	BoLA-DRB3_0030201	IPADYEILNRVADKL	4	YEILNRVAD	0.83	0	OmpA	0.235751	4.55	NA	0.325496	32.63	WB
280	BoLA-DRB3_0030201	IVADYLVARGVAGDH	4	YLVARGVAG	0.93	0	OmpA	0.225907	5	NA	0.470412	7.45	WB
121	BoLA-DRB3_00303	IDQIHVDPVVRSLDF	3	IHVDPVVRS	0.98	0	OmpA	0.593433	0.07	NA	0.496346	3.7	SB
120	BoLA-DRB3_00303	VIDQIHVDPVVRSLD	4	IHVDPVVRS	0.98	0	OmpA	0.577702	0.09	NA	0.482189	4.55	SB
183	BoLA-DRB3_00303	WPDMKIVNNIEVTGQ	3	MKIVNNIEV	0.8	0	OmpA	0.55153	0.13	NA	0.359242	19.66	SB
184	BoLA-DRB3_00303	PDMKIVNNIEVTGQA	2	MKIVNNIEV	0.53	0	OmpA	0.523136	0.19	NA	0.370562	17.58	SB
277	BoLA-DRB3_00303	RAKIVADYLVARGVA	3	IVADYLVAR	1	0	OmpA	0.521353	0.19	NA	0.528857	2.15	SB
185	BoLA-DRB3_00303	DMKIVNNIEVTGQAP	3	IVNNIEVTG	0.89	0	OmpA	0.458859	0.35	NA	0.358773	19.74	SB
303	BoLA-DRB3_00303	VNPIASNATPEGRAK	3	IASNATPEG	1	0	OmpA	0.456979	0.35	NA	0.27795	38.33	SB
276	BoLA-DRB3_00303	QRAKIVADYLVARGV	4	IVADYLVAR	0.97	0	OmpA	0.456583	0.36	NA	0.517235	2.62	SB
119	BoLA-DRB3_00303	NVIDQIHVDPVVRSL	5	IHVDPVVRS	0.83	0	OmpA	0.432277	0.44	NA	0.492705	3.9	SB
182	BoLA-DRB3_00303	TWPDMKIVNNIEVTG	4	MKIVNNIEV	0.91	0	OmpA	0.415817	0.51	NA	0.326739	26.36	SB
122	BoLA-DRB3_00303	DQIHVDPVVRSLDFS	2	IHVDPVVRS	0.97	0	OmpA	0.398061	0.61	NA	0.456255	6.54	SB
275	BoLA-DRB3_00303	AQRAKIVADYLVARG	5	IVADYLVAR	0.85	0	OmpA	0.390952	0.66	NA	0.494571	3.8	SB
302	BoLA-DRB3_00303	SVNPIASNATPEGRA	4	IASNATPEG	0.99	0	OmpA	0.347184	1	NA	0.255046	44.55	SB
118	BoLA-DRB3_00303	VNVIDQIHVDPVVRS	3	IDQIHVDPV	0.56	0	OmpA	0.321202	1.29	NA	0.446677	7.42	WB
115	BoLA-DRB3_00303	APGVNVIDQIHVDPV	3	VNVIDQIHV	0.93	0	OmpA	0.317906	1.33	NA	0.275717	38.92	WB
278	BoLA-DRB3_00303	AKIVADYLVARGVAG	2	IVADYLVAR	0.96	0	OmpA	0.292278	1.7	NA	0.528626	2.16	WB
114	BoLA-DRB3_00303	LAPGVNVIDQIHVDP	4	VNVIDQIHV	0.97	0	OmpA	0.289431	1.75	NA	0.255093	44.54	WB
304	BoLA-DRB3_00303	NPIASNATPEGRAKN	2	IASNATPEG	0.99	0	OmpA	0.286829	1.79	NA	0.251902	45.44	WB
186	BoLA-DRB3_00303	MKIVNNIEVTGQAPP	2	IVNNIEVTG	0.91	0	OmpA	0.256877	2.35	NA	0.335578	24.42	WB
181	BoLA-DRB3_00303	STWPDMKIVNNIEVT	5	MKIVNNIEV	0.98	0	OmpA	0.244925	2.61	NA	0.309562	30.39	WB
130	BoLA-DRB3_00303	VRSLDFSSAEPVFTA	3	LDFSSAEPV	0.97	0	OmpA	0.239437	2.75	NA	0.445662	7.52	WB
212	BoLA-DRB3_00303	QSAINAVTGGPIAFG	3	INAVTGGPI	1	0	OmpA	0.227556	3.07	NA	0.355049	20.46	WB
301	BoLA-DRB3_00303	GSVNPIASNATPEGR	5	IASNATPEG	0.89	0	OmpA	0.222996	3.2	NA	0.227973	52.41	WB
287	BoLA-DRB3_00303	ARGVAGDHIATVGLG	3	VAGDHIATV	1	0	OmpA	0.222584	3.21	NA	0.218779	55.16	WB
117	BoLA-DRB3_00303	GVNVIDQIHVDPVVR	4	IDQIHVDPV	0.85	0	OmpA	0.21196	3.53	NA	0.350267	21.43	WB
244	BoLA-DRB3_00303	ADKLKACPDARVTIN	3	LKACPDARV	1	0	OmpA	0.211008	3.56	NA	0.379251	16.15	WB
116	BoLA-DRB3_00303	PGVNVIDQIHVDPVV	2	VNVIDQIHV	0.64	0	OmpA	0.202965	3.83	NA	0.300022	32.71	WB
29	BoLA-DRB3_00303	RPWLIGAVVIPLLIA	3	LIGAVVIPL	0.91	0	OmpA	0.198372	3.99	NA	0.491467	3.97	WB
281	BoLA-DRB3_00303	VADYLVARGVAGDHI	3	YLVARGVAG	0.91	0	OmpA	0.197938	4	NA	0.434656	8.6	WB
280	BoLA-DRB3_00303	IVADYLVARGVAGDH	4	YLVARGVAG	0.94	0	OmpA	0.197654	4.02	NA	0.477732	4.86	WB
270	BoLA-DRB3_00303	NIPLSAQRAKIVADY	3	LSAQRAKIV	1	0	OmpA	0.187611	4.42	NA	0.450381	7.07	WB
129	BoLA-DRB3_00303	VVRSLDFSSAEPVFT	4	LDFSSAEPV	0.99	0	OmpA	0.183755	4.59	NA	0.418549	10.48	WB
118	BoLA-DRB3_00401	VNVIDQIHVDPVVRS	3	IDQIHVDPV	0.92	0	OmpA	0.447571	1.34	NA	0.556568	2.64	WB
115	BoLA-DRB3_00401	APGVNVIDQIHVDPV	3	VNVIDQIHV	0.93	0	OmpA	0.433715	1.5	NA	0.468294	10.8	WB
114	BoLA-DRB3_00401	LAPGVNVIDQIHVDP	4	VNVIDQIHV	1	0	OmpA	0.402489	1.89	NA	0.399992	22.51	WB
117	BoLA-DRB3_00401	GVNVIDQIHVDPVVR	4	IDQIHVDPV	0.93	0	OmpA	0.379669	2.24	NA	0.529543	4.31	WB
183	BoLA-DRB3_00401	WPDMKIVNNIEVTGQ	3	MKIVNNIEV	0.88	0	OmpA	0.360345	2.56	NA	0.47455	9.97	WB
277	BoLA-DRB3_00401	RAKIVADYLVARGVA	3	IVADYLVAR	0.78	0	OmpA	0.347315	2.83	NA	0.560308	2.45	WB
116	BoLA-DRB3_00401	PGVNVIDQIHVDPVV	2	VNVIDQIHV	0.59	0	OmpA	0.320023	3.42	NA	0.509769	5.94	WB
184	BoLA-DRB3_00401	PDMKIVNNIEVTGQA	2	MKIVNNIEV	0.65	0	OmpA	0.31884	3.45	NA	0.476025	9.78	WB
119	BoLA-DRB3_00401	NVIDQIHVDPVVRSL	2	IDQIHVDPV	0.72	0	OmpA	0.294124	4.05	NA	0.55044	2.96	WB
182	BoLA-DRB3_00401	TWPDMKIVNNIEVTG	4	MKIVNNIEV	0.96	0	OmpA	0.289177	4.2	NA	0.458332	12.22	WB
235	BoLA-DRB3_00401	ADYEILNRVADKLKA	4	ILNRVADKL	0.89	0	OmpA	0.284979	4.33	NA	0.427817	17.22	WB
276	BoLA-DRB3_00401	QRAKIVADYLVARGV	4	IVADYLVAR	0.77	0	OmpA	0.283251	4.38	NA	0.55289	2.83	WB
29	BoLA-DRB3_00402	RPWLIGAVVIPLLIA	3	LIGAVVIPL	0.89	0	OmpA	0.70578	0.45	NA	0.817736	0.02	SB
183	BoLA-DRB3_00402	WPDMKIVNNIEVTGQ	3	MKIVNNIEV	0.96	0	OmpA	0.662273	0.69	NA	0.549793	11.94	SB
28	BoLA-DRB3_00402	GRPWLIGAVVIPLLI	4	LIGAVVIPL	0.92	0	OmpA	0.630192	0.9	NA	0.806012	0.04	SB
118	BoLA-DRB3_00402	VNVIDQIHVDPVVRS	3	IDQIHVDPV	0.95	0	OmpA	0.60573	1.12	NA	0.620878	4.86	WB
130	BoLA-DRB3_00402	VRSLDFSSAEPVFTA	3	LDFSSAEPV	0.94	0	OmpA	0.603513	1.14	NA	0.706373	1.01	WB
182	BoLA-DRB3_00402	TWPDMKIVNNIEVTG	4	MKIVNNIEV	0.98	0	OmpA	0.585888	1.33	NA	0.533515	14.13	WB
184	BoLA-DRB3_00402	PDMKIVNNIEVTGQA	2	MKIVNNIEV	0.88	0	OmpA	0.578566	1.42	NA	0.542227	12.96	WB
27	BoLA-DRB3_00402	PGRPWLIGAVVIPLL	5	LIGAVVIPL	0.99	0	OmpA	0.570463	1.5	NA	0.793948	0.06	WB
117	BoLA-DRB3_00402	GVNVIDQIHVDPVVR	4	IDQIHVDPV	0.94	0	OmpA	0.542208	1.85	NA	0.569045	9.58	WB
129	BoLA-DRB3_00402	VVRSLDFSSAEPVFT	4	LDFSSAEPV	0.99	0	OmpA	0.499763	2.47	NA	0.692065	1.36	WB
30	BoLA-DRB3_00402	PWLIGAVVIPLLIAA	2	LIGAVVIPL	0.77	0	OmpA	0.483159	2.78	NA	0.776333	0.14	WB
115	BoLA-DRB3_00402	APGVNVIDQIHVDPV	3	VNVIDQIHV	0.8	0	OmpA	0.437679	3.77	NA	0.488454	21.11	WB
119	BoLA-DRB3_00402	NVIDQIHVDPVVRSL	2	IDQIHVDPV	0.65	0	OmpA	0.435742	3.81	NA	0.631515	4.13	WB
116	BoLA-DRB3_00402	PGVNVIDQIHVDPVV	5	IDQIHVDPV	0.63	0	OmpA	0.428834	3.98	NA	0.538323	13.48	WB
270	BoLA-DRB3_00402	NIPLSAQRAKIVADY	3	LSAQRAKIV	0.99	0	OmpA	0.423808	4.12	NA	0.541837	13.01	WB
181	BoLA-DRB3_00402	STWPDMKIVNNIEVT	5	MKIVNNIEV	0.99	0	OmpA	0.420465	4.21	NA	0.516331	16.58	WB
131	BoLA-DRB3_00402	RSLDFSSAEPVFTAS	2	LDFSSAEPV	0.69	0	OmpA	0.418762	4.26	NA	0.66988	2.13	WB
235	BoLA-DRB3_00402	ADYEILNRVADKLKA	4	ILNRVADKL	0.94	0	OmpA	0.413834	4.4	NA	0.492931	20.34	WB
103	BoLA-DRB3_00402	KAALMTALNGLLAPG	3	LMTALNGLL	0.88	0	OmpA	0.413468	4.41	NA	0.616092	5.22	WB
212	BoLA-DRB3_00402	QSAINAVTGGPIAFG	3	INAVTGGPI	1	0	OmpA	0.412065	4.45	NA	0.629042	4.3	WB
120	BoLA-DRB3_00402	VIDQIHVDPVVRSLD	4	IHVDPVVRS	0.85	0	OmpA	0.398121	4.81	NA	0.61493	5.32	WB
269	BoLA-DRB3_00402	INIPLSAQRAKIVAD	4	LSAQRAKIV	0.95	0	OmpA	0.393984	4.91	NA	0.548855	12.07	WB
118	BoLA-DRB3_00403	VNVIDQIHVDPVVRS	3	IDQIHVDPV	0.92	0	OmpA	0.447571	1.34	NA	0.556568	2.64	WB
115	BoLA-DRB3_00403	APGVNVIDQIHVDPV	3	VNVIDQIHV	0.93	0	OmpA	0.433715	1.5	NA	0.468294	10.8	WB
114	BoLA-DRB3_00403	LAPGVNVIDQIHVDP	4	VNVIDQIHV	1	0	OmpA	0.402489	1.89	NA	0.399992	22.51	WB
117	BoLA-DRB3_00403	GVNVIDQIHVDPVVR	4	IDQIHVDPV	0.93	0	OmpA	0.379669	2.24	NA	0.529543	4.31	WB
183	BoLA-DRB3_00403	WPDMKIVNNIEVTGQ	3	MKIVNNIEV	0.88	0	OmpA	0.360345	2.56	NA	0.47455	9.97	WB
277	BoLA-DRB3_00403	RAKIVADYLVARGVA	3	IVADYLVAR	0.78	0	OmpA	0.347315	2.83	NA	0.560308	2.45	WB
116	BoLA-DRB3_00403	PGVNVIDQIHVDPVV	2	VNVIDQIHV	0.59	0	OmpA	0.320023	3.42	NA	0.509769	5.94	WB
184	BoLA-DRB3_00403	PDMKIVNNIEVTGQA	2	MKIVNNIEV	0.65	0	OmpA	0.31884	3.45	NA	0.476025	9.78	WB
119	BoLA-DRB3_00403	NVIDQIHVDPVVRSL	2	IDQIHVDPV	0.72	0	OmpA	0.294124	4.05	NA	0.55044	2.96	WB
182	BoLA-DRB3_00403	TWPDMKIVNNIEVTG	4	MKIVNNIEV	0.96	0	OmpA	0.289177	4.2	NA	0.458332	12.22	WB
235	BoLA-DRB3_00403	ADYEILNRVADKLKA	4	ILNRVADKL	0.89	0	OmpA	0.284979	4.33	NA	0.427817	17.22	WB
276	BoLA-DRB3_00403	QRAKIVADYLVARGV	4	IVADYLVAR	0.77	0	OmpA	0.283251	4.38	NA	0.55289	2.83	WB
121	BoLA-DRB3_00501	IDQIHVDPVVRSLDF	3	IHVDPVVRS	1	0	OmpA	0.627557	0.02	NA	0.569802	0.41	SB
120	BoLA-DRB3_00501	VIDQIHVDPVVRSLD	4	IHVDPVVRS	1	0	OmpA	0.625774	0.02	NA	0.554352	0.62	SB
119	BoLA-DRB3_00501	NVIDQIHVDPVVRSL	5	IHVDPVVRS	0.82	0	OmpA	0.503855	0.09	NA	0.565471	0.46	SB
122	BoLA-DRB3_00501	DQIHVDPVVRSLDFS	2	IHVDPVVRS	1	0	OmpA	0.44241	0.17	NA	0.538	0.97	SB
183	BoLA-DRB3_00501	WPDMKIVNNIEVTGQ	3	MKIVNNIEV	0.83	0	OmpA	0.426841	0.2	NA	0.402234	13.3	SB
118	BoLA-DRB3_00501	VNVIDQIHVDPVVRS	3	IDQIHVDPV	0.55	0	OmpA	0.401908	0.25	NA	0.528727	1.23	SB
184	BoLA-DRB3_00501	PDMKIVNNIEVTGQA	2	MKIVNNIEV	0.6	0	OmpA	0.38295	0.29	NA	0.409065	12.1	SB
277	BoLA-DRB3_00501	RAKIVADYLVARGVA	3	IVADYLVAR	0.94	0	OmpA	0.354819	0.4	NA	0.542764	0.86	SB
182	BoLA-DRB3_00501	TWPDMKIVNNIEVTG	4	MKIVNNIEV	0.96	0	OmpA	0.351508	0.41	NA	0.375237	18.63	SB
276	BoLA-DRB3_00501	QRAKIVADYLVARGV	4	IVADYLVAR	0.97	0	OmpA	0.308331	0.66	NA	0.540425	0.91	SB
287	BoLA-DRB3_00501	ARGVAGDHIATVGLG	3	VAGDHIATV	1	0	OmpA	0.290674	0.79	NA	0.341071	26.9	SB
185	BoLA-DRB3_00501	DMKIVNNIEVTGQAP	3	IVNNIEVTG	0.87	0	OmpA	0.280727	0.88	NA	0.387079	16.14	SB
275	BoLA-DRB3_00501	AQRAKIVADYLVARG	5	IVADYLVAR	0.85	0	OmpA	0.259309	1.09	NA	0.521004	1.49	WB
117	BoLA-DRB3_00501	GVNVIDQIHVDPVVR	4	IDQIHVDPV	0.98	0	OmpA	0.25784	1.11	NA	0.416235	10.91	WB
286	BoLA-DRB3_00501	VARGVAGDHIATVGL	4	VAGDHIATV	1	0	OmpA	0.238971	1.33	NA	0.356183	23.06	WB
303	BoLA-DRB3_00501	VNPIASNATPEGRAK	3	IASNATPEG	1	0	OmpA	0.236045	1.37	NA	0.297519	39.32	WB
181	BoLA-DRB3_00501	STWPDMKIVNNIEVT	5	MKIVNNIEV	0.99	0	OmpA	0.231623	1.44	NA	0.345738	25.7	WB
115	BoLA-DRB3_00501	APGVNVIDQIHVDPV	3	VNVIDQIHV	0.9	0	OmpA	0.231371	1.44	NA	0.339427	27.33	WB
114	BoLA-DRB3_00501	LAPGVNVIDQIHVDP	4	VNVIDQIHV	0.98	0	OmpA	0.219779	1.63	NA	0.308185	36.11	WB
285	BoLA-DRB3_00501	LVARGVAGDHIATVG	5	VAGDHIATV	1	0	OmpA	0.209441	1.8	NA	0.339878	27.21	WB
116	BoLA-DRB3_00501	PGVNVIDQIHVDPVV	5	IDQIHVDPV	0.54	0	OmpA	0.181497	2.4	NA	0.378559	17.91	WB
29	BoLA-DRB3_00501	RPWLIGAVVIPLLIA	3	LIGAVVIPL	0.92	0	OmpA	0.169393	2.75	NA	0.575543	0.34	WB
302	BoLA-DRB3_00501	SVNPIASNATPEGRA	4	IASNATPEG	0.99	0	OmpA	0.163588	2.92	NA	0.285455	43.06	WB
278	BoLA-DRB3_00501	AKIVADYLVARGVAG	2	IVADYLVAR	0.84	0	OmpA	0.160825	3.01	NA	0.528129	1.25	WB
103	BoLA-DRB3_00501	KAALMTALNGLLAPG	3	LMTALNGLL	0.88	0	OmpA	0.139598	3.82	NA	0.459317	5.45	WB
113	BoLA-DRB3_00501	LLAPGVNVIDQIHVD	5	VNVIDQIHV	0.97	0	OmpA	0.133627	4.1	NA	0.342994	26.41	WB
244	BoLA-DRB3_00501	ADKLKACPDARVTIN	3	LKACPDARV	0.99	0	OmpA	0.132778	4.14	NA	0.369665	19.88	WB
288	BoLA-DRB3_00501	RGVAGDHIATVGLGS	2	VAGDHIATV	0.99	0	OmpA	0.131066	4.23	NA	0.316142	33.82	WB
150	BoLA-DRB3_00501	DFGLKVERDTVTLTG	3	LKVERDTVT	0.74	0	OmpA	0.128578	4.36	NA	0.389553	15.67	WB
28	BoLA-DRB3_00501	GRPWLIGAVVIPLLI	4	LIGAVVIPL	0.97	0	OmpA	0.126935	4.44	NA	0.555999	0.59	WB
171	BoLA-DRB3_00501	HKDAVKRAATSTWPD	4	VKRAATSTW	1	0	OmpA	0.123079	4.65	NA	0.336657	28.07	WB
172	BoLA-DRB3_00501	KDAVKRAATSTWPDM	3	VKRAATSTW	1	0	OmpA	0.11943	4.85	NA	0.351311	24.28	WB
130	BoLA-DRB3_00501	VRSLDFSSAEPVFTA	3	LDFSSAEPV	0.98	0	OmpA	0.118776	4.89	NA	0.427511	9.16	WB
120	BoLA-DRB3_00502	VIDQIHVDPVVRSLD	4	IHVDPVVRS	1	0	OmpA	0.421931	0.13	NA	0.498691	0.51	SB
121	BoLA-DRB3_00502	IDQIHVDPVVRSLDF	3	IHVDPVVRS	1	0	OmpA	0.416399	0.14	NA	0.507711	0.39	SB
119	BoLA-DRB3_00502	NVIDQIHVDPVVRSL	5	IHVDPVVRS	0.87	0	OmpA	0.305074	0.36	NA	0.501944	0.46	SB
122	BoLA-DRB3_00502	DQIHVDPVVRSLDFS	2	IHVDPVVRS	1	0	OmpA	0.251626	0.63	NA	0.467875	1.15	SB
277	BoLA-DRB3_00502	RAKIVADYLVARGVA	3	IVADYLVAR	0.98	0	OmpA	0.206474	0.98	NA	0.464362	1.27	SB
276	BoLA-DRB3_00502	QRAKIVADYLVARGV	4	IVADYLVAR	0.97	0	OmpA	0.179675	1.27	NA	0.455058	1.62	WB
118	BoLA-DRB3_00502	VNVIDQIHVDPVVRS	6	IHVDPVVRS	0.65	0	OmpA	0.177959	1.29	NA	0.462625	1.33	WB
183	BoLA-DRB3_00502	WPDMKIVNNIEVTGQ	3	MKIVNNIEV	0.77	0	OmpA	0.144758	1.9	NA	0.311628	21.83	WB
275	BoLA-DRB3_00502	AQRAKIVADYLVARG	5	IVADYLVAR	0.91	0	OmpA	0.144137	1.91	NA	0.433726	2.65	WB
234	BoLA-DRB3_00502	PADYEILNRVADKLK	3	YEILNRVAD	0.94	0	OmpA	0.140308	2.01	NA	0.262668	37.81	WB
184	BoLA-DRB3_00502	PDMKIVNNIEVTGQA	4	IVNNIEVTG	0.45	0	OmpA	0.122597	2.48	NA	0.31634	20.47	WB
287	BoLA-DRB3_00502	ARGVAGDHIATVGLG	3	VAGDHIATV	1	0	OmpA	0.116018	2.71	NA	0.319271	19.69	WB
280	BoLA-DRB3_00502	IVADYLVARGVAGDH	4	YLVARGVAG	1	0	OmpA	0.11289	2.82	NA	0.409308	4.39	WB
281	BoLA-DRB3_00502	VADYLVARGVAGDHI	3	YLVARGVAG	0.99	0	OmpA	0.106371	3.07	NA	0.369006	9.23	WB
185	BoLA-DRB3_00502	DMKIVNNIEVTGQAP	3	IVNNIEVTG	0.9	0	OmpA	0.105215	3.13	NA	0.297902	25.89	WB
233	BoLA-DRB3_00502	IPADYEILNRVADKL	4	YEILNRVAD	0.92	0	OmpA	0.099254	3.4	NA	0.248763	43	WB
303	BoLA-DRB3_00502	VNPIASNATPEGRAK	3	IASNATPEG	1	0	OmpA	0.097535	3.48	NA	0.248421	43.13	WB
222	BoLA-DRB3_00502	PIAFGNDGASLIPAD	3	FGNDGASLI	0.99	0	OmpA	0.096749	3.52	NA	0.403924	4.91	WB
232	BoLA-DRB3_00502	LIPADYEILNRVADK	5	YEILNRVAD	0.9	0	OmpA	0.094416	3.65	NA	0.258282	39.39	WB
182	BoLA-DRB3_00502	TWPDMKIVNNIEVTG	4	MKIVNNIEV	0.9	0	OmpA	0.092268	3.77	NA	0.29658	26.3	WB
286	BoLA-DRB3_00502	VARGVAGDHIATVGL	4	VAGDHIATV	1	0	OmpA	0.088349	3.99	NA	0.330867	16.83	WB
278	BoLA-DRB3_00502	AKIVADYLVARGVAG	2	IVADYLVAR	0.77	0	OmpA	0.087878	4.02	NA	0.460366	1.41	WB
279	BoLA-DRB3_00502	KIVADYLVARGVAGD	5	YLVARGVAG	0.71	0	OmpA	0.083599	4.29	NA	0.446064	1.95	WB
138	BoLA-DRB3_00502	AEPVFTASVPIPDFG	4	FTASVPIPD	0.88	0	OmpA	0.083087	4.32	NA	0.354685	11.65	WB
285	BoLA-DRB3_00502	LVARGVAGDHIATVG	5	VAGDHIATV	0.99	0	OmpA	0.074768	4.93	NA	0.314464	20.98	WB
120	BoLA-DRB3_00503	VIDQIHVDPVVRSLD	4	IHVDPVVRS	0.99	0	OmpA	0.638929	0.16	NA	0.565515	0.43	SB
121	BoLA-DRB3_00503	IDQIHVDPVVRSLDF	3	IHVDPVVRS	1	0	OmpA	0.634433	0.16	NA	0.577072	0.32	SB
277	BoLA-DRB3_00503	RAKIVADYLVARGVA	3	IVADYLVAR	1	0	OmpA	0.549179	0.33	NA	0.576411	0.33	SB
119	BoLA-DRB3_00503	NVIDQIHVDPVVRSL	5	IHVDPVVRS	0.86	0	OmpA	0.528564	0.38	NA	0.574417	0.34	SB
276	BoLA-DRB3_00503	QRAKIVADYLVARGV	4	IVADYLVAR	1	0	OmpA	0.502987	0.46	NA	0.56387	0.45	SB
122	BoLA-DRB3_00503	DQIHVDPVVRSLDFS	2	IHVDPVVRS	0.95	0	OmpA	0.463103	0.62	NA	0.546258	0.72	SB
275	BoLA-DRB3_00503	AQRAKIVADYLVARG	5	IVADYLVAR	0.93	0	OmpA	0.433902	0.78	NA	0.540975	0.83	SB
118	BoLA-DRB3_00503	VNVIDQIHVDPVVRS	3	IDQIHVDPV	0.5	0	OmpA	0.399779	0.99	NA	0.539317	0.87	SB
183	BoLA-DRB3_00503	WPDMKIVNNIEVTGQ	3	MKIVNNIEV	0.78	0	OmpA	0.378939	1.14	NA	0.397504	13.55	WB
184	BoLA-DRB3_00503	PDMKIVNNIEVTGQA	2	MKIVNNIEV	0.54	0	OmpA	0.359459	1.33	NA	0.406241	11.98	WB
115	BoLA-DRB3_00503	APGVNVIDQIHVDPV	3	VNVIDQIHV	0.96	0	OmpA	0.333047	1.58	NA	0.359153	21.59	WB
287	BoLA-DRB3_00503	ARGVAGDHIATVGLG	3	VAGDHIATV	1	0	OmpA	0.330344	1.61	NA	0.341519	25.99	WB
114	BoLA-DRB3_00503	LAPGVNVIDQIHVDP	4	VNVIDQIHV	1	0	OmpA	0.325265	1.66	NA	0.312443	33.96	WB
278	BoLA-DRB3_00503	AKIVADYLVARGVAG	2	IVADYLVAR	0.96	0	OmpA	0.319064	1.74	NA	0.552296	0.61	WB
182	BoLA-DRB3_00503	TWPDMKIVNNIEVTG	4	MKIVNNIEV	0.94	0	OmpA	0.301775	2	NA	0.370197	19.06	WB
185	BoLA-DRB3_00503	DMKIVNNIEVTGQAP	3	IVNNIEVTG	0.88	0	OmpA	0.281463	2.38	NA	0.383928	16.18	WB
286	BoLA-DRB3_00503	VARGVAGDHIATVGL	4	VAGDHIATV	1	0	OmpA	0.281274	2.38	NA	0.357724	21.93	WB
234	BoLA-DRB3_00503	PADYEILNRVADKLK	3	YEILNRVAD	0.78	0	OmpA	0.278718	2.43	NA	0.340727	26.19	WB
117	BoLA-DRB3_00503	GVNVIDQIHVDPVVR	4	IDQIHVDPV	0.95	0	OmpA	0.259233	2.81	NA	0.408102	11.67	WB
285	BoLA-DRB3_00503	LVARGVAGDHIATVG	5	VAGDHIATV	1	0	OmpA	0.254462	2.9	NA	0.344946	25.11	WB
116	BoLA-DRB3_00503	PGVNVIDQIHVDPVV	2	VNVIDQIHV	0.54	0	OmpA	0.226768	3.57	NA	0.386083	15.74	WB
303	BoLA-DRB3_00503	VNPIASNATPEGRAK	3	IASNATPEG	1	0	OmpA	0.214943	3.9	NA	0.31108	34.34	WB
113	BoLA-DRB3_00503	LLAPGVNVIDQIHVD	5	VNVIDQIHV	0.98	0	OmpA	0.214496	3.91	NA	0.346986	24.59	WB
233	BoLA-DRB3_00503	IPADYEILNRVADKL	4	YEILNRVAD	0.84	0	OmpA	0.195155	4.51	NA	0.315107	33.18	WB
181	BoLA-DRB3_00503	STWPDMKIVNNIEVT	5	MKIVNNIEV	1	0	OmpA	0.193331	4.58	NA	0.342143	25.83	WB
274	BoLA-DRB3_00503	SAQRAKIVADYLVAR	6	IVADYLVAR	0.76	0	OmpA	0.183298	4.96	NA	0.522358	1.36	WB
29	BoLA-DRB3_00503	RPWLIGAVVIPLLIA	3	LIGAVVIPL	0.9	0	OmpA	0.182397	5	NA	0.563541	0.45	WB
121	BoLA-DRB3_00504	IDQIHVDPVVRSLDF	3	IHVDPVVRS	1	0	OmpA	0.676624	0.01	NA	0.585167	0.12	SB
120	BoLA-DRB3_00504	VIDQIHVDPVVRSLD	4	IHVDPVVRS	1	0	OmpA	0.676012	0.01	NA	0.567307	0.23	SB
119	BoLA-DRB3_00504	NVIDQIHVDPVVRSL	5	IHVDPVVRS	0.88	0	OmpA	0.542122	0.04	NA	0.57159	0.2	SB
122	BoLA-DRB3_00504	DQIHVDPVVRSLDFS	2	IHVDPVVRS	1	0	OmpA	0.494212	0.07	NA	0.555292	0.38	SB
118	BoLA-DRB3_00504	VNVIDQIHVDPVVRS	6	IHVDPVVRS	0.51	0	OmpA	0.432167	0.15	NA	0.53299	0.8	SB
303	BoLA-DRB3_00504	VNPIASNATPEGRAK	3	IASNATPEG	1	0	OmpA	0.357327	0.3	NA	0.344508	26.48	SB
183	BoLA-DRB3_00504	WPDMKIVNNIEVTGQ	3	MKIVNNIEV	0.79	0	OmpA	0.353548	0.31	NA	0.407266	12.17	SB
184	BoLA-DRB3_00504	PDMKIVNNIEVTGQA	2	MKIVNNIEV	0.53	0	OmpA	0.321157	0.42	NA	0.416078	10.59	SB
185	BoLA-DRB3_00504	DMKIVNNIEVTGQAP	3	IVNNIEVTG	0.86	0	OmpA	0.30206	0.52	NA	0.398419	13.81	SB
287	BoLA-DRB3_00504	ARGVAGDHIATVGLG	3	VAGDHIATV	1	0	OmpA	0.277708	0.69	NA	0.377813	18.12	SB
277	BoLA-DRB3_00504	RAKIVADYLVARGVA	3	IVADYLVAR	0.93	0	OmpA	0.273752	0.72	NA	0.538516	0.67	SB
302	BoLA-DRB3_00504	SVNPIASNATPEGRA	4	IASNATPEG	0.99	0	OmpA	0.262656	0.82	NA	0.333724	29.55	SB
182	BoLA-DRB3_00504	TWPDMKIVNNIEVTG	4	MKIVNNIEV	0.93	0	OmpA	0.260213	0.84	NA	0.378786	17.9	SB
117	BoLA-DRB3_00504	GVNVIDQIHVDPVVR	4	IDQIHVDPV	0.96	0	OmpA	0.250598	0.92	NA	0.40844	11.96	SB
276	BoLA-DRB3_00504	QRAKIVADYLVARGV	4	IVADYLVAR	0.9	0	OmpA	0.22991	1.16	NA	0.527958	0.93	WB
286	BoLA-DRB3_00504	VARGVAGDHIATVGL	4	VAGDHIATV	1	0	OmpA	0.225327	1.22	NA	0.389151	15.69	WB
285	BoLA-DRB3_00504	LVARGVAGDHIATVG	5	VAGDHIATV	1	0	OmpA	0.194003	1.73	NA	0.375203	18.7	WB
275	BoLA-DRB3_00504	AQRAKIVADYLVARG	5	IVADYLVAR	0.83	0	OmpA	0.193019	1.75	NA	0.508444	1.61	WB
304	BoLA-DRB3_00504	NPIASNATPEGRAKN	2	IASNATPEG	0.99	0	OmpA	0.184189	1.95	NA	0.305005	38.38	WB
123	BoLA-DRB3_00504	QIHVDPVVRSLDFSS	1	IHVDPVVRS	0.95	0	OmpA	0.159474	2.61	NA	0.540986	0.61	WB
301	BoLA-DRB3_00504	GSVNPIASNATPEGR	5	IASNATPEG	0.93	0	OmpA	0.155834	2.74	NA	0.313075	35.78	WB
181	BoLA-DRB3_00504	STWPDMKIVNNIEVT	5	MKIVNNIEV	0.99	0	OmpA	0.154206	2.79	NA	0.349377	25.13	WB
150	BoLA-DRB3_00504	DFGLKVERDTVTLTG	3	LKVERDTVT	0.62	0	OmpA	0.151816	2.87	NA	0.402556	13.01	WB
116	BoLA-DRB3_00504	PGVNVIDQIHVDPVV	5	IDQIHVDPV	0.71	0	OmpA	0.147325	3.04	NA	0.383289	16.94	WB
152	BoLA-DRB3_00504	GLKVERDTVTLTGTA	3	VERDTVTLT	0.92	0	OmpA	0.139367	3.38	NA	0.399408	13.62	WB
115	BoLA-DRB3_00504	APGVNVIDQIHVDPV	3	VNVIDQIHV	0.85	0	OmpA	0.139346	3.38	NA	0.331391	30.23	WB
186	BoLA-DRB3_00504	MKIVNNIEVTGQAPP	2	IVNNIEVTG	0.8	0	OmpA	0.133126	3.68	NA	0.369009	20.15	WB
244	BoLA-DRB3_00504	ADKLKACPDARVTIN	3	LKACPDARV	0.99	0	OmpA	0.131993	3.73	NA	0.378376	17.99	WB
171	BoLA-DRB3_00504	HKDAVKRAATSTWPD	4	VKRAATSTW	0.98	0	OmpA	0.131422	3.76	NA	0.343466	26.76	WB
114	BoLA-DRB3_00504	LAPGVNVIDQIHVDP	4	VNVIDQIHV	0.96	0	OmpA	0.130574	3.81	NA	0.282978	45.4	WB
172	BoLA-DRB3_00504	KDAVKRAATSTWPDM	3	VKRAATSTW	0.98	0	OmpA	0.12841	3.92	NA	0.357746	22.98	WB
151	BoLA-DRB3_00504	FGLKVERDTVTLTGT	4	VERDTVTLT	0.75	0	OmpA	0.127963	3.94	NA	0.407136	12.19	WB
29	BoLA-DRB3_00504	RPWLIGAVVIPLLIA	3	LIGAVVIPL	0.91	0	OmpA	0.127228	3.98	NA	0.566503	0.24	WB
59	BoLA-DRB3_00504	PTGVLPTLTPTSTRG	3	VLPTLTPTS	1	0	OmpA	0.125848	4.06	NA	0.426259	8.97	WB
288	BoLA-DRB3_00504	RGVAGDHIATVGLGS	2	VAGDHIATV	0.98	0	OmpA	0.123335	4.2	NA	0.358859	22.7	WB
278	BoLA-DRB3_00504	AKIVADYLVARGVAG	2	IVADYLVAR	0.78	0	OmpA	0.11558	4.67	NA	0.532215	0.82	WB
120	BoLA-DRB3_00505	VIDQIHVDPVVRSLD	4	IHVDPVVRS	0.99	0	OmpA	0.326144	0.36	NA	0.4756	1.8	SB
121	BoLA-DRB3_00505	IDQIHVDPVVRSLDF	3	IHVDPVVRS	1	0	OmpA	0.317551	0.39	NA	0.476393	1.77	SB
234	BoLA-DRB3_00505	PADYEILNRVADKLK	3	YEILNRVAD	0.98	0	OmpA	0.281143	0.56	NA	0.287905	34.01	SB
119	BoLA-DRB3_00505	NVIDQIHVDPVVRSL	5	IHVDPVVRS	0.83	0	OmpA	0.230204	0.96	NA	0.485235	1.44	SB
183	BoLA-DRB3_00505	WPDMKIVNNIEVTGQ	3	MKIVNNIEV	0.73	0	OmpA	0.220315	1.07	NA	0.365253	13.65	WB
233	BoLA-DRB3_00505	IPADYEILNRVADKL	4	YEILNRVAD	0.92	0	OmpA	0.208425	1.22	NA	0.281185	36.09	WB
232	BoLA-DRB3_00505	LIPADYEILNRVADK	5	YEILNRVAD	0.91	0	OmpA	0.196248	1.41	NA	0.292245	32.62	WB
184	BoLA-DRB3_00505	PDMKIVNNIEVTGQA	2	MKIVNNIEV	0.58	0	OmpA	0.189402	1.52	NA	0.368042	13.09	WB
122	BoLA-DRB3_00505	DQIHVDPVVRSLDFS	2	IHVDPVVRS	0.99	0	OmpA	0.186097	1.59	NA	0.43185	4.56	WB
277	BoLA-DRB3_00505	RAKIVADYLVARGVA	3	IVADYLVAR	0.97	0	OmpA	0.180736	1.69	NA	0.446985	3.41	WB
118	BoLA-DRB3_00505	VNVIDQIHVDPVVRS	6	IHVDPVVRS	0.48	0	OmpA	0.160642	2.13	NA	0.454633	2.92	WB
182	BoLA-DRB3_00505	TWPDMKIVNNIEVTG	4	MKIVNNIEV	0.91	0	OmpA	0.154385	2.31	NA	0.351688	16.56	WB
276	BoLA-DRB3_00505	QRAKIVADYLVARGV	4	IVADYLVAR	0.93	0	OmpA	0.149561	2.44	NA	0.4392	3.96	WB
280	BoLA-DRB3_00505	IVADYLVARGVAGDH	4	YLVARGVAG	0.98	0	OmpA	0.149335	2.45	NA	0.412736	6.47	WB
281	BoLA-DRB3_00505	VADYLVARGVAGDHI	3	YLVARGVAG	0.98	0	OmpA	0.145478	2.58	NA	0.380249	10.99	WB
185	BoLA-DRB3_00505	DMKIVNNIEVTGQAP	3	IVNNIEVTG	0.85	0	OmpA	0.133323	3.02	NA	0.352251	16.43	WB
138	BoLA-DRB3_00505	AEPVFTASVPIPDFG	4	FTASVPIPD	0.83	0	OmpA	0.121912	3.5	NA	0.400567	7.97	WB
275	BoLA-DRB3_00505	AQRAKIVADYLVARG	5	IVADYLVAR	0.85	0	OmpA	0.120389	3.57	NA	0.41797	5.88	WB
235	BoLA-DRB3_00505	ADYEILNRVADKLKA	2	YEILNRVAD	0.83	0	OmpA	0.110025	4.11	NA	0.290925	33.05	WB
279	BoLA-DRB3_00505	KIVADYLVARGVAGD	5	YLVARGVAG	0.84	0	OmpA	0.106578	4.33	NA	0.441325	3.81	WB
139	BoLA-DRB3_00505	EPVFTASVPIPDFGL	3	FTASVPIPD	0.95	0	OmpA	0.101561	4.66	NA	0.406912	7.18	WB
287	BoLA-DRB3_00505	ARGVAGDHIATVGLG	3	VAGDHIATV	0.99	0	OmpA	0.10108	4.69	NA	0.326417	22.71	WB
303	BoLA-DRB3_00505	VNPIASNATPEGRAK	3	IASNATPEG	0.98	0	OmpA	0.097555	4.93	NA	0.260299	43.21	WB
120	BoLA-DRB3_00506	VIDQIHVDPVVRSLD	4	IHVDPVVRS	0.98	0	OmpA	0.403385	0.13	NA	0.527711	1.06	SB
121	BoLA-DRB3_00506	IDQIHVDPVVRSLDF	3	IHVDPVVRS	1	0	OmpA	0.397099	0.14	NA	0.535813	0.86	SB
119	BoLA-DRB3_00506	NVIDQIHVDPVVRSL	5	IHVDPVVRS	0.89	0	OmpA	0.287848	0.43	NA	0.535605	0.86	SB
122	BoLA-DRB3_00506	DQIHVDPVVRSLDFS	2	IHVDPVVRS	0.97	0	OmpA	0.250724	0.66	NA	0.491226	2.49	SB
277	BoLA-DRB3_00506	RAKIVADYLVARGVA	3	IVADYLVAR	0.96	0	OmpA	0.220415	0.9	NA	0.509744	1.64	SB
234	BoLA-DRB3_00506	PADYEILNRVADKLK	3	YEILNRVAD	0.93	0	OmpA	0.194579	1.22	NA	0.305514	37.92	WB
118	BoLA-DRB3_00506	VNVIDQIHVDPVVRS	6	IHVDPVVRS	0.6	0	OmpA	0.191207	1.26	NA	0.502623	1.94	WB
276	BoLA-DRB3_00506	QRAKIVADYLVARGV	4	IVADYLVAR	0.96	0	OmpA	0.190591	1.27	NA	0.505012	1.84	WB
183	BoLA-DRB3_00506	WPDMKIVNNIEVTGQ	3	MKIVNNIEV	0.75	0	OmpA	0.160319	1.84	NA	0.371971	18.87	WB
275	BoLA-DRB3_00506	AQRAKIVADYLVARG	5	IVADYLVAR	0.92	0	OmpA	0.154083	1.98	NA	0.48599	2.8	WB
280	BoLA-DRB3_00506	IVADYLVARGVAGDH	4	YLVARGVAG	0.98	0	OmpA	0.144716	2.23	NA	0.451391	5.62	WB
233	BoLA-DRB3_00506	IPADYEILNRVADKL	4	YEILNRVAD	0.93	0	OmpA	0.142065	2.31	NA	0.296703	40.83	WB
281	BoLA-DRB3_00506	VADYLVARGVAGDHI	3	YLVARGVAG	0.99	0	OmpA	0.141589	2.32	NA	0.402041	12.51	WB
138	BoLA-DRB3_00506	AEPVFTASVPIPDFG	4	FTASVPIPD	0.88	0	OmpA	0.138807	2.4	NA	0.43198	7.9	WB
184	BoLA-DRB3_00506	PDMKIVNNIEVTGQA	2	MKIVNNIEV	0.51	0	OmpA	0.135234	2.5	NA	0.376975	17.7	WB
232	BoLA-DRB3_00506	LIPADYEILNRVADK	5	YEILNRVAD	0.87	0	OmpA	0.130129	2.69	NA	0.308749	36.87	WB
287	BoLA-DRB3_00506	ARGVAGDHIATVGLG	3	VAGDHIATV	1	0	OmpA	0.122217	2.98	NA	0.391718	14.56	WB
139	BoLA-DRB3_00506	EPVFTASVPIPDFGL	3	FTASVPIPD	0.97	0	OmpA	0.121767	3	NA	0.432882	7.77	WB
182	BoLA-DRB3_00506	TWPDMKIVNNIEVTG	4	MKIVNNIEV	0.92	0	OmpA	0.110641	3.52	NA	0.355775	22.83	WB
278	BoLA-DRB3_00506	AKIVADYLVARGVAG	2	IVADYLVAR	0.74	0	OmpA	0.1094	3.58	NA	0.51424	1.47	WB
279	BoLA-DRB3_00506	KIVADYLVARGVAGD	5	YLVARGVAG	0.77	0	OmpA	0.10278	3.94	NA	0.495211	2.3	WB
185	BoLA-DRB3_00506	DMKIVNNIEVTGQAP	3	IVNNIEVTG	0.81	0	OmpA	0.098642	4.18	NA	0.356016	22.76	WB
286	BoLA-DRB3_00506	VARGVAGDHIATVGL	4	VAGDHIATV	1	0	OmpA	0.096457	4.31	NA	0.396622	13.58	WB
137	BoLA-DRB3_00506	SAEPVFTASVPIPDF	5	FTASVPIPD	0.75	0	OmpA	0.094811	4.41	NA	0.442294	6.58	WB
222	BoLA-DRB3_00506	PIAFGNDGASLIPAD	3	FGNDGASLI	0.99	0	OmpA	0.094548	4.42	NA	0.454636	5.31	WB
183	BoLA-DRB3_00507	WPDMKIVNNIEVTGQ	3	MKIVNNIEV	0.97	0	OmpA	0.406132	0.52	NA	0.301445	23.42	SB
280	BoLA-DRB3_00507	IVADYLVARGVAGDH	4	YLVARGVAG	1	0	OmpA	0.381575	0.62	NA	0.430691	3.4	SB
281	BoLA-DRB3_00507	VADYLVARGVAGDHI	3	YLVARGVAG	1	0	OmpA	0.363868	0.71	NA	0.428201	3.56	SB
182	BoLA-DRB3_00507	TWPDMKIVNNIEVTG	4	MKIVNNIEV	1	0	OmpA	0.335001	0.88	NA	0.287422	27.13	SB
184	BoLA-DRB3_00507	PDMKIVNNIEVTGQA	2	MKIVNNIEV	0.92	0	OmpA	0.304547	1.1	NA	0.29719	24.51	WB
120	BoLA-DRB3_00507	VIDQIHVDPVVRSLD	4	IHVDPVVRS	0.99	0	OmpA	0.28514	1.28	NA	0.378095	8.44	WB
121	BoLA-DRB3_00507	IDQIHVDPVVRSLDF	3	IHVDPVVRS	1	0	OmpA	0.278362	1.36	NA	0.389483	6.99	WB
279	BoLA-DRB3_00507	KIVADYLVARGVAGD	5	YLVARGVAG	0.98	0	OmpA	0.277476	1.36	NA	0.441822	2.74	WB
181	BoLA-DRB3_00507	STWPDMKIVNNIEVT	5	MKIVNNIEV	1	0	OmpA	0.211465	2.33	NA	0.287136	27.21	WB
119	BoLA-DRB3_00507	NVIDQIHVDPVVRSL	5	IHVDPVVRS	0.75	0	OmpA	0.199878	2.55	NA	0.383007	7.82	WB
282	BoLA-DRB3_00507	ADYLVARGVAGDHIA	2	YLVARGVAG	1	0	OmpA	0.199272	2.56	NA	0.401978	5.69	WB
118	BoLA-DRB3_00507	VNVIDQIHVDPVVRS	3	IDQIHVDPV	0.58	0	OmpA	0.152977	3.79	NA	0.34738	13.26	WB
122	BoLA-DRB3_00507	DQIHVDPVVRSLDFS	2	IHVDPVVRS	0.99	0	OmpA	0.149138	3.94	NA	0.348202	13.11	WB
244	BoLA-DRB3_00507	ADKLKACPDARVTIN	3	LKACPDARV	1	0	OmpA	0.149058	3.94	NA	0.308279	21.63	WB
150	BoLA-DRB3_00507	DFGLKVERDTVTLTG	3	LKVERDTVT	0.93	0	OmpA	0.139373	4.31	NA	0.270831	32.05	WB
234	BoLA-DRB3_00507	PADYEILNRVADKLK	3	YEILNRVAD	0.96	0	OmpA	0.129617	4.72	NA	0.289212	26.63	WB
120	BoLA-DRB3_00508	VIDQIHVDPVVRSLD	4	IHVDPVVRS	0.99	0	OmpA	0.585156	0.01	NA	0.53433	0.27	SB
121	BoLA-DRB3_00508	IDQIHVDPVVRSLDF	3	IHVDPVVRS	1	0	OmpA	0.584619	0.01	NA	0.548533	0.17	SB
119	BoLA-DRB3_00508	NVIDQIHVDPVVRSL	5	IHVDPVVRS	0.91	0	OmpA	0.437995	0.07	NA	0.541858	0.21	SB
277	BoLA-DRB3_00508	RAKIVADYLVARGVA	3	IVADYLVAR	0.98	0	OmpA	0.424649	0.08	NA	0.546693	0.18	SB
122	BoLA-DRB3_00508	DQIHVDPVVRSLDFS	2	IHVDPVVRS	1	0	OmpA	0.391358	0.13	NA	0.518234	0.45	SB
276	BoLA-DRB3_00508	QRAKIVADYLVARGV	4	IVADYLVAR	0.97	0	OmpA	0.377991	0.15	NA	0.537106	0.25	SB
118	BoLA-DRB3_00508	VNVIDQIHVDPVVRS	6	IHVDPVVRS	0.55	0	OmpA	0.330373	0.25	NA	0.505292	0.68	SB
275	BoLA-DRB3_00508	AQRAKIVADYLVARG	5	IVADYLVAR	0.95	0	OmpA	0.303824	0.35	NA	0.514537	0.51	SB
183	BoLA-DRB3_00508	WPDMKIVNNIEVTGQ	3	MKIVNNIEV	0.77	0	OmpA	0.276711	0.47	NA	0.359019	15.67	SB
184	BoLA-DRB3_00508	PDMKIVNNIEVTGQA	4	IVNNIEVTG	0.52	0	OmpA	0.264738	0.55	NA	0.368694	13.64	SB
287	BoLA-DRB3_00508	ARGVAGDHIATVGLG	3	VAGDHIATV	1	0	OmpA	0.246839	0.69	NA	0.334206	21.54	SB
185	BoLA-DRB3_00508	DMKIVNNIEVTGQAP	3	IVNNIEVTG	0.9	0	OmpA	0.235766	0.79	NA	0.354149	16.75	SB
286	BoLA-DRB3_00508	VARGVAGDHIATVGL	4	VAGDHIATV	1	0	OmpA	0.203219	1.21	NA	0.34486	18.92	WB
278	BoLA-DRB3_00508	AKIVADYLVARGVAG	2	IVADYLVAR	0.87	0	OmpA	0.199848	1.26	NA	0.53348	0.28	WB
182	BoLA-DRB3_00508	TWPDMKIVNNIEVTG	4	MKIVNNIEV	0.91	0	OmpA	0.199778	1.26	NA	0.341852	19.65	WB
115	BoLA-DRB3_00508	APGVNVIDQIHVDPV	3	VNVIDQIHV	0.9	0	OmpA	0.195807	1.31	NA	0.323133	24.46	WB
117	BoLA-DRB3_00508	GVNVIDQIHVDPVVR	4	IDQIHVDPV	0.93	0	OmpA	0.191068	1.39	NA	0.38407	10.77	WB
114	BoLA-DRB3_00508	LAPGVNVIDQIHVDP	4	VNVIDQIHV	0.95	0	OmpA	0.190743	1.39	NA	0.273236	39.95	WB
303	BoLA-DRB3_00508	VNPIASNATPEGRAK	3	IASNATPEG	1	0	OmpA	0.183854	1.51	NA	0.275364	39.26	WB
285	BoLA-DRB3_00508	LVARGVAGDHIATVG	5	VAGDHIATV	1	0	OmpA	0.176667	1.67	NA	0.334215	21.54	WB
116	BoLA-DRB3_00508	PGVNVIDQIHVDPVV	5	IDQIHVDPV	0.46	0	OmpA	0.138241	2.83	NA	0.356169	16.3	WB
234	BoLA-DRB3_00508	PADYEILNRVADKLK	3	YEILNRVAD	0.77	0	OmpA	0.137248	2.87	NA	0.297392	32.04	WB
302	BoLA-DRB3_00508	SVNPIASNATPEGRA	4	IASNATPEG	0.98	0	OmpA	0.123517	3.47	NA	0.269027	41.36	WB
113	BoLA-DRB3_00508	LLAPGVNVIDQIHVD	5	VNVIDQIHV	0.94	0	OmpA	0.121264	3.59	NA	0.308493	28.63	WB
181	BoLA-DRB3_00508	STWPDMKIVNNIEVT	5	MKIVNNIEV	1	0	OmpA	0.112899	4.05	NA	0.317499	25.99	WB
288	BoLA-DRB3_00508	RGVAGDHIATVGLGS	2	VAGDHIATV	0.97	0	OmpA	0.105993	4.5	NA	0.312644	27.41	WB
186	BoLA-DRB3_00508	MKIVNNIEVTGQAPP	2	IVNNIEVTG	0.73	0	OmpA	0.100941	4.87	NA	0.330791	22.42	WB
123	BoLA-DRB3_00508	QIHVDPVVRSLDFSS	1	IHVDPVVRS	0.9	0	OmpA	0.100189	4.92	NA	0.501009	0.78	WB
171	BoLA-DRB3_00508	HKDAVKRAATSTWPD	4	VKRAATSTW	0.98	0	OmpA	0.099651	4.96	NA	0.318896	25.62	WB
183	BoLA-DRB3_00601	WPDMKIVNNIEVTGQ	3	MKIVNNIEV	0.99	0	OmpA	0.379922	0.76	NA	0.405725	5.69	SB
182	BoLA-DRB3_00601	TWPDMKIVNNIEVTG	4	MKIVNNIEV	0.99	0	OmpA	0.334706	1.07	NA	0.397807	6.6	WB
184	BoLA-DRB3_00601	PDMKIVNNIEVTGQA	2	MKIVNNIEV	0.94	0	OmpA	0.280643	1.61	NA	0.395781	6.85	WB
138	BoLA-DRB3_00601	AEPVFTASVPIPDFG	4	FTASVPIPD	0.9	0	OmpA	0.278967	1.64	NA	0.421326	4.3	WB
118	BoLA-DRB3_00601	VNVIDQIHVDPVVRS	3	IDQIHVDPV	0.88	0	OmpA	0.25398	2.02	NA	0.460359	1.89	WB
181	BoLA-DRB3_00601	STWPDMKIVNNIEVT	5	MKIVNNIEV	0.99	0	OmpA	0.248632	2.12	NA	0.394348	7.03	WB
139	BoLA-DRB3_00601	EPVFTASVPIPDFGL	3	FTASVPIPD	0.97	0	OmpA	0.238422	2.32	NA	0.430366	3.6	WB
137	BoLA-DRB3_00601	SAEPVFTASVPIPDF	5	FTASVPIPD	0.65	0	OmpA	0.236947	2.35	NA	0.434432	3.33	WB
130	BoLA-DRB3_00601	VRSLDFSSAEPVFTA	3	LDFSSAEPV	0.86	0	OmpA	0.232894	2.42	NA	0.552838	0.16	WB
117	BoLA-DRB3_00601	GVNVIDQIHVDPVVR	4	IDQIHVDPV	0.97	0	OmpA	0.214283	2.84	NA	0.412319	5.05	WB
115	BoLA-DRB3_00601	APGVNVIDQIHVDPV	3	VNVIDQIHV	0.72	0	OmpA	0.214023	2.85	NA	0.391233	7.42	WB
212	BoLA-DRB3_00601	QSAINAVTGGPIAFG	3	INAVTGGPI	1	0	OmpA	0.211466	2.91	NA	0.443822	2.76	WB
114	BoLA-DRB3_00601	LAPGVNVIDQIHVDP	4	VNVIDQIHV	0.97	0	OmpA	0.208203	2.99	NA	0.325511	19.82	WB
129	BoLA-DRB3_00601	VVRSLDFSSAEPVFT	4	LDFSSAEPV	0.93	0	OmpA	0.197383	3.31	NA	0.540377	0.24	WB
280	BoLA-DRB3_00601	IVADYLVARGVAGDH	4	YLVARGVAG	0.99	0	OmpA	0.189927	3.54	NA	0.301245	26.52	WB
211	BoLA-DRB3_00601	LQSAINAVTGGPIAF	4	INAVTGGPI	1	0	OmpA	0.181579	3.82	NA	0.461226	1.86	WB
210	BoLA-DRB3_00601	DLQSAINAVTGGPIA	5	INAVTGGPI	0.98	0	OmpA	0.171727	4.17	NA	0.443261	2.79	WB
136	BoLA-DRB3_00601	SSAEPVFTASVPIPD	4	PVFTASVPI	0.5	0	OmpA	0.170991	4.2	NA	0.402834	6.01	WB
131	BoLA-DRB3_00601	RSLDFSSAEPVFTAS	4	FSSAEPVFT	0.53	0	OmpA	0.16336	4.49	NA	0.527031	0.36	WB
116	BoLA-DRB3_00601	PGVNVIDQIHVDPVV	5	IDQIHVDPV	0.63	0	OmpA	0.162638	4.52	NA	0.406128	5.65	WB
244	BoLA-DRB3_00601	ADKLKACPDARVTIN	3	LKACPDARV	1	0	OmpA	0.157341	4.75	NA	0.348045	14.64	WB
128	BoLA-DRB3_00601	PVVRSLDFSSAEPVF	5	LDFSSAEPV	0.97	0	OmpA	0.156217	4.8	NA	0.51795	0.47	WB
212	BoLA-DRB3_00701	QSAINAVTGGPIAFG	3	INAVTGGPI	1	0	OmpA	0.608234	0.03	NA	0.576606	0.9	SB
211	BoLA-DRB3_00701	LQSAINAVTGGPIAF	4	INAVTGGPI	1	0	OmpA	0.551671	0.07	NA	0.600556	0.49	SB
210	BoLA-DRB3_00701	DLQSAINAVTGGPIA	5	INAVTGGPI	1	0	OmpA	0.542149	0.08	NA	0.568654	1.11	SB
183	BoLA-DRB3_00701	WPDMKIVNNIEVTGQ	3	MKIVNNIEV	0.95	0	OmpA	0.418235	0.36	NA	0.399616	20.59	SB
114	BoLA-DRB3_00701	LAPGVNVIDQIHVDP	4	VNVIDQIHV	0.98	0	OmpA	0.373112	0.59	NA	0.355462	32.49	SB
213	BoLA-DRB3_00701	SAINAVTGGPIAFGN	2	INAVTGGPI	0.98	0	OmpA	0.365172	0.64	NA	0.550698	1.69	SB
182	BoLA-DRB3_00701	TWPDMKIVNNIEVTG	4	MKIVNNIEV	0.97	0	OmpA	0.364289	0.65	NA	0.390835	22.82	SB
115	BoLA-DRB3_00701	APGVNVIDQIHVDPV	3	VNVIDQIHV	0.85	0	OmpA	0.363988	0.65	NA	0.388716	23.37	SB
209	BoLA-DRB3_00701	ADLQSAINAVTGGPI	6	INAVTGGPI	0.84	0	OmpA	0.352951	0.74	NA	0.540009	2.17	SB
184	BoLA-DRB3_00701	PDMKIVNNIEVTGQA	2	MKIVNNIEV	0.86	0	OmpA	0.349774	0.76	NA	0.392041	22.5	SB
118	BoLA-DRB3_00701	VNVIDQIHVDPVVRS	3	IDQIHVDPV	0.85	0	OmpA	0.283224	1.56	NA	0.444365	11.72	WB
181	BoLA-DRB3_00701	STWPDMKIVNNIEVT	5	MKIVNNIEV	0.97	0	OmpA	0.272751	1.75	NA	0.386962	23.82	WB
116	BoLA-DRB3_00701	PGVNVIDQIHVDPVV	2	VNVIDQIHV	0.6	0	OmpA	0.269715	1.82	NA	0.401837	20.06	WB
234	BoLA-DRB3_00701	PADYEILNRVADKLK	3	YEILNRVAD	0.74	0	OmpA	0.265391	1.9	NA	0.464413	8.72	WB
113	BoLA-DRB3_00701	LLAPGVNVIDQIHVD	5	VNVIDQIHV	0.97	0	OmpA	0.264438	1.92	NA	0.375522	26.77	WB
269	BoLA-DRB3_00701	INIPLSAQRAKIVAD	4	LSAQRAKIV	0.98	0	OmpA	0.251805	2.24	NA	0.505548	4.31	WB
270	BoLA-DRB3_00701	NIPLSAQRAKIVADY	3	LSAQRAKIV	0.98	0	OmpA	0.246832	2.37	NA	0.486162	6.11	WB
88	BoLA-DRB3_00701	GNTVTLIGDFPDEAA	3	VTLIGDFPD	0.96	0	OmpA	0.243395	2.46	NA	0.333417	39.05	WB
117	BoLA-DRB3_00701	GVNVIDQIHVDPVVR	4	IDQIHVDPV	0.9	0	OmpA	0.239289	2.58	NA	0.414987	17.21	WB
130	BoLA-DRB3_00701	VRSLDFSSAEPVFTA	3	LDFSSAEPV	0.96	0	OmpA	0.231476	2.81	NA	0.513412	3.72	WB
244	BoLA-DRB3_00701	ADKLKACPDARVTIN	3	LKACPDARV	1	0	OmpA	0.224639	3.01	NA	0.433516	13.58	WB
138	BoLA-DRB3_00701	AEPVFTASVPIPDFG	4	FTASVPIPD	0.79	0	OmpA	0.223826	3.04	NA	0.411751	17.88	WB
137	BoLA-DRB3_00701	SAEPVFTASVPIPDF	5	FTASVPIPD	0.49	0	OmpA	0.216422	3.3	NA	0.419584	16.25	WB
189	BoLA-DRB3_00701	VNNIEVTGQAPPGPP	3	IEVTGQAPP	1	0	OmpA	0.213993	3.39	NA	0.265	60.39	WB
87	BoLA-DRB3_00701	SGNTVTLIGDFPDEA	4	VTLIGDFPD	0.96	0	OmpA	0.212769	3.43	NA	0.305641	47.81	WB
243	BoLA-DRB3_00701	VADKLKACPDARVTI	4	LKACPDARV	1	0	OmpA	0.203264	3.8	NA	0.438179	12.77	WB
119	BoLA-DRB3_00701	NVIDQIHVDPVVRSL	2	IDQIHVDPV	0.6	0	OmpA	0.200171	3.92	NA	0.432885	13.69	WB
129	BoLA-DRB3_00701	VVRSLDFSSAEPVFT	4	LDFSSAEPV	0.96	0	OmpA	0.194789	4.15	NA	0.518552	3.36	WB
171	BoLA-DRB3_00701	HKDAVKRAATSTWPD	4	VKRAATSTW	0.96	0	OmpA	0.19423	4.18	NA	0.363586	30.14	WB
103	BoLA-DRB3_00701	KAALMTALNGLLAPG	4	MTALNGLLA	0.59	0	OmpA	0.190726	4.33	NA	0.50421	4.41	WB
242	BoLA-DRB3_00701	RVADKLKACPDARVT	5	LKACPDARV	0.99	0	OmpA	0.19014	4.35	NA	0.422161	15.72	WB
291	BoLA-DRB3_00701	AGDHIATVGLGSVNP	4	IATVGLGSV	0.91	0	OmpA	0.183587	4.67	NA	0.357709	31.84	WB
232	BoLA-DRB3_00701	LIPADYEILNRVADK	5	YEILNRVAD	0.9	0	OmpA	0.183475	4.68	NA	0.351475	33.64	WB
233	BoLA-DRB3_00701	IPADYEILNRVADKL	4	YEILNRVAD	0.85	0	OmpA	0.18326	4.69	NA	0.391605	22.62	WB
172	BoLA-DRB3_00701	KDAVKRAATSTWPDM	3	VKRAATSTW	0.94	0	OmpA	0.182968	4.7	NA	0.380092	25.55	WB
136	BoLA-DRB3_00701	SSAEPVFTASVPIPD	4	PVFTASVPI	0.57	0	OmpA	0.182647	4.72	NA	0.378929	25.86	WB
139	BoLA-DRB3_00701	EPVFTASVPIPDFGL	3	FTASVPIPD	0.9	0	OmpA	0.182628	4.72	NA	0.433546	13.58	WB
183	BoLA-DRB3_00702	WPDMKIVNNIEVTGQ	3	MKIVNNIEV	0.94	0	OmpA	0.448016	0.4	NA	0.281428	27.51	SB
212	BoLA-DRB3_00702	QSAINAVTGGPIAFG	3	INAVTGGPI	1	0	OmpA	0.384442	0.73	NA	0.424576	5.13	SB
184	BoLA-DRB3_00702	PDMKIVNNIEVTGQA	2	MKIVNNIEV	0.83	0	OmpA	0.383365	0.74	NA	0.283483	26.98	SB
138	BoLA-DRB3_00702	AEPVFTASVPIPDFG	4	FTASVPIPD	0.86	0	OmpA	0.365483	0.87	NA	0.355391	12.66	SB
244	BoLA-DRB3_00702	ADKLKACPDARVTIN	3	LKACPDARV	1	0	OmpA	0.365353	0.87	NA	0.36555	11.27	SB
182	BoLA-DRB3_00702	TWPDMKIVNNIEVTG	4	MKIVNNIEV	0.98	0	OmpA	0.363578	0.88	NA	0.259395	33.72	SB
139	BoLA-DRB3_00702	EPVFTASVPIPDFGL	3	FTASVPIPD	0.95	0	OmpA	0.352073	0.98	NA	0.384302	8.9	SB
280	BoLA-DRB3_00702	IVADYLVARGVAGDH	4	YLVARGVAG	0.93	0	OmpA	0.326974	1.22	NA	0.392696	7.97	WB
120	BoLA-DRB3_00702	VIDQIHVDPVVRSLD	4	IHVDPVVRS	0.9	0	OmpA	0.304919	1.49	NA	0.344809	14.24	WB
281	BoLA-DRB3_00702	VADYLVARGVAGDHI	3	YLVARGVAG	0.93	0	OmpA	0.302168	1.53	NA	0.389017	8.38	WB
243	BoLA-DRB3_00702	VADKLKACPDARVTI	4	LKACPDARV	1	0	OmpA	0.30205	1.53	NA	0.365454	11.28	WB
121	BoLA-DRB3_00702	IDQIHVDPVVRSLDF	3	IHVDPVVRS	0.97	0	OmpA	0.299397	1.57	NA	0.344011	14.37	WB
211	BoLA-DRB3_00702	LQSAINAVTGGPIAF	4	INAVTGGPI	0.99	0	OmpA	0.296953	1.6	NA	0.433003	4.51	WB
137	BoLA-DRB3_00702	SAEPVFTASVPIPDF	5	FTASVPIPD	0.67	0	OmpA	0.264188	2.19	NA	0.344141	14.35	WB
118	BoLA-DRB3_00702	VNVIDQIHVDPVVRS	3	IDQIHVDPV	0.81	0	OmpA	0.263647	2.2	NA	0.342406	14.62	WB
130	BoLA-DRB3_00702	VRSLDFSSAEPVFTA	3	LDFSSAEPV	0.83	0	OmpA	0.259252	2.28	NA	0.464106	2.81	WB
210	BoLA-DRB3_00702	DLQSAINAVTGGPIA	5	INAVTGGPI	0.85	0	OmpA	0.241746	2.67	NA	0.405563	6.71	WB
157	BoLA-DRB3_00702	RDTVTLTGTAPSSEH	3	VTLTGTAPS	0.99	0	OmpA	0.239676	2.72	NA	0.361934	11.75	WB
242	BoLA-DRB3_00702	RVADKLKACPDARVT	5	LKACPDARV	1	0	OmpA	0.238205	2.76	NA	0.339217	15.13	WB
303	BoLA-DRB3_00702	VNPIASNATPEGRAK	3	IASNATPEG	0.99	0	OmpA	0.228623	3	NA	0.196865	53.9	WB
119	BoLA-DRB3_00702	NVIDQIHVDPVVRSL	5	IHVDPVVRS	0.58	0	OmpA	0.224719	3.11	NA	0.361501	11.8	WB
270	BoLA-DRB3_00702	NIPLSAQRAKIVADY	3	LSAQRAKIV	0.99	0	OmpA	0.218051	3.31	NA	0.397332	7.49	WB
181	BoLA-DRB3_00702	STWPDMKIVNNIEVT	5	MKIVNNIEV	1	0	OmpA	0.215008	3.4	NA	0.247019	37.38	WB
279	BoLA-DRB3_00702	KIVADYLVARGVAGD	5	YLVARGVAG	0.87	0	OmpA	0.210786	3.53	NA	0.380437	9.35	WB
126	BoLA-DRB3_00702	VDPVVRSLDFSSAEP	3	VVRSLDFSS	0.82	0	OmpA	0.205637	3.7	NA	0.319022	18.86	WB
117	BoLA-DRB3_00702	GVNVIDQIHVDPVVR	4	IDQIHVDPV	0.93	0	OmpA	0.195217	4.07	NA	0.269379	30.8	WB
156	BoLA-DRB3_00702	ERDTVTLTGTAPSSE	4	VTLTGTAPS	0.99	0	OmpA	0.191451	4.23	NA	0.339113	15.15	WB
245	BoLA-DRB3_00702	DKLKACPDARVTING	2	LKACPDARV	0.99	0	OmpA	0.190474	4.27	NA	0.328742	16.93	WB
269	BoLA-DRB3_00702	INIPLSAQRAKIVAD	4	LSAQRAKIV	1	0	OmpA	0.187786	4.39	NA	0.425693	5.05	WB
282	BoLA-DRB3_00702	ADYLVARGVAGDHIA	2	YLVARGVAG	0.83	0	OmpA	0.186684	4.43	NA	0.392821	7.95	WB
131	BoLA-DRB3_00702	RSLDFSSAEPVFTAS	2	LDFSSAEPV	0.51	0	OmpA	0.182566	4.62	NA	0.45518	3.25	WB
234	BoLA-DRB3_00702	PADYEILNRVADKLK	3	YEILNRVAD	0.85	0	OmpA	0.181516	4.67	NA	0.308858	20.95	WB
129	BoLA-DRB3_00702	VVRSLDFSSAEPVFT	4	LDFSSAEPV	0.96	0	OmpA	0.180889	4.7	NA	0.426202	5.01	WB
234	BoLA-DRB3_00703	PADYEILNRVADKLK	3	YEILNRVAD	0.94	0	OmpA	0.509411	0.17	NA	0.451453	14.73	SB
183	BoLA-DRB3_00703	WPDMKIVNNIEVTGQ	3	MKIVNNIEV	0.92	0	OmpA	0.419656	0.48	NA	0.43247	18.13	SB
212	BoLA-DRB3_00703	QSAINAVTGGPIAFG	3	INAVTGGPI	1	0	OmpA	0.405881	0.55	NA	0.537439	4.53	SB
233	BoLA-DRB3_00703	IPADYEILNRVADKL	4	YEILNRVAD	0.97	0	OmpA	0.399007	0.6	NA	0.392052	26.89	SB
232	BoLA-DRB3_00703	LIPADYEILNRVADK	5	YEILNRVAD	0.96	0	OmpA	0.387413	0.69	NA	0.363045	34.19	SB
138	BoLA-DRB3_00703	AEPVFTASVPIPDFG	4	FTASVPIPD	0.86	0	OmpA	0.364103	0.89	NA	0.431815	18.26	SB
114	BoLA-DRB3_00703	LAPGVNVIDQIHVDP	4	VNVIDQIHV	0.97	0	OmpA	0.357222	0.96	NA	0.333494	42.04	SB
211	BoLA-DRB3_00703	LQSAINAVTGGPIAF	4	INAVTGGPI	1	0	OmpA	0.351361	1.01	NA	0.563709	2.94	WB
115	BoLA-DRB3_00703	APGVNVIDQIHVDPV	3	VNVIDQIHV	0.88	0	OmpA	0.350948	1.02	NA	0.389632	27.5	WB
182	BoLA-DRB3_00703	TWPDMKIVNNIEVTG	4	MKIVNNIEV	0.95	0	OmpA	0.349406	1.03	NA	0.417126	21.25	WB
184	BoLA-DRB3_00703	PDMKIVNNIEVTGQA	2	MKIVNNIEV	0.79	0	OmpA	0.33383	1.2	NA	0.4303	18.55	WB
210	BoLA-DRB3_00703	DLQSAINAVTGGPIA	5	INAVTGGPI	0.99	0	OmpA	0.333441	1.21	NA	0.540941	4.28	WB
139	BoLA-DRB3_00703	EPVFTASVPIPDFGL	3	FTASVPIPD	0.95	0	OmpA	0.321391	1.36	NA	0.453465	14.41	WB
137	BoLA-DRB3_00703	SAEPVFTASVPIPDF	5	FTASVPIPD	0.63	0	OmpA	0.304672	1.61	NA	0.43732	17.24	WB
118	BoLA-DRB3_00703	VNVIDQIHVDPVVRS	3	IDQIHVDPV	0.75	0	OmpA	0.28149	2	NA	0.465704	12.5	WB
235	BoLA-DRB3_00703	ADYEILNRVADKLKA	2	YEILNRVAD	0.85	0	OmpA	0.28064	2.02	NA	0.472725	11.47	WB
116	BoLA-DRB3_00703	PGVNVIDQIHVDPVV	2	VNVIDQIHV	0.6	0	OmpA	0.255683	2.57	NA	0.403827	24.15	WB
113	BoLA-DRB3_00703	LLAPGVNVIDQIHVD	5	VNVIDQIHV	0.95	0	OmpA	0.242125	2.92	NA	0.351472	37.16	WB
280	BoLA-DRB3_00703	IVADYLVARGVAGDH	4	YLVARGVAG	0.71	0	OmpA	0.240856	2.95	NA	0.430229	18.56	WB
117	BoLA-DRB3_00703	GVNVIDQIHVDPVVR	4	IDQIHVDPV	0.87	0	OmpA	0.234623	3.15	NA	0.420114	20.6	WB
136	BoLA-DRB3_00703	SSAEPVFTASVPIPD	4	PVFTASVPI	0.56	0	OmpA	0.23096	3.27	NA	0.390302	27.33	WB
281	BoLA-DRB3_00703	VADYLVARGVAGDHI	3	YLVARGVAG	0.69	0	OmpA	0.218279	3.7	NA	0.432576	18.11	WB
181	BoLA-DRB3_00703	STWPDMKIVNNIEVT	5	MKIVNNIEV	0.98	0	OmpA	0.217057	3.74	NA	0.420263	20.57	WB
270	BoLA-DRB3_00703	NIPLSAQRAKIVADY	3	LSAQRAKIV	0.89	0	OmpA	0.209167	4.03	NA	0.512965	6.66	WB
120	BoLA-DRB3_00703	VIDQIHVDPVVRSLD	4	IHVDPVVRS	0.87	0	OmpA	0.204392	4.23	NA	0.453315	14.44	WB
269	BoLA-DRB3_00703	INIPLSAQRAKIVAD	4	LSAQRAKIV	0.82	0	OmpA	0.20336	4.27	NA	0.517462	6.22	WB
213	BoLA-DRB3_00703	SAINAVTGGPIAFGN	2	INAVTGGPI	0.98	0	OmpA	0.202232	4.32	NA	0.504923	7.48	WB
130	BoLA-DRB3_00703	VRSLDFSSAEPVFTA	3	LDFSSAEPV	0.85	0	OmpA	0.200477	4.39	NA	0.565681	2.84	WB
119	BoLA-DRB3_00703	NVIDQIHVDPVVRSL	2	IDQIHVDPV	0.49	0	OmpA	0.190264	4.91	NA	0.464853	12.62	WB
291	BoLA-DRB3_00703	AGDHIATVGLGSVNP	4	IATVGLGSV	0.85	0	OmpA	0.188919	4.98	NA	0.341048	40	WB
212	BoLA-DRB3_00704	QSAINAVTGGPIAFG	3	INAVTGGPI	1	0	OmpA	0.555019	0.12	NA	0.60699	1.47	SB
210	BoLA-DRB3_00704	DLQSAINAVTGGPIA	5	INAVTGGPI	0.97	0	OmpA	0.532511	0.17	NA	0.615288	1.16	SB
211	BoLA-DRB3_00704	LQSAINAVTGGPIAF	4	INAVTGGPI	1	0	OmpA	0.528193	0.18	NA	0.631686	0.71	SB
115	BoLA-DRB3_00704	APGVNVIDQIHVDPV	3	VNVIDQIHV	0.72	0	OmpA	0.487851	0.29	NA	0.52762	8.15	SB
118	BoLA-DRB3_00704	VNVIDQIHVDPVVRS	3	IDQIHVDPV	0.94	0	OmpA	0.474995	0.34	NA	0.556316	4.81	SB
116	BoLA-DRB3_00704	PGVNVIDQIHVDPVV	5	IDQIHVDPV	0.67	0	OmpA	0.46362	0.37	NA	0.540682	6.45	SB
117	BoLA-DRB3_00704	GVNVIDQIHVDPVVR	4	IDQIHVDPV	0.94	0	OmpA	0.463491	0.37	NA	0.542187	6.28	SB
183	BoLA-DRB3_00704	WPDMKIVNNIEVTGQ	3	MKIVNNIEV	0.96	0	OmpA	0.450685	0.43	NA	0.499323	12.68	SB
114	BoLA-DRB3_00704	LAPGVNVIDQIHVDP	4	VNVIDQIHV	0.99	0	OmpA	0.434962	0.51	NA	0.472573	18.01	SB
182	BoLA-DRB3_00704	TWPDMKIVNNIEVTG	4	MKIVNNIEV	0.98	0	OmpA	0.424108	0.58	NA	0.488797	14.64	SB
209	BoLA-DRB3_00704	ADLQSAINAVTGGPI	6	INAVTGGPI	0.87	0	OmpA	0.383853	0.93	NA	0.605973	1.51	SB
184	BoLA-DRB3_00704	PDMKIVNNIEVTGQA	2	MKIVNNIEV	0.87	0	OmpA	0.363814	1.14	NA	0.487091	14.98	WB
181	BoLA-DRB3_00704	STWPDMKIVNNIEVT	5	MKIVNNIEV	0.99	0	OmpA	0.356032	1.23	NA	0.489497	14.49	WB
113	BoLA-DRB3_00704	LLAPGVNVIDQIHVD	5	VNVIDQIHV	0.97	0	OmpA	0.354155	1.26	NA	0.517049	9.69	WB
213	BoLA-DRB3_00704	SAINAVTGGPIAFGN	2	INAVTGGPI	0.95	0	OmpA	0.345527	1.39	NA	0.581836	2.77	WB
130	BoLA-DRB3_00704	VRSLDFSSAEPVFTA	3	LDFSSAEPV	1	0	OmpA	0.339731	1.47	NA	0.565985	3.94	WB
119	BoLA-DRB3_00704	NVIDQIHVDPVVRSL	2	IDQIHVDPV	0.76	0	OmpA	0.330893	1.61	NA	0.533661	7.35	WB
129	BoLA-DRB3_00704	VVRSLDFSSAEPVFT	4	LDFSSAEPV	0.99	0	OmpA	0.313811	1.88	NA	0.58111	2.82	WB
137	BoLA-DRB3_00704	SAEPVFTASVPIPDF	3	PVFTASVPI	0.58	0	OmpA	0.306877	2.01	NA	0.523057	8.78	WB
136	BoLA-DRB3_00704	SSAEPVFTASVPIPD	4	PVFTASVPI	0.69	0	OmpA	0.29792	2.21	NA	0.494819	13.48	WB
291	BoLA-DRB3_00704	AGDHIATVGLGSVNP	4	IATVGLGSV	0.99	0	OmpA	0.297071	2.22	NA	0.441237	25.19	WB
128	BoLA-DRB3_00704	PVVRSLDFSSAEPVF	5	LDFSSAEPV	0.89	0	OmpA	0.276983	2.7	NA	0.577602	3.05	WB
292	BoLA-DRB3_00704	GDHIATVGLGSVNPI	3	IATVGLGSV	0.95	0	OmpA	0.272525	2.82	NA	0.505765	11.57	WB
29	BoLA-DRB3_00704	RPWLIGAVVIPLLIA	3	LIGAVVIPL	0.77	0	OmpA	0.268497	2.94	NA	0.611862	1.28	WB
138	BoLA-DRB3_00704	AEPVFTASVPIPDFG	4	FTASVPIPD	0.59	0	OmpA	0.261747	3.15	NA	0.508819	11.07	WB
27	BoLA-DRB3_00704	PGRPWLIGAVVIPLL	5	LIGAVVIPL	0.82	0	OmpA	0.260144	3.21	NA	0.630361	0.73	WB
28	BoLA-DRB3_00704	GRPWLIGAVVIPLLI	4	LIGAVVIPL	0.78	0	OmpA	0.248428	3.62	NA	0.60966	1.36	WB
171	BoLA-DRB3_00704	HKDAVKRAATSTWPD	4	VKRAATSTW	1	0	OmpA	0.238447	3.99	NA	0.406229	34.3	WB
88	BoLA-DRB3_00704	GNTVTLIGDFPDEAA	3	VTLIGDFPD	0.92	0	OmpA	0.236441	4.07	NA	0.406359	34.26	WB
290	BoLA-DRB3_00704	VAGDHIATVGLGSVN	5	IATVGLGSV	0.99	0	OmpA	0.22161	4.73	NA	0.44457	24.37	WB
103	BoLA-DRB3_00704	KAALMTALNGLLAPG	3	LMTALNGLL	0.57	0	OmpA	0.219556	4.82	NA	0.58791	2.4	WB
127	BoLA-DRB3_00704	DPVVRSLDFSSAEPV	6	LDFSSAEPV	0.56	0	OmpA	0.218698	4.86	NA	0.56805	3.79	WB
26	BoLA-DRB3_00704	SPGRPWLIGAVVIPL	6	LIGAVVIPL	0.87	0	OmpA	0.218604	4.86	NA	0.624894	0.86	WB
172	BoLA-DRB3_00704	KDAVKRAATSTWPDM	3	VKRAATSTW	0.97	0	OmpA	0.215614	5	NA	0.429414	28.16	WB
212	BoLA-DRB3_00705	QSAINAVTGGPIAFG	3	INAVTGGPI	1	0	OmpA	0.663744	0.02	NA	0.551669	0.16	SB
211	BoLA-DRB3_00705	LQSAINAVTGGPIAF	4	INAVTGGPI	1	0	OmpA	0.623612	0.03	NA	0.554841	0.15	SB
210	BoLA-DRB3_00705	DLQSAINAVTGGPIA	5	INAVTGGPI	1	0	OmpA	0.613193	0.04	NA	0.530098	0.3	SB
213	BoLA-DRB3_00705	SAINAVTGGPIAFGN	2	INAVTGGPI	0.98	0	OmpA	0.461079	0.26	NA	0.523121	0.36	SB
209	BoLA-DRB3_00705	ADLQSAINAVTGGPI	6	INAVTGGPI	0.86	0	OmpA	0.373502	0.67	NA	0.487039	0.93	SB
183	BoLA-DRB3_00705	WPDMKIVNNIEVTGQ	3	MKIVNNIEV	0.94	0	OmpA	0.331714	1.04	NA	0.317747	22.69	WB
118	BoLA-DRB3_00705	VNVIDQIHVDPVVRS	3	IDQIHVDPV	0.88	0	OmpA	0.321607	1.15	NA	0.383523	8.54	WB
115	BoLA-DRB3_00705	APGVNVIDQIHVDPV	3	VNVIDQIHV	0.81	0	OmpA	0.302214	1.4	NA	0.304042	26.86	WB
114	BoLA-DRB3_00705	LAPGVNVIDQIHVDP	4	VNVIDQIHV	0.97	0	OmpA	0.302032	1.4	NA	0.266833	39.89	WB
117	BoLA-DRB3_00705	GVNVIDQIHVDPVVR	4	IDQIHVDPV	0.93	0	OmpA	0.280349	1.8	NA	0.35584	13.46	WB
182	BoLA-DRB3_00705	TWPDMKIVNNIEVTG	4	MKIVNNIEV	0.97	0	OmpA	0.276664	1.87	NA	0.301641	27.65	WB
184	BoLA-DRB3_00705	PDMKIVNNIEVTGQA	2	MKIVNNIEV	0.79	0	OmpA	0.27648	1.87	NA	0.316476	23.06	WB
269	BoLA-DRB3_00705	INIPLSAQRAKIVAD	4	LSAQRAKIV	0.96	0	OmpA	0.273877	1.92	NA	0.435524	3.12	WB
270	BoLA-DRB3_00705	NIPLSAQRAKIVADY	3	LSAQRAKIV	0.98	0	OmpA	0.273758	1.93	NA	0.423033	4.07	WB
116	BoLA-DRB3_00705	PGVNVIDQIHVDPVV	5	IDQIHVDPV	0.56	0	OmpA	0.270561	2	NA	0.326645	20.22	WB
130	BoLA-DRB3_00705	VRSLDFSSAEPVFTA	3	LDFSSAEPV	0.98	0	OmpA	0.258841	2.27	NA	0.442028	2.74	WB
244	BoLA-DRB3_00705	ADKLKACPDARVTIN	3	LKACPDARV	1	0	OmpA	0.236374	2.86	NA	0.37358	10.17	WB
138	BoLA-DRB3_00705	AEPVFTASVPIPDFG	4	FTASVPIPD	0.78	0	OmpA	0.226815	3.18	NA	0.347241	15.24	WB
113	BoLA-DRB3_00705	LLAPGVNVIDQIHVD	5	VNVIDQIHV	0.95	0	OmpA	0.22002	3.42	NA	0.291482	31.1	WB
119	BoLA-DRB3_00705	NVIDQIHVDPVVRSL	2	IDQIHVDPV	0.68	0	OmpA	0.219384	3.44	NA	0.369568	10.85	WB
189	BoLA-DRB3_00705	VNNIEVTGQAPPGPP	3	IEVTGQAPP	0.96	0	OmpA	0.219293	3.45	NA	0.219117	57.84	WB
129	BoLA-DRB3_00705	VVRSLDFSSAEPVFT	4	LDFSSAEPV	0.97	0	OmpA	0.218615	3.47	NA	0.451227	2.26	WB
88	BoLA-DRB3_00705	GNTVTLIGDFPDEAA	3	VTLIGDFPD	0.97	0	OmpA	0.214041	3.65	NA	0.286557	32.82	WB
243	BoLA-DRB3_00705	VADKLKACPDARVTI	4	LKACPDARV	1	0	OmpA	0.209547	3.82	NA	0.38135	8.86	WB
137	BoLA-DRB3_00705	SAEPVFTASVPIPDF	5	FTASVPIPD	0.5	0	OmpA	0.204044	4.05	NA	0.35405	13.82	WB
171	BoLA-DRB3_00705	HKDAVKRAATSTWPD	4	VKRAATSTW	0.96	0	OmpA	0.201291	4.17	NA	0.294224	30.16	WB
300	BoLA-DRB3_00705	LGSVNPIASNATPEG	3	VNPIASNAT	0.94	0	OmpA	0.197204	4.36	NA	0.238765	50.48	WB
127	BoLA-DRB3_00705	DPVVRSLDFSSAEPV	3	VRSLDFSSA	0.4	0	OmpA	0.191891	4.62	NA	0.434111	3.22	WB
214	BoLA-DRB3_00705	AINAVTGGPIAFGND	1	INAVTGGPI	0.68	0	OmpA	0.191655	4.63	NA	0.487076	0.93	WB
126	BoLA-DRB3_00705	VDPVVRSLDFSSAEP	4	VRSLDFSSA	0.53	0	OmpA	0.19125	4.65	NA	0.360264	12.59	WB
181	BoLA-DRB3_00705	STWPDMKIVNNIEVT	5	MKIVNNIEV	0.99	0	OmpA	0.189081	4.77	NA	0.298761	28.61	WB
172	BoLA-DRB3_00705	KDAVKRAATSTWPDM	3	VKRAATSTW	0.95	0	OmpA	0.188233	4.81	NA	0.312673	24.18	WB
291	BoLA-DRB3_00705	AGDHIATVGLGSVNP	4	IATVGLGSV	0.92	0	OmpA	0.187885	4.83	NA	0.274724	36.94	WB
242	BoLA-DRB3_00705	RVADKLKACPDARVT	5	LKACPDARV	0.98	0	OmpA	0.186622	4.9	NA	0.36331	12.02	WB
139	BoLA-DRB3_00705	EPVFTASVPIPDFGL	3	FTASVPIPD	0.86	0	OmpA	0.186284	4.92	NA	0.36438	11.81	WB
136	BoLA-DRB3_00705	SSAEPVFTASVPIPD	4	PVFTASVPI	0.57	0	OmpA	0.185977	4.93	NA	0.318	22.62	WB
128	BoLA-DRB3_00705	PVVRSLDFSSAEPVF	5	LDFSSAEPV	0.83	0	OmpA	0.185168	4.98	NA	0.446435	2.5	WB
212	BoLA-DRB3_00706	QSAINAVTGGPIAFG	3	INAVTGGPI	1	0	OmpA	0.644228	0.06	NA	0.580816	1.67	SB
211	BoLA-DRB3_00706	LQSAINAVTGGPIAF	4	INAVTGGPI	1	0	OmpA	0.591134	0.13	NA	0.60919	0.86	SB
210	BoLA-DRB3_00706	DLQSAINAVTGGPIA	5	INAVTGGPI	0.99	0	OmpA	0.572671	0.15	NA	0.579288	1.72	SB
183	BoLA-DRB3_00706	WPDMKIVNNIEVTGQ	3	MKIVNNIEV	0.98	0	OmpA	0.488866	0.36	NA	0.407303	24.04	SB
115	BoLA-DRB3_00706	APGVNVIDQIHVDPV	3	VNVIDQIHV	0.9	0	OmpA	0.468753	0.45	NA	0.421487	20.75	SB
114	BoLA-DRB3_00706	LAPGVNVIDQIHVDP	4	VNVIDQIHV	1	0	OmpA	0.464851	0.46	NA	0.369039	34.01	SB
182	BoLA-DRB3_00706	TWPDMKIVNNIEVTG	4	MKIVNNIEV	0.99	0	OmpA	0.429808	0.65	NA	0.394576	27.19	SB
184	BoLA-DRB3_00706	PDMKIVNNIEVTGQA	2	MKIVNNIEV	0.9	0	OmpA	0.405262	0.83	NA	0.400612	25.68	SB
213	BoLA-DRB3_00706	SAINAVTGGPIAFGN	2	INAVTGGPI	1	0	OmpA	0.405016	0.83	NA	0.549373	3.18	SB
209	BoLA-DRB3_00706	ADLQSAINAVTGGPI	6	INAVTGGPI	0.87	0	OmpA	0.400387	0.86	NA	0.552024	3	SB
116	BoLA-DRB3_00706	PGVNVIDQIHVDPVV	2	VNVIDQIHV	0.64	0	OmpA	0.337798	1.56	NA	0.431225	18.7	WB
113	BoLA-DRB3_00706	LLAPGVNVIDQIHVD	5	VNVIDQIHV	1	0	OmpA	0.335995	1.59	NA	0.380683	30.83	WB
234	BoLA-DRB3_00706	PADYEILNRVADKLK	3	YEILNRVAD	0.76	0	OmpA	0.331866	1.65	NA	0.475468	10.76	WB
181	BoLA-DRB3_00706	STWPDMKIVNNIEVT	5	MKIVNNIEV	0.99	0	OmpA	0.324352	1.76	NA	0.393506	27.46	WB
118	BoLA-DRB3_00706	VNVIDQIHVDPVVRS	3	IDQIHVDPV	0.87	0	OmpA	0.321201	1.81	NA	0.473524	11.05	WB
270	BoLA-DRB3_00706	NIPLSAQRAKIVADY	3	LSAQRAKIV	0.99	0	OmpA	0.30789	2.06	NA	0.502687	7.26	WB
269	BoLA-DRB3_00706	INIPLSAQRAKIVAD	4	LSAQRAKIV	1	0	OmpA	0.305567	2.11	NA	0.517114	5.69	WB
117	BoLA-DRB3_00706	GVNVIDQIHVDPVVR	4	IDQIHVDPV	0.91	0	OmpA	0.289801	2.42	NA	0.440742	16.73	WB
244	BoLA-DRB3_00706	ADKLKACPDARVTIN	3	LKACPDARV	1	0	OmpA	0.271087	2.85	NA	0.470951	11.45	WB
233	BoLA-DRB3_00706	IPADYEILNRVADKL	4	YEILNRVAD	0.88	0	OmpA	0.242125	3.72	NA	0.406504	24.24	WB
243	BoLA-DRB3_00706	VADKLKACPDARVTI	4	LKACPDARV	1	0	OmpA	0.241802	3.73	NA	0.472557	11.2	WB
232	BoLA-DRB3_00706	LIPADYEILNRVADK	5	YEILNRVAD	0.92	0	OmpA	0.241656	3.74	NA	0.380484	30.88	WB
279	BoLA-DRB3_00706	KIVADYLVARGVAGD	3	ADYLVARGV	0.49	0	OmpA	0.232287	4.09	NA	0.436318	17.62	WB
103	BoLA-DRB3_00706	KAALMTALNGLLAPG	4	MTALNGLLA	0.66	0	OmpA	0.228715	4.24	NA	0.54957	3.17	WB
291	BoLA-DRB3_00706	AGDHIATVGLGSVNP	4	IATVGLGSV	0.95	0	OmpA	0.225003	4.39	NA	0.375657	32.17	WB
119	BoLA-DRB3_00706	NVIDQIHVDPVVRSL	2	IDQIHVDPV	0.61	0	OmpA	0.222327	4.49	NA	0.457711	13.63	WB
235	BoLA-DRB3_00706	ADYEILNRVADKLKA	2	YEILNRVAD	0.56	0	OmpA	0.220395	4.58	NA	0.499966	7.57	WB
242	BoLA-DRB3_00706	RVADKLKACPDARVT	5	LKACPDARV	1	0	OmpA	0.215268	4.81	NA	0.450327	14.99	WB
130	BoLA-DRB3_00706	VRSLDFSSAEPVFTA	3	LDFSSAEPV	0.94	0	OmpA	0.212498	4.93	NA	0.514243	5.99	WB
234	BoLA-DRB3_00801	PADYEILNRVADKLK	3	YEILNRVAD	0.98	0	OmpA	0.729661	0.06	NA	0.598806	8.64	SB
233	BoLA-DRB3_00801	IPADYEILNRVADKL	4	YEILNRVAD	0.99	0	OmpA	0.637585	0.18	NA	0.542141	14.99	SB
232	BoLA-DRB3_00801	LIPADYEILNRVADK	5	YEILNRVAD	1	0	OmpA	0.602465	0.25	NA	0.477688	24.73	SB
235	BoLA-DRB3_00801	ADYEILNRVADKLKA	2	YEILNRVAD	0.89	0	OmpA	0.531334	0.47	NA	0.622136	6.6	SB
282	BoLA-DRB3_00801	ADYLVARGVAGDHIA	3	LVARGVAGD	0.97	0	OmpA	0.287565	2.78	NA	0.512724	19.09	WB
183	BoLA-DRB3_00801	WPDMKIVNNIEVTGQ	3	MKIVNNIEV	0.83	0	OmpA	0.269224	3.14	NA	0.415456	36.6	WB
281	BoLA-DRB3_00801	VADYLVARGVAGDHI	4	LVARGVAGD	0.86	0	OmpA	0.240292	3.85	NA	0.532449	16.29	WB
231	BoLA-DRB3_00801	SLIPADYEILNRVAD	6	YEILNRVAD	0.95	0	OmpA	0.228647	4.2	NA	0.428073	34.02	WB
114	BoLA-DRB3_00801	LAPGVNVIDQIHVDP	4	VNVIDQIHV	0.97	0	OmpA	0.227514	4.24	NA	0.379948	44.13	WB
115	BoLA-DRB3_00801	APGVNVIDQIHVDPV	3	VNVIDQIHV	0.95	0	OmpA	0.21962	4.5	NA	0.400773	39.61	WB
184	BoLA-DRB3_00801	PDMKIVNNIEVTGQA	2	MKIVNNIEV	0.57	0	OmpA	0.218829	4.52	NA	0.414601	36.79	WB
182	BoLA-DRB3_00801	TWPDMKIVNNIEVTG	4	MKIVNNIEV	0.88	0	OmpA	0.206012	4.97	NA	0.397567	40.28	WB
234	BoLA-DRB3_00802	PADYEILNRVADKLK	3	YEILNRVAD	0.97	0	OmpA	0.611801	0.24	NA	0.605169	9.67	SB
233	BoLA-DRB3_00802	IPADYEILNRVADKL	4	YEILNRVAD	0.98	0	OmpA	0.504132	0.64	NA	0.534624	18.22	SB
232	BoLA-DRB3_00802	LIPADYEILNRVADK	5	YEILNRVAD	1	0	OmpA	0.471034	0.81	NA	0.471219	28.55	SB
235	BoLA-DRB3_00802	ADYEILNRVADKLKA	2	YEILNRVAD	0.83	0	OmpA	0.376369	1.54	NA	0.63152	7.26	WB
115	BoLA-DRB3_00802	APGVNVIDQIHVDPV	3	VNVIDQIHV	0.9	0	OmpA	0.202819	4.95	NA	0.411139	40.17	WB
114	BoLA-DRB3_00802	LAPGVNVIDQIHVDP	4	VNVIDQIHV	0.95	0	OmpA	0.202199	4.97	NA	0.388421	44.93	WB
121	BoLA-DRB3_00901	IDQIHVDPVVRSLDF	3	IHVDPVVRS	0.99	0	OmpA	0.309995	1.18	NA	0.262554	2.54	WB
120	BoLA-DRB3_00901	VIDQIHVDPVVRSLD	4	IHVDPVVRS	0.93	0	OmpA	0.305973	1.22	NA	0.267211	2.25	WB
277	BoLA-DRB3_00901	RAKIVADYLVARGVA	3	IVADYLVAR	1	0	OmpA	0.301291	1.28	NA	0.28108	1.56	WB
276	BoLA-DRB3_00901	QRAKIVADYLVARGV	4	IVADYLVAR	0.97	0	OmpA	0.248819	2.15	NA	0.274866	1.83	WB
118	BoLA-DRB3_00901	VNVIDQIHVDPVVRS	3	IDQIHVDPV	0.76	0	OmpA	0.239826	2.35	NA	0.257558	2.86	WB
130	BoLA-DRB3_00901	VRSLDFSSAEPVFTA	3	LDFSSAEPV	0.79	0	OmpA	0.23699	2.41	NA	0.312001	0.69	WB
303	BoLA-DRB3_00901	VNPIASNATPEGRAK	3	IASNATPEG	0.94	0	OmpA	0.23452	2.47	NA	0.14097	31.32	WB
138	BoLA-DRB3_00901	AEPVFTASVPIPDFG	4	FTASVPIPD	0.89	0	OmpA	0.231524	2.55	NA	0.21067	8.44	WB
119	BoLA-DRB3_00901	NVIDQIHVDPVVRSL	5	IHVDPVVRS	0.57	0	OmpA	0.226239	2.69	NA	0.277958	1.69	WB
139	BoLA-DRB3_00901	EPVFTASVPIPDFGL	3	FTASVPIPD	0.99	0	OmpA	0.213064	3.08	NA	0.222023	6.57	WB
234	BoLA-DRB3_00901	PADYEILNRVADKLK	3	YEILNRVAD	0.83	0	OmpA	0.207431	3.26	NA	0.149673	27.2	WB
275	BoLA-DRB3_00901	AQRAKIVADYLVARG	5	IVADYLVAR	0.87	0	OmpA	0.200356	3.49	NA	0.255543	2.98	WB
184	BoLA-DRB3_00901	PDMKIVNNIEVTGQA	4	IVNNIEVTG	0.5	0	OmpA	0.20004	3.5	NA	0.197489	11.11	WB
185	BoLA-DRB3_00901	DMKIVNNIEVTGQAP	3	IVNNIEVTG	0.89	0	OmpA	0.195402	3.69	NA	0.185804	14.02	WB
183	BoLA-DRB3_00901	WPDMKIVNNIEVTGQ	3	MKIVNNIEV	0.63	0	OmpA	0.187218	4.01	NA	0.19743	11.12	WB
117	BoLA-DRB3_00901	GVNVIDQIHVDPVVR	4	IDQIHVDPV	0.91	0	OmpA	0.178192	4.45	NA	0.208071	8.89	WB
122	BoLA-DRB3_00901	DQIHVDPVVRSLDFS	2	IHVDPVVRS	0.96	0	OmpA	0.177622	4.47	NA	0.221062	6.71	WB
129	BoLA-DRB3_00901	VVRSLDFSSAEPVFT	4	LDFSSAEPV	0.99	0	OmpA	0.174391	4.63	NA	0.291399	1.19	WB
281	BoLA-DRB3_00901	VADYLVARGVAGDHI	3	YLVARGVAG	0.98	0	OmpA	0.171705	4.77	NA	0.154384	25.19	WB
280	BoLA-DRB3_00901	IVADYLVARGVAGDH	4	YLVARGVAG	0.97	0	OmpA	0.168849	4.91	NA	0.216184	7.46	WB
234	BoLA-DRB3_00902	PADYEILNRVADKLK	3	YEILNRVAD	0.94	0	OmpA	0.378872	1.13	NA	0.151401	27.74	WB
138	BoLA-DRB3_00902	AEPVFTASVPIPDFG	4	FTASVPIPD	0.93	0	OmpA	0.351904	1.43	NA	0.22437	7.55	WB
139	BoLA-DRB3_00902	EPVFTASVPIPDFGL	3	FTASVPIPD	0.99	0	OmpA	0.335362	1.66	NA	0.231804	6.52	WB
281	BoLA-DRB3_00902	VADYLVARGVAGDHI	3	YLVARGVAG	0.95	0	OmpA	0.27837	2.76	NA	0.187	15.38	WB
233	BoLA-DRB3_00902	IPADYEILNRVADKL	4	YEILNRVAD	0.94	0	OmpA	0.277838	2.77	NA	0.139334	33.23	WB
280	BoLA-DRB3_00902	IVADYLVARGVAGDH	4	YLVARGVAG	0.97	0	OmpA	0.277835	2.77	NA	0.226141	7.28	WB
277	BoLA-DRB3_00902	RAKIVADYLVARGVA	3	IVADYLVAR	0.96	0	OmpA	0.274307	2.86	NA	0.278092	2.38	WB
137	BoLA-DRB3_00902	SAEPVFTASVPIPDF	5	FTASVPIPD	0.74	0	OmpA	0.257817	3.27	NA	0.230497	6.69	WB
183	BoLA-DRB3_00902	WPDMKIVNNIEVTGQ	3	MKIVNNIEV	0.74	0	OmpA	0.256156	3.32	NA	0.22256	7.82	WB
184	BoLA-DRB3_00902	PDMKIVNNIEVTGQA	4	IVNNIEVTG	0.47	0	OmpA	0.245145	3.64	NA	0.219029	8.39	WB
121	BoLA-DRB3_00902	IDQIHVDPVVRSLDF	3	IHVDPVVRS	0.91	0	OmpA	0.243954	3.68	NA	0.246823	4.76	WB
232	BoLA-DRB3_00902	LIPADYEILNRVADK	5	YEILNRVAD	0.89	0	OmpA	0.238927	3.86	NA	0.127999	39.05	WB
120	BoLA-DRB3_00902	VIDQIHVDPVVRSLD	4	IHVDPVVRS	0.9	0	OmpA	0.236672	3.94	NA	0.243639	5.1	WB
276	BoLA-DRB3_00902	QRAKIVADYLVARGV	4	IVADYLVAR	0.9	0	OmpA	0.232272	4.1	NA	0.267288	3.05	WB
235	BoLA-DRB3_00902	ADYEILNRVADKLKA	2	YEILNRVAD	0.73	0	OmpA	0.228374	4.25	NA	0.166993	21.61	WB
185	BoLA-DRB3_00902	DMKIVNNIEVTGQAP	3	IVNNIEVTG	0.85	0	OmpA	0.225821	4.35	NA	0.204597	11.06	WB
130	BoLA-DRB3_00902	VRSLDFSSAEPVFTA	3	LDFSSAEPV	0.86	0	OmpA	0.225556	4.36	NA	0.308587	1.16	WB
303	BoLA-DRB3_00902	VNPIASNATPEGRAK	3	IASNATPEG	0.95	0	OmpA	0.214576	4.81	NA	0.139474	33.16	WB
138	BoLA-DRB3_00903	AEPVFTASVPIPDFG	4	FTASVPIPD	0.94	0	OmpA	0.436323	0.37	NA	0.312967	3.52	SB
139	BoLA-DRB3_00903	EPVFTASVPIPDFGL	3	FTASVPIPD	0.98	0	OmpA	0.415211	0.45	NA	0.325581	2.84	SB
303	BoLA-DRB3_00903	VNPIASNATPEGRAK	3	IASNATPEG	1	0	OmpA	0.391926	0.54	NA	0.211973	17.82	SB
280	BoLA-DRB3_00903	IVADYLVARGVAGDH	4	YLVARGVAG	0.99	0	OmpA	0.385599	0.57	NA	0.281989	5.94	SB
281	BoLA-DRB3_00903	VADYLVARGVAGDHI	3	YLVARGVAG	0.99	0	OmpA	0.382329	0.58	NA	0.273062	6.91	SB
121	BoLA-DRB3_00903	IDQIHVDPVVRSLDF	3	IHVDPVVRS	0.99	0	OmpA	0.376237	0.61	NA	0.310176	3.69	SB
120	BoLA-DRB3_00903	VIDQIHVDPVVRSLD	4	IHVDPVVRS	0.96	0	OmpA	0.362068	0.69	NA	0.304132	4.09	SB
302	BoLA-DRB3_00903	SVNPIASNATPEGRA	4	IASNATPEG	0.96	0	OmpA	0.303512	1.15	NA	0.196745	22.05	WB
137	BoLA-DRB3_00903	SAEPVFTASVPIPDF	5	FTASVPIPD	0.85	0	OmpA	0.290611	1.3	NA	0.309596	3.73	WB
130	BoLA-DRB3_00903	VRSLDFSSAEPVFTA	3	LDFSSAEPV	0.83	0	OmpA	0.270633	1.53	NA	0.388014	0.88	WB
279	BoLA-DRB3_00903	KIVADYLVARGVAGD	5	YLVARGVAG	0.95	0	OmpA	0.258439	1.7	NA	0.279472	6.2	WB
304	BoLA-DRB3_00903	NPIASNATPEGRAKN	2	IASNATPEG	0.98	0	OmpA	0.256776	1.72	NA	0.183688	26.39	WB
122	BoLA-DRB3_00903	DQIHVDPVVRSLDFS	2	IHVDPVVRS	0.96	0	OmpA	0.234371	2.12	NA	0.267999	7.51	WB
282	BoLA-DRB3_00903	ADYLVARGVAGDHIA	2	YLVARGVAG	0.93	0	OmpA	0.232727	2.15	NA	0.25766	8.92	WB
119	BoLA-DRB3_00903	NVIDQIHVDPVVRSL	5	IHVDPVVRS	0.83	0	OmpA	0.229539	2.22	NA	0.309596	3.73	WB
184	BoLA-DRB3_00903	PDMKIVNNIEVTGQA	4	IVNNIEVTG	0.54	0	OmpA	0.222775	2.35	NA	0.234358	12.82	WB
183	BoLA-DRB3_00903	WPDMKIVNNIEVTGQ	3	MKIVNNIEV	0.61	0	OmpA	0.219277	2.42	NA	0.228998	13.91	WB
185	BoLA-DRB3_00903	DMKIVNNIEVTGQAP	3	IVNNIEVTG	0.92	0	OmpA	0.217275	2.46	NA	0.220418	15.78	WB
131	BoLA-DRB3_00903	RSLDFSSAEPVFTAS	4	FSSAEPVFT	0.58	0	OmpA	0.213225	2.56	NA	0.378999	1.07	WB
301	BoLA-DRB3_00903	GSVNPIASNATPEGR	5	IASNATPEG	0.86	0	OmpA	0.206545	2.72	NA	0.177448	28.61	WB
132	BoLA-DRB3_00903	SLDFSSAEPVFTASV	3	FSSAEPVFT	0.91	0	OmpA	0.199487	2.9	NA	0.360712	1.49	WB
140	BoLA-DRB3_00903	PVFTASVPIPDFGLK	2	FTASVPIPD	0.98	0	OmpA	0.1802	3.46	NA	0.28309	5.83	WB
129	BoLA-DRB3_00903	VVRSLDFSSAEPVFT	4	LDFSSAEPV	0.95	0	OmpA	0.177553	3.55	NA	0.345888	1.97	WB
118	BoLA-DRB3_00903	VNVIDQIHVDPVVRS	3	IDQIHVDPV	0.53	0	OmpA	0.153484	4.49	NA	0.271395	7.11	WB
222	BoLA-DRB3_00903	PIAFGNDGASLIPAD	3	FGNDGASLI	0.97	0	OmpA	0.149584	4.66	NA	0.235565	12.59	WB
280	BoLA-DRB3_00904	IVADYLVARGVAGDH	4	YLVARGVAG	0.97	0	OmpA	0.494527	0.27	NA	0.347365	4.68	SB
281	BoLA-DRB3_00904	VADYLVARGVAGDHI	3	YLVARGVAG	0.95	0	OmpA	0.469922	0.36	NA	0.345441	4.82	SB
138	BoLA-DRB3_00904	AEPVFTASVPIPDFG	4	FTASVPIPD	0.91	0	OmpA	0.4426	0.49	NA	0.303578	9.26	SB
234	BoLA-DRB3_00904	PADYEILNRVADKLK	3	YEILNRVAD	0.93	0	OmpA	0.419612	0.65	NA	0.234225	23.25	SB
139	BoLA-DRB3_00904	EPVFTASVPIPDFGL	3	FTASVPIPD	0.97	0	OmpA	0.418566	0.65	NA	0.324996	6.67	SB
279	BoLA-DRB3_00904	KIVADYLVARGVAGD	5	YLVARGVAG	0.95	0	OmpA	0.377574	0.98	NA	0.338962	5.33	SB
137	BoLA-DRB3_00904	SAEPVFTASVPIPDF	5	FTASVPIPD	0.83	0	OmpA	0.324017	1.54	NA	0.297802	10.08	WB
282	BoLA-DRB3_00904	ADYLVARGVAGDHIA	2	YLVARGVAG	0.86	0	OmpA	0.322887	1.56	NA	0.334251	5.75	WB
233	BoLA-DRB3_00904	IPADYEILNRVADKL	4	YEILNRVAD	0.98	0	OmpA	0.319876	1.6	NA	0.207074	31.61	WB
232	BoLA-DRB3_00904	LIPADYEILNRVADK	5	YEILNRVAD	0.98	0	OmpA	0.288378	2.15	NA	0.177392	42.66	WB
235	BoLA-DRB3_00904	ADYEILNRVADKLKA	2	YEILNRVAD	0.84	0	OmpA	0.244477	3.23	NA	0.257233	17.5	WB
140	BoLA-DRB3_00904	PVFTASVPIPDFGLK	2	FTASVPIPD	0.99	0	OmpA	0.231302	3.66	NA	0.309061	8.52	WB
183	BoLA-DRB3_00904	WPDMKIVNNIEVTGQ	3	MKIVNNIEV	0.66	0	OmpA	0.203308	4.77	NA	0.199084	34.43	WB
121	BoLA-DRB3_00904	IDQIHVDPVVRSLDF	3	IHVDPVVRS	0.93	0	OmpA	0.20148	4.85	NA	0.218817	27.74	WB
130	BoLA-DRB3_00904	VRSLDFSSAEPVFTA	3	LDFSSAEPV	0.63	0	OmpA	0.201437	4.85	NA	0.345701	4.8	WB
234	BoLA-DRB3_01001	PADYEILNRVADKLK	3	YEILNRVAD	1	0	OmpA	0.793994	0.42	NA	0.479607	22.6	SB
233	BoLA-DRB3_01001	IPADYEILNRVADKL	4	YEILNRVAD	1	0	OmpA	0.717062	0.62	NA	0.466071	25.3	SB
232	BoLA-DRB3_01001	LIPADYEILNRVADK	5	YEILNRVAD	1	0	OmpA	0.711626	0.64	NA	0.435388	31.81	SB
44	BoLA-DRB3_01001	AIGYGAFERPQSVTG	3	YGAFERPQS	1	0	OmpA	0.675596	0.75	NA	0.502198	18.41	SB
43	BoLA-DRB3_01001	AAIGYGAFERPQSVT	4	YGAFERPQS	1	0	OmpA	0.626302	0.91	NA	0.517941	15.73	SB
42	BoLA-DRB3_01001	IAAIGYGAFERPQSV	5	YGAFERPQS	1	0	OmpA	0.563166	1.14	NA	0.577271	7.81	WB
235	BoLA-DRB3_01001	ADYEILNRVADKLKA	2	YEILNRVAD	0.94	0	OmpA	0.514724	1.36	NA	0.486508	21.3	WB
45	BoLA-DRB3_01001	IGYGAFERPQSVTGP	2	YGAFERPQS	1	0	OmpA	0.359862	2.36	NA	0.473288	23.86	WB
41	BoLA-DRB3_01001	LIAAIGYGAFERPQS	6	YGAFERPQS	1	0	OmpA	0.354979	2.4	NA	0.587811	6.75	WB
231	BoLA-DRB3_01001	SLIPADYEILNRVAD	6	YEILNRVAD	0.99	0	OmpA	0.339524	2.54	NA	0.426908	33.72	WB
114	BoLA-DRB3_01001	LAPGVNVIDQIHVDP	4	VNVIDQIHV	0.99	0	OmpA	0.20078	4.45	NA	0.368231	47.66	WB
115	BoLA-DRB3_01001	APGVNVIDQIHVDPV	3	VNVIDQIHV	0.99	0	OmpA	0.186808	4.76	NA	0.386124	43.33	WB
183	BoLA-DRB3_01002	WPDMKIVNNIEVTGQ	3	MKIVNNIEV	0.99	0	OmpA	0.207715	1.61	NA	0.420563	26.7	WB
182	BoLA-DRB3_01002	TWPDMKIVNNIEVTG	4	MKIVNNIEV	1	0	OmpA	0.171501	2.14	NA	0.41016	29.06	WB
254	BoLA-DRB3_01002	RVTINGYTDNTGSEG	3	INGYTDNTG	0.99	0	OmpA	0.157677	2.4	NA	0.26806	65.89	WB
184	BoLA-DRB3_01002	PDMKIVNNIEVTGQA	2	MKIVNNIEV	0.95	0	OmpA	0.128171	3.04	NA	0.402394	30.88	WB
253	BoLA-DRB3_01002	ARVTINGYTDNTGSE	4	INGYTDNTG	1	0	OmpA	0.126465	3.09	NA	0.284846	61.34	WB
280	BoLA-DRB3_01002	IVADYLVARGVAGDH	4	YLVARGVAG	0.99	0	OmpA	0.109477	3.64	NA	0.50022	12.26	WB
181	BoLA-DRB3_01002	STWPDMKIVNNIEVT	5	MKIVNNIEV	1	0	OmpA	0.101625	3.93	NA	0.408354	29.47	WB
281	BoLA-DRB3_01002	VADYLVARGVAGDHI	3	YLVARGVAG	0.97	0	OmpA	0.095759	4.18	NA	0.499876	12.31	WB
91	BoLA-DRB3_01002	VTLIGDFPDEAAKAA	3	IGDFPDEAA	0.99	0	OmpA	0.093368	4.29	NA	0.330132	49.25	WB
234	BoLA-DRB3_01002	PADYEILNRVADKLK	3	YEILNRVAD	0.85	0	OmpA	0.084204	4.73	NA	0.385776	34.8	WB
183	BoLA-DRB3_01003	WPDMKIVNNIEVTGQ	3	MKIVNNIEV	1	0	OmpA	0.266805	1.15	NA	0.456496	23.32	WB
182	BoLA-DRB3_01003	TWPDMKIVNNIEVTG	4	MKIVNNIEV	1	0	OmpA	0.220627	1.57	NA	0.445922	25.61	WB
184	BoLA-DRB3_01003	PDMKIVNNIEVTGQA	2	MKIVNNIEV	0.97	0	OmpA	0.171528	2.31	NA	0.43969	26.97	WB
280	BoLA-DRB3_01003	IVADYLVARGVAGDH	4	YLVARGVAG	0.98	0	OmpA	0.154758	2.66	NA	0.526934	11.08	WB
254	BoLA-DRB3_01003	RVTINGYTDNTGSEG	3	INGYTDNTG	0.98	0	OmpA	0.152439	2.71	NA	0.285154	66.19	WB
181	BoLA-DRB3_01003	STWPDMKIVNNIEVT	5	MKIVNNIEV	1	0	OmpA	0.140584	3	NA	0.446535	25.48	WB
281	BoLA-DRB3_01003	VADYLVARGVAGDHI	3	YLVARGVAG	0.97	0	OmpA	0.134933	3.16	NA	0.525686	11.27	WB
253	BoLA-DRB3_01003	ARVTINGYTDNTGSE	4	INGYTDNTG	1	0	OmpA	0.12635	3.4	NA	0.304422	61.1	WB
91	BoLA-DRB3_01003	VTLIGDFPDEAAKAA	3	IGDFPDEAA	0.98	0	OmpA	0.097403	4.56	NA	0.345902	50.19	WB
279	BoLA-DRB3_01003	KIVADYLVARGVAGD	5	YLVARGVAG	0.91	0	OmpA	0.094951	4.67	NA	0.54412	8.87	WB
234	BoLA-DRB3_01004	PADYEILNRVADKLK	3	YEILNRVAD	0.98	0	OmpA	0.63058	0.44	NA	0.385227	28.58	SB
233	BoLA-DRB3_01004	IPADYEILNRVADKL	4	YEILNRVAD	1	0	OmpA	0.549047	0.68	NA	0.371026	31.88	SB
232	BoLA-DRB3_01004	LIPADYEILNRVADK	5	YEILNRVAD	1	0	OmpA	0.54513	0.69	NA	0.348533	37.22	SB
235	BoLA-DRB3_01004	ADYEILNRVADKLKA	2	YEILNRVAD	0.92	0	OmpA	0.359149	1.63	NA	0.400409	25.4	WB
44	BoLA-DRB3_01004	AIGYGAFERPQSVTG	3	YGAFERPQS	1	0	OmpA	0.342421	1.76	NA	0.335711	40.33	WB
43	BoLA-DRB3_01004	AAIGYGAFERPQSVT	4	YGAFERPQS	1	0	OmpA	0.298891	2.22	NA	0.34575	37.88	WB
42	BoLA-DRB3_01004	IAAIGYGAFERPQSV	5	YGAFERPQS	1	0	OmpA	0.255025	2.8	NA	0.413233	22.84	WB
231	BoLA-DRB3_01004	SLIPADYEILNRVAD	6	YEILNRVAD	0.99	0	OmpA	0.250766	2.87	NA	0.354998	35.68	WB
183	BoLA-DRB3_01005	WPDMKIVNNIEVTGQ	3	MKIVNNIEV	1	0	OmpA	0.218274	1.79	NA	0.438307	28.38	WB
182	BoLA-DRB3_01005	TWPDMKIVNNIEVTG	4	MKIVNNIEV	1	0	OmpA	0.179155	2.38	NA	0.432221	29.71	WB
234	BoLA-DRB3_01005	PADYEILNRVADKLK	3	YEILNRVAD	0.93	0	OmpA	0.144176	3.12	NA	0.427453	30.77	WB
254	BoLA-DRB3_01005	RVTINGYTDNTGSEG	3	INGYTDNTG	0.97	0	OmpA	0.129318	3.55	NA	0.247343	73.74	WB
184	BoLA-DRB3_01005	PDMKIVNNIEVTGQA	2	MKIVNNIEV	0.95	0	OmpA	0.128335	3.58	NA	0.423995	31.54	WB
253	BoLA-DRB3_01005	ARVTINGYTDNTGSE	4	INGYTDNTG	1	0	OmpA	0.103263	4.49	NA	0.271998	67.98	WB
280	BoLA-DRB3_01005	IVADYLVARGVAGDH	4	YLVARGVAG	0.96	0	OmpA	0.102334	4.54	NA	0.509495	15.31	WB
181	BoLA-DRB3_01005	STWPDMKIVNNIEVT	5	MKIVNNIEV	1	0	OmpA	0.099987	4.65	NA	0.439219	28.19	WB
20	BoLA-DRB3_01005	QKFYRGSPGRPWLIG	3	YRGSPGRPW	1	0	OmpA	0.097877	4.76	NA	0.627403	3.03	WB
88	BoLA-DRB3_01101	GNTVTLIGDFPDEAA	3	VTLIGDFPD	1	0	OmpA	0.740896	0.53	NA	0.394266	11.04	SB
87	BoLA-DRB3_01101	SGNTVTLIGDFPDEA	4	VTLIGDFPD	1	0	OmpA	0.704022	0.66	NA	0.385068	12.62	SB
86	BoLA-DRB3_01101	RSGNTVTLIGDFPDE	5	VTLIGDFPD	1	0	OmpA	0.584321	1.16	NA	0.370223	15.43	WB
89	BoLA-DRB3_01101	NTVTLIGDFPDEAAK	2	VTLIGDFPD	0.96	0	OmpA	0.464597	1.85	NA	0.385092	12.61	WB
138	BoLA-DRB3_01101	AEPVFTASVPIPDFG	4	FTASVPIPD	0.89	0	OmpA	0.444073	2	NA	0.361861	17.18	WB
139	BoLA-DRB3_01101	EPVFTASVPIPDFGL	3	FTASVPIPD	0.96	0	OmpA	0.376769	2.58	NA	0.376428	14.22	WB
118	BoLA-DRB3_01101	VNVIDQIHVDPVVRS	3	IDQIHVDPV	0.8	0	OmpA	0.352966	2.83	NA	0.385878	12.47	WB
234	BoLA-DRB3_01101	PADYEILNRVADKLK	3	YEILNRVAD	0.99	0	OmpA	0.342186	2.95	NA	0.330579	24.86	WB
115	BoLA-DRB3_01101	APGVNVIDQIHVDPV	3	VNVIDQIHV	0.68	0	OmpA	0.33437	3.04	NA	0.354859	18.76	WB
137	BoLA-DRB3_01101	SAEPVFTASVPIPDF	5	FTASVPIPD	0.83	0	OmpA	0.322485	3.19	NA	0.37207	15.07	WB
117	BoLA-DRB3_01101	GVNVIDQIHVDPVVR	4	IDQIHVDPV	0.92	0	OmpA	0.31741	3.25	NA	0.367786	15.92	WB
114	BoLA-DRB3_01101	LAPGVNVIDQIHVDP	4	VNVIDQIHV	0.87	0	OmpA	0.302731	3.44	NA	0.326815	25.87	WB
116	BoLA-DRB3_01101	PGVNVIDQIHVDPVV	5	IDQIHVDPV	0.55	0	OmpA	0.294075	3.56	NA	0.361677	17.23	WB
233	BoLA-DRB3_01101	IPADYEILNRVADKL	4	YEILNRVAD	0.97	0	OmpA	0.25457	4.17	NA	0.316745	28.76	WB
120	BoLA-DRB3_01101	VIDQIHVDPVVRSLD	4	IHVDPVVRS	0.91	0	OmpA	0.244502	4.38	NA	0.375138	14.47	WB
232	BoLA-DRB3_01101	LIPADYEILNRVADK	5	YEILNRVAD	0.91	0	OmpA	0.2365	4.55	NA	0.310846	30.45	WB
85	BoLA-DRB3_01101	SRSGNTVTLIGDFPD	6	VTLIGDFPD	0.69	0	OmpA	0.235107	4.58	NA	0.342908	21.68	WB
119	BoLA-DRB3_01101	NVIDQIHVDPVVRSL	2	IDQIHVDPV	0.56	0	OmpA	0.233066	4.63	NA	0.365686	16.36	WB
88	BoLA-DRB3_01102	GNTVTLIGDFPDEAA	3	VTLIGDFPD	0.99	0	OmpA	0.552782	0.39	NA	0.354456	10.79	SB
138	BoLA-DRB3_01102	AEPVFTASVPIPDFG	4	FTASVPIPD	0.89	0	OmpA	0.547802	0.4	NA	0.363013	9.23	SB
87	BoLA-DRB3_01102	SGNTVTLIGDFPDEA	4	VTLIGDFPD	1	0	OmpA	0.495479	0.56	NA	0.326147	17.11	SB
139	BoLA-DRB3_01102	EPVFTASVPIPDFGL	3	FTASVPIPD	0.98	0	OmpA	0.479376	0.62	NA	0.382545	6.26	SB
137	BoLA-DRB3_01102	SAEPVFTASVPIPDF	5	FTASVPIPD	0.82	0	OmpA	0.405912	0.96	NA	0.367579	8.49	SB
86	BoLA-DRB3_01102	RSGNTVTLIGDFPDE	5	VTLIGDFPD	0.98	0	OmpA	0.36068	1.22	NA	0.311128	21.17	WB
120	BoLA-DRB3_01102	VIDQIHVDPVVRSLD	4	IHVDPVVRS	0.97	0	OmpA	0.360318	1.22	NA	0.362339	9.34	WB
118	BoLA-DRB3_01102	VNVIDQIHVDPVVRS	3	IDQIHVDPV	0.68	0	OmpA	0.329708	1.44	NA	0.360085	9.73	WB
121	BoLA-DRB3_01102	IDQIHVDPVVRSLDF	3	IHVDPVVRS	0.99	0	OmpA	0.328137	1.46	NA	0.355136	10.66	WB
119	BoLA-DRB3_01102	NVIDQIHVDPVVRSL	5	IHVDPVVRS	0.64	0	OmpA	0.276733	1.96	NA	0.3589	9.95	WB
89	BoLA-DRB3_01102	NTVTLIGDFPDEAAK	2	VTLIGDFPD	0.9	0	OmpA	0.265791	2.1	NA	0.357414	10.23	WB
117	BoLA-DRB3_01102	GVNVIDQIHVDPVVR	4	IDQIHVDPV	0.93	0	OmpA	0.258226	2.2	NA	0.328121	16.59	WB
4	BoLA-DRB3_01102	KAGLGQTPATTDARR	3	LGQTPATTD	1	0	OmpA	0.214775	2.9	NA	0.226738	51.02	WB
116	BoLA-DRB3_01102	PGVNVIDQIHVDPVV	5	IDQIHVDPV	0.65	0	OmpA	0.211187	2.96	NA	0.317444	19.43	WB
136	BoLA-DRB3_01102	SSAEPVFTASVPIPD	6	FTASVPIPD	0.74	0	OmpA	0.211154	2.96	NA	0.315487	19.95	WB
115	BoLA-DRB3_01102	APGVNVIDQIHVDPV	3	VNVIDQIHV	0.48	0	OmpA	0.195239	3.31	NA	0.304102	23.19	WB
234	BoLA-DRB3_01102	PADYEILNRVADKLK	3	YEILNRVAD	0.96	0	OmpA	0.192549	3.37	NA	0.326275	17.08	WB
183	BoLA-DRB3_01102	WPDMKIVNNIEVTGQ	3	MKIVNNIEV	0.82	0	OmpA	0.185956	3.52	NA	0.274579	32.82	WB
140	BoLA-DRB3_01102	PVFTASVPIPDFGLK	2	FTASVPIPD	0.94	0	OmpA	0.18164	3.63	NA	0.373584	7.52	WB
111	BoLA-DRB3_01102	NGLLAPGVNVIDQIH	3	LAPGVNVID	0.98	0	OmpA	0.174329	3.82	NA	0.334875	14.9	WB
3	BoLA-DRB3_01102	SKAGLGQTPATTDAR	4	LGQTPATTD	1	0	OmpA	0.160116	4.24	NA	0.215116	55.6	WB
114	BoLA-DRB3_01102	LAPGVNVIDQIHVDP	4	VNVIDQIHV	0.77	0	OmpA	0.150903	4.55	NA	0.287218	28.61	WB
122	BoLA-DRB3_01102	DQIHVDPVVRSLDFS	2	IHVDPVVRS	0.96	0	OmpA	0.144475	4.8	NA	0.313508	20.51	WB
185	BoLA-DRB3_01102	DMKIVNNIEVTGQAP	3	IVNNIEVTG	0.62	0	OmpA	0.14442	4.8	NA	0.274007	33.02	WB
303	BoLA-DRB3_01102	VNPIASNATPEGRAK	3	IASNATPEG	0.97	0	OmpA	0.140567	4.95	NA	0.159779	75.94	WB
120	BoLA-DRB3_01103	VIDQIHVDPVVRSLD	4	IHVDPVVRS	1	0	OmpA	0.537829	0.07	NA	0.409916	11.51	SB
121	BoLA-DRB3_01103	IDQIHVDPVVRSLDF	3	IHVDPVVRS	1	0	OmpA	0.532116	0.07	NA	0.410693	11.38	SB
119	BoLA-DRB3_01103	NVIDQIHVDPVVRSL	5	IHVDPVVRS	0.76	0	OmpA	0.41708	0.29	NA	0.418085	10.13	SB
118	BoLA-DRB3_01103	VNVIDQIHVDPVVRS	3	IDQIHVDPV	0.68	0	OmpA	0.410579	0.31	NA	0.406678	12.06	SB
122	BoLA-DRB3_01103	DQIHVDPVVRSLDFS	2	IHVDPVVRS	1	0	OmpA	0.354048	0.58	NA	0.380013	17.2	SB
59	BoLA-DRB3_01103	PTGVLPTLTPTSTRG	3	VLPTLTPTS	1	0	OmpA	0.339696	0.67	NA	0.444347	6.54	SB
138	BoLA-DRB3_01103	AEPVFTASVPIPDFG	4	FTASVPIPD	0.71	0	OmpA	0.332475	0.72	NA	0.38074	17.04	SB
303	BoLA-DRB3_01103	VNPIASNATPEGRAK	3	IASNATPEG	1	0	OmpA	0.329064	0.76	NA	0.232341	60.53	SB
183	BoLA-DRB3_01103	WPDMKIVNNIEVTGQ	3	MKIVNNIEV	0.79	0	OmpA	0.304373	1	NA	0.34101	26.66	SB
184	BoLA-DRB3_01103	PDMKIVNNIEVTGQA	2	MKIVNNIEV	0.49	0	OmpA	0.281529	1.26	NA	0.353054	23.59	WB
185	BoLA-DRB3_01103	DMKIVNNIEVTGQAP	3	IVNNIEVTG	0.71	0	OmpA	0.276627	1.32	NA	0.351462	23.99	WB
117	BoLA-DRB3_01103	GVNVIDQIHVDPVVR	4	IDQIHVDPV	0.98	0	OmpA	0.276568	1.32	NA	0.343096	26.11	WB
58	BoLA-DRB3_01103	GPTGVLPTLTPTSTR	4	VLPTLTPTS	1	0	OmpA	0.273804	1.35	NA	0.446236	6.31	WB
302	BoLA-DRB3_01103	SVNPIASNATPEGRA	4	IASNATPEG	0.99	0	OmpA	0.265944	1.45	NA	0.235173	59.62	WB
139	BoLA-DRB3_01103	EPVFTASVPIPDFGL	3	FTASVPIPD	0.82	0	OmpA	0.251009	1.67	NA	0.397682	13.71	WB
157	BoLA-DRB3_01103	RDTVTLTGTAPSSEH	3	VTLTGTAPS	0.98	0	OmpA	0.236403	1.92	NA	0.390511	15.06	WB
137	BoLA-DRB3_01103	SAEPVFTASVPIPDF	5	FTASVPIPD	0.63	0	OmpA	0.232063	2.02	NA	0.377112	17.86	WB
186	BoLA-DRB3_01103	MKIVNNIEVTGQAPP	3	VNNIEVTGQ	0.67	0	OmpA	0.227896	2.11	NA	0.338386	27.37	WB
182	BoLA-DRB3_01103	TWPDMKIVNNIEVTG	4	MKIVNNIEV	0.92	0	OmpA	0.221687	2.26	NA	0.32769	30.34	WB
301	BoLA-DRB3_01103	GSVNPIASNATPEGR	5	IASNATPEG	0.79	0	OmpA	0.21709	2.36	NA	0.233612	60.12	WB
304	BoLA-DRB3_01103	NPIASNATPEGRAKN	2	IASNATPEG	1	0	OmpA	0.209556	2.55	NA	0.195794	71.77	WB
76	BoLA-DRB3_01103	ALSLSLLSISRSGNT	3	LSLLSISRS	0.98	0	OmpA	0.206961	2.62	NA	0.61428	0.06	WB
287	BoLA-DRB3_01103	ARGVAGDHIATVGLG	3	VAGDHIATV	0.99	0	OmpA	0.203579	2.72	NA	0.228651	61.71	WB
156	BoLA-DRB3_01103	ERDTVTLTGTAPSSE	4	VTLTGTAPS	1	0	OmpA	0.182913	3.34	NA	0.372066	19	WB
75	BoLA-DRB3_01103	SALSLSLLSISRSGN	4	LSLLSISRS	0.91	0	OmpA	0.17471	3.63	NA	0.621026	0.04	WB
126	BoLA-DRB3_01103	VDPVVRSLDFSSAEP	3	VVRSLDFSS	0.72	0	OmpA	0.172889	3.7	NA	0.428444	8.54	WB
116	BoLA-DRB3_01103	PGVNVIDQIHVDPVV	5	IDQIHVDPV	0.69	0	OmpA	0.169626	3.83	NA	0.320464	32.46	WB
115	BoLA-DRB3_01103	APGVNVIDQIHVDPV	3	VNVIDQIHV	0.8	0	OmpA	0.162514	4.11	NA	0.298873	39	WB
88	BoLA-DRB3_01103	GNTVTLIGDFPDEAA	3	VTLIGDFPD	0.89	0	OmpA	0.151544	4.62	NA	0.295029	40.23	WB
286	BoLA-DRB3_01103	VARGVAGDHIATVGL	4	VAGDHIATV	0.99	0	OmpA	0.150504	4.67	NA	0.246104	56.09	WB
114	BoLA-DRB3_01103	LAPGVNVIDQIHVDP	4	VNVIDQIHV	0.92	0	OmpA	0.149176	4.74	NA	0.280026	44.98	WB
120	BoLA-DRB3_01104	VIDQIHVDPVVRSLD	4	IHVDPVVRS	0.98	0	OmpA	0.663019	0.04	NA	0.425856	5.82	SB
121	BoLA-DRB3_01104	IDQIHVDPVVRSLDF	3	IHVDPVVRS	1	0	OmpA	0.654002	0.05	NA	0.429326	5.44	SB
119	BoLA-DRB3_01104	NVIDQIHVDPVVRSL	5	IHVDPVVRS	0.77	0	OmpA	0.540521	0.21	NA	0.43957	4.47	SB
118	BoLA-DRB3_01104	VNVIDQIHVDPVVRS	3	IDQIHVDPV	0.71	0	OmpA	0.535722	0.23	NA	0.422438	6.21	SB
122	BoLA-DRB3_01104	DQIHVDPVVRSLDFS	2	IHVDPVVRS	1	0	OmpA	0.479942	0.41	NA	0.389318	11.04	SB
185	BoLA-DRB3_01104	DMKIVNNIEVTGQAP	3	IVNNIEVTG	0.72	0	OmpA	0.397317	0.92	NA	0.327076	25.05	SB
115	BoLA-DRB3_01104	APGVNVIDQIHVDPV	3	VNVIDQIHV	0.91	0	OmpA	0.395878	0.93	NA	0.32729	24.99	SB
117	BoLA-DRB3_01104	GVNVIDQIHVDPVVR	4	IDQIHVDPV	0.99	0	OmpA	0.393706	0.95	NA	0.358639	17.15	SB
114	BoLA-DRB3_01104	LAPGVNVIDQIHVDP	4	VNVIDQIHV	0.96	0	OmpA	0.383327	1.06	NA	0.291997	35.63	WB
184	BoLA-DRB3_01104	PDMKIVNNIEVTGQA	4	IVNNIEVTG	0.55	0	OmpA	0.36847	1.21	NA	0.327767	24.87	WB
183	BoLA-DRB3_01104	WPDMKIVNNIEVTGQ	3	MKIVNNIEV	0.72	0	OmpA	0.359528	1.3	NA	0.322208	26.48	WB
303	BoLA-DRB3_01104	VNPIASNATPEGRAK	3	IASNATPEG	1	0	OmpA	0.338715	1.58	NA	0.202143	66.19	WB
277	BoLA-DRB3_01104	RAKIVADYLVARGVA	3	IVADYLVAR	0.89	0	OmpA	0.326269	1.76	NA	0.418999	6.61	WB
59	BoLA-DRB3_01104	PTGVLPTLTPTSTRG	3	VLPTLTPTS	0.99	0	OmpA	0.309715	2.04	NA	0.365738	15.62	WB
116	BoLA-DRB3_01104	PGVNVIDQIHVDPVV	5	IDQIHVDPV	0.5	0	OmpA	0.306614	2.1	NA	0.344561	20.44	WB
186	BoLA-DRB3_01104	MKIVNNIEVTGQAPP	3	VNNIEVTGQ	0.62	0	OmpA	0.297953	2.26	NA	0.321944	26.55	WB
138	BoLA-DRB3_01104	AEPVFTASVPIPDFG	4	FTASVPIPD	0.65	0	OmpA	0.289624	2.41	NA	0.329032	24.53	WB
276	BoLA-DRB3_01104	QRAKIVADYLVARGV	4	IVADYLVAR	0.84	0	OmpA	0.276896	2.68	NA	0.420517	6.43	WB
76	BoLA-DRB3_01104	ALSLSLLSISRSGNT	3	LSLLSISRS	0.98	0	OmpA	0.262591	3.02	NA	0.591901	0.05	WB
302	BoLA-DRB3_01104	SVNPIASNATPEGRA	4	IASNATPEG	0.97	0	OmpA	0.26168	3.04	NA	0.203127	65.87	WB
182	BoLA-DRB3_01104	TWPDMKIVNNIEVTG	4	MKIVNNIEV	0.92	0	OmpA	0.259902	3.09	NA	0.304627	31.65	WB
58	BoLA-DRB3_01104	GPTGVLPTLTPTSTR	4	VLPTLTPTS	0.99	0	OmpA	0.257909	3.14	NA	0.372114	14.3	WB
291	BoLA-DRB3_01104	AGDHIATVGLGSVNP	4	IATVGLGSV	0.92	0	OmpA	0.255664	3.2	NA	0.303786	31.91	WB
275	BoLA-DRB3_01104	AQRAKIVADYLVARG	5	IVADYLVAR	0.71	0	OmpA	0.254418	3.23	NA	0.408426	8.05	WB
292	BoLA-DRB3_01104	GDHIATVGLGSVNPI	3	IATVGLGSV	0.98	0	OmpA	0.245854	3.45	NA	0.319936	27.14	WB
287	BoLA-DRB3_01104	ARGVAGDHIATVGLG	3	VAGDHIATV	0.99	0	OmpA	0.238665	3.66	NA	0.218729	60.64	WB
75	BoLA-DRB3_01104	SALSLSLLSISRSGN	4	LSLLSISRS	0.89	0	OmpA	0.227524	3.99	NA	0.599841	0.03	WB
126	BoLA-DRB3_01104	VDPVVRSLDFSSAEP	3	VVRSLDFSS	0.51	0	OmpA	0.220275	4.24	NA	0.416687	6.89	WB
113	BoLA-DRB3_01104	LLAPGVNVIDQIHVD	5	VNVIDQIHV	0.95	0	OmpA	0.2181	4.31	NA	0.308344	30.49	WB
137	BoLA-DRB3_01104	SAEPVFTASVPIPDF	5	FTASVPIPD	0.51	0	OmpA	0.210386	4.59	NA	0.331617	23.85	WB
139	BoLA-DRB3_01104	EPVFTASVPIPDFGL	3	FTASVPIPD	0.81	0	OmpA	0.204818	4.82	NA	0.343591	20.68	WB
157	BoLA-DRB3_01104	RDTVTLTGTAPSSEH	3	VTLTGTAPS	0.98	0	OmpA	0.202247	4.93	NA	0.31715	27.96	WB
138	BoLA-DRB3_01105	AEPVFTASVPIPDFG	4	FTASVPIPD	0.79	0	OmpA	0.489742	0.39	NA	0.453851	12.3	SB
88	BoLA-DRB3_01105	GNTVTLIGDFPDEAA	3	VTLIGDFPD	0.96	0	OmpA	0.458181	0.51	NA	0.405244	23.17	SB
118	BoLA-DRB3_01105	VNVIDQIHVDPVVRS	3	IDQIHVDPV	0.7	0	OmpA	0.456857	0.51	NA	0.463035	10.61	SB
120	BoLA-DRB3_01105	VIDQIHVDPVVRSLD	4	IHVDPVVRS	0.95	0	OmpA	0.442116	0.58	NA	0.455255	12.06	SB
139	BoLA-DRB3_01105	EPVFTASVPIPDFGL	3	FTASVPIPD	0.91	0	OmpA	0.412836	0.73	NA	0.469405	9.52	SB
87	BoLA-DRB3_01105	SGNTVTLIGDFPDEA	4	VTLIGDFPD	0.99	0	OmpA	0.406897	0.78	NA	0.384817	28.66	SB
121	BoLA-DRB3_01105	IDQIHVDPVVRSLDF	3	IHVDPVVRS	1	0	OmpA	0.400586	0.82	NA	0.449533	13.06	SB
119	BoLA-DRB3_01105	NVIDQIHVDPVVRSL	5	IHVDPVVRS	0.59	0	OmpA	0.400545	0.82	NA	0.465746	10.14	SB
137	BoLA-DRB3_01105	SAEPVFTASVPIPDF	5	FTASVPIPD	0.68	0	OmpA	0.397012	0.85	NA	0.455649	11.99	SB
183	BoLA-DRB3_01105	WPDMKIVNNIEVTGQ	3	MKIVNNIEV	0.8	0	OmpA	0.392393	0.89	NA	0.400173	24.5	SB
117	BoLA-DRB3_01105	GVNVIDQIHVDPVVR	4	IDQIHVDPV	0.95	0	OmpA	0.374136	1.04	NA	0.412359	21.33	WB
115	BoLA-DRB3_01105	APGVNVIDQIHVDPV	3	VNVIDQIHV	0.71	0	OmpA	0.335077	1.45	NA	0.401706	24.11	WB
182	BoLA-DRB3_01105	TWPDMKIVNNIEVTG	4	MKIVNNIEV	0.94	0	OmpA	0.317385	1.64	NA	0.385815	28.37	WB
184	BoLA-DRB3_01105	PDMKIVNNIEVTGQA	2	MKIVNNIEV	0.64	0	OmpA	0.316088	1.66	NA	0.397293	25.24	WB
116	BoLA-DRB3_01105	PGVNVIDQIHVDPVV	5	IDQIHVDPV	0.72	0	OmpA	0.314323	1.68	NA	0.409796	21.98	WB
114	BoLA-DRB3_01105	LAPGVNVIDQIHVDP	4	VNVIDQIHV	0.92	0	OmpA	0.303478	1.83	NA	0.376587	30.99	WB
86	BoLA-DRB3_01105	RSGNTVTLIGDFPDE	5	VTLIGDFPD	0.95	0	OmpA	0.301581	1.85	NA	0.372545	32.13	WB
136	BoLA-DRB3_01105	SSAEPVFTASVPIPD	6	FTASVPIPD	0.51	0	OmpA	0.2856	2.12	NA	0.410548	21.79	WB
185	BoLA-DRB3_01105	DMKIVNNIEVTGQAP	3	IVNNIEVTG	0.49	0	OmpA	0.282563	2.18	NA	0.394233	26.05	WB
186	BoLA-DRB3_01105	MKIVNNIEVTGQAPP	3	VNNIEVTGQ	0.79	0	OmpA	0.247696	2.91	NA	0.386706	28.11	WB
122	BoLA-DRB3_01105	DQIHVDPVVRSLDFS	2	IHVDPVVRS	0.98	0	OmpA	0.228659	3.43	NA	0.41039	21.83	WB
291	BoLA-DRB3_01105	AGDHIATVGLGSVNP	4	IATVGLGSV	0.92	0	OmpA	0.227079	3.48	NA	0.391273	26.86	WB
89	BoLA-DRB3_01105	NTVTLIGDFPDEAAK	2	VTLIGDFPD	0.82	0	OmpA	0.219569	3.71	NA	0.401095	24.26	WB
287	BoLA-DRB3_01105	ARGVAGDHIATVGLG	3	VAGDHIATV	0.99	0	OmpA	0.217016	3.8	NA	0.284216	59.39	WB
303	BoLA-DRB3_01105	VNPIASNATPEGRAK	3	IASNATPEG	0.97	0	OmpA	0.211773	3.96	NA	0.23449	73.46	WB
292	BoLA-DRB3_01105	GDHIATVGLGSVNPI	3	IATVGLGSV	0.94	0	OmpA	0.20304	4.26	NA	0.423222	18.72	WB
111	BoLA-DRB3_01105	NGLLAPGVNVIDQIH	3	LAPGVNVID	0.9	0	OmpA	0.198584	4.42	NA	0.41312	21.14	WB
181	BoLA-DRB3_01105	STWPDMKIVNNIEVT	5	MKIVNNIEV	1	0	OmpA	0.195558	4.53	NA	0.382204	29.42	WB
140	BoLA-DRB3_01105	PVFTASVPIPDFGLK	2	FTASVPIPD	0.88	0	OmpA	0.189994	4.76	NA	0.452312	12.57	WB
212	BoLA-DRB3_01105	QSAINAVTGGPIAFG	3	INAVTGGPI	0.97	0	OmpA	0.186913	4.89	NA	0.422722	18.83	WB
4	BoLA-DRB3_01105	KAGLGQTPATTDARR	3	LGQTPATTD	1	0	OmpA	0.185032	4.97	NA	0.280108	60.6	WB
120	BoLA-DRB3_01106	VIDQIHVDPVVRSLD	4	IHVDPVVRS	1	0	OmpA	0.485844	0.07	NA	0.385587	10.52	SB
121	BoLA-DRB3_01106	IDQIHVDPVVRSLDF	3	IHVDPVVRS	1	0	OmpA	0.480249	0.08	NA	0.39025	9.75	SB
118	BoLA-DRB3_01106	VNVIDQIHVDPVVRS	3	IDQIHVDPV	0.77	0	OmpA	0.393002	0.25	NA	0.377108	11.97	SB
119	BoLA-DRB3_01106	NVIDQIHVDPVVRSL	5	IHVDPVVRS	0.68	0	OmpA	0.37309	0.32	NA	0.392973	9.34	SB
183	BoLA-DRB3_01106	WPDMKIVNNIEVTGQ	3	MKIVNNIEV	0.81	0	OmpA	0.312664	0.62	NA	0.323392	23.79	SB
122	BoLA-DRB3_01106	DQIHVDPVVRSLDFS	2	IHVDPVVRS	1	0	OmpA	0.301988	0.68	NA	0.356949	15.84	SB
303	BoLA-DRB3_01106	VNPIASNATPEGRAK	3	IASNATPEG	1	0	OmpA	0.29088	0.78	NA	0.201979	63.04	SB
117	BoLA-DRB3_01106	GVNVIDQIHVDPVVR	4	IDQIHVDPV	0.98	0	OmpA	0.282194	0.85	NA	0.315325	25.9	SB
138	BoLA-DRB3_01106	AEPVFTASVPIPDFG	4	FTASVPIPD	0.67	0	OmpA	0.278143	0.89	NA	0.34703	18.01	SB
184	BoLA-DRB3_01106	PDMKIVNNIEVTGQA	2	MKIVNNIEV	0.49	0	OmpA	0.273695	0.94	NA	0.335534	20.7	SB
59	BoLA-DRB3_01106	PTGVLPTLTPTSTRG	3	VLPTLTPTS	1	0	OmpA	0.264079	1.05	NA	0.390073	9.78	WB
185	BoLA-DRB3_01106	DMKIVNNIEVTGQAP	3	IVNNIEVTG	0.76	0	OmpA	0.255717	1.15	NA	0.333239	21.28	WB
182	BoLA-DRB3_01106	TWPDMKIVNNIEVTG	4	MKIVNNIEV	0.93	0	OmpA	0.232998	1.48	NA	0.30324	29.32	WB
302	BoLA-DRB3_01106	SVNPIASNATPEGRA	4	IASNATPEG	0.98	0	OmpA	0.225609	1.61	NA	0.208121	60.95	WB
58	BoLA-DRB3_01106	GPTGVLPTLTPTSTR	4	VLPTLTPTS	1	0	OmpA	0.203696	1.99	NA	0.394021	9.18	WB
139	BoLA-DRB3_01106	EPVFTASVPIPDFGL	3	FTASVPIPD	0.81	0	OmpA	0.199815	2.09	NA	0.356308	15.97	WB
137	BoLA-DRB3_01106	SAEPVFTASVPIPDF	5	FTASVPIPD	0.52	0	OmpA	0.197158	2.16	NA	0.345781	18.29	WB
186	BoLA-DRB3_01106	MKIVNNIEVTGQAPP	3	VNNIEVTGQ	0.64	0	OmpA	0.194766	2.22	NA	0.323219	23.83	WB
157	BoLA-DRB3_01106	RDTVTLTGTAPSSEH	3	VTLTGTAPS	0.98	0	OmpA	0.184295	2.5	NA	0.353263	16.63	WB
287	BoLA-DRB3_01106	ARGVAGDHIATVGLG	3	VAGDHIATV	0.99	0	OmpA	0.176129	2.75	NA	0.20864	60.78	WB
301	BoLA-DRB3_01106	GSVNPIASNATPEGR	5	IASNATPEG	0.7	0	OmpA	0.172611	2.86	NA	0.21131	59.87	WB
304	BoLA-DRB3_01106	NPIASNATPEGRAKN	2	IASNATPEG	1	0	OmpA	0.168455	2.99	NA	0.168996	73.78	WB
115	BoLA-DRB3_01106	APGVNVIDQIHVDPV	3	VNVIDQIHV	0.82	0	OmpA	0.168194	3	NA	0.276663	37.61	WB
116	BoLA-DRB3_01106	PGVNVIDQIHVDPVV	5	IDQIHVDPV	0.68	0	OmpA	0.163936	3.15	NA	0.29582	31.55	WB
114	BoLA-DRB3_01106	LAPGVNVIDQIHVDP	4	VNVIDQIHV	0.93	0	OmpA	0.157692	3.37	NA	0.254748	44.84	WB
76	BoLA-DRB3_01106	ALSLSLLSISRSGNT	3	LSLLSISRS	0.99	0	OmpA	0.153853	3.51	NA	0.571088	0.09	WB
156	BoLA-DRB3_01106	ERDTVTLTGTAPSSE	4	VTLTGTAPS	0.99	0	OmpA	0.144532	3.89	NA	0.338064	20.08	WB
181	BoLA-DRB3_01106	STWPDMKIVNNIEVT	5	MKIVNNIEV	0.99	0	OmpA	0.13825	4.18	NA	0.295939	31.52	WB
126	BoLA-DRB3_01106	VDPVVRSLDFSSAEP	3	VVRSLDFSS	0.66	0	OmpA	0.134334	4.37	NA	0.39096	9.65	WB
75	BoLA-DRB3_01106	SALSLSLLSISRSGN	4	LSLLSISRS	0.9	0	OmpA	0.132166	4.48	NA	0.573179	0.09	WB
212	BoLA-DRB3_01106	QSAINAVTGGPIAFG	3	INAVTGGPI	0.95	0	OmpA	0.124321	4.92	NA	0.318215	25.13	WB
286	BoLA-DRB3_01106	VARGVAGDHIATVGL	4	VAGDHIATV	0.99	0	OmpA	0.123566	4.96	NA	0.219667	56.98	WB
91	BoLA-DRB3_01201	VTLIGDFPDEAAKAA	3	IGDFPDEAA	1	0	OmpA	0.72818	0.82	NA	0.438626	6.74	SB
90	BoLA-DRB3_01201	TVTLIGDFPDEAAKA	4	IGDFPDEAA	1	0	OmpA	0.675193	1.05	NA	0.433225	7.36	WB
118	BoLA-DRB3_01201	VNVIDQIHVDPVVRS	3	IDQIHVDPV	0.99	0	OmpA	0.62066	1.3	NA	0.507449	1.81	WB
254	BoLA-DRB3_01201	RVTINGYTDNTGSEG	3	INGYTDNTG	1	0	OmpA	0.565199	1.63	NA	0.250905	53.41	WB
117	BoLA-DRB3_01201	GVNVIDQIHVDPVVR	4	IDQIHVDPV	0.99	0	OmpA	0.564978	1.63	NA	0.462102	4.44	WB
89	BoLA-DRB3_01201	NTVTLIGDFPDEAAK	5	IGDFPDEAA	0.99	0	OmpA	0.536777	1.81	NA	0.403584	11.71	WB
92	BoLA-DRB3_01201	TLIGDFPDEAAKAAL	2	IGDFPDEAA	1	0	OmpA	0.509662	2	NA	0.401169	12.1	WB
253	BoLA-DRB3_01201	ARVTINGYTDNTGSE	4	INGYTDNTG	1	0	OmpA	0.493699	2.12	NA	0.266771	48.05	WB
119	BoLA-DRB3_01201	NVIDQIHVDPVVRSL	2	IDQIHVDPV	0.88	0	OmpA	0.400497	2.92	NA	0.509791	1.72	WB
116	BoLA-DRB3_01201	PGVNVIDQIHVDPVV	5	IDQIHVDPV	0.95	0	OmpA	0.374842	3.2	NA	0.436264	7	WB
183	BoLA-DRB3_01201	WPDMKIVNNIEVTGQ	3	MKIVNNIEV	1	0	OmpA	0.368483	3.27	NA	0.406077	11.32	WB
252	BoLA-DRB3_01201	DARVTINGYTDNTGS	5	INGYTDNTG	1	0	OmpA	0.334308	3.69	NA	0.261199	49.95	WB
255	BoLA-DRB3_01201	VTINGYTDNTGSEGI	2	INGYTDNTG	0.99	0	OmpA	0.290253	4.33	NA	0.209796	67.02	WB
182	BoLA-DRB3_01201	TWPDMKIVNNIEVTG	4	MKIVNNIEV	1	0	OmpA	0.273222	4.61	NA	0.389487	14.22	WB
91	BoLA-DRB3_01202	VTLIGDFPDEAAKAA	3	IGDFPDEAA	1	0	OmpA	0.705175	0.87	NA	0.455178	9.57	SB
90	BoLA-DRB3_01202	TVTLIGDFPDEAAKA	4	IGDFPDEAA	1	0	OmpA	0.634207	1.25	NA	0.455554	9.52	WB
118	BoLA-DRB3_01202	VNVIDQIHVDPVVRS	3	IDQIHVDPV	0.98	0	OmpA	0.614079	1.36	NA	0.526843	2.89	WB
254	BoLA-DRB3_01202	RVTINGYTDNTGSEG	3	INGYTDNTG	1	0	OmpA	0.59697	1.47	NA	0.265632	54.48	WB
117	BoLA-DRB3_01202	GVNVIDQIHVDPVVR	4	IDQIHVDPV	0.99	0	OmpA	0.551552	1.79	NA	0.467965	7.95	WB
183	BoLA-DRB3_01202	WPDMKIVNNIEVTGQ	3	MKIVNNIEV	1	0	OmpA	0.530803	1.95	NA	0.424643	14.22	WB
253	BoLA-DRB3_01202	ARVTINGYTDNTGSE	4	INGYTDNTG	1	0	OmpA	0.522635	2.02	NA	0.279017	50.48	WB
89	BoLA-DRB3_01202	NTVTLIGDFPDEAAK	5	IGDFPDEAA	0.99	0	OmpA	0.460583	2.64	NA	0.416732	15.61	WB
92	BoLA-DRB3_01202	TLIGDFPDEAAKAAL	2	IGDFPDEAA	1	0	OmpA	0.455166	2.7	NA	0.408918	17.08	WB
182	BoLA-DRB3_01202	TWPDMKIVNNIEVTG	4	MKIVNNIEV	1	0	OmpA	0.427061	2.99	NA	0.411247	16.63	WB
184	BoLA-DRB3_01202	PDMKIVNNIEVTGQA	2	MKIVNNIEV	0.94	0	OmpA	0.393738	3.44	NA	0.419962	15.04	WB
119	BoLA-DRB3_01202	NVIDQIHVDPVVRSL	2	IDQIHVDPV	0.83	0	OmpA	0.388657	3.51	NA	0.530192	2.73	WB
252	BoLA-DRB3_01202	DARVTINGYTDNTGS	5	INGYTDNTG	0.99	0	OmpA	0.352265	4.03	NA	0.27538	51.57	WB
116	BoLA-DRB3_01202	PGVNVIDQIHVDPVV	5	IDQIHVDPV	0.91	0	OmpA	0.34865	4.09	NA	0.441794	11.43	WB
255	BoLA-DRB3_01202	VTINGYTDNTGSEGI	2	INGYTDNTG	0.99	0	OmpA	0.299794	4.97	NA	0.227729	65.51	WB
118	BoLA-DRB3_01203	VNVIDQIHVDPVVRS	3	IDQIHVDPV	0.97	0	OmpA	0.527696	1.25	NA	0.488361	1.7	WB
91	BoLA-DRB3_01203	VTLIGDFPDEAAKAA	3	IGDFPDEAA	0.99	0	OmpA	0.50911	1.36	NA	0.332424	21.71	WB
117	BoLA-DRB3_01203	GVNVIDQIHVDPVVR	4	IDQIHVDPV	0.98	0	OmpA	0.47011	1.66	NA	0.426021	5.78	WB
90	BoLA-DRB3_01203	TVTLIGDFPDEAAKA	4	IGDFPDEAA	0.98	0	OmpA	0.44619	1.85	NA	0.336744	20.65	WB
254	BoLA-DRB3_01203	RVTINGYTDNTGSEG	3	INGYTDNTG	1	0	OmpA	0.436525	1.94	NA	0.202739	62.58	WB
183	BoLA-DRB3_01203	WPDMKIVNNIEVTGQ	3	MKIVNNIEV	0.97	0	OmpA	0.423641	2.06	NA	0.41	7.56	WB
253	BoLA-DRB3_01203	ARVTINGYTDNTGSE	4	INGYTDNTG	1	0	OmpA	0.37006	2.67	NA	0.222042	56.05	WB
182	BoLA-DRB3_01203	TWPDMKIVNNIEVTG	4	MKIVNNIEV	0.98	0	OmpA	0.338005	3.11	NA	0.398563	9.1	WB
119	BoLA-DRB3_01203	NVIDQIHVDPVVRSL	2	IDQIHVDPV	0.83	0	OmpA	0.316526	3.45	NA	0.49083	1.61	WB
89	BoLA-DRB3_01203	NTVTLIGDFPDEAAK	5	IGDFPDEAA	0.92	0	OmpA	0.306092	3.64	NA	0.319054	25.19	WB
184	BoLA-DRB3_01203	PDMKIVNNIEVTGQA	2	MKIVNNIEV	0.93	0	OmpA	0.301012	3.73	NA	0.398756	9.07	WB
92	BoLA-DRB3_01203	TLIGDFPDEAAKAAL	2	IGDFPDEAA	0.99	0	OmpA	0.296784	3.81	NA	0.298125	30.89	WB
116	BoLA-DRB3_01203	PGVNVIDQIHVDPVV	5	IDQIHVDPV	0.93	0	OmpA	0.289546	3.94	NA	0.399858	8.93	WB
121	BoLA-DRB3_01301	IDQIHVDPVVRSLDF	3	IHVDPVVRS	1	0	OmpA	0.610099	0.04	NA	0.507129	2.81	SB
120	BoLA-DRB3_01301	VIDQIHVDPVVRSLD	4	IHVDPVVRS	0.99	0	OmpA	0.603361	0.04	NA	0.500742	3.18	SB
303	BoLA-DRB3_01301	VNPIASNATPEGRAK	3	IASNATPEG	1	0	OmpA	0.563314	0.06	NA	0.367525	21.04	SB
183	BoLA-DRB3_01301	WPDMKIVNNIEVTGQ	3	MKIVNNIEV	0.8	0	OmpA	0.492349	0.14	NA	0.415341	12.07	SB
119	BoLA-DRB3_01301	NVIDQIHVDPVVRSL	5	IHVDPVVRS	0.76	0	OmpA	0.476953	0.16	NA	0.510789	2.61	SB
118	BoLA-DRB3_01301	VNVIDQIHVDPVVRS	3	IDQIHVDPV	0.72	0	OmpA	0.459096	0.19	NA	0.471142	5.37	SB
184	BoLA-DRB3_01301	PDMKIVNNIEVTGQA	2	MKIVNNIEV	0.62	0	OmpA	0.456676	0.19	NA	0.427939	10.18	SB
302	BoLA-DRB3_01301	SVNPIASNATPEGRA	4	IASNATPEG	1	0	OmpA	0.456208	0.19	NA	0.355355	23.76	SB
122	BoLA-DRB3_01301	DQIHVDPVVRSLDFS	2	IHVDPVVRS	1	0	OmpA	0.408668	0.32	NA	0.467886	5.66	SB
182	BoLA-DRB3_01301	TWPDMKIVNNIEVTG	4	MKIVNNIEV	0.94	0	OmpA	0.385484	0.4	NA	0.378967	18.71	SB
304	BoLA-DRB3_01301	NPIASNATPEGRAKN	2	IASNATPEG	1	0	OmpA	0.376812	0.43	NA	0.331863	29.49	SB
185	BoLA-DRB3_01301	DMKIVNNIEVTGQAP	3	IVNNIEVTG	0.81	0	OmpA	0.364587	0.48	NA	0.414672	12.18	SB
117	BoLA-DRB3_01301	GVNVIDQIHVDPVVR	4	IDQIHVDPV	0.98	0	OmpA	0.34682	0.58	NA	0.380166	18.47	SB
301	BoLA-DRB3_01301	GSVNPIASNATPEGR	5	IASNATPEG	0.91	0	OmpA	0.323283	0.7	NA	0.330067	29.93	SB
181	BoLA-DRB3_01301	STWPDMKIVNNIEVT	5	MKIVNNIEV	1	0	OmpA	0.255291	1.42	NA	0.357635	23.25	WB
29	BoLA-DRB3_01301	RPWLIGAVVIPLLIA	3	LIGAVVIPL	0.91	0	OmpA	0.240476	1.66	NA	0.588726	0.38	WB
116	BoLA-DRB3_01301	PGVNVIDQIHVDPVV	5	IDQIHVDPV	0.73	0	OmpA	0.227516	1.9	NA	0.347395	25.63	WB
244	BoLA-DRB3_01301	ADKLKACPDARVTIN	3	LKACPDARV	1	0	OmpA	0.217202	2.1	NA	0.386693	17.19	WB
287	BoLA-DRB3_01301	ARGVAGDHIATVGLG	3	VAGDHIATV	1	0	OmpA	0.215382	2.14	NA	0.312124	34.66	WB
130	BoLA-DRB3_01301	VRSLDFSSAEPVFTA	3	LDFSSAEPV	0.99	0	OmpA	0.213143	2.19	NA	0.457316	6.64	WB
59	BoLA-DRB3_01301	PTGVLPTLTPTSTRG	3	VLPTLTPTS	1	0	OmpA	0.19977	2.49	NA	0.438792	8.76	WB
186	BoLA-DRB3_01301	MKIVNNIEVTGQAPP	2	IVNNIEVTG	0.73	0	OmpA	0.191077	2.74	NA	0.393174	15.96	WB
115	BoLA-DRB3_01301	APGVNVIDQIHVDPV	3	VNVIDQIHV	0.79	0	OmpA	0.184335	2.94	NA	0.307736	35.82	WB
28	BoLA-DRB3_01301	GRPWLIGAVVIPLLI	4	LIGAVVIPL	0.93	0	OmpA	0.182753	2.98	NA	0.570696	0.64	WB
277	BoLA-DRB3_01301	RAKIVADYLVARGVA	3	IVADYLVAR	0.88	0	OmpA	0.170648	3.43	NA	0.468677	5.58	WB
157	BoLA-DRB3_01301	RDTVTLTGTAPSSEH	3	VTLTGTAPS	0.98	0	OmpA	0.168137	3.52	NA	0.39891	14.91	WB
103	BoLA-DRB3_01301	KAALMTALNGLLAPG	3	LMTALNGLL	0.88	0	OmpA	0.166085	3.59	NA	0.484622	4.26	WB
243	BoLA-DRB3_01301	VADKLKACPDARVTI	4	LKACPDARV	1	0	OmpA	0.165606	3.61	NA	0.394056	15.8	WB
286	BoLA-DRB3_01301	VARGVAGDHIATVGL	4	VAGDHIATV	0.99	0	OmpA	0.16239	3.72	NA	0.325524	31.1	WB
114	BoLA-DRB3_01301	LAPGVNVIDQIHVDP	4	VNVIDQIHV	0.97	0	OmpA	0.161214	3.76	NA	0.26576	48.08	WB
129	BoLA-DRB3_01301	VVRSLDFSSAEPVFT	4	LDFSSAEPV	1	0	OmpA	0.160193	3.8	NA	0.433526	9.43	WB
58	BoLA-DRB3_01301	GPTGVLPTLTPTSTR	4	VLPTLTPTS	1	0	OmpA	0.159057	3.84	NA	0.4437	8.18	WB
27	BoLA-DRB3_01301	PGRPWLIGAVVIPLL	5	LIGAVVIPL	0.98	0	OmpA	0.142492	4.56	NA	0.551082	1.04	WB
126	BoLA-DRB3_01301	VDPVVRSLDFSSAEP	3	VVRSLDFSS	0.92	0	OmpA	0.138924	4.76	NA	0.369664	20.59	WB
212	BoLA-DRB3_01301	QSAINAVTGGPIAFG	3	INAVTGGPI	0.95	0	OmpA	0.137663	4.83	NA	0.367673	21.01	WB
300	BoLA-DRB3_01301	LGSVNPIASNATPEG	3	VNPIASNAT	0.56	0	OmpA	0.136399	4.91	NA	0.298935	38.36	WB
303	BoLA-DRB3_01302	VNPIASNATPEGRAK	3	IASNATPEG	1	0	OmpA	0.518036	0.1	NA	0.305998	27.57	SB
121	BoLA-DRB3_01302	IDQIHVDPVVRSLDF	3	IHVDPVVRS	0.99	0	OmpA	0.481868	0.14	NA	0.441212	4.88	SB
120	BoLA-DRB3_01302	VIDQIHVDPVVRSLD	4	IHVDPVVRS	0.94	0	OmpA	0.475229	0.15	NA	0.436053	5.33	SB
183	BoLA-DRB3_01302	WPDMKIVNNIEVTGQ	3	MKIVNNIEV	0.81	0	OmpA	0.466062	0.17	NA	0.363281	14.89	SB
184	BoLA-DRB3_01302	PDMKIVNNIEVTGQA	2	MKIVNNIEV	0.64	0	OmpA	0.421359	0.27	NA	0.371129	13.51	SB
302	BoLA-DRB3_01302	SVNPIASNATPEGRA	4	IASNATPEG	1	0	OmpA	0.401714	0.32	NA	0.287917	32.48	SB
118	BoLA-DRB3_01302	VNVIDQIHVDPVVRS	3	IDQIHVDPV	0.75	0	OmpA	0.397811	0.34	NA	0.428225	6.01	SB
119	BoLA-DRB3_01302	NVIDQIHVDPVVRSL	5	IHVDPVVRS	0.66	0	OmpA	0.387565	0.37	NA	0.449265	4.26	SB
185	BoLA-DRB3_01302	DMKIVNNIEVTGQAP	3	IVNNIEVTG	0.89	0	OmpA	0.358028	0.51	NA	0.352333	17	SB
182	BoLA-DRB3_01302	TWPDMKIVNNIEVTG	4	MKIVNNIEV	0.95	0	OmpA	0.349501	0.56	NA	0.33294	21.12	SB
304	BoLA-DRB3_01302	NPIASNATPEGRAKN	2	IASNATPEG	1	0	OmpA	0.327747	0.69	NA	0.26979	37.63	SB
122	BoLA-DRB3_01302	DQIHVDPVVRSLDFS	2	IHVDPVVRS	1	0	OmpA	0.313722	0.77	NA	0.386527	11.08	SB
117	BoLA-DRB3_01302	GVNVIDQIHVDPVVR	4	IDQIHVDPV	0.97	0	OmpA	0.294976	0.93	NA	0.354273	16.6	SB
301	BoLA-DRB3_01302	GSVNPIASNATPEGR	5	IASNATPEG	0.91	0	OmpA	0.262923	1.27	NA	0.264485	39.22	WB
130	BoLA-DRB3_01302	VRSLDFSSAEPVFTA	3	LDFSSAEPV	0.96	0	OmpA	0.261591	1.29	NA	0.440307	4.95	WB
244	BoLA-DRB3_01302	ADKLKACPDARVTIN	3	LKACPDARV	0.99	0	OmpA	0.242711	1.56	NA	0.380353	12.02	WB
29	BoLA-DRB3_01302	RPWLIGAVVIPLLIA	3	LIGAVVIPL	0.93	0	OmpA	0.239606	1.61	NA	0.528647	0.87	WB
115	BoLA-DRB3_01302	APGVNVIDQIHVDPV	3	VNVIDQIHV	0.82	0	OmpA	0.208277	2.26	NA	0.279071	34.96	WB
181	BoLA-DRB3_01302	STWPDMKIVNNIEVT	5	MKIVNNIEV	1	0	OmpA	0.201425	2.42	NA	0.313755	25.69	WB
243	BoLA-DRB3_01302	VADKLKACPDARVTI	4	LKACPDARV	0.99	0	OmpA	0.195106	2.59	NA	0.375503	12.78	WB
116	BoLA-DRB3_01302	PGVNVIDQIHVDPVV	5	IDQIHVDPV	0.54	0	OmpA	0.194518	2.61	NA	0.316121	25.1	WB
287	BoLA-DRB3_01302	ARGVAGDHIATVGLG	3	VAGDHIATV	1	0	OmpA	0.193581	2.64	NA	0.231268	49.54	WB
129	BoLA-DRB3_01302	VVRSLDFSSAEPVFT	4	LDFSSAEPV	1	0	OmpA	0.192119	2.68	NA	0.408124	8.15	WB
28	BoLA-DRB3_01302	GRPWLIGAVVIPLLI	4	LIGAVVIPL	0.93	0	OmpA	0.184829	2.9	NA	0.511825	1.26	WB
186	BoLA-DRB3_01302	MKIVNNIEVTGQAPP	2	IVNNIEVTG	0.86	0	OmpA	0.182386	2.97	NA	0.324193	23.15	WB
277	BoLA-DRB3_01302	RAKIVADYLVARGVA	3	IVADYLVAR	0.89	0	OmpA	0.179091	3.08	NA	0.430538	5.81	WB
212	BoLA-DRB3_01302	QSAINAVTGGPIAFG	3	INAVTGGPI	0.97	0	OmpA	0.172563	3.31	NA	0.345576	18.37	WB
114	BoLA-DRB3_01302	LAPGVNVIDQIHVDP	4	VNVIDQIHV	0.95	0	OmpA	0.164646	3.6	NA	0.237263	47.6	WB
138	BoLA-DRB3_01302	AEPVFTASVPIPDFG	4	FTASVPIPD	0.62	0	OmpA	0.155468	3.98	NA	0.371152	13.51	WB
276	BoLA-DRB3_01302	QRAKIVADYLVARGV	4	IVADYLVAR	0.82	0	OmpA	0.155036	4	NA	0.425114	6.3	WB
286	BoLA-DRB3_01302	VARGVAGDHIATVGL	4	VAGDHIATV	0.98	0	OmpA	0.150241	4.21	NA	0.258842	40.9	WB
27	BoLA-DRB3_01302	PGRPWLIGAVVIPLL	5	LIGAVVIPL	0.94	0	OmpA	0.148621	4.28	NA	0.502247	1.55	WB
103	BoLA-DRB3_01302	KAALMTALNGLLAPG	3	LMTALNGLL	0.85	0	OmpA	0.147557	4.33	NA	0.435292	5.4	WB
281	BoLA-DRB3_01302	VADYLVARGVAGDHI	3	YLVARGVAG	0.93	0	OmpA	0.146742	4.37	NA	0.419034	6.9	WB
131	BoLA-DRB3_01302	RSLDFSSAEPVFTAS	2	LDFSSAEPV	0.65	0	OmpA	0.145333	4.43	NA	0.425739	6.24	WB
270	BoLA-DRB3_01302	NIPLSAQRAKIVADY	3	LSAQRAKIV	0.99	0	OmpA	0.144514	4.47	NA	0.430247	5.84	WB
280	BoLA-DRB3_01302	IVADYLVARGVAGDH	4	YLVARGVAG	0.95	0	OmpA	0.144418	4.47	NA	0.425176	6.29	WB
242	BoLA-DRB3_01302	RVADKLKACPDARVT	5	LKACPDARV	0.99	0	OmpA	0.143518	4.51	NA	0.346217	18.23	WB
59	BoLA-DRB3_01302	PTGVLPTLTPTSTRG	3	VLPTLTPTS	1	0	OmpA	0.136806	4.88	NA	0.357612	15.92	WB
275	BoLA-DRB3_01302	AQRAKIVADYLVARG	5	IVADYLVAR	0.54	0	OmpA	0.135272	4.97	NA	0.407401	8.23	WB
120	BoLA-DRB3_01303	VIDQIHVDPVVRSLD	4	IHVDPVVRS	1	0	OmpA	0.525404	0.04	NA	0.399333	2.27	SB
121	BoLA-DRB3_01303	IDQIHVDPVVRSLDF	3	IHVDPVVRS	1	0	OmpA	0.522608	0.04	NA	0.409921	1.77	SB
119	BoLA-DRB3_01303	NVIDQIHVDPVVRSL	5	IHVDPVVRS	0.73	0	OmpA	0.423744	0.12	NA	0.407763	1.86	SB
118	BoLA-DRB3_01303	VNVIDQIHVDPVVRS	3	IDQIHVDPV	0.7	0	OmpA	0.391981	0.16	NA	0.370557	4.17	SB
183	BoLA-DRB3_01303	WPDMKIVNNIEVTGQ	3	MKIVNNIEV	0.74	0	OmpA	0.375492	0.19	NA	0.26661	21.92	SB
122	BoLA-DRB3_01303	DQIHVDPVVRSLDFS	2	IHVDPVVRS	1	0	OmpA	0.3639	0.21	NA	0.381742	3.31	SB
184	BoLA-DRB3_01303	PDMKIVNNIEVTGQA	2	MKIVNNIEV	0.54	0	OmpA	0.362732	0.21	NA	0.275085	19.63	SB
277	BoLA-DRB3_01303	RAKIVADYLVARGVA	3	IVADYLVAR	0.99	0	OmpA	0.333324	0.31	NA	0.42267	1.33	SB
185	BoLA-DRB3_01303	DMKIVNNIEVTGQAP	3	IVNNIEVTG	0.91	0	OmpA	0.32035	0.37	NA	0.263244	22.86	SB
303	BoLA-DRB3_01303	VNPIASNATPEGRAK	3	IASNATPEG	1	0	OmpA	0.307536	0.44	NA	0.209385	40.82	SB
182	BoLA-DRB3_01303	TWPDMKIVNNIEVTG	4	MKIVNNIEV	0.91	0	OmpA	0.297948	0.49	NA	0.249125	26.98	SB
117	BoLA-DRB3_01303	GVNVIDQIHVDPVVR	4	IDQIHVDPV	0.94	0	OmpA	0.29116	0.53	NA	0.290432	15.91	SB
276	BoLA-DRB3_01303	QRAKIVADYLVARGV	4	IVADYLVAR	0.98	0	OmpA	0.283651	0.57	NA	0.413764	1.62	SB
115	BoLA-DRB3_01303	APGVNVIDQIHVDPV	3	VNVIDQIHV	0.9	0	OmpA	0.241932	0.99	NA	0.236497	31.04	SB
302	BoLA-DRB3_01303	SVNPIASNATPEGRA	4	IASNATPEG	1	0	OmpA	0.232502	1.09	NA	0.193324	47.13	WB
275	BoLA-DRB3_01303	AQRAKIVADYLVARG	5	IVADYLVAR	0.78	0	OmpA	0.230763	1.12	NA	0.392814	2.61	WB
114	BoLA-DRB3_01303	LAPGVNVIDQIHVDP	4	VNVIDQIHV	0.99	0	OmpA	0.220999	1.27	NA	0.203017	43.31	WB
116	BoLA-DRB3_01303	PGVNVIDQIHVDPVV	5	IDQIHVDPV	0.54	0	OmpA	0.212539	1.41	NA	0.260114	23.73	WB
287	BoLA-DRB3_01303	ARGVAGDHIATVGLG	3	VAGDHIATV	1	0	OmpA	0.206582	1.52	NA	0.223391	35.62	WB
181	BoLA-DRB3_01303	STWPDMKIVNNIEVT	5	MKIVNNIEV	0.99	0	OmpA	0.192266	1.83	NA	0.229752	33.35	WB
304	BoLA-DRB3_01303	NPIASNATPEGRAKN	2	IASNATPEG	0.99	0	OmpA	0.167206	2.53	NA	0.190868	48.07	WB
186	BoLA-DRB3_01303	MKIVNNIEVTGQAPP	2	IVNNIEVTG	0.8	0	OmpA	0.163193	2.69	NA	0.245882	28.01	WB
286	BoLA-DRB3_01303	VARGVAGDHIATVGL	4	VAGDHIATV	1	0	OmpA	0.162549	2.71	NA	0.237445	30.72	WB
301	BoLA-DRB3_01303	GSVNPIASNATPEGR	5	IASNATPEG	0.91	0	OmpA	0.151967	3.14	NA	0.179662	52.59	WB
29	BoLA-DRB3_01303	RPWLIGAVVIPLLIA	3	LIGAVVIPL	0.9	0	OmpA	0.150105	3.22	NA	0.45777	0.53	WB
113	BoLA-DRB3_01303	LLAPGVNVIDQIHVD	5	VNVIDQIHV	0.92	0	OmpA	0.141241	3.62	NA	0.227567	34.15	WB
278	BoLA-DRB3_01303	AKIVADYLVARGVAG	2	IVADYLVAR	0.81	0	OmpA	0.138455	3.76	NA	0.402575	2.11	WB
103	BoLA-DRB3_01303	KAALMTALNGLLAPG	3	LMTALNGLL	0.89	0	OmpA	0.137675	3.79	NA	0.347736	6.41	WB
285	BoLA-DRB3_01303	LVARGVAGDHIATVG	5	VAGDHIATV	0.99	0	OmpA	0.136453	3.85	NA	0.240238	29.79	WB
130	BoLA-DRB3_01303	VRSLDFSSAEPVFTA	3	LDFSSAEPV	0.99	0	OmpA	0.131496	4.11	NA	0.338529	7.5	WB
120	BoLA-DRB3_01304	VIDQIHVDPVVRSLD	4	IHVDPVVRS	0.99	0	OmpA	0.547933	0.01	NA	0.503937	1.16	SB
121	BoLA-DRB3_01304	IDQIHVDPVVRSLDF	3	IHVDPVVRS	1	0	OmpA	0.544075	0.01	NA	0.513402	0.91	SB
119	BoLA-DRB3_01304	NVIDQIHVDPVVRSL	5	IHVDPVVRS	0.86	0	OmpA	0.404102	0.08	NA	0.506714	1.08	SB
122	BoLA-DRB3_01304	DQIHVDPVVRSLDFS	2	IHVDPVVRS	1	0	OmpA	0.353585	0.15	NA	0.47915	2.06	SB
183	BoLA-DRB3_01304	WPDMKIVNNIEVTGQ	3	MKIVNNIEV	0.72	0	OmpA	0.318349	0.22	NA	0.368797	14.32	SB
277	BoLA-DRB3_01304	RAKIVADYLVARGVA	3	IVADYLVAR	0.94	0	OmpA	0.309103	0.24	NA	0.495253	1.4	SB
118	BoLA-DRB3_01304	VNVIDQIHVDPVVRS	3	IDQIHVDPV	0.56	0	OmpA	0.309058	0.24	NA	0.471247	2.46	SB
184	BoLA-DRB3_01304	PDMKIVNNIEVTGQA	4	IVNNIEVTG	0.46	0	OmpA	0.295825	0.28	NA	0.376885	12.84	SB
185	BoLA-DRB3_01304	DMKIVNNIEVTGQAP	3	IVNNIEVTG	0.87	0	OmpA	0.273514	0.38	NA	0.367288	14.62	SB
276	BoLA-DRB3_01304	QRAKIVADYLVARGV	4	IVADYLVAR	0.94	0	OmpA	0.266626	0.41	NA	0.488107	1.68	SB
303	BoLA-DRB3_01304	VNPIASNATPEGRAK	3	IASNATPEG	1	0	OmpA	0.244573	0.56	NA	0.273098	39.72	SB
182	BoLA-DRB3_01304	TWPDMKIVNNIEVTG	4	MKIVNNIEV	0.94	0	OmpA	0.235638	0.63	NA	0.349258	18.42	SB
275	BoLA-DRB3_01304	AQRAKIVADYLVARG	5	IVADYLVAR	0.86	0	OmpA	0.220159	0.79	NA	0.465787	2.76	SB
115	BoLA-DRB3_01304	APGVNVIDQIHVDPV	3	VNVIDQIHV	0.94	0	OmpA	0.212748	0.88	NA	0.314648	27.17	SB
287	BoLA-DRB3_01304	ARGVAGDHIATVGLG	3	VAGDHIATV	1	0	OmpA	0.207524	0.94	NA	0.305748	29.66	SB
114	BoLA-DRB3_01304	LAPGVNVIDQIHVDP	4	VNVIDQIHV	0.97	0	OmpA	0.202975	1	NA	0.280711	37.28	SB
302	BoLA-DRB3_01304	SVNPIASNATPEGRA	4	IASNATPEG	1	0	OmpA	0.181754	1.34	NA	0.264298	42.56	WB
117	BoLA-DRB3_01304	GVNVIDQIHVDPVVR	4	IDQIHVDPV	0.95	0	OmpA	0.181342	1.35	NA	0.364183	15.23	WB
286	BoLA-DRB3_01304	VARGVAGDHIATVGL	4	VAGDHIATV	1	0	OmpA	0.166129	1.65	NA	0.322567	25.05	WB
278	BoLA-DRB3_01304	AKIVADYLVARGVAG	2	IVADYLVAR	0.82	0	OmpA	0.153947	1.97	NA	0.470685	2.48	WB
285	BoLA-DRB3_01304	LVARGVAGDHIATVG	5	VAGDHIATV	1	0	OmpA	0.145337	2.24	NA	0.308966	28.73	WB
186	BoLA-DRB3_01304	MKIVNNIEVTGQAPP	2	IVNNIEVTG	0.79	0	OmpA	0.144813	2.26	NA	0.343034	19.89	WB
116	BoLA-DRB3_01304	PGVNVIDQIHVDPVV	2	VNVIDQIHV	0.51	0	OmpA	0.140687	2.39	NA	0.33684	21.42	WB
181	BoLA-DRB3_01304	STWPDMKIVNNIEVT	5	MKIVNNIEV	1	0	OmpA	0.127149	2.93	NA	0.330209	23.09	WB
234	BoLA-DRB3_01304	PADYEILNRVADKLK	3	YEILNRVAD	0.74	0	OmpA	0.126628	2.96	NA	0.307372	29.18	WB
304	BoLA-DRB3_01304	NPIASNATPEGRAKN	2	IASNATPEG	1	0	OmpA	0.126074	2.98	NA	0.24441	49.22	WB
301	BoLA-DRB3_01304	GSVNPIASNATPEGR	5	IASNATPEG	0.93	0	OmpA	0.122629	3.15	NA	0.251897	46.68	WB
113	BoLA-DRB3_01304	LLAPGVNVIDQIHVD	5	VNVIDQIHV	0.92	0	OmpA	0.119371	3.32	NA	0.319743	25.8	WB
29	BoLA-DRB3_01304	RPWLIGAVVIPLLIA	3	LIGAVVIPL	0.91	0	OmpA	0.101162	4.39	NA	0.544759	0.38	WB
120	BoLA-DRB3_0140101	VIDQIHVDPVVRSLD	4	IHVDPVVRS	0.92	0	OmpA	0.415903	0.29	NA	0.388052	5.23	SB
121	BoLA-DRB3_0140101	IDQIHVDPVVRSLDF	3	IHVDPVVRS	0.98	0	OmpA	0.396324	0.35	NA	0.372783	7.45	SB
119	BoLA-DRB3_0140101	NVIDQIHVDPVVRSL	5	IHVDPVVRS	0.74	0	OmpA	0.348308	0.55	NA	0.397398	4.16	SB
138	BoLA-DRB3_0140101	AEPVFTASVPIPDFG	4	FTASVPIPD	0.8	0	OmpA	0.335888	0.62	NA	0.362978	9.1	SB
118	BoLA-DRB3_0140101	VNVIDQIHVDPVVRS	3	IDQIHVDPV	0.54	0	OmpA	0.327679	0.68	NA	0.409105	3.02	SB
88	BoLA-DRB3_0140101	GNTVTLIGDFPDEAA	3	VTLIGDFPD	0.99	0	OmpA	0.32263	0.71	NA	0.317995	19.93	SB
139	BoLA-DRB3_0140101	EPVFTASVPIPDFGL	3	FTASVPIPD	0.93	0	OmpA	0.293831	0.96	NA	0.377859	6.67	SB
115	BoLA-DRB3_0140101	APGVNVIDQIHVDPV	3	VNVIDQIHV	0.67	0	OmpA	0.274456	1.16	NA	0.329335	16.76	WB
87	BoLA-DRB3_0140101	SGNTVTLIGDFPDEA	4	VTLIGDFPD	1	0	OmpA	0.27087	1.21	NA	0.291957	28.19	WB
114	BoLA-DRB3_0140101	LAPGVNVIDQIHVDP	4	VNVIDQIHV	0.84	0	OmpA	0.263258	1.3	NA	0.289929	28.89	WB
277	BoLA-DRB3_0140101	RAKIVADYLVARGVA	3	IVADYLVAR	0.95	0	OmpA	0.259562	1.34	NA	0.384246	5.73	WB
122	BoLA-DRB3_0140101	DQIHVDPVVRSLDFS	2	IHVDPVVRS	0.86	0	OmpA	0.257613	1.37	NA	0.340965	13.76	WB
276	BoLA-DRB3_0140101	QRAKIVADYLVARGV	4	IVADYLVAR	0.92	0	OmpA	0.233091	1.78	NA	0.392431	4.7	WB
137	BoLA-DRB3_0140101	SAEPVFTASVPIPDF	5	FTASVPIPD	0.69	0	OmpA	0.232116	1.8	NA	0.366122	8.54	WB
186	BoLA-DRB3_0140101	MKIVNNIEVTGQAPP	3	VNNIEVTGQ	0.71	0	OmpA	0.226229	1.9	NA	0.272106	35.22	WB
117	BoLA-DRB3_0140101	GVNVIDQIHVDPVVR	4	IDQIHVDPV	0.83	0	OmpA	0.220537	2	NA	0.369344	7.98	WB
116	BoLA-DRB3_0140101	PGVNVIDQIHVDPVV	5	IDQIHVDPV	0.45	0	OmpA	0.217802	2.07	NA	0.351976	11.26	WB
185	BoLA-DRB3_0140101	DMKIVNNIEVTGQAP	4	VNNIEVTGQ	0.49	0	OmpA	0.214021	2.16	NA	0.279592	32.56	WB
275	BoLA-DRB3_0140101	AQRAKIVADYLVARG	5	IVADYLVAR	0.84	0	OmpA	0.211693	2.22	NA	0.38098	6.2	WB
4	BoLA-DRB3_0140101	KAGLGQTPATTDARR	3	LGQTPATTD	1	0	OmpA	0.207539	2.32	NA	0.179189	70.56	WB
212	BoLA-DRB3_0140101	QSAINAVTGGPIAFG	3	INAVTGGPI	0.99	0	OmpA	0.197558	2.59	NA	0.331087	16.28	WB
189	BoLA-DRB3_0140101	VNNIEVTGQAPPGPP	3	IEVTGQAPP	0.98	0	OmpA	0.186394	2.93	NA	0.176129	71.64	WB
183	BoLA-DRB3_0140101	WPDMKIVNNIEVTGQ	3	MKIVNNIEV	0.7	0	OmpA	0.185533	2.96	NA	0.289571	29.02	WB
184	BoLA-DRB3_0140101	PDMKIVNNIEVTGQA	2	MKIVNNIEV	0.38	0	OmpA	0.183139	3.03	NA	0.287044	29.92	WB
303	BoLA-DRB3_0140101	VNPIASNATPEGRAK	3	IASNATPEG	0.86	0	OmpA	0.174401	3.34	NA	0.157917	77.73	WB
86	BoLA-DRB3_0140101	RSGNTVTLIGDFPDE	5	VTLIGDFPD	0.95	0	OmpA	0.17091	3.46	NA	0.25899	40.2	WB
3	BoLA-DRB3_0140101	SKAGLGQTPATTDAR	4	LGQTPATTD	1	0	OmpA	0.164364	3.74	NA	0.17104	73.43	WB
211	BoLA-DRB3_0140101	LQSAINAVTGGPIAF	4	INAVTGGPI	1	0	OmpA	0.160173	3.93	NA	0.346458	12.48	WB
187	BoLA-DRB3_0140101	KIVNNIEVTGQAPPG	2	VNNIEVTGQ	0.51	0	OmpA	0.156958	4.08	NA	0.214576	57.54	WB
210	BoLA-DRB3_0140101	DLQSAINAVTGGPIA	5	INAVTGGPI	0.96	0	OmpA	0.150406	4.42	NA	0.325854	17.72	WB
302	BoLA-DRB3_0140101	SVNPIASNATPEGRA	4	IASNATPEG	0.75	0	OmpA	0.145315	4.7	NA	0.156766	78.09	WB
113	BoLA-DRB3_0140101	LLAPGVNVIDQIHVD	5	VNVIDQIHV	0.82	0	OmpA	0.143204	4.83	NA	0.320252	19.26	WB
111	BoLA-DRB3_0140101	NGLLAPGVNVIDQIH	3	LAPGVNVID	0.88	0	OmpA	0.141379	4.93	NA	0.307582	23.04	WB
188	BoLA-DRB3_0140101	IVNNIEVTGQAPPGP	4	IEVTGQAPP	0.89	0	OmpA	0.140671	4.98	NA	0.196649	64.31	WB
118	BoLA-DRB3_0140102	VNVIDQIHVDPVVRS	3	IDQIHVDPV	0.69	0	OmpA	0.407334	0.4	NA	0.389234	6.26	SB
120	BoLA-DRB3_0140102	VIDQIHVDPVVRSLD	4	IHVDPVVRS	0.95	0	OmpA	0.404511	0.41	NA	0.368988	9.22	SB
121	BoLA-DRB3_0140102	IDQIHVDPVVRSLDF	3	IHVDPVVRS	0.96	0	OmpA	0.385486	0.5	NA	0.349249	13.07	SB
119	BoLA-DRB3_0140102	NVIDQIHVDPVVRSL	5	IHVDPVVRS	0.63	0	OmpA	0.362702	0.65	NA	0.374315	8.32	SB
138	BoLA-DRB3_0140102	AEPVFTASVPIPDFG	4	FTASVPIPD	0.8	0	OmpA	0.34024	0.82	NA	0.350663	12.77	SB
88	BoLA-DRB3_0140102	GNTVTLIGDFPDEAA	3	VTLIGDFPD	1	0	OmpA	0.333728	0.88	NA	0.293327	28.26	SB
183	BoLA-DRB3_0140102	WPDMKIVNNIEVTGQ	3	MKIVNNIEV	0.8	0	OmpA	0.313296	1.05	NA	0.293675	28.16	WB
115	BoLA-DRB3_0140102	APGVNVIDQIHVDPV	3	VNVIDQIHV	0.77	0	OmpA	0.300363	1.22	NA	0.331325	17.29	WB
114	BoLA-DRB3_0140102	LAPGVNVIDQIHVDP	4	VNVIDQIHV	0.94	0	OmpA	0.297002	1.27	NA	0.266983	37.4	WB
117	BoLA-DRB3_0140102	GVNVIDQIHVDPVVR	4	IDQIHVDPV	0.92	0	OmpA	0.288993	1.4	NA	0.353587	12.16	WB
139	BoLA-DRB3_0140102	EPVFTASVPIPDFGL	3	FTASVPIPD	0.89	0	OmpA	0.285538	1.45	NA	0.367973	9.39	WB
212	BoLA-DRB3_0140102	QSAINAVTGGPIAFG	3	INAVTGGPI	0.97	0	OmpA	0.285171	1.46	NA	0.32383	19.26	WB
87	BoLA-DRB3_0140102	SGNTVTLIGDFPDEA	4	VTLIGDFPD	0.99	0	OmpA	0.279195	1.55	NA	0.271224	35.85	WB
122	BoLA-DRB3_0140102	DQIHVDPVVRSLDFS	2	IHVDPVVRS	0.83	0	OmpA	0.267018	1.75	NA	0.325597	18.79	WB
184	BoLA-DRB3_0140102	PDMKIVNNIEVTGQA	2	MKIVNNIEV	0.57	0	OmpA	0.264833	1.79	NA	0.283755	31.45	WB
137	BoLA-DRB3_0140102	SAEPVFTASVPIPDF	5	FTASVPIPD	0.67	0	OmpA	0.259169	1.9	NA	0.35615	11.64	WB
116	BoLA-DRB3_0140102	PGVNVIDQIHVDPVV	5	IDQIHVDPV	0.51	0	OmpA	0.25626	1.95	NA	0.344593	14.11	WB
182	BoLA-DRB3_0140102	TWPDMKIVNNIEVTG	4	MKIVNNIEV	0.87	0	OmpA	0.244403	2.22	NA	0.275622	34.27	WB
211	BoLA-DRB3_0140102	LQSAINAVTGGPIAF	4	INAVTGGPI	0.99	0	OmpA	0.241045	2.3	NA	0.35009	12.89	WB
210	BoLA-DRB3_0140102	DLQSAINAVTGGPIA	5	INAVTGGPI	0.97	0	OmpA	0.228803	2.61	NA	0.331261	17.31	WB
185	BoLA-DRB3_0140102	DMKIVNNIEVTGQAP	3	IVNNIEVTG	0.53	0	OmpA	0.227163	2.66	NA	0.271482	35.75	WB
277	BoLA-DRB3_0140102	RAKIVADYLVARGVA	3	IVADYLVAR	0.91	0	OmpA	0.222843	2.79	NA	0.354973	11.87	WB
4	BoLA-DRB3_0140102	KAGLGQTPATTDARR	3	LGQTPATTD	0.99	0	OmpA	0.221994	2.81	NA	0.17762	70.08	WB
189	BoLA-DRB3_0140102	VNNIEVTGQAPPGPP	3	IEVTGQAPP	0.96	0	OmpA	0.221768	2.82	NA	0.169353	72.76	WB
186	BoLA-DRB3_0140102	MKIVNNIEVTGQAPP	3	VNNIEVTGQ	0.71	0	OmpA	0.219159	2.89	NA	0.273376	35.07	WB
303	BoLA-DRB3_0140102	VNPIASNATPEGRAK	3	IASNATPEG	0.88	0	OmpA	0.198714	3.61	NA	0.1684	73.07	WB
276	BoLA-DRB3_0140102	QRAKIVADYLVARGV	4	IVADYLVAR	0.87	0	OmpA	0.197917	3.64	NA	0.356573	11.55	WB
275	BoLA-DRB3_0140102	AQRAKIVADYLVARG	5	IVADYLVAR	0.74	0	OmpA	0.195618	3.74	NA	0.355682	11.73	WB
86	BoLA-DRB3_0140102	RSGNTVTLIGDFPDE	5	VTLIGDFPD	0.95	0	OmpA	0.184982	4.22	NA	0.242382	46.28	WB
113	BoLA-DRB3_0140102	LLAPGVNVIDQIHVD	5	VNVIDQIHV	0.85	0	OmpA	0.1816	4.38	NA	0.298281	26.73	WB
126	BoLA-DRB3_0140102	VDPVVRSLDFSSAEP	4	VRSLDFSSA	0.46	0	OmpA	0.179353	4.49	NA	0.370519	8.96	WB
287	BoLA-DRB3_0140102	ARGVAGDHIATVGLG	3	VAGDHIATV	0.99	0	OmpA	0.178261	4.54	NA	0.189059	66.09	WB
3	BoLA-DRB3_0140102	SKAGLGQTPATTDAR	4	LGQTPATTD	0.98	0	OmpA	0.173349	4.79	NA	0.171065	72.21	WB
188	BoLA-DRB3_0140102	IVNNIEVTGQAPPGP	4	IEVTGQAPP	0.92	0	OmpA	0.172947	4.81	NA	0.188612	66.25	WB
120	BoLA-DRB3_01401	VIDQIHVDPVVRSLD	4	IHVDPVVRS	0.92	0	OmpA	0.415903	0.29	NA	0.388052	5.23	SB
121	BoLA-DRB3_01401	IDQIHVDPVVRSLDF	3	IHVDPVVRS	0.98	0	OmpA	0.396324	0.35	NA	0.372783	7.45	SB
119	BoLA-DRB3_01401	NVIDQIHVDPVVRSL	5	IHVDPVVRS	0.74	0	OmpA	0.348308	0.55	NA	0.397398	4.16	SB
138	BoLA-DRB3_01401	AEPVFTASVPIPDFG	4	FTASVPIPD	0.8	0	OmpA	0.335888	0.62	NA	0.362978	9.1	SB
118	BoLA-DRB3_01401	VNVIDQIHVDPVVRS	3	IDQIHVDPV	0.54	0	OmpA	0.327679	0.68	NA	0.409105	3.02	SB
88	BoLA-DRB3_01401	GNTVTLIGDFPDEAA	3	VTLIGDFPD	0.99	0	OmpA	0.32263	0.71	NA	0.317995	19.93	SB
139	BoLA-DRB3_01401	EPVFTASVPIPDFGL	3	FTASVPIPD	0.93	0	OmpA	0.293831	0.96	NA	0.377859	6.67	SB
115	BoLA-DRB3_01401	APGVNVIDQIHVDPV	3	VNVIDQIHV	0.67	0	OmpA	0.274456	1.16	NA	0.329335	16.76	WB
87	BoLA-DRB3_01401	SGNTVTLIGDFPDEA	4	VTLIGDFPD	1	0	OmpA	0.27087	1.21	NA	0.291957	28.19	WB
114	BoLA-DRB3_01401	LAPGVNVIDQIHVDP	4	VNVIDQIHV	0.84	0	OmpA	0.263258	1.3	NA	0.289929	28.89	WB
277	BoLA-DRB3_01401	RAKIVADYLVARGVA	3	IVADYLVAR	0.95	0	OmpA	0.259562	1.34	NA	0.384246	5.73	WB
122	BoLA-DRB3_01401	DQIHVDPVVRSLDFS	2	IHVDPVVRS	0.86	0	OmpA	0.257613	1.37	NA	0.340965	13.76	WB
276	BoLA-DRB3_01401	QRAKIVADYLVARGV	4	IVADYLVAR	0.92	0	OmpA	0.233091	1.78	NA	0.392431	4.7	WB
137	BoLA-DRB3_01401	SAEPVFTASVPIPDF	5	FTASVPIPD	0.69	0	OmpA	0.232116	1.8	NA	0.366122	8.54	WB
186	BoLA-DRB3_01401	MKIVNNIEVTGQAPP	3	VNNIEVTGQ	0.71	0	OmpA	0.226229	1.9	NA	0.272106	35.22	WB
117	BoLA-DRB3_01401	GVNVIDQIHVDPVVR	4	IDQIHVDPV	0.83	0	OmpA	0.220537	2	NA	0.369344	7.98	WB
116	BoLA-DRB3_01401	PGVNVIDQIHVDPVV	5	IDQIHVDPV	0.45	0	OmpA	0.217802	2.07	NA	0.351976	11.26	WB
185	BoLA-DRB3_01401	DMKIVNNIEVTGQAP	4	VNNIEVTGQ	0.49	0	OmpA	0.214021	2.16	NA	0.279592	32.56	WB
275	BoLA-DRB3_01401	AQRAKIVADYLVARG	5	IVADYLVAR	0.84	0	OmpA	0.211693	2.22	NA	0.38098	6.2	WB
4	BoLA-DRB3_01401	KAGLGQTPATTDARR	3	LGQTPATTD	1	0	OmpA	0.207539	2.32	NA	0.179189	70.56	WB
212	BoLA-DRB3_01401	QSAINAVTGGPIAFG	3	INAVTGGPI	0.99	0	OmpA	0.197558	2.59	NA	0.331087	16.28	WB
189	BoLA-DRB3_01401	VNNIEVTGQAPPGPP	3	IEVTGQAPP	0.98	0	OmpA	0.186394	2.93	NA	0.176129	71.64	WB
183	BoLA-DRB3_01401	WPDMKIVNNIEVTGQ	3	MKIVNNIEV	0.7	0	OmpA	0.185533	2.96	NA	0.289571	29.02	WB
184	BoLA-DRB3_01401	PDMKIVNNIEVTGQA	2	MKIVNNIEV	0.38	0	OmpA	0.183139	3.03	NA	0.287044	29.92	WB
303	BoLA-DRB3_01401	VNPIASNATPEGRAK	3	IASNATPEG	0.86	0	OmpA	0.174401	3.34	NA	0.157917	77.73	WB
86	BoLA-DRB3_01401	RSGNTVTLIGDFPDE	5	VTLIGDFPD	0.95	0	OmpA	0.17091	3.46	NA	0.25899	40.2	WB
3	BoLA-DRB3_01401	SKAGLGQTPATTDAR	4	LGQTPATTD	1	0	OmpA	0.164364	3.74	NA	0.17104	73.43	WB
211	BoLA-DRB3_01401	LQSAINAVTGGPIAF	4	INAVTGGPI	1	0	OmpA	0.160173	3.93	NA	0.346458	12.48	WB
187	BoLA-DRB3_01401	KIVNNIEVTGQAPPG	2	VNNIEVTGQ	0.51	0	OmpA	0.156958	4.08	NA	0.214576	57.54	WB
210	BoLA-DRB3_01401	DLQSAINAVTGGPIA	5	INAVTGGPI	0.96	0	OmpA	0.150406	4.42	NA	0.325854	17.72	WB
302	BoLA-DRB3_01401	SVNPIASNATPEGRA	4	IASNATPEG	0.75	0	OmpA	0.145315	4.7	NA	0.156766	78.09	WB
113	BoLA-DRB3_01401	LLAPGVNVIDQIHVD	5	VNVIDQIHV	0.82	0	OmpA	0.143204	4.83	NA	0.320252	19.26	WB
111	BoLA-DRB3_01401	NGLLAPGVNVIDQIH	3	LAPGVNVID	0.88	0	OmpA	0.141379	4.93	NA	0.307582	23.04	WB
188	BoLA-DRB3_01401	IVNNIEVTGQAPPGP	4	IEVTGQAPP	0.89	0	OmpA	0.140671	4.98	NA	0.196649	64.31	WB
138	BoLA-DRB3_01402	AEPVFTASVPIPDFG	4	FTASVPIPD	0.96	0	OmpA	0.707818	0.03	NA	0.509249	2.59	SB
139	BoLA-DRB3_01402	EPVFTASVPIPDFGL	3	FTASVPIPD	0.97	0	OmpA	0.665076	0.06	NA	0.54253	1.26	SB
137	BoLA-DRB3_01402	SAEPVFTASVPIPDF	5	FTASVPIPD	0.87	0	OmpA	0.59177	0.13	NA	0.502044	3	SB
120	BoLA-DRB3_01402	VIDQIHVDPVVRSLD	4	IHVDPVVRS	1	0	OmpA	0.454245	0.51	NA	0.416615	12.68	SB
121	BoLA-DRB3_01402	IDQIHVDPVVRSLDF	3	IHVDPVVRS	1	0	OmpA	0.426282	0.64	NA	0.418061	12.41	SB
140	BoLA-DRB3_01402	PVFTASVPIPDFGLK	2	FTASVPIPD	0.97	0	OmpA	0.407159	0.76	NA	0.519626	2.09	SB
136	BoLA-DRB3_01402	SSAEPVFTASVPIPD	6	FTASVPIPD	0.78	0	OmpA	0.382233	0.94	NA	0.421111	11.87	SB
303	BoLA-DRB3_01402	VNPIASNATPEGRAK	3	IASNATPEG	0.92	0	OmpA	0.379672	0.96	NA	0.244646	60.63	SB
183	BoLA-DRB3_01402	WPDMKIVNNIEVTGQ	3	MKIVNNIEV	0.74	0	OmpA	0.356297	1.16	NA	0.330828	33.3	WB
234	BoLA-DRB3_01402	PADYEILNRVADKLK	3	YEILNRVAD	0.96	0	OmpA	0.350459	1.22	NA	0.414184	13.12	WB
119	BoLA-DRB3_01402	NVIDQIHVDPVVRSL	5	IHVDPVVRS	0.81	0	OmpA	0.336239	1.38	NA	0.418383	12.35	WB
302	BoLA-DRB3_01402	SVNPIASNATPEGRA	4	IASNATPEG	0.87	0	OmpA	0.325313	1.48	NA	0.236463	63.18	WB
4	BoLA-DRB3_01402	KAGLGQTPATTDARR	3	LGQTPATTD	1	0	OmpA	0.32011	1.55	NA	0.272573	51.61	WB
184	BoLA-DRB3_01402	PDMKIVNNIEVTGQA	2	MKIVNNIEV	0.55	0	OmpA	0.313284	1.64	NA	0.328453	33.99	WB
280	BoLA-DRB3_01402	IVADYLVARGVAGDH	4	YLVARGVAG	0.81	0	OmpA	0.311134	1.67	NA	0.406408	14.57	WB
118	BoLA-DRB3_01402	VNVIDQIHVDPVVRS	6	IHVDPVVRS	0.52	0	OmpA	0.276225	2.28	NA	0.41488	13	WB
281	BoLA-DRB3_01402	VADYLVARGVAGDHI	3	YLVARGVAG	0.72	0	OmpA	0.270763	2.38	NA	0.401885	15.46	WB
185	BoLA-DRB3_01402	DMKIVNNIEVTGQAP	3	IVNNIEVTG	0.77	0	OmpA	0.270029	2.4	NA	0.30683	40.67	WB
182	BoLA-DRB3_01402	TWPDMKIVNNIEVTG	4	MKIVNNIEV	0.88	0	OmpA	0.259855	2.6	NA	0.310969	39.39	WB
212	BoLA-DRB3_01402	QSAINAVTGGPIAFG	3	INAVTGGPI	0.98	0	OmpA	0.256217	2.67	NA	0.387155	18.51	WB
301	BoLA-DRB3_01402	GSVNPIASNATPEGR	5	IASNATPEG	0.76	0	OmpA	0.247749	2.85	NA	0.221745	67.67	WB
122	BoLA-DRB3_01402	DQIHVDPVVRSLDFS	2	IHVDPVVRS	0.91	0	OmpA	0.246082	2.88	NA	0.38438	19.13	WB
233	BoLA-DRB3_01402	IPADYEILNRVADKL	4	YEILNRVAD	0.96	0	OmpA	0.244572	2.91	NA	0.37553	21.2	WB
3	BoLA-DRB3_01402	SKAGLGQTPATTDAR	4	LGQTPATTD	1	0	OmpA	0.232826	3.24	NA	0.25427	57.55	WB
130	BoLA-DRB3_01402	VRSLDFSSAEPVFTA	3	LDFSSAEPV	0.87	0	OmpA	0.230132	3.32	NA	0.538699	1.36	WB
232	BoLA-DRB3_01402	LIPADYEILNRVADK	5	YEILNRVAD	0.93	0	OmpA	0.225019	3.49	NA	0.34557	29	WB
304	BoLA-DRB3_01402	NPIASNATPEGRAKN	2	IASNATPEG	0.96	0	OmpA	0.216942	3.76	NA	0.213138	70.25	WB
88	BoLA-DRB3_01402	GNTVTLIGDFPDEAA	3	VTLIGDFPD	0.94	0	OmpA	0.214035	3.86	NA	0.302822	41.93	WB
211	BoLA-DRB3_01402	LQSAINAVTGGPIAF	4	INAVTGGPI	1	0	OmpA	0.213508	3.88	NA	0.407123	14.43	WB
279	BoLA-DRB3_01402	KIVADYLVARGVAGD	5	YLVARGVAG	0.9	0	OmpA	0.211358	3.95	NA	0.401392	15.56	WB
59	BoLA-DRB3_01402	PTGVLPTLTPTSTRG	3	VLPTLTPTS	1	0	OmpA	0.207639	4.08	NA	0.359376	25.18	WB
210	BoLA-DRB3_01402	DLQSAINAVTGGPIA	5	INAVTGGPI	0.97	0	OmpA	0.197774	4.44	NA	0.393278	17.18	WB
157	BoLA-DRB3_01402	RDTVTLTGTAPSSEH	3	VTLTGTAPS	0.77	0	OmpA	0.191059	4.73	NA	0.374423	21.47	WB
159	BoLA-DRB3_01402	TVTLTGTAPSSEHKD	3	LTGTAPSSE	0.97	0	OmpA	0.185934	4.95	NA	0.350446	27.6	WB
138	BoLA-DRB3_01403	AEPVFTASVPIPDFG	4	FTASVPIPD	0.82	0	OmpA	0.398109	0.33	NA	0.352677	10.58	SB
120	BoLA-DRB3_01403	VIDQIHVDPVVRSLD	4	IHVDPVVRS	0.95	0	OmpA	0.380834	0.39	NA	0.376417	6.47	SB
121	BoLA-DRB3_01403	IDQIHVDPVVRSLDF	3	IHVDPVVRS	0.94	0	OmpA	0.365444	0.48	NA	0.363775	8.45	SB
139	BoLA-DRB3_01403	EPVFTASVPIPDFGL	3	FTASVPIPD	0.89	0	OmpA	0.338759	0.62	NA	0.360281	9.09	SB
119	BoLA-DRB3_01403	NVIDQIHVDPVVRSL	5	IHVDPVVRS	0.74	0	OmpA	0.301513	0.93	NA	0.387731	4.95	SB
137	BoLA-DRB3_01403	SAEPVFTASVPIPDF	5	FTASVPIPD	0.65	0	OmpA	0.298186	0.96	NA	0.357348	9.65	SB
118	BoLA-DRB3_01403	VNVIDQIHVDPVVRS	3	IDQIHVDPV	0.55	0	OmpA	0.294873	1	NA	0.384015	5.4	SB
115	BoLA-DRB3_01403	APGVNVIDQIHVDPV	3	VNVIDQIHV	0.73	0	OmpA	0.267472	1.35	NA	0.30578	22.75	WB
88	BoLA-DRB3_01403	GNTVTLIGDFPDEAA	3	VTLIGDFPD	0.97	0	OmpA	0.265348	1.38	NA	0.263116	37.76	WB
114	BoLA-DRB3_01403	LAPGVNVIDQIHVDP	4	VNVIDQIHV	0.82	0	OmpA	0.26225	1.43	NA	0.279499	31.68	WB
277	BoLA-DRB3_01403	RAKIVADYLVARGVA	3	IVADYLVAR	0.93	0	OmpA	0.258491	1.5	NA	0.381101	5.78	WB
122	BoLA-DRB3_01403	DQIHVDPVVRSLDFS	2	IHVDPVVRS	0.88	0	OmpA	0.244732	1.75	NA	0.330829	15.6	WB
185	BoLA-DRB3_01403	DMKIVNNIEVTGQAP	3	IVNNIEVTG	0.61	0	OmpA	0.232305	1.99	NA	0.281112	31.11	WB
183	BoLA-DRB3_01403	WPDMKIVNNIEVTGQ	3	MKIVNNIEV	0.67	0	OmpA	0.228855	2.07	NA	0.289037	28.28	WB
303	BoLA-DRB3_01403	VNPIASNATPEGRAK	3	IASNATPEG	0.88	0	OmpA	0.226511	2.13	NA	0.190282	66.2	WB
276	BoLA-DRB3_01403	QRAKIVADYLVARGV	4	IVADYLVAR	0.89	0	OmpA	0.226348	2.13	NA	0.390226	4.65	WB
87	BoLA-DRB3_01403	SGNTVTLIGDFPDEA	4	VTLIGDFPD	0.96	0	OmpA	0.220613	2.26	NA	0.242299	45.91	WB
184	BoLA-DRB3_01403	PDMKIVNNIEVTGQA	2	MKIVNNIEV	0.42	0	OmpA	0.216241	2.36	NA	0.289741	28.03	WB
189	BoLA-DRB3_01403	VNNIEVTGQAPPGPP	3	IEVTGQAPP	0.96	0	OmpA	0.216118	2.37	NA	0.175231	71.67	WB
212	BoLA-DRB3_01403	QSAINAVTGGPIAFG	3	INAVTGGPI	0.95	0	OmpA	0.213319	2.43	NA	0.331368	15.46	WB
4	BoLA-DRB3_01403	KAGLGQTPATTDARR	3	LGQTPATTD	0.99	0	OmpA	0.213285	2.43	NA	0.18572	67.91	WB
186	BoLA-DRB3_01403	MKIVNNIEVTGQAPP	3	VNNIEVTGQ	0.64	0	OmpA	0.211487	2.48	NA	0.280769	31.23	WB
275	BoLA-DRB3_01403	AQRAKIVADYLVARG	5	IVADYLVAR	0.8	0	OmpA	0.200998	2.77	NA	0.378184	6.2	WB
136	BoLA-DRB3_01403	SSAEPVFTASVPIPD	4	PVFTASVPI	0.41	0	OmpA	0.195798	2.92	NA	0.312387	20.7	WB
302	BoLA-DRB3_01403	SVNPIASNATPEGRA	4	IASNATPEG	0.7	0	OmpA	0.192587	3.01	NA	0.184761	68.26	WB
117	BoLA-DRB3_01403	GVNVIDQIHVDPVVR	4	IDQIHVDPV	0.81	0	OmpA	0.189682	3.12	NA	0.353376	10.44	WB
116	BoLA-DRB3_01403	PGVNVIDQIHVDPVV	2	VNVIDQIHV	0.33	0	OmpA	0.187498	3.21	NA	0.326086	16.83	WB
159	BoLA-DRB3_01403	TVTLTGTAPSSEHKD	3	LTGTAPSSE	0.97	0	OmpA	0.17189	3.89	NA	0.257517	39.85	WB
287	BoLA-DRB3_01403	ARGVAGDHIATVGLG	3	VAGDHIATV	0.98	0	OmpA	0.171751	3.9	NA	0.220948	54.43	WB
111	BoLA-DRB3_01403	NGLLAPGVNVIDQIH	3	LAPGVNVID	0.9	0	OmpA	0.168974	4.03	NA	0.300648	24.43	WB
211	BoLA-DRB3_01403	LQSAINAVTGGPIAF	4	INAVTGGPI	0.99	0	OmpA	0.168966	4.03	NA	0.350763	10.96	WB
188	BoLA-DRB3_01403	IVNNIEVTGQAPPGP	4	IEVTGQAPP	0.93	0	OmpA	0.165185	4.22	NA	0.202254	61.68	WB
3	BoLA-DRB3_01403	SKAGLGQTPATTDAR	4	LGQTPATTD	0.98	0	OmpA	0.160694	4.44	NA	0.176904	71.1	WB
182	BoLA-DRB3_01403	TWPDMKIVNNIEVTG	4	MKIVNNIEV	0.81	0	OmpA	0.155748	4.71	NA	0.27548	33.19	WB
210	BoLA-DRB3_01403	DLQSAINAVTGGPIA	5	INAVTGGPI	0.94	0	OmpA	0.155657	4.72	NA	0.331922	15.32	WB
301	BoLA-DRB3_01403	GSVNPIASNATPEGR	5	IASNATPEG	0.59	0	OmpA	0.155256	4.74	NA	0.181434	69.51	WB
187	BoLA-DRB3_01403	KIVNNIEVTGQAPPG	5	IEVTGQAPP	0.46	0	OmpA	0.15318	4.85	NA	0.228452	51.43	WB
157	BoLA-DRB3_01403	RDTVTLTGTAPSSEH	3	VTLTGTAPS	0.74	0	OmpA	0.151176	4.96	NA	0.260788	38.64	WB
121	BoLA-DRB3_01404	IDQIHVDPVVRSLDF	3	IHVDPVVRS	0.99	0	OmpA	0.567762	0.07	NA	0.379967	5.01	SB
120	BoLA-DRB3_01404	VIDQIHVDPVVRSLD	4	IHVDPVVRS	1	0	OmpA	0.558424	0.08	NA	0.380475	4.96	SB
277	BoLA-DRB3_01404	RAKIVADYLVARGVA	3	IVADYLVAR	0.96	0	OmpA	0.460473	0.23	NA	0.404003	3.17	SB
303	BoLA-DRB3_01404	VNPIASNATPEGRAK	3	IASNATPEG	0.96	0	OmpA	0.413642	0.39	NA	0.205422	47.11	SB
122	BoLA-DRB3_01404	DQIHVDPVVRSLDFS	2	IHVDPVVRS	0.95	0	OmpA	0.407197	0.42	NA	0.338064	10	SB
119	BoLA-DRB3_01404	NVIDQIHVDPVVRSL	5	IHVDPVVRS	0.87	0	OmpA	0.39929	0.46	NA	0.385847	4.5	SB
276	BoLA-DRB3_01404	QRAKIVADYLVARGV	4	IVADYLVAR	0.98	0	OmpA	0.382099	0.53	NA	0.395341	3.75	SB
185	BoLA-DRB3_01404	DMKIVNNIEVTGQAP	3	IVNNIEVTG	0.88	0	OmpA	0.345487	0.73	NA	0.249787	31.29	SB
302	BoLA-DRB3_01404	SVNPIASNATPEGRA	4	IASNATPEG	0.92	0	OmpA	0.321424	0.91	NA	0.194504	51.36	SB
275	BoLA-DRB3_01404	AQRAKIVADYLVARG	5	IVADYLVAR	0.91	0	OmpA	0.315105	0.96	NA	0.381197	4.9	SB
184	BoLA-DRB3_01404	PDMKIVNNIEVTGQA	4	IVNNIEVTG	0.73	0	OmpA	0.278722	1.36	NA	0.255226	29.53	WB
304	BoLA-DRB3_01404	NPIASNATPEGRAKN	2	IASNATPEG	0.92	0	OmpA	0.267078	1.54	NA	0.190436	52.96	WB
278	BoLA-DRB3_01404	AKIVADYLVARGVAG	2	IVADYLVAR	0.87	0	OmpA	0.263397	1.61	NA	0.38992	4.17	WB
265	BoLA-DRB3_01404	GSEGINIPLSAQRAK	4	INIPLSAQR	0.95	0	OmpA	0.256589	1.72	NA	0.34061	9.64	WB
266	BoLA-DRB3_01404	SEGINIPLSAQRAKI	3	INIPLSAQR	0.92	0	OmpA	0.24927	1.86	NA	0.369731	6	WB
157	BoLA-DRB3_01404	RDTVTLTGTAPSSEH	3	VTLTGTAPS	0.91	0	OmpA	0.243476	1.97	NA	0.281974	21.67	WB
118	BoLA-DRB3_01404	VNVIDQIHVDPVVRS	6	IHVDPVVRS	0.55	0	OmpA	0.24302	1.98	NA	0.361265	6.92	WB
301	BoLA-DRB3_01404	GSVNPIASNATPEGR	5	IASNATPEG	0.84	0	OmpA	0.227294	2.32	NA	0.186833	54.38	WB
59	BoLA-DRB3_01404	PTGVLPTLTPTSTRG	3	VLPTLTPTS	0.98	0	OmpA	0.22349	2.4	NA	0.278633	22.52	WB
138	BoLA-DRB3_01404	AEPVFTASVPIPDFG	4	FTASVPIPD	0.63	0	OmpA	0.217781	2.53	NA	0.258417	28.51	WB
183	BoLA-DRB3_01404	WPDMKIVNNIEVTGQ	3	MKIVNNIEV	0.41	0	OmpA	0.217442	2.54	NA	0.244656	32.96	WB
186	BoLA-DRB3_01404	MKIVNNIEVTGQAPP	2	IVNNIEVTG	0.57	0	OmpA	0.203599	2.91	NA	0.25137	30.78	WB
189	BoLA-DRB3_01404	VNNIEVTGQAPPGPP	3	IEVTGQAPP	0.95	0	OmpA	0.200306	2.99	NA	0.14392	71.38	WB
156	BoLA-DRB3_01404	ERDTVTLTGTAPSSE	4	VTLTGTAPS	0.99	0	OmpA	0.183738	3.57	NA	0.262341	27.33	WB
287	BoLA-DRB3_01404	ARGVAGDHIATVGLG	3	VAGDHIATV	0.98	0	OmpA	0.170894	4.09	NA	0.217313	42.67	WB
139	BoLA-DRB3_01404	EPVFTASVPIPDFGL	3	FTASVPIPD	0.8	0	OmpA	0.169862	4.14	NA	0.269363	25.18	WB
58	BoLA-DRB3_01404	GPTGVLPTLTPTSTR	4	VLPTLTPTS	1	0	OmpA	0.162459	4.51	NA	0.277486	22.82	WB
115	BoLA-DRB3_01404	APGVNVIDQIHVDPV	3	VNVIDQIHV	0.78	0	OmpA	0.162165	4.53	NA	0.215193	43.43	WB
212	BoLA-DRB3_01404	QSAINAVTGGPIAFG	3	INAVTGGPI	0.97	0	OmpA	0.157787	4.77	NA	0.310098	15.08	WB
137	BoLA-DRB3_01404	SAEPVFTASVPIPDF	5	FTASVPIPD	0.49	0	OmpA	0.154122	4.97	NA	0.260774	27.8	WB
29	BoLA-DRB3_01501	RPWLIGAVVIPLLIA	3	LIGAVVIPL	0.87	0	OmpA	0.753064	0.83	NA	0.839875	0.01	SB
28	BoLA-DRB3_01501	GRPWLIGAVVIPLLI	4	LIGAVVIPL	0.92	0	OmpA	0.706305	1.08	NA	0.839176	0.01	WB
27	BoLA-DRB3_01501	PGRPWLIGAVVIPLL	5	LIGAVVIPL	0.96	0	OmpA	0.681102	1.21	NA	0.832965	0.02	WB
115	BoLA-DRB3_01501	APGVNVIDQIHVDPV	3	VNVIDQIHV	0.91	0	OmpA	0.553168	2.11	NA	0.558455	18	WB
114	BoLA-DRB3_01501	LAPGVNVIDQIHVDP	4	VNVIDQIHV	1	0	OmpA	0.543782	2.18	NA	0.503314	28.07	WB
30	BoLA-DRB3_01501	PWLIGAVVIPLLIAA	2	LIGAVVIPL	0.57	0	OmpA	0.486892	2.7	NA	0.819755	0.04	WB
26	BoLA-DRB3_01501	SPGRPWLIGAVVIPL	6	LIGAVVIPL	1	0	OmpA	0.486155	2.71	NA	0.799124	0.14	WB
183	BoLA-DRB3_01501	WPDMKIVNNIEVTGQ	3	MKIVNNIEV	0.93	0	OmpA	0.439093	3.23	NA	0.556852	18.28	WB
228	BoLA-DRB3_01501	DGASLIPADYEILNR	4	LIPADYEIL	1	0	OmpA	0.407916	3.64	NA	0.505844	27.57	WB
229	BoLA-DRB3_01501	GASLIPADYEILNRV	3	LIPADYEIL	0.99	0	OmpA	0.405285	3.68	NA	0.5322	22.57	WB
118	BoLA-DRB3_01501	VNVIDQIHVDPVVRS	3	IDQIHVDPV	0.93	0	OmpA	0.387924	3.95	NA	0.630254	8.34	WB
113	BoLA-DRB3_01501	LLAPGVNVIDQIHVD	5	VNVIDQIHV	0.99	0	OmpA	0.384431	4	NA	0.550523	19.37	WB
182	BoLA-DRB3_01501	TWPDMKIVNNIEVTG	4	MKIVNNIEV	0.97	0	OmpA	0.364845	4.31	NA	0.543155	20.62	WB
116	BoLA-DRB3_01501	PGVNVIDQIHVDPVV	2	VNVIDQIHV	0.56	0	OmpA	0.356935	4.43	NA	0.578176	14.9	WB
117	BoLA-DRB3_01501	GVNVIDQIHVDPVVR	4	IDQIHVDPV	0.95	0	OmpA	0.35432	4.47	NA	0.584927	13.92	WB
171	BoLA-DRB3_01501	HKDAVKRAATSTWPD	4	VKRAATSTW	1	0	OmpA	0.344286	4.66	NA	0.517662	25.29	WB
291	BoLA-DRB3_01501	AGDHIATVGLGSVNP	4	IATVGLGSV	1	0	OmpA	0.334115	4.86	NA	0.554405	18.7	WB
138	BoLA-DRB3_01502	AEPVFTASVPIPDFG	4	FTASVPIPD	0.91	0	OmpA	0.641144	0.4	NA	0.631814	5.87	SB
29	BoLA-DRB3_01502	RPWLIGAVVIPLLIA	3	LIGAVVIPL	0.97	0	OmpA	0.638837	0.41	NA	0.792645	0.03	SB
139	BoLA-DRB3_01502	EPVFTASVPIPDFGL	3	FTASVPIPD	0.99	0	OmpA	0.598815	0.61	NA	0.639661	5.12	SB
28	BoLA-DRB3_01502	GRPWLIGAVVIPLLI	4	LIGAVVIPL	0.98	0	OmpA	0.582929	0.7	NA	0.787028	0.05	SB
137	BoLA-DRB3_01502	SAEPVFTASVPIPDF	5	FTASVPIPD	0.73	0	OmpA	0.565098	0.84	NA	0.633361	5.72	SB
27	BoLA-DRB3_01502	PGRPWLIGAVVIPLL	5	LIGAVVIPL	0.98	0	OmpA	0.554709	0.91	NA	0.781891	0.07	SB
130	BoLA-DRB3_01502	VRSLDFSSAEPVFTA	3	LDFSSAEPV	0.85	0	OmpA	0.525669	1.15	NA	0.696531	1.51	WB
183	BoLA-DRB3_01502	WPDMKIVNNIEVTGQ	3	MKIVNNIEV	0.98	0	OmpA	0.524583	1.16	NA	0.494072	29.58	WB
118	BoLA-DRB3_01502	VNVIDQIHVDPVVRS	3	IDQIHVDPV	0.88	0	OmpA	0.511974	1.27	NA	0.629244	6.14	WB
117	BoLA-DRB3_01502	GVNVIDQIHVDPVVR	4	IDQIHVDPV	0.99	0	OmpA	0.451859	1.98	NA	0.586919	11.56	WB
182	BoLA-DRB3_01502	TWPDMKIVNNIEVTG	4	MKIVNNIEV	0.98	0	OmpA	0.451422	1.99	NA	0.480637	32.74	WB
129	BoLA-DRB3_01502	VVRSLDFSSAEPVFT	4	LDFSSAEPV	0.94	0	OmpA	0.448545	2.03	NA	0.686267	1.95	WB
136	BoLA-DRB3_01502	SSAEPVFTASVPIPD	6	FTASVPIPD	0.53	0	OmpA	0.43965	2.17	NA	0.573196	13.76	WB
184	BoLA-DRB3_01502	PDMKIVNNIEVTGQA	2	MKIVNNIEV	0.85	0	OmpA	0.423079	2.42	NA	0.489014	30.74	WB
131	BoLA-DRB3_01502	RSLDFSSAEPVFTAS	2	LDFSSAEPV	0.68	0	OmpA	0.398515	2.86	NA	0.667316	2.95	WB
103	BoLA-DRB3_01502	KAALMTALNGLLAPG	3	LMTALNGLL	0.93	0	OmpA	0.375093	3.35	NA	0.627414	6.35	WB
26	BoLA-DRB3_01502	SPGRPWLIGAVVIPL	6	LIGAVVIPL	1	0	OmpA	0.370561	3.45	NA	0.76432	0.16	WB
128	BoLA-DRB3_01502	PVVRSLDFSSAEPVF	5	LDFSSAEPV	0.98	0	OmpA	0.365831	3.57	NA	0.662095	3.31	WB
287	BoLA-DRB3_01502	ARGVAGDHIATVGLG	3	VAGDHIATV	0.99	0	OmpA	0.359409	3.73	NA	0.44968	40.27	WB
30	BoLA-DRB3_01502	PWLIGAVVIPLLIAA	2	LIGAVVIPL	0.73	0	OmpA	0.352038	3.91	NA	0.751883	0.26	WB
140	BoLA-DRB3_01502	PVFTASVPIPDFGLK	2	FTASVPIPD	0.95	0	OmpA	0.350911	3.94	NA	0.605134	8.99	WB
119	BoLA-DRB3_01502	NVIDQIHVDPVVRSL	2	IDQIHVDPV	0.66	0	OmpA	0.342473	4.17	NA	0.622492	6.91	WB
116	BoLA-DRB3_01502	PGVNVIDQIHVDPVV	5	IDQIHVDPV	0.79	0	OmpA	0.319363	4.85	NA	0.560287	15.96	WB
212	BoLA-DRB3_01502	QSAINAVTGGPIAFG	3	INAVTGGPI	0.98	0	OmpA	0.317332	4.92	NA	0.570779	14.17	WB
234	BoLA-DRB3_01502	PADYEILNRVADKLK	3	YEILNRVAD	0.66	0	OmpA	0.315957	4.96	NA	0.508044	26.48	WB
102	BoLA-DRB3_01502	AKAALMTALNGLLAP	4	LMTALNGLL	0.9	0	OmpA	0.314652	5	NA	0.651834	4.05	WB
183	BoLA-DRB3_01503	WPDMKIVNNIEVTGQ	3	MKIVNNIEV	0.99	0	OmpA	0.699829	0.44	NA	0.650417	13.7	SB
182	BoLA-DRB3_01503	TWPDMKIVNNIEVTG	4	MKIVNNIEV	0.99	0	OmpA	0.652563	0.68	NA	0.638199	15.63	SB
29	BoLA-DRB3_01503	RPWLIGAVVIPLLIA	3	LIGAVVIPL	0.93	0	OmpA	0.647718	0.71	NA	0.854934	0.04	SB
28	BoLA-DRB3_01503	GRPWLIGAVVIPLLI	4	LIGAVVIPL	0.94	0	OmpA	0.603938	0.98	NA	0.85139	0.06	SB
184	BoLA-DRB3_01503	PDMKIVNNIEVTGQA	2	MKIVNNIEV	0.94	0	OmpA	0.596382	1.04	NA	0.640653	15.23	WB
27	BoLA-DRB3_01503	PGRPWLIGAVVIPLL	5	LIGAVVIPL	0.95	0	OmpA	0.587684	1.11	NA	0.855839	0.04	WB
118	BoLA-DRB3_01503	VNVIDQIHVDPVVRS	3	IDQIHVDPV	0.95	0	OmpA	0.57576	1.23	NA	0.709044	6.04	WB
212	BoLA-DRB3_01503	QSAINAVTGGPIAFG	3	INAVTGGPI	1	0	OmpA	0.566103	1.32	NA	0.699127	7.08	WB
117	BoLA-DRB3_01503	GVNVIDQIHVDPVVR	4	IDQIHVDPV	0.97	0	OmpA	0.541006	1.56	NA	0.676839	9.89	WB
181	BoLA-DRB3_01503	STWPDMKIVNNIEVT	5	MKIVNNIEV	0.99	0	OmpA	0.540351	1.56	NA	0.637685	15.71	WB
115	BoLA-DRB3_01503	APGVNVIDQIHVDPV	3	VNVIDQIHV	0.77	0	OmpA	0.526423	1.7	NA	0.635412	16.08	WB
211	BoLA-DRB3_01503	LQSAINAVTGGPIAF	4	INAVTGGPI	1	0	OmpA	0.517281	1.81	NA	0.720341	4.95	WB
130	BoLA-DRB3_01503	VRSLDFSSAEPVFTA	3	LDFSSAEPV	0.96	0	OmpA	0.503036	2	NA	0.730823	4.07	WB
210	BoLA-DRB3_01503	DLQSAINAVTGGPIA	5	INAVTGGPI	0.97	0	OmpA	0.495726	2.09	NA	0.711081	5.84	WB
116	BoLA-DRB3_01503	PGVNVIDQIHVDPVV	5	IDQIHVDPV	0.59	0	OmpA	0.491769	2.14	NA	0.670031	10.81	WB
114	BoLA-DRB3_01503	LAPGVNVIDQIHVDP	4	VNVIDQIHV	1	0	OmpA	0.487501	2.2	NA	0.554103	31.34	WB
129	BoLA-DRB3_01503	VVRSLDFSSAEPVFT	4	LDFSSAEPV	0.99	0	OmpA	0.455864	2.63	NA	0.733875	3.83	WB
30	BoLA-DRB3_01503	PWLIGAVVIPLLIAA	2	LIGAVVIPL	0.58	0	OmpA	0.438197	2.91	NA	0.825487	0.22	WB
137	BoLA-DRB3_01503	SAEPVFTASVPIPDF	3	PVFTASVPI	0.64	0	OmpA	0.434527	2.97	NA	0.680633	9.38	WB
26	BoLA-DRB3_01503	SPGRPWLIGAVVIPL	6	LIGAVVIPL	0.98	0	OmpA	0.422273	3.19	NA	0.839323	0.11	WB
136	BoLA-DRB3_01503	SSAEPVFTASVPIPD	4	PVFTASVPI	0.83	0	OmpA	0.416048	3.31	NA	0.64757	14.15	WB
138	BoLA-DRB3_01503	AEPVFTASVPIPDFG	4	FTASVPIPD	0.66	0	OmpA	0.412664	3.37	NA	0.669591	10.87	WB
291	BoLA-DRB3_01503	AGDHIATVGLGSVNP	4	IATVGLGSV	0.95	0	OmpA	0.407816	3.46	NA	0.598201	22.62	WB
171	BoLA-DRB3_01503	HKDAVKRAATSTWPD	4	VKRAATSTW	0.98	0	OmpA	0.391164	3.8	NA	0.534981	35.38	WB
128	BoLA-DRB3_01503	PVVRSLDFSSAEPVF	5	LDFSSAEPV	0.96	0	OmpA	0.381073	4.02	NA	0.725083	4.54	WB
292	BoLA-DRB3_01503	GDHIATVGLGSVNPI	3	IATVGLGSV	0.98	0	OmpA	0.378228	4.08	NA	0.6531	13.29	WB
172	BoLA-DRB3_01503	KDAVKRAATSTWPDM	3	VKRAATSTW	0.97	0	OmpA	0.371882	4.24	NA	0.564008	29.24	WB
119	BoLA-DRB3_01503	NVIDQIHVDPVVRSL	2	IDQIHVDPV	0.72	0	OmpA	0.360523	4.52	NA	0.69388	7.71	WB
34	BoLA-DRB3_01503	GAVVIPLLIAAIGYG	3	VIPLLIAAI	0.99	0	OmpA	0.35731	4.6	NA	0.707025	6.24	WB
113	BoLA-DRB3_01503	LLAPGVNVIDQIHVD	5	VNVIDQIHV	0.99	0	OmpA	0.342592	4.96	NA	0.618379	18.95	WB
29	BoLA-DRB3_01504	RPWLIGAVVIPLLIA	3	LIGAVVIPL	0.94	0	OmpA	0.494571	0.33	NA	0.821804	0.01	SB
28	BoLA-DRB3_01504	GRPWLIGAVVIPLLI	4	LIGAVVIPL	0.96	0	OmpA	0.447069	0.45	NA	0.812717	0.03	SB
27	BoLA-DRB3_01504	PGRPWLIGAVVIPLL	5	LIGAVVIPL	0.97	0	OmpA	0.430476	0.5	NA	0.808211	0.04	SB
183	BoLA-DRB3_01504	WPDMKIVNNIEVTGQ	3	MKIVNNIEV	0.94	0	OmpA	0.357244	0.89	NA	0.558083	16.46	SB
182	BoLA-DRB3_01504	TWPDMKIVNNIEVTG	4	MKIVNNIEV	0.98	0	OmpA	0.307886	1.29	NA	0.544855	18.73	WB
26	BoLA-DRB3_01504	SPGRPWLIGAVVIPL	6	LIGAVVIPL	0.98	0	OmpA	0.297776	1.4	NA	0.788861	0.12	WB
130	BoLA-DRB3_01504	VRSLDFSSAEPVFTA	3	LDFSSAEPV	0.99	0	OmpA	0.288778	1.51	NA	0.628932	7.08	WB
118	BoLA-DRB3_01504	VNVIDQIHVDPVVRS	3	IDQIHVDPV	0.89	0	OmpA	0.283204	1.57	NA	0.618945	8.18	WB
30	BoLA-DRB3_01504	PWLIGAVVIPLLIAA	2	LIGAVVIPL	0.7	0	OmpA	0.279519	1.61	NA	0.79936	0.07	WB
212	BoLA-DRB3_01504	QSAINAVTGGPIAFG	3	INAVTGGPI	1	0	OmpA	0.27505	1.65	NA	0.618696	8.21	WB
184	BoLA-DRB3_01504	PDMKIVNNIEVTGQA	2	MKIVNNIEV	0.86	0	OmpA	0.258908	1.85	NA	0.55258	17.37	WB
171	BoLA-DRB3_01504	HKDAVKRAATSTWPD	4	VKRAATSTW	1	0	OmpA	0.251626	1.96	NA	0.529986	21.36	WB
129	BoLA-DRB3_01504	VVRSLDFSSAEPVFT	4	LDFSSAEPV	1	0	OmpA	0.247615	2.02	NA	0.627146	7.27	WB
115	BoLA-DRB3_01504	APGVNVIDQIHVDPV	3	VNVIDQIHV	0.78	0	OmpA	0.247335	2.03	NA	0.539258	19.69	WB
117	BoLA-DRB3_01504	GVNVIDQIHVDPVVR	4	IDQIHVDPV	0.96	0	OmpA	0.246731	2.04	NA	0.575271	13.85	WB
172	BoLA-DRB3_01504	KDAVKRAATSTWPDM	3	VKRAATSTW	0.99	0	OmpA	0.236598	2.2	NA	0.554354	17.07	WB
137	BoLA-DRB3_01504	SAEPVFTASVPIPDF	3	PVFTASVPI	0.59	0	OmpA	0.229694	2.31	NA	0.600384	10.43	WB
211	BoLA-DRB3_01504	LQSAINAVTGGPIAF	4	INAVTGGPI	1	0	OmpA	0.227558	2.35	NA	0.63346	6.62	WB
114	BoLA-DRB3_01504	LAPGVNVIDQIHVDP	4	VNVIDQIHV	0.98	0	OmpA	0.221945	2.44	NA	0.472219	33.24	WB
103	BoLA-DRB3_01504	KAALMTALNGLLAPG	3	LMTALNGLL	0.94	0	OmpA	0.221823	2.44	NA	0.679644	3.06	WB
136	BoLA-DRB3_01504	SSAEPVFTASVPIPD	4	PVFTASVPI	0.76	0	OmpA	0.217149	2.53	NA	0.569129	14.76	WB
116	BoLA-DRB3_01504	PGVNVIDQIHVDPVV	5	IDQIHVDPV	0.6	0	OmpA	0.20945	2.71	NA	0.566726	15.12	WB
210	BoLA-DRB3_01504	DLQSAINAVTGGPIA	5	INAVTGGPI	0.97	0	OmpA	0.207745	2.75	NA	0.624006	7.62	WB
181	BoLA-DRB3_01504	STWPDMKIVNNIEVT	5	MKIVNNIEV	0.99	0	OmpA	0.205916	2.79	NA	0.536724	20.13	WB
128	BoLA-DRB3_01504	PVVRSLDFSSAEPVF	5	LDFSSAEPV	0.99	0	OmpA	0.185418	3.29	NA	0.605269	9.81	WB
138	BoLA-DRB3_01504	AEPVFTASVPIPDFG	4	FTASVPIPD	0.57	0	OmpA	0.18027	3.43	NA	0.591004	11.67	WB
102	BoLA-DRB3_01504	AKAALMTALNGLLAP	4	LMTALNGLL	0.88	0	OmpA	0.178678	3.47	NA	0.693346	2.37	WB
235	BoLA-DRB3_01504	ADYEILNRVADKLKA	4	ILNRVADKL	0.98	0	OmpA	0.173694	3.62	NA	0.494244	28.52	WB
119	BoLA-DRB3_01504	NVIDQIHVDPVVRSL	2	IDQIHVDPV	0.65	0	OmpA	0.168803	3.78	NA	0.59876	10.63	WB
170	BoLA-DRB3_01504	EHKDAVKRAATSTWP	5	VKRAATSTW	1	0	OmpA	0.14968	4.46	NA	0.528192	21.69	WB
29	BoLA-DRB3_01505	RPWLIGAVVIPLLIA	3	LIGAVVIPL	0.85	0	OmpA	0.621646	0.94	NA	0.84336	0.02	SB
28	BoLA-DRB3_01505	GRPWLIGAVVIPLLI	4	LIGAVVIPL	0.86	0	OmpA	0.565432	1.28	NA	0.836581	0.03	WB
27	BoLA-DRB3_01505	PGRPWLIGAVVIPLL	5	LIGAVVIPL	0.94	0	OmpA	0.521773	1.58	NA	0.829238	0.05	WB
115	BoLA-DRB3_01505	APGVNVIDQIHVDPV	3	VNVIDQIHV	0.91	0	OmpA	0.521363	1.58	NA	0.576183	15.83	WB
114	BoLA-DRB3_01505	LAPGVNVIDQIHVDP	4	VNVIDQIHV	1	0	OmpA	0.511525	1.65	NA	0.525041	23.92	WB
183	BoLA-DRB3_01505	WPDMKIVNNIEVTGQ	3	MKIVNNIEV	0.94	0	OmpA	0.401008	2.65	NA	0.580777	15.17	WB
30	BoLA-DRB3_01505	PWLIGAVVIPLLIAA	2	LIGAVVIPL	0.55	0	OmpA	0.373553	2.98	NA	0.821766	0.08	WB
113	BoLA-DRB3_01505	LLAPGVNVIDQIHVD	5	VNVIDQIHV	1	0	OmpA	0.367888	3.05	NA	0.562604	17.81	WB
26	BoLA-DRB3_01505	SPGRPWLIGAVVIPL	6	LIGAVVIPL	0.98	0	OmpA	0.335569	3.53	NA	0.796061	0.26	WB
182	BoLA-DRB3_01505	TWPDMKIVNNIEVTG	4	MKIVNNIEV	0.97	0	OmpA	0.332682	3.58	NA	0.574664	16.04	WB
116	BoLA-DRB3_01505	PGVNVIDQIHVDPVV	2	VNVIDQIHV	0.61	0	OmpA	0.323972	3.75	NA	0.586425	14.42	WB
229	BoLA-DRB3_01505	GASLIPADYEILNRV	3	LIPADYEIL	0.98	0	OmpA	0.323581	3.76	NA	0.531455	22.85	WB
228	BoLA-DRB3_01505	DGASLIPADYEILNR	4	LIPADYEIL	1	0	OmpA	0.32042	3.81	NA	0.49304	29.71	WB
291	BoLA-DRB3_01505	AGDHIATVGLGSVNP	4	IATVGLGSV	0.99	0	OmpA	0.317373	3.87	NA	0.574242	16.1	WB
118	BoLA-DRB3_01505	VNVIDQIHVDPVVRS	3	IDQIHVDPV	0.94	0	OmpA	0.310681	4	NA	0.626317	9.49	WB
292	BoLA-DRB3_01505	GDHIATVGLGSVNPI	3	IATVGLGSV	0.99	0	OmpA	0.297288	4.27	NA	0.615097	10.78	WB
117	BoLA-DRB3_01505	GVNVIDQIHVDPVVR	4	IDQIHVDPV	0.88	0	OmpA	0.28379	4.55	NA	0.588951	14.09	WB
184	BoLA-DRB3_01505	PDMKIVNNIEVTGQA	2	MKIVNNIEV	0.88	0	OmpA	0.277359	4.7	NA	0.562165	17.88	WB
29	BoLA-DRB3_01506	RPWLIGAVVIPLLIA	3	LIGAVVIPL	0.87	0	OmpA	0.639171	1.1	NA	0.850033	0.03	WB
28	BoLA-DRB3_01506	GRPWLIGAVVIPLLI	4	LIGAVVIPL	0.9	0	OmpA	0.591529	1.4	NA	0.848104	0.03	WB
27	BoLA-DRB3_01506	PGRPWLIGAVVIPLL	5	LIGAVVIPL	0.94	0	OmpA	0.570518	1.58	NA	0.843733	0.04	WB
114	BoLA-DRB3_01506	LAPGVNVIDQIHVDP	4	VNVIDQIHV	1	0	OmpA	0.540728	1.79	NA	0.55285	24.48	WB
115	BoLA-DRB3_01506	APGVNVIDQIHVDPV	3	VNVIDQIHV	0.95	0	OmpA	0.536581	1.83	NA	0.598709	16.56	WB
183	BoLA-DRB3_01506	WPDMKIVNNIEVTGQ	3	MKIVNNIEV	0.94	0	OmpA	0.495585	2.22	NA	0.587634	18.36	WB
182	BoLA-DRB3_01506	TWPDMKIVNNIEVTG	4	MKIVNNIEV	0.97	0	OmpA	0.431425	2.98	NA	0.577493	20.03	WB
30	BoLA-DRB3_01506	PWLIGAVVIPLLIAA	2	LIGAVVIPL	0.62	0	OmpA	0.398208	3.45	NA	0.830889	0.09	WB
113	BoLA-DRB3_01506	LLAPGVNVIDQIHVD	5	VNVIDQIHV	0.98	0	OmpA	0.387821	3.62	NA	0.597044	16.83	WB
26	BoLA-DRB3_01506	SPGRPWLIGAVVIPL	6	LIGAVVIPL	0.99	0	OmpA	0.386434	3.64	NA	0.810328	0.23	WB
184	BoLA-DRB3_01506	PDMKIVNNIEVTGQA	2	MKIVNNIEV	0.85	0	OmpA	0.376902	3.8	NA	0.57916	19.75	WB
212	BoLA-DRB3_01506	QSAINAVTGGPIAFG	3	INAVTGGPI	1	0	OmpA	0.374833	3.84	NA	0.658901	8.53	WB
171	BoLA-DRB3_01506	HKDAVKRAATSTWPD	4	VKRAATSTW	1	0	OmpA	0.374411	3.85	NA	0.555073	24.06	WB
118	BoLA-DRB3_01506	VNVIDQIHVDPVVRS	3	IDQIHVDPV	0.89	0	OmpA	0.368352	3.95	NA	0.668925	7.47	WB
116	BoLA-DRB3_01506	PGVNVIDQIHVDPVV	2	VNVIDQIHV	0.6	0	OmpA	0.361629	4.07	NA	0.61921	13.46	WB
172	BoLA-DRB3_01506	KDAVKRAATSTWPDM	3	VKRAATSTW	1	0	OmpA	0.347456	4.34	NA	0.576399	20.22	WB
291	BoLA-DRB3_01506	AGDHIATVGLGSVNP	4	IATVGLGSV	1	0	OmpA	0.338828	4.5	NA	0.588604	18.21	WB
228	BoLA-DRB3_01506	DGASLIPADYEILNR	4	LIPADYEIL	1	0	OmpA	0.337968	4.52	NA	0.531123	28.62	WB
229	BoLA-DRB3_01506	GASLIPADYEILNRV	3	LIPADYEIL	0.99	0	OmpA	0.332149	4.64	NA	0.557087	23.68	WB
117	BoLA-DRB3_01506	GVNVIDQIHVDPVVR	4	IDQIHVDPV	0.9	0	OmpA	0.327661	4.73	NA	0.627333	12.33	WB
211	BoLA-DRB3_01506	LQSAINAVTGGPIAF	4	INAVTGGPI	1	0	OmpA	0.323933	4.81	NA	0.674497	6.89	WB
103	BoLA-DRB3_01506	KAALMTALNGLLAPG	3	LMTALNGLL	0.98	0	OmpA	0.318519	4.92	NA	0.69765	4.79	WB
292	BoLA-DRB3_01506	GDHIATVGLGSVNPI	3	IATVGLGSV	0.97	0	OmpA	0.316022	4.97	NA	0.633552	11.51	WB
29	BoLA-DRB3_01507	RPWLIGAVVIPLLIA	3	LIGAVVIPL	0.89	0	OmpA	0.73971	0.52	NA	0.848957	0.01	SB
28	BoLA-DRB3_01507	GRPWLIGAVVIPLLI	4	LIGAVVIPL	0.94	0	OmpA	0.696173	0.68	NA	0.848023	0.01	SB
27	BoLA-DRB3_01507	PGRPWLIGAVVIPLL	5	LIGAVVIPL	0.98	0	OmpA	0.673466	0.77	NA	0.840619	0.02	SB
115	BoLA-DRB3_01507	APGVNVIDQIHVDPV	3	VNVIDQIHV	0.92	0	OmpA	0.533692	1.61	NA	0.575716	17.18	WB
114	BoLA-DRB3_01507	LAPGVNVIDQIHVDP	4	VNVIDQIHV	1	0	OmpA	0.523138	1.69	NA	0.51022	29.19	WB
26	BoLA-DRB3_01507	SPGRPWLIGAVVIPL	6	LIGAVVIPL	1	0	OmpA	0.487694	1.99	NA	0.813855	0.09	WB
183	BoLA-DRB3_01507	WPDMKIVNNIEVTGQ	3	MKIVNNIEV	0.93	0	OmpA	0.477989	2.08	NA	0.5742	17.43	WB
30	BoLA-DRB3_01507	PWLIGAVVIPLLIAA	2	LIGAVVIPL	0.67	0	OmpA	0.453371	2.33	NA	0.830447	0.03	WB
118	BoLA-DRB3_01507	VNVIDQIHVDPVVRS	3	IDQIHVDPV	0.93	0	OmpA	0.42508	2.64	NA	0.647297	7.73	WB
182	BoLA-DRB3_01507	TWPDMKIVNNIEVTG	4	MKIVNNIEV	0.97	0	OmpA	0.410771	2.81	NA	0.563907	19.13	WB
117	BoLA-DRB3_01507	GVNVIDQIHVDPVVR	4	IDQIHVDPV	0.98	0	OmpA	0.388488	3.1	NA	0.607458	12.49	WB
113	BoLA-DRB3_01507	LLAPGVNVIDQIHVD	5	VNVIDQIHV	1	0	OmpA	0.374705	3.31	NA	0.567726	18.5	WB
228	BoLA-DRB3_01507	DGASLIPADYEILNR	4	LIPADYEIL	1	0	OmpA	0.372338	3.34	NA	0.497392	31.77	WB
229	BoLA-DRB3_01507	GASLIPADYEILNRV	3	LIPADYEIL	1	0	OmpA	0.365354	3.44	NA	0.528315	25.69	WB
116	BoLA-DRB3_01507	PGVNVIDQIHVDPVV	2	VNVIDQIHV	0.53	0	OmpA	0.360296	3.52	NA	0.600461	13.44	WB
184	BoLA-DRB3_01507	PDMKIVNNIEVTGQA	2	MKIVNNIEV	0.82	0	OmpA	0.355628	3.6	NA	0.563211	19.25	WB
171	BoLA-DRB3_01507	HKDAVKRAATSTWPD	4	VKRAATSTW	1	0	OmpA	0.342274	3.82	NA	0.531009	25.18	WB
291	BoLA-DRB3_01507	AGDHIATVGLGSVNP	4	IATVGLGSV	1	0	OmpA	0.340106	3.86	NA	0.556854	20.35	WB
172	BoLA-DRB3_01507	KDAVKRAATSTWPDM	3	VKRAATSTW	1	0	OmpA	0.322309	4.18	NA	0.546664	22.14	WB
292	BoLA-DRB3_01507	GDHIATVGLGSVNPI	3	IATVGLGSV	0.98	0	OmpA	0.314076	4.34	NA	0.610299	12.11	WB
103	BoLA-DRB3_01507	KAALMTALNGLLAPG	3	LMTALNGLL	0.99	0	OmpA	0.305753	4.49	NA	0.687583	4.1	WB
212	BoLA-DRB3_01507	QSAINAVTGGPIAFG	3	INAVTGGPI	1	0	OmpA	0.289023	4.87	NA	0.615908	11.37	WB
130	BoLA-DRB3_01507	VRSLDFSSAEPVFTA	3	LDFSSAEPV	1	0	OmpA	0.28596	4.94	NA	0.624012	10.36	WB
183	BoLA-DRB3_01601	WPDMKIVNNIEVTGQ	3	MKIVNNIEV	1	0	OmpA	0.795301	0.42	NA	0.427521	11.86	SB
244	BoLA-DRB3_01601	ADKLKACPDARVTIN	3	LKACPDARV	1	0	OmpA	0.764174	0.51	NA	0.51949	3.31	SB
243	BoLA-DRB3_01601	VADKLKACPDARVTI	4	LKACPDARV	1	0	OmpA	0.703153	0.72	NA	0.513298	3.66	SB
182	BoLA-DRB3_01601	TWPDMKIVNNIEVTG	4	MKIVNNIEV	1	0	OmpA	0.699508	0.74	NA	0.403531	15.43	SB
184	BoLA-DRB3_01601	PDMKIVNNIEVTGQA	2	MKIVNNIEV	0.96	0	OmpA	0.684482	0.8	NA	0.421328	12.73	SB
150	BoLA-DRB3_01601	DFGLKVERDTVTLTG	3	LKVERDTVT	1	0	OmpA	0.673737	0.85	NA	0.423117	12.47	SB
242	BoLA-DRB3_01601	RVADKLKACPDARVT	5	LKACPDARV	1	0	OmpA	0.613887	1.09	NA	0.475505	6.46	WB
149	BoLA-DRB3_01601	PDFGLKVERDTVTLT	4	LKVERDTVT	1	0	OmpA	0.582564	1.23	NA	0.417308	13.32	WB
280	BoLA-DRB3_01601	IVADYLVARGVAGDH	4	YLVARGVAG	1	0	OmpA	0.581063	1.24	NA	0.570452	1.36	WB
281	BoLA-DRB3_01601	VADYLVARGVAGDHI	3	YLVARGVAG	1	0	OmpA	0.558655	1.35	NA	0.564551	1.52	WB
120	BoLA-DRB3_01601	VIDQIHVDPVVRSLD	4	IHVDPVVRS	1	0	OmpA	0.465129	1.94	NA	0.468172	7.07	WB
121	BoLA-DRB3_01601	IDQIHVDPVVRSLDF	3	IHVDPVVRS	1	0	OmpA	0.462253	1.96	NA	0.483367	5.75	WB
181	BoLA-DRB3_01601	STWPDMKIVNNIEVT	5	MKIVNNIEV	1	0	OmpA	0.457251	2	NA	0.379383	19.7	WB
245	BoLA-DRB3_01601	DKLKACPDARVTING	2	LKACPDARV	1	0	OmpA	0.445617	2.09	NA	0.477003	6.32	WB
279	BoLA-DRB3_01601	KIVADYLVARGVAGD	5	YLVARGVAG	1	0	OmpA	0.420694	2.3	NA	0.56419	1.53	WB
148	BoLA-DRB3_01601	IPDFGLKVERDTVTL	5	LKVERDTVT	1	0	OmpA	0.379995	2.66	NA	0.381114	19.37	WB
282	BoLA-DRB3_01601	ADYLVARGVAGDHIA	2	YLVARGVAG	1	0	OmpA	0.319632	3.36	NA	0.53332	2.63	WB
126	BoLA-DRB3_01601	VDPVVRSLDFSSAEP	3	VVRSLDFSS	0.99	0	OmpA	0.318827	3.37	NA	0.424746	12.24	WB
103	BoLA-DRB3_01601	KAALMTALNGLLAPG	3	LMTALNGLL	0.97	0	OmpA	0.311372	3.47	NA	0.508904	3.92	WB
151	BoLA-DRB3_01601	FGLKVERDTVTLTGT	2	LKVERDTVT	0.97	0	OmpA	0.28196	3.87	NA	0.405354	15.14	WB
119	BoLA-DRB3_01601	NVIDQIHVDPVVRSL	5	IHVDPVVRS	0.88	0	OmpA	0.279099	3.91	NA	0.474747	6.53	WB
185	BoLA-DRB3_01601	DMKIVNNIEVTGQAP	3	IVNNIEVTG	0.65	0	OmpA	0.248231	4.44	NA	0.392564	17.27	WB
122	BoLA-DRB3_01601	DQIHVDPVVRSLDFS	2	IHVDPVVRS	1	0	OmpA	0.240645	4.59	NA	0.442967	9.83	WB
275	BoLA-DRB3_01601	AQRAKIVADYLVARG	3	AKIVADYLV	0.93	0	OmpA	0.236615	4.68	NA	0.458252	8.09	WB
125	BoLA-DRB3_01601	HVDPVVRSLDFSSAE	4	VVRSLDFSS	1	0	OmpA	0.224324	4.95	NA	0.41873	13.1	WB
183	BoLA-DRB3_01602	WPDMKIVNNIEVTGQ	3	MKIVNNIEV	0.98	0	OmpA	0.576663	0.55	NA	0.410526	9.44	SB
182	BoLA-DRB3_01602	TWPDMKIVNNIEVTG	4	MKIVNNIEV	0.99	0	OmpA	0.489703	0.94	NA	0.391633	12.34	SB
184	BoLA-DRB3_01602	PDMKIVNNIEVTGQA	2	MKIVNNIEV	0.91	0	OmpA	0.459323	1.11	NA	0.406637	10.02	WB
120	BoLA-DRB3_01602	VIDQIHVDPVVRSLD	4	IHVDPVVRS	0.97	0	OmpA	0.417849	1.4	NA	0.475389	3.24	WB
121	BoLA-DRB3_01602	IDQIHVDPVVRSLDF	3	IHVDPVVRS	1	0	OmpA	0.409848	1.45	NA	0.479918	2.98	WB
280	BoLA-DRB3_01602	IVADYLVARGVAGDH	4	YLVARGVAG	1	0	OmpA	0.347213	1.98	NA	0.459379	4.3	WB
244	BoLA-DRB3_01602	ADKLKACPDARVTIN	3	LKACPDARV	1	0	OmpA	0.337877	2.09	NA	0.405928	10.12	WB
281	BoLA-DRB3_01602	VADYLVARGVAGDHI	3	YLVARGVAG	1	0	OmpA	0.335229	2.12	NA	0.452852	4.82	WB
119	BoLA-DRB3_01602	NVIDQIHVDPVVRSL	5	IHVDPVVRS	0.73	0	OmpA	0.325966	2.23	NA	0.493028	2.32	WB
181	BoLA-DRB3_01602	STWPDMKIVNNIEVT	5	MKIVNNIEV	1	0	OmpA	0.313822	2.38	NA	0.374319	15.42	WB
118	BoLA-DRB3_01602	VNVIDQIHVDPVVRS	3	IDQIHVDPV	0.64	0	OmpA	0.290533	2.7	NA	0.464014	3.95	WB
243	BoLA-DRB3_01602	VADKLKACPDARVTI	4	LKACPDARV	1	0	OmpA	0.287872	2.74	NA	0.401974	10.71	WB
150	BoLA-DRB3_01602	DFGLKVERDTVTLTG	3	LKVERDTVT	0.99	0	OmpA	0.284764	2.79	NA	0.3671	16.88	WB
279	BoLA-DRB3_01602	KIVADYLVARGVAGD	5	YLVARGVAG	0.98	0	OmpA	0.246097	3.47	NA	0.472118	3.43	WB
122	BoLA-DRB3_01602	DQIHVDPVVRSLDFS	2	IHVDPVVRS	1	0	OmpA	0.236469	3.66	NA	0.432416	6.76	WB
242	BoLA-DRB3_01602	RVADKLKACPDARVT	5	LKACPDARV	1	0	OmpA	0.235936	3.67	NA	0.373008	15.67	WB
149	BoLA-DRB3_01602	PDFGLKVERDTVTLT	4	LKVERDTVT	1	0	OmpA	0.225421	3.88	NA	0.361417	18.07	WB
117	BoLA-DRB3_01602	GVNVIDQIHVDPVVR	4	IDQIHVDPV	0.97	0	OmpA	0.201333	4.49	NA	0.363966	17.53	WB
103	BoLA-DRB3_01602	KAALMTALNGLLAPG	3	LMTALNGLL	0.94	0	OmpA	0.198009	4.58	NA	0.437468	6.24	WB
183	BoLA-DRB3_01603	WPDMKIVNNIEVTGQ	3	MKIVNNIEV	0.99	0	OmpA	0.633289	0.81	NA	0.390156	20.95	SB
182	BoLA-DRB3_01603	TWPDMKIVNNIEVTG	4	MKIVNNIEV	1	0	OmpA	0.530789	1.32	NA	0.37117	24.82	WB
184	BoLA-DRB3_01603	PDMKIVNNIEVTGQA	2	MKIVNNIEV	0.94	0	OmpA	0.504591	1.5	NA	0.38308	22.34	WB
254	BoLA-DRB3_01603	RVTINGYTDNTGSEG	3	INGYTDNTG	1	0	OmpA	0.47336	1.73	NA	0.244212	58.18	WB
280	BoLA-DRB3_01603	IVADYLVARGVAGDH	4	YLVARGVAG	1	0	OmpA	0.40346	2.38	NA	0.521935	4.01	WB
253	BoLA-DRB3_01603	ARVTINGYTDNTGSE	4	INGYTDNTG	1	0	OmpA	0.392042	2.5	NA	0.260392	53.54	WB
91	BoLA-DRB3_01603	VTLIGDFPDEAAKAA	3	IGDFPDEAA	1	0	OmpA	0.382443	2.62	NA	0.317041	37.85	WB
281	BoLA-DRB3_01603	VADYLVARGVAGDHI	3	YLVARGVAG	0.99	0	OmpA	0.380008	2.65	NA	0.521916	4.01	WB
244	BoLA-DRB3_01603	ADKLKACPDARVTIN	3	LKACPDARV	1	0	OmpA	0.378614	2.66	NA	0.420104	15.51	WB
90	BoLA-DRB3_01603	TVTLIGDFPDEAAKA	4	IGDFPDEAA	0.99	0	OmpA	0.316955	3.5	NA	0.31634	38.03	WB
181	BoLA-DRB3_01603	STWPDMKIVNNIEVT	5	MKIVNNIEV	1	0	OmpA	0.316435	3.5	NA	0.355783	28.25	WB
243	BoLA-DRB3_01603	VADKLKACPDARVTI	4	LKACPDARV	1	0	OmpA	0.315052	3.53	NA	0.420403	15.46	WB
279	BoLA-DRB3_01603	KIVADYLVARGVAGD	5	YLVARGVAG	0.92	0	OmpA	0.268788	4.35	NA	0.529706	3.53	WB
234	BoLA-DRB3_01603	PADYEILNRVADKLK	3	YEILNRVAD	0.85	0	OmpA	0.257339	4.58	NA	0.366336	25.87	WB
242	BoLA-DRB3_01603	RVADKLKACPDARVT	5	LKACPDARV	1	0	OmpA	0.24728	4.83	NA	0.393721	20.26	WB
252	BoLA-DRB3_01603	DARVTINGYTDNTGS	5	INGYTDNTG	1	0	OmpA	0.242142	4.96	NA	0.265276	52.13	WB
29	BoLA-DRB3_01701	RPWLIGAVVIPLLIA	3	LIGAVVIPL	0.94	0	OmpA	0.325773	1.3	NA	0.695197	0.15	WB
130	BoLA-DRB3_01701	VRSLDFSSAEPVFTA	3	LDFSSAEPV	0.84	0	OmpA	0.304455	1.6	NA	0.571576	2.35	WB
118	BoLA-DRB3_01701	VNVIDQIHVDPVVRS	3	IDQIHVDPV	0.92	0	OmpA	0.300629	1.65	NA	0.564557	2.6	WB
28	BoLA-DRB3_01701	GRPWLIGAVVIPLLI	4	LIGAVVIPL	0.96	0	OmpA	0.252854	2.47	NA	0.682682	0.22	WB
129	BoLA-DRB3_01701	VVRSLDFSSAEPVFT	4	LDFSSAEPV	0.98	0	OmpA	0.239427	2.78	NA	0.560592	2.77	WB
117	BoLA-DRB3_01701	GVNVIDQIHVDPVVR	4	IDQIHVDPV	0.97	0	OmpA	0.238447	2.81	NA	0.473913	8.38	WB
229	BoLA-DRB3_01701	GASLIPADYEILNRV	3	LIPADYEIL	0.98	0	OmpA	0.22057	3.28	NA	0.425174	13.92	WB
183	BoLA-DRB3_01701	WPDMKIVNNIEVTGQ	3	MKIVNNIEV	0.86	0	OmpA	0.220504	3.29	NA	0.513734	5.21	WB
131	BoLA-DRB3_01701	RSLDFSSAEPVFTAS	2	LDFSSAEPV	0.55	0	OmpA	0.218984	3.33	NA	0.532666	4.03	WB
228	BoLA-DRB3_01701	DGASLIPADYEILNR	4	LIPADYEIL	0.99	0	OmpA	0.206552	3.74	NA	0.385267	19.94	WB
27	BoLA-DRB3_01701	PGRPWLIGAVVIPLL	5	LIGAVVIPL	0.98	0	OmpA	0.189191	4.4	NA	0.656978	0.46	WB
119	BoLA-DRB3_01701	NVIDQIHVDPVVRSL	2	IDQIHVDPV	0.72	0	OmpA	0.178123	4.87	NA	0.569189	2.43	WB
29	BoLA-DRB3_01702	RPWLIGAVVIPLLIA	3	LIGAVVIPL	0.97	0	OmpA	0.3847	1.15	NA	0.722785	0.18	WB
130	BoLA-DRB3_01702	VRSLDFSSAEPVFTA	3	LDFSSAEPV	0.92	0	OmpA	0.368102	1.3	NA	0.623159	1.9	WB
118	BoLA-DRB3_01702	VNVIDQIHVDPVVRS	3	IDQIHVDPV	0.97	0	OmpA	0.327005	1.77	NA	0.574863	3.94	WB
28	BoLA-DRB3_01702	GRPWLIGAVVIPLLI	4	LIGAVVIPL	0.98	0	OmpA	0.321142	1.84	NA	0.712448	0.25	WB
281	BoLA-DRB3_01702	VADYLVARGVAGDHI	3	YLVARGVAG	1	0	OmpA	0.311517	2	NA	0.402373	23.36	WB
280	BoLA-DRB3_01702	IVADYLVARGVAGDH	4	YLVARGVAG	0.99	0	OmpA	0.304766	2.12	NA	0.430439	18.72	WB
183	BoLA-DRB3_01702	WPDMKIVNNIEVTGQ	3	MKIVNNIEV	0.94	0	OmpA	0.289535	2.39	NA	0.515296	8.28	WB
129	BoLA-DRB3_01702	VVRSLDFSSAEPVFT	4	LDFSSAEPV	1	0	OmpA	0.288997	2.4	NA	0.607697	2.43	WB
131	BoLA-DRB3_01702	RSLDFSSAEPVFTAS	2	LDFSSAEPV	0.55	0	OmpA	0.273449	2.71	NA	0.592569	3.07	WB
117	BoLA-DRB3_01702	GVNVIDQIHVDPVVR	4	IDQIHVDPV	0.99	0	OmpA	0.26268	2.94	NA	0.487019	11.22	WB
27	BoLA-DRB3_01702	PGRPWLIGAVVIPLL	5	LIGAVVIPL	0.99	0	OmpA	0.26004	3	NA	0.692073	0.45	WB
182	BoLA-DRB3_01702	TWPDMKIVNNIEVTG	4	MKIVNNIEV	0.96	0	OmpA	0.226089	3.94	NA	0.504144	9.39	WB
184	BoLA-DRB3_01702	PDMKIVNNIEVTGQA	2	MKIVNNIEV	0.85	0	OmpA	0.219901	4.14	NA	0.510274	8.77	WB
279	BoLA-DRB3_01702	KIVADYLVARGVAGD	5	YLVARGVAG	0.84	0	OmpA	0.215255	4.28	NA	0.483104	11.66	WB
138	BoLA-DRB3_01702	AEPVFTASVPIPDFG	4	FTASVPIPD	0.79	0	OmpA	0.213527	4.34	NA	0.500696	9.74	WB
30	BoLA-DRB3_01702	PWLIGAVVIPLLIAA	2	LIGAVVIPL	0.74	0	OmpA	0.210588	4.43	NA	0.684891	0.54	WB
128	BoLA-DRB3_01702	PVVRSLDFSSAEPVF	5	LDFSSAEPV	0.99	0	OmpA	0.204396	4.65	NA	0.590323	3.18	WB
139	BoLA-DRB3_01702	EPVFTASVPIPDFGL	3	FTASVPIPD	0.91	0	OmpA	0.198366	4.88	NA	0.490592	10.82	WB
235	BoLA-DRB3_01702	ADYEILNRVADKLKA	4	ILNRVADKL	0.84	0	OmpA	0.197195	4.93	NA	0.437209	17.67	WB
29	BoLA-DRB3_01703	RPWLIGAVVIPLLIA	3	LIGAVVIPL	0.94	0	OmpA	0.400459	1.37	NA	0.770047	0.06	WB
281	BoLA-DRB3_01703	VADYLVARGVAGDHI	3	YLVARGVAG	0.97	0	OmpA	0.357651	1.89	NA	0.474317	21.97	WB
280	BoLA-DRB3_01703	IVADYLVARGVAGDH	4	YLVARGVAG	0.99	0	OmpA	0.354801	1.93	NA	0.515659	15.14	WB
183	BoLA-DRB3_01703	WPDMKIVNNIEVTGQ	3	MKIVNNIEV	0.93	0	OmpA	0.35449	1.94	NA	0.544378	11.16	WB
28	BoLA-DRB3_01703	GRPWLIGAVVIPLLI	4	LIGAVVIPL	0.94	0	OmpA	0.341435	2.16	NA	0.759792	0.09	WB
118	BoLA-DRB3_01703	VNVIDQIHVDPVVRS	3	IDQIHVDPV	0.82	0	OmpA	0.296301	3.1	NA	0.619972	3.97	WB
27	BoLA-DRB3_01703	PGRPWLIGAVVIPLL	5	LIGAVVIPL	0.96	0	OmpA	0.284179	3.4	NA	0.738332	0.24	WB
182	BoLA-DRB3_01703	TWPDMKIVNNIEVTG	4	MKIVNNIEV	0.95	0	OmpA	0.283928	3.41	NA	0.528185	13.36	WB
130	BoLA-DRB3_01703	VRSLDFSSAEPVFTA	3	LDFSSAEPV	0.78	0	OmpA	0.282215	3.45	NA	0.667074	1.71	WB
184	BoLA-DRB3_01703	PDMKIVNNIEVTGQA	2	MKIVNNIEV	0.77	0	OmpA	0.274365	3.68	NA	0.538872	11.89	WB
279	BoLA-DRB3_01703	KIVADYLVARGVAGD	5	YLVARGVAG	0.82	0	OmpA	0.269937	3.81	NA	0.555633	9.8	WB
138	BoLA-DRB3_01703	AEPVFTASVPIPDFG	4	FTASVPIPD	0.88	0	OmpA	0.251458	4.41	NA	0.567933	8.42	WB
234	BoLA-DRB3_01704	PADYEILNRVADKLK	3	YEILNRVAD	0.86	0	OmpA	0.380028	0.99	NA	0.344499	21.72	SB
233	BoLA-DRB3_01704	IPADYEILNRVADKL	4	YEILNRVAD	0.91	0	OmpA	0.279813	2.4	NA	0.329606	24.69	WB
183	BoLA-DRB3_01704	WPDMKIVNNIEVTGQ	3	MKIVNNIEV	0.85	0	OmpA	0.271854	2.57	NA	0.491712	3.93	WB
232	BoLA-DRB3_01704	LIPADYEILNRVADK	5	YEILNRVAD	0.91	0	OmpA	0.267235	2.68	NA	0.298841	31.66	WB
29	BoLA-DRB3_01704	RPWLIGAVVIPLLIA	3	LIGAVVIPL	0.84	0	OmpA	0.257328	2.92	NA	0.658317	0.11	WB
118	BoLA-DRB3_01704	VNVIDQIHVDPVVRS	3	IDQIHVDPV	0.9	0	OmpA	0.232625	3.6	NA	0.518537	2.59	WB
235	BoLA-DRB3_01704	ADYEILNRVADKLKA	2	YEILNRVAD	0.54	0	OmpA	0.224245	3.87	NA	0.358239	19.1	WB
28	BoLA-DRB3_01704	GRPWLIGAVVIPLLI	4	LIGAVVIPL	0.86	0	OmpA	0.209372	4.44	NA	0.649328	0.15	WB
184	BoLA-DRB3_01704	PDMKIVNNIEVTGQA	2	MKIVNNIEV	0.72	0	OmpA	0.207355	4.53	NA	0.487785	4.16	WB
182	BoLA-DRB3_01704	TWPDMKIVNNIEVTG	4	MKIVNNIEV	0.95	0	OmpA	0.205933	4.59	NA	0.486428	4.24	WB
29	BoLA-DRB3_01801	RPWLIGAVVIPLLIA	3	LIGAVVIPL	0.94	0	OmpA	0.817158	0.29	NA	0.802108	0.01	SB
28	BoLA-DRB3_01801	GRPWLIGAVVIPLLI	4	LIGAVVIPL	0.98	0	OmpA	0.782931	0.36	NA	0.801123	0.01	SB
27	BoLA-DRB3_01801	PGRPWLIGAVVIPLL	5	LIGAVVIPL	0.99	0	OmpA	0.778734	0.37	NA	0.796264	0.01	SB
118	BoLA-DRB3_01801	VNVIDQIHVDPVVRS	3	IDQIHVDPV	0.99	0	OmpA	0.680837	0.67	NA	0.591789	3.56	SB
117	BoLA-DRB3_01801	GVNVIDQIHVDPVVR	4	IDQIHVDPV	1	0	OmpA	0.651272	0.77	NA	0.565398	5.15	SB
130	BoLA-DRB3_01801	VRSLDFSSAEPVFTA	3	LDFSSAEPV	0.99	0	OmpA	0.643478	0.8	NA	0.638987	1.6	SB
26	BoLA-DRB3_01801	SPGRPWLIGAVVIPL	6	LIGAVVIPL	1	0	OmpA	0.614118	0.92	NA	0.770566	0.02	SB
291	BoLA-DRB3_01801	AGDHIATVGLGSVNP	4	IATVGLGSV	1	0	OmpA	0.606544	0.96	NA	0.443732	18.92	SB
292	BoLA-DRB3_01801	GDHIATVGLGSVNPI	3	IATVGLGSV	1	0	OmpA	0.599555	0.99	NA	0.514354	9.58	SB
129	BoLA-DRB3_01801	VVRSLDFSSAEPVFT	4	LDFSSAEPV	1	0	OmpA	0.588153	1.05	NA	0.635375	1.72	WB
30	BoLA-DRB3_01801	PWLIGAVVIPLLIAA	2	LIGAVVIPL	0.57	0	OmpA	0.572297	1.14	NA	0.777026	0.01	WB
116	BoLA-DRB3_01801	PGVNVIDQIHVDPVV	5	IDQIHVDPV	0.83	0	OmpA	0.554435	1.25	NA	0.555933	5.89	WB
229	BoLA-DRB3_01801	GASLIPADYEILNRV	3	LIPADYEIL	0.99	0	OmpA	0.521459	1.44	NA	0.498397	11.35	WB
228	BoLA-DRB3_01801	DGASLIPADYEILNR	4	LIPADYEIL	1	0	OmpA	0.5197	1.45	NA	0.445443	18.65	WB
128	BoLA-DRB3_01801	PVVRSLDFSSAEPVF	5	LDFSSAEPV	0.99	0	OmpA	0.493241	1.61	NA	0.62066	2.24	WB
212	BoLA-DRB3_01801	QSAINAVTGGPIAFG	3	INAVTGGPI	1	0	OmpA	0.474143	1.74	NA	0.551238	6.24	WB
115	BoLA-DRB3_01801	APGVNVIDQIHVDPV	3	VNVIDQIHV	0.57	0	OmpA	0.468161	1.79	NA	0.524666	8.51	WB
290	BoLA-DRB3_01801	VAGDHIATVGLGSVN	5	IATVGLGSV	1	0	OmpA	0.451904	1.91	NA	0.455667	17.04	WB
119	BoLA-DRB3_01801	NVIDQIHVDPVVRSL	2	IDQIHVDPV	0.95	0	OmpA	0.447867	1.94	NA	0.555512	5.93	WB
102	BoLA-DRB3_01801	AKAALMTALNGLLAP	4	LMTALNGLL	0.64	0	OmpA	0.445137	1.96	NA	0.670794	0.84	WB
103	BoLA-DRB3_01801	KAALMTALNGLLAPG	3	LMTALNGLL	0.88	0	OmpA	0.423395	2.16	NA	0.644989	1.42	WB
211	BoLA-DRB3_01801	LQSAINAVTGGPIAF	4	INAVTGGPI	1	0	OmpA	0.414382	2.26	NA	0.572417	4.68	WB
227	BoLA-DRB3_01801	NDGASLIPADYEILN	5	LIPADYEIL	1	0	OmpA	0.394386	2.46	NA	0.435495	20.27	WB
131	BoLA-DRB3_01801	RSLDFSSAEPVFTAS	2	LDFSSAEPV	0.98	0	OmpA	0.393615	2.47	NA	0.597864	3.25	WB
210	BoLA-DRB3_01801	DLQSAINAVTGGPIA	5	INAVTGGPI	0.99	0	OmpA	0.37353	2.69	NA	0.557515	5.76	WB
183	BoLA-DRB3_01801	WPDMKIVNNIEVTGQ	3	MKIVNNIEV	0.97	0	OmpA	0.340607	3.09	NA	0.499266	11.24	WB
293	BoLA-DRB3_01801	DHIATVGLGSVNPIA	2	IATVGLGSV	0.87	0	OmpA	0.322621	3.34	NA	0.517671	9.24	WB
114	BoLA-DRB3_01801	LAPGVNVIDQIHVDP	4	VNVIDQIHV	1	0	OmpA	0.314008	3.46	NA	0.405939	25.54	WB
101	BoLA-DRB3_01801	AAKAALMTALNGLLA	5	LMTALNGLL	0.54	0	OmpA	0.287224	3.91	NA	0.664892	0.96	WB
182	BoLA-DRB3_01801	TWPDMKIVNNIEVTG	4	MKIVNNIEV	1	0	OmpA	0.285249	3.95	NA	0.493267	11.96	WB
127	BoLA-DRB3_01801	DPVVRSLDFSSAEPV	6	LDFSSAEPV	0.89	0	OmpA	0.275738	4.13	NA	0.581737	4.1	WB
230	BoLA-DRB3_01801	ASLIPADYEILNRVA	2	LIPADYEIL	0.92	0	OmpA	0.273035	4.18	NA	0.479277	13.7	WB
184	BoLA-DRB3_01801	PDMKIVNNIEVTGQA	2	MKIVNNIEV	0.93	0	OmpA	0.246797	4.73	NA	0.484671	13.02	WB
29	BoLA-DRB3_01802	RPWLIGAVVIPLLIA	3	LIGAVVIPL	0.84	0	OmpA	0.605296	0.27	NA	0.847923	0.01	SB
28	BoLA-DRB3_01802	GRPWLIGAVVIPLLI	4	LIGAVVIPL	0.89	0	OmpA	0.546333	0.44	NA	0.839195	0.03	SB
27	BoLA-DRB3_01802	PGRPWLIGAVVIPLL	5	LIGAVVIPL	0.96	0	OmpA	0.511353	0.57	NA	0.831233	0.04	SB
183	BoLA-DRB3_01802	WPDMKIVNNIEVTGQ	3	MKIVNNIEV	0.96	0	OmpA	0.497545	0.63	NA	0.575431	18.24	SB
182	BoLA-DRB3_01802	TWPDMKIVNNIEVTG	4	MKIVNNIEV	0.99	0	OmpA	0.440028	0.97	NA	0.56468	20.04	SB
115	BoLA-DRB3_01802	APGVNVIDQIHVDPV	3	VNVIDQIHV	0.88	0	OmpA	0.421514	1.1	NA	0.588176	16.25	WB
114	BoLA-DRB3_01802	LAPGVNVIDQIHVDP	4	VNVIDQIHV	1	0	OmpA	0.410358	1.18	NA	0.533308	25.65	WB
30	BoLA-DRB3_01802	PWLIGAVVIPLLIAA	2	LIGAVVIPL	0.58	0	OmpA	0.385278	1.39	NA	0.826955	0.05	WB
184	BoLA-DRB3_01802	PDMKIVNNIEVTGQA	2	MKIVNNIEV	0.91	0	OmpA	0.375353	1.49	NA	0.562099	20.48	WB
118	BoLA-DRB3_01802	VNVIDQIHVDPVVRS	3	IDQIHVDPV	0.9	0	OmpA	0.369136	1.57	NA	0.659656	7.16	WB
26	BoLA-DRB3_01802	SPGRPWLIGAVVIPL	6	LIGAVVIPL	1	0	OmpA	0.341267	1.91	NA	0.80213	0.21	WB
212	BoLA-DRB3_01802	QSAINAVTGGPIAFG	3	INAVTGGPI	1	0	OmpA	0.321778	2.2	NA	0.624829	11.08	WB
117	BoLA-DRB3_01802	GVNVIDQIHVDPVVR	4	IDQIHVDPV	0.97	0	OmpA	0.318908	2.24	NA	0.627034	10.81	WB
181	BoLA-DRB3_01802	STWPDMKIVNNIEVT	5	MKIVNNIEV	0.98	0	OmpA	0.318734	2.24	NA	0.563777	20.19	WB
291	BoLA-DRB3_01802	AGDHIATVGLGSVNP	4	IATVGLGSV	1	0	OmpA	0.301332	2.5	NA	0.54676	23.18	WB
116	BoLA-DRB3_01802	PGVNVIDQIHVDPVV	5	IDQIHVDPV	0.44	0	OmpA	0.293313	2.65	NA	0.617554	12.01	WB
292	BoLA-DRB3_01802	GDHIATVGLGSVNPI	3	IATVGLGSV	0.98	0	OmpA	0.282451	2.84	NA	0.599759	14.48	WB
103	BoLA-DRB3_01802	KAALMTALNGLLAPG	3	LMTALNGLL	0.95	0	OmpA	0.273382	3.01	NA	0.698116	3.84	WB
211	BoLA-DRB3_01802	LQSAINAVTGGPIAF	4	INAVTGGPI	1	0	OmpA	0.270764	3.06	NA	0.635539	9.77	WB
113	BoLA-DRB3_01802	LLAPGVNVIDQIHVD	5	VNVIDQIHV	0.99	0	OmpA	0.263441	3.21	NA	0.592977	15.51	WB
228	BoLA-DRB3_01802	DGASLIPADYEILNR	4	LIPADYEIL	1	0	OmpA	0.259233	3.29	NA	0.489786	34.08	WB
229	BoLA-DRB3_01802	GASLIPADYEILNRV	3	LIPADYEIL	0.99	0	OmpA	0.256738	3.34	NA	0.524009	27.45	WB
130	BoLA-DRB3_01802	VRSLDFSSAEPVFTA	3	LDFSSAEPV	0.99	0	OmpA	0.250971	3.46	NA	0.649497	8.24	WB
210	BoLA-DRB3_01802	DLQSAINAVTGGPIA	5	INAVTGGPI	1	0	OmpA	0.246575	3.56	NA	0.624407	11.14	WB
34	BoLA-DRB3_01802	GAVVIPLLIAAIGYG	3	VIPLLIAAI	0.97	0	OmpA	0.240145	3.74	NA	0.689083	4.49	WB
102	BoLA-DRB3_01802	AKAALMTALNGLLAP	4	LMTALNGLL	0.87	0	OmpA	0.228514	4.06	NA	0.714686	2.78	WB
235	BoLA-DRB3_01802	ADYEILNRVADKLKA	4	ILNRVADKL	0.91	0	OmpA	0.226789	4.11	NA	0.571455	18.88	WB
234	BoLA-DRB3_01802	PADYEILNRVADKLK	5	ILNRVADKL	0.65	0	OmpA	0.216675	4.42	NA	0.555767	21.58	WB
129	BoLA-DRB3_01802	VVRSLDFSSAEPVFT	4	LDFSSAEPV	0.99	0	OmpA	0.209831	4.64	NA	0.65979	7.15	WB
137	BoLA-DRB3_01802	SAEPVFTASVPIPDF	3	PVFTASVPI	0.68	0	OmpA	0.206484	4.76	NA	0.597519	14.82	WB
136	BoLA-DRB3_01802	SSAEPVFTASVPIPD	4	PVFTASVPI	0.81	0	OmpA	0.201693	4.93	NA	0.561467	20.59	WB
29	BoLA-DRB3_01803	RPWLIGAVVIPLLIA	3	LIGAVVIPL	0.94	0	OmpA	0.817158	0.29	NA	0.802108	0.01	SB
28	BoLA-DRB3_01803	GRPWLIGAVVIPLLI	4	LIGAVVIPL	0.98	0	OmpA	0.782931	0.36	NA	0.801123	0.01	SB
27	BoLA-DRB3_01803	PGRPWLIGAVVIPLL	5	LIGAVVIPL	0.99	0	OmpA	0.778734	0.37	NA	0.796264	0.01	SB
118	BoLA-DRB3_01803	VNVIDQIHVDPVVRS	3	IDQIHVDPV	0.99	0	OmpA	0.680837	0.67	NA	0.591789	3.56	SB
117	BoLA-DRB3_01803	GVNVIDQIHVDPVVR	4	IDQIHVDPV	1	0	OmpA	0.651272	0.77	NA	0.565398	5.15	SB
130	BoLA-DRB3_01803	VRSLDFSSAEPVFTA	3	LDFSSAEPV	0.99	0	OmpA	0.643478	0.8	NA	0.638987	1.6	SB
26	BoLA-DRB3_01803	SPGRPWLIGAVVIPL	6	LIGAVVIPL	1	0	OmpA	0.614118	0.92	NA	0.770566	0.02	SB
291	BoLA-DRB3_01803	AGDHIATVGLGSVNP	4	IATVGLGSV	1	0	OmpA	0.606544	0.96	NA	0.443732	18.92	SB
292	BoLA-DRB3_01803	GDHIATVGLGSVNPI	3	IATVGLGSV	1	0	OmpA	0.599555	0.99	NA	0.514354	9.58	SB
129	BoLA-DRB3_01803	VVRSLDFSSAEPVFT	4	LDFSSAEPV	1	0	OmpA	0.588153	1.05	NA	0.635375	1.72	WB
30	BoLA-DRB3_01803	PWLIGAVVIPLLIAA	2	LIGAVVIPL	0.57	0	OmpA	0.572297	1.14	NA	0.777026	0.01	WB
116	BoLA-DRB3_01803	PGVNVIDQIHVDPVV	5	IDQIHVDPV	0.83	0	OmpA	0.554435	1.25	NA	0.555933	5.89	WB
229	BoLA-DRB3_01803	GASLIPADYEILNRV	3	LIPADYEIL	0.99	0	OmpA	0.521459	1.44	NA	0.498397	11.35	WB
228	BoLA-DRB3_01803	DGASLIPADYEILNR	4	LIPADYEIL	1	0	OmpA	0.5197	1.45	NA	0.445443	18.65	WB
128	BoLA-DRB3_01803	PVVRSLDFSSAEPVF	5	LDFSSAEPV	0.99	0	OmpA	0.493241	1.61	NA	0.62066	2.24	WB
212	BoLA-DRB3_01803	QSAINAVTGGPIAFG	3	INAVTGGPI	1	0	OmpA	0.474143	1.74	NA	0.551238	6.24	WB
115	BoLA-DRB3_01803	APGVNVIDQIHVDPV	3	VNVIDQIHV	0.57	0	OmpA	0.468161	1.79	NA	0.524666	8.51	WB
290	BoLA-DRB3_01803	VAGDHIATVGLGSVN	5	IATVGLGSV	1	0	OmpA	0.451904	1.91	NA	0.455667	17.04	WB
119	BoLA-DRB3_01803	NVIDQIHVDPVVRSL	2	IDQIHVDPV	0.95	0	OmpA	0.447867	1.94	NA	0.555512	5.93	WB
102	BoLA-DRB3_01803	AKAALMTALNGLLAP	4	LMTALNGLL	0.64	0	OmpA	0.445137	1.96	NA	0.670794	0.84	WB
103	BoLA-DRB3_01803	KAALMTALNGLLAPG	3	LMTALNGLL	0.88	0	OmpA	0.423395	2.16	NA	0.644989	1.42	WB
211	BoLA-DRB3_01803	LQSAINAVTGGPIAF	4	INAVTGGPI	1	0	OmpA	0.414382	2.26	NA	0.572417	4.68	WB
227	BoLA-DRB3_01803	NDGASLIPADYEILN	5	LIPADYEIL	1	0	OmpA	0.394386	2.46	NA	0.435495	20.27	WB
131	BoLA-DRB3_01803	RSLDFSSAEPVFTAS	2	LDFSSAEPV	0.98	0	OmpA	0.393615	2.47	NA	0.597864	3.25	WB
210	BoLA-DRB3_01803	DLQSAINAVTGGPIA	5	INAVTGGPI	0.99	0	OmpA	0.37353	2.69	NA	0.557515	5.76	WB
183	BoLA-DRB3_01803	WPDMKIVNNIEVTGQ	3	MKIVNNIEV	0.97	0	OmpA	0.340607	3.09	NA	0.499266	11.24	WB
293	BoLA-DRB3_01803	DHIATVGLGSVNPIA	2	IATVGLGSV	0.87	0	OmpA	0.322621	3.34	NA	0.517671	9.24	WB
114	BoLA-DRB3_01803	LAPGVNVIDQIHVDP	4	VNVIDQIHV	1	0	OmpA	0.314008	3.46	NA	0.405939	25.54	WB
101	BoLA-DRB3_01803	AAKAALMTALNGLLA	5	LMTALNGLL	0.54	0	OmpA	0.287224	3.91	NA	0.664892	0.96	WB
182	BoLA-DRB3_01803	TWPDMKIVNNIEVTG	4	MKIVNNIEV	1	0	OmpA	0.285249	3.95	NA	0.493267	11.96	WB
127	BoLA-DRB3_01803	DPVVRSLDFSSAEPV	6	LDFSSAEPV	0.89	0	OmpA	0.275738	4.13	NA	0.581737	4.1	WB
230	BoLA-DRB3_01803	ASLIPADYEILNRVA	2	LIPADYEIL	0.92	0	OmpA	0.273035	4.18	NA	0.479277	13.7	WB
184	BoLA-DRB3_01803	PDMKIVNNIEVTGQA	2	MKIVNNIEV	0.93	0	OmpA	0.246797	4.73	NA	0.484671	13.02	WB
29	BoLA-DRB3_01804	RPWLIGAVVIPLLIA	3	LIGAVVIPL	0.95	0	OmpA	0.481861	0.28	NA	0.724389	0.01	SB
118	BoLA-DRB3_01804	VNVIDQIHVDPVVRS	3	IDQIHVDPV	0.99	0	OmpA	0.4177	0.46	NA	0.520659	3.65	SB
28	BoLA-DRB3_01804	GRPWLIGAVVIPLLI	4	LIGAVVIPL	0.97	0	OmpA	0.399653	0.52	NA	0.710164	0.01	SB
130	BoLA-DRB3_01804	VRSLDFSSAEPVFTA	3	LDFSSAEPV	1	0	OmpA	0.356692	0.74	NA	0.538037	2.68	SB
117	BoLA-DRB3_01804	GVNVIDQIHVDPVVR	4	IDQIHVDPV	0.97	0	OmpA	0.350254	0.77	NA	0.472762	7.45	SB
27	BoLA-DRB3_01804	PGRPWLIGAVVIPLL	5	LIGAVVIPL	0.97	0	OmpA	0.333466	0.88	NA	0.686116	0.04	SB
129	BoLA-DRB3_01804	VVRSLDFSSAEPVFT	4	LDFSSAEPV	1	0	OmpA	0.303703	1.14	NA	0.530679	3.06	WB
292	BoLA-DRB3_01804	GDHIATVGLGSVNPI	3	IATVGLGSV	0.97	0	OmpA	0.288092	1.31	NA	0.452034	9.75	WB
30	BoLA-DRB3_01804	PWLIGAVVIPLLIAA	2	LIGAVVIPL	0.55	0	OmpA	0.285643	1.33	NA	0.704022	0.01	WB
229	BoLA-DRB3_01804	GASLIPADYEILNRV	3	LIPADYEIL	1	0	OmpA	0.273788	1.46	NA	0.408619	16.07	WB
291	BoLA-DRB3_01804	AGDHIATVGLGSVNP	4	IATVGLGSV	1	0	OmpA	0.268682	1.51	NA	0.384617	20.38	WB
119	BoLA-DRB3_01804	NVIDQIHVDPVVRSL	2	IDQIHVDPV	0.89	0	OmpA	0.254981	1.69	NA	0.509562	4.35	WB
228	BoLA-DRB3_01804	DGASLIPADYEILNR	4	LIPADYEIL	1	0	OmpA	0.247531	1.8	NA	0.362012	24.96	WB
128	BoLA-DRB3_01804	PVVRSLDFSSAEPVF	5	LDFSSAEPV	0.96	0	OmpA	0.232014	2.04	NA	0.520178	3.67	WB
131	BoLA-DRB3_01804	RSLDFSSAEPVFTAS	2	LDFSSAEPV	0.92	0	OmpA	0.224098	2.2	NA	0.502725	4.82	WB
116	BoLA-DRB3_01804	PGVNVIDQIHVDPVV	5	IDQIHVDPV	0.76	0	OmpA	0.223584	2.21	NA	0.451039	9.87	WB
183	BoLA-DRB3_01804	WPDMKIVNNIEVTGQ	3	MKIVNNIEV	0.88	0	OmpA	0.208539	2.5	NA	0.443162	10.91	WB
115	BoLA-DRB3_01804	APGVNVIDQIHVDPV	3	VNVIDQIHV	0.74	0	OmpA	0.192276	2.91	NA	0.421107	14.03	WB
212	BoLA-DRB3_01804	QSAINAVTGGPIAFG	3	INAVTGGPI	0.99	0	OmpA	0.18321	3.16	NA	0.473011	7.42	WB
184	BoLA-DRB3_01804	PDMKIVNNIEVTGQA	2	MKIVNNIEV	0.76	0	OmpA	0.16399	3.78	NA	0.446664	10.44	WB
293	BoLA-DRB3_01804	DHIATVGLGSVNPIA	2	IATVGLGSV	0.75	0	OmpA	0.163904	3.78	NA	0.464833	8.27	WB
26	BoLA-DRB3_01804	SPGRPWLIGAVVIPL	6	LIGAVVIPL	0.97	0	OmpA	0.161472	3.87	NA	0.634527	0.27	WB
290	BoLA-DRB3_01804	VAGDHIATVGLGSVN	5	IATVGLGSV	0.98	0	OmpA	0.158493	3.98	NA	0.397096	18.05	WB
114	BoLA-DRB3_01804	LAPGVNVIDQIHVDP	4	VNVIDQIHV	0.96	0	OmpA	0.150723	4.31	NA	0.341472	29.56	WB
74	BoLA-DRB3_01804	ASALSLSLLSISRSG	3	LSLSLLSIS	0.99	0	OmpA	0.150236	4.33	NA	0.56577	1.56	WB
182	BoLA-DRB3_01804	TWPDMKIVNNIEVTG	4	MKIVNNIEV	0.94	0	OmpA	0.145904	4.52	NA	0.426185	13.25	WB
211	BoLA-DRB3_01804	LQSAINAVTGGPIAF	4	INAVTGGPI	1	0	OmpA	0.145173	4.56	NA	0.487863	6.01	WB
277	BoLA-DRB3_01804	RAKIVADYLVARGVA	3	IVADYLVAR	0.74	0	OmpA	0.144961	4.57	NA	0.469349	7.79	WB
120	BoLA-DRB3_01804	VIDQIHVDPVVRSLD	4	IHVDPVVRS	0.6	0	OmpA	0.144808	4.58	NA	0.487776	6.02	WB
102	BoLA-DRB3_01804	AKAALMTALNGLLAP	3	ALMTALNGL	0.55	0	OmpA	0.143378	4.65	NA	0.545021	2.37	WB
234	BoLA-DRB3_01901	PADYEILNRVADKLK	3	YEILNRVAD	0.99	0	OmpA	0.489033	0.31	NA	0.343431	17.26	SB
233	BoLA-DRB3_01901	IPADYEILNRVADKL	4	YEILNRVAD	0.98	0	OmpA	0.398766	0.58	NA	0.332131	19.98	SB
232	BoLA-DRB3_01901	LIPADYEILNRVADK	5	YEILNRVAD	0.98	0	OmpA	0.384854	0.65	NA	0.316745	24.17	SB
138	BoLA-DRB3_01901	AEPVFTASVPIPDFG	4	FTASVPIPD	0.97	0	OmpA	0.345508	0.87	NA	0.443032	3.42	SB
139	BoLA-DRB3_01901	EPVFTASVPIPDFGL	3	FTASVPIPD	0.98	0	OmpA	0.306218	1.19	NA	0.456672	2.59	WB
120	BoLA-DRB3_01901	VIDQIHVDPVVRSLD	4	IHVDPVVRS	0.98	0	OmpA	0.276777	1.52	NA	0.458005	2.51	WB
235	BoLA-DRB3_01901	ADYEILNRVADKLKA	2	YEILNRVAD	0.93	0	OmpA	0.258314	1.74	NA	0.340277	18.01	WB
137	BoLA-DRB3_01901	SAEPVFTASVPIPDF	5	FTASVPIPD	0.89	0	OmpA	0.253585	1.82	NA	0.441944	3.49	WB
121	BoLA-DRB3_01901	IDQIHVDPVVRSLDF	3	IHVDPVVRS	0.99	0	OmpA	0.248715	1.89	NA	0.462971	2.29	WB
183	BoLA-DRB3_01901	WPDMKIVNNIEVTGQ	3	MKIVNNIEV	0.88	0	OmpA	0.214407	2.46	NA	0.328865	20.83	WB
119	BoLA-DRB3_01901	NVIDQIHVDPVVRSL	5	IHVDPVVRS	0.78	0	OmpA	0.192558	2.95	NA	0.46442	2.22	WB
182	BoLA-DRB3_01901	TWPDMKIVNNIEVTG	4	MKIVNNIEV	0.94	0	OmpA	0.171092	3.49	NA	0.31854	23.64	WB
118	BoLA-DRB3_01901	VNVIDQIHVDPVVRS	6	IHVDPVVRS	0.56	0	OmpA	0.168409	3.58	NA	0.444457	3.32	WB
231	BoLA-DRB3_01901	SLIPADYEILNRVAD	6	YEILNRVAD	0.89	0	OmpA	0.145602	4.38	NA	0.31691	24.12	WB
184	BoLA-DRB3_01901	PDMKIVNNIEVTGQA	2	MKIVNNIEV	0.71	0	OmpA	0.143441	4.46	NA	0.323598	22.19	WB
136	BoLA-DRB3_01901	SSAEPVFTASVPIPD	6	FTASVPIPD	0.77	0	OmpA	0.136134	4.78	NA	0.384121	9.64	WB
280	BoLA-DRB3_01901	IVADYLVARGVAGDH	4	YLVARGVAG	0.96	0	OmpA	0.134903	4.84	NA	0.373072	11.37	WB
120	BoLA-DRB3_01902	VIDQIHVDPVVRSLD	4	IHVDPVVRS	0.98	0	OmpA	0.613485	0.13	NA	0.545073	0.42	SB
121	BoLA-DRB3_01902	IDQIHVDPVVRSLDF	3	IHVDPVVRS	1	0	OmpA	0.606485	0.14	NA	0.558316	0.3	SB
277	BoLA-DRB3_01902	RAKIVADYLVARGVA	3	IVADYLVAR	1	0	OmpA	0.493692	0.34	NA	0.540878	0.48	SB
119	BoLA-DRB3_01902	NVIDQIHVDPVVRSL	5	IHVDPVVRS	0.85	0	OmpA	0.489498	0.35	NA	0.555071	0.33	SB
276	BoLA-DRB3_01902	QRAKIVADYLVARGV	4	IVADYLVAR	1	0	OmpA	0.446884	0.48	NA	0.534267	0.57	SB
122	BoLA-DRB3_01902	DQIHVDPVVRSLDFS	2	IHVDPVVRS	0.96	0	OmpA	0.428288	0.56	NA	0.524653	0.73	SB
275	BoLA-DRB3_01902	AQRAKIVADYLVARG	5	IVADYLVAR	0.93	0	OmpA	0.382787	0.77	NA	0.514333	0.96	SB
118	BoLA-DRB3_01902	VNVIDQIHVDPVVRS	3	IDQIHVDPV	0.5	0	OmpA	0.370904	0.84	NA	0.520565	0.8	SB
183	BoLA-DRB3_01902	WPDMKIVNNIEVTGQ	3	MKIVNNIEV	0.77	0	OmpA	0.337969	1.08	NA	0.373829	13.36	WB
184	BoLA-DRB3_01902	PDMKIVNNIEVTGQA	2	MKIVNNIEV	0.52	0	OmpA	0.312719	1.28	NA	0.378297	12.52	WB
287	BoLA-DRB3_01902	ARGVAGDHIATVGLG	3	VAGDHIATV	1	0	OmpA	0.304509	1.37	NA	0.312177	27.54	WB
115	BoLA-DRB3_01902	APGVNVIDQIHVDPV	3	VNVIDQIHV	0.95	0	OmpA	0.303951	1.37	NA	0.340337	20.35	WB
114	BoLA-DRB3_01902	LAPGVNVIDQIHVDP	4	VNVIDQIHV	1	0	OmpA	0.295845	1.47	NA	0.293443	32.82	WB
182	BoLA-DRB3_01902	TWPDMKIVNNIEVTG	4	MKIVNNIEV	0.95	0	OmpA	0.264611	1.89	NA	0.348901	18.42	WB
278	BoLA-DRB3_01902	AKIVADYLVARGVAG	2	IVADYLVAR	0.94	0	OmpA	0.264545	1.89	NA	0.518066	0.87	WB
286	BoLA-DRB3_01902	VARGVAGDHIATVGL	4	VAGDHIATV	1	0	OmpA	0.258913	1.98	NA	0.32759	23.45	WB
185	BoLA-DRB3_01902	DMKIVNNIEVTGQAP	3	IVNNIEVTG	0.84	0	OmpA	0.248236	2.16	NA	0.354621	17.24	WB
117	BoLA-DRB3_01902	GVNVIDQIHVDPVVR	4	IDQIHVDPV	0.94	0	OmpA	0.247741	2.17	NA	0.397355	9.52	WB
285	BoLA-DRB3_01902	LVARGVAGDHIATVG	5	VAGDHIATV	1	0	OmpA	0.230283	2.49	NA	0.314351	26.96	WB
116	BoLA-DRB3_01902	PGVNVIDQIHVDPVV	2	VNVIDQIHV	0.54	0	OmpA	0.206969	3.01	NA	0.369177	14.27	WB
234	BoLA-DRB3_01902	PADYEILNRVADKLK	3	YEILNRVAD	0.77	0	OmpA	0.20087	3.17	NA	0.318548	25.8	WB
113	BoLA-DRB3_01902	LLAPGVNVIDQIHVD	5	VNVIDQIHV	0.99	0	OmpA	0.194526	3.34	NA	0.324324	24.25	WB
303	BoLA-DRB3_01902	VNPIASNATPEGRAK	3	IASNATPEG	1	0	OmpA	0.183003	3.69	NA	0.276804	37.89	WB
29	BoLA-DRB3_01902	RPWLIGAVVIPLLIA	3	LIGAVVIPL	0.9	0	OmpA	0.163224	4.38	NA	0.552288	0.35	WB
181	BoLA-DRB3_01902	STWPDMKIVNNIEVT	5	MKIVNNIEV	1	0	OmpA	0.162668	4.4	NA	0.318906	25.7	WB
274	BoLA-DRB3_01902	SAQRAKIVADYLVAR	6	IVADYLVAR	0.8	0	OmpA	0.154815	4.71	NA	0.502193	1.31	WB
288	BoLA-DRB3_01902	RGVAGDHIATVGLGS	2	VAGDHIATV	1	0	OmpA	0.150406	4.89	NA	0.286943	34.79	WB
183	BoLA-DRB3_01903	WPDMKIVNNIEVTGQ	3	MKIVNNIEV	0.89	0	OmpA	0.289328	1.13	NA	0.414942	22.76	WB
114	BoLA-DRB3_01903	LAPGVNVIDQIHVDP	4	VNVIDQIHV	1	0	OmpA	0.243133	1.71	NA	0.336086	43.53	WB
115	BoLA-DRB3_01903	APGVNVIDQIHVDPV	3	VNVIDQIHV	0.97	0	OmpA	0.239298	1.77	NA	0.408311	24.32	WB
182	BoLA-DRB3_01903	TWPDMKIVNNIEVTG	4	MKIVNNIEV	0.95	0	OmpA	0.234431	1.84	NA	0.404775	25.16	WB
234	BoLA-DRB3_01903	PADYEILNRVADKLK	3	YEILNRVAD	0.82	0	OmpA	0.219936	2.12	NA	0.377892	31.83	WB
120	BoLA-DRB3_01903	VIDQIHVDPVVRSLD	4	IHVDPVVRS	0.95	0	OmpA	0.211348	2.29	NA	0.519823	5.53	WB
184	BoLA-DRB3_01903	PDMKIVNNIEVTGQA	2	MKIVNNIEV	0.73	0	OmpA	0.203205	2.46	NA	0.40549	25	WB
121	BoLA-DRB3_01903	IDQIHVDPVVRSLDF	3	IHVDPVVRS	1	0	OmpA	0.191231	2.75	NA	0.516076	5.92	WB
118	BoLA-DRB3_01903	VNVIDQIHVDPVVRS	3	IDQIHVDPV	0.54	0	OmpA	0.170836	3.33	NA	0.532101	4.43	WB
138	BoLA-DRB3_01903	AEPVFTASVPIPDFG	4	FTASVPIPD	0.78	0	OmpA	0.161719	3.64	NA	0.438043	17.69	WB
119	BoLA-DRB3_01903	NVIDQIHVDPVVRSL	5	IHVDPVVRS	0.75	0	OmpA	0.156341	3.85	NA	0.540774	3.77	WB
181	BoLA-DRB3_01903	STWPDMKIVNNIEVT	5	MKIVNNIEV	0.98	0	OmpA	0.149302	4.15	NA	0.405695	24.95	WB
130	BoLA-DRB3_01903	VRSLDFSSAEPVFTA	3	LDFSSAEPV	0.85	0	OmpA	0.148133	4.21	NA	0.544892	3.47	WB
137	BoLA-DRB3_01903	SAEPVFTASVPIPDF	5	FTASVPIPD	0.59	0	OmpA	0.147327	4.24	NA	0.447063	15.91	WB
287	BoLA-DRB3_01903	ARGVAGDHIATVGLG	3	VAGDHIATV	0.99	0	OmpA	0.142363	4.47	NA	0.36808	34.45	WB
29	BoLA-DRB3_01903	RPWLIGAVVIPLLIA	3	LIGAVVIPL	0.91	0	OmpA	0.141131	4.53	NA	0.595546	1.06	WB
113	BoLA-DRB3_01903	LLAPGVNVIDQIHVD	5	VNVIDQIHV	0.98	0	OmpA	0.140503	4.56	NA	0.385516	29.87	WB
233	BoLA-DRB3_01903	IPADYEILNRVADKL	4	YEILNRVAD	0.86	0	OmpA	0.138975	4.64	NA	0.36398	35.61	WB
222	BoLA-DRB3_01903	PIAFGNDGASLIPAD	3	FGNDGASLI	1	0	OmpA	0.134639	4.85	NA	0.415248	22.69	WB
234	BoLA-DRB3_01904	PADYEILNRVADKLK	3	YEILNRVAD	1	0	OmpA	0.908062	0.01	NA	0.453965	7.52	SB
232	BoLA-DRB3_01904	LIPADYEILNRVADK	5	YEILNRVAD	1	0	OmpA	0.87179	0.01	NA	0.427405	11.56	SB
233	BoLA-DRB3_01904	IPADYEILNRVADKL	4	YEILNRVAD	1	0	OmpA	0.871261	0.01	NA	0.443575	9.02	SB
235	BoLA-DRB3_01904	ADYEILNRVADKLKA	2	YEILNRVAD	1	0	OmpA	0.761523	0.07	NA	0.447544	8.42	SB
231	BoLA-DRB3_01904	SLIPADYEILNRVAD	6	YEILNRVAD	0.99	0	OmpA	0.703738	0.15	NA	0.408884	14.98	SB
138	BoLA-DRB3_01904	AEPVFTASVPIPDFG	4	FTASVPIPD	0.98	0	OmpA	0.591705	0.48	NA	0.562991	0.63	SB
139	BoLA-DRB3_01904	EPVFTASVPIPDFGL	3	FTASVPIPD	1	0	OmpA	0.540684	0.73	NA	0.572465	0.47	SB
137	BoLA-DRB3_01904	SAEPVFTASVPIPDF	5	FTASVPIPD	0.92	0	OmpA	0.50433	0.95	NA	0.565848	0.57	SB
236	BoLA-DRB3_01904	DYEILNRVADKLKAC	1	YEILNRVAD	0.99	0	OmpA	0.433361	1.62	NA	0.42053	12.81	WB
183	BoLA-DRB3_01904	WPDMKIVNNIEVTGQ	3	MKIVNNIEV	0.97	0	OmpA	0.398856	2.06	NA	0.426668	11.69	WB
136	BoLA-DRB3_01904	SSAEPVFTASVPIPD	6	FTASVPIPD	0.81	0	OmpA	0.364978	2.59	NA	0.516145	2.16	WB
182	BoLA-DRB3_01904	TWPDMKIVNNIEVTG	4	MKIVNNIEV	1	0	OmpA	0.354416	2.78	NA	0.424211	12.13	WB
280	BoLA-DRB3_01904	IVADYLVARGVAGDH	4	YLVARGVAG	0.85	0	OmpA	0.333595	3.19	NA	0.413341	14.1	WB
115	BoLA-DRB3_01904	APGVNVIDQIHVDPV	3	VNVIDQIHV	0.83	0	OmpA	0.330191	3.26	NA	0.400143	16.8	WB
114	BoLA-DRB3_01904	LAPGVNVIDQIHVDP	4	VNVIDQIHV	0.99	0	OmpA	0.329401	3.28	NA	0.346423	30.32	WB
281	BoLA-DRB3_01904	VADYLVARGVAGDHI	3	YLVARGVAG	0.84	0	OmpA	0.295447	4.11	NA	0.40557	15.69	WB
140	BoLA-DRB3_01904	PVFTASVPIPDFGLK	2	FTASVPIPD	1	0	OmpA	0.288615	4.3	NA	0.535436	1.3	WB
184	BoLA-DRB3_01904	PDMKIVNNIEVTGQA	2	MKIVNNIEV	0.92	0	OmpA	0.266574	4.98	NA	0.414017	13.97	WB
103	BoLA-DRB3_0200101	KAALMTALNGLLAPG	4	MTALNGLLA	1	0	OmpA	0.591341	0.61	NA	0.745761	1.37	SB
104	BoLA-DRB3_0200101	AALMTALNGLLAPGV	3	MTALNGLLA	1	0	OmpA	0.56257	0.74	NA	0.756233	1.06	SB
102	BoLA-DRB3_0200101	AKAALMTALNGLLAP	5	MTALNGLLA	0.99	0	OmpA	0.473854	1.28	NA	0.756418	1.05	WB
212	BoLA-DRB3_0200101	QSAINAVTGGPIAFG	3	INAVTGGPI	1	0	OmpA	0.441105	1.53	NA	0.596565	16.39	WB
114	BoLA-DRB3_0200101	LAPGVNVIDQIHVDP	4	VNVIDQIHV	1	0	OmpA	0.402147	1.9	NA	0.497715	36	WB
115	BoLA-DRB3_0200101	APGVNVIDQIHVDPV	3	VNVIDQIHV	0.97	0	OmpA	0.396269	1.98	NA	0.534751	28.13	WB
211	BoLA-DRB3_0200101	LQSAINAVTGGPIAF	4	INAVTGGPI	1	0	OmpA	0.382656	2.15	NA	0.613088	13.71	WB
210	BoLA-DRB3_0200101	DLQSAINAVTGGPIA	5	INAVTGGPI	1	0	OmpA	0.362855	2.4	NA	0.596197	16.45	WB
105	BoLA-DRB3_0200101	ALMTALNGLLAPGVN	2	MTALNGLLA	0.68	0	OmpA	0.353505	2.52	NA	0.742553	1.48	WB
183	BoLA-DRB3_0200101	WPDMKIVNNIEVTGQ	3	MKIVNNIEV	1	0	OmpA	0.35346	2.52	NA	0.512628	32.76	WB
88	BoLA-DRB3_0200101	GNTVTLIGDFPDEAA	3	VTLIGDFPD	1	0	OmpA	0.345774	2.63	NA	0.540622	26.91	WB
234	BoLA-DRB3_0200101	PADYEILNRVADKLK	3	YEILNRVAD	0.95	0	OmpA	0.332501	2.83	NA	0.647313	9.05	WB
87	BoLA-DRB3_0200101	SGNTVTLIGDFPDEA	4	VTLIGDFPD	1	0	OmpA	0.311757	3.17	NA	0.527359	29.69	WB
182	BoLA-DRB3_0200101	TWPDMKIVNNIEVTG	4	MKIVNNIEV	0.99	0	OmpA	0.300523	3.38	NA	0.494206	36.78	WB
76	BoLA-DRB3_0200101	ALSLSLLSISRSGNT	3	LSLLSISRS	1	0	OmpA	0.292299	3.54	NA	0.766768	0.77	WB
75	BoLA-DRB3_0200101	SALSLSLLSISRSGN	4	LSLLSISRS	1	0	OmpA	0.273515	3.95	NA	0.76596	0.79	WB
113	BoLA-DRB3_0200101	LLAPGVNVIDQIHVD	5	VNVIDQIHV	1	0	OmpA	0.260021	4.25	NA	0.506178	34.13	WB
233	BoLA-DRB3_0200101	IPADYEILNRVADKL	4	YEILNRVAD	0.99	0	OmpA	0.249104	4.49	NA	0.607385	14.64	WB
184	BoLA-DRB3_0200101	PDMKIVNNIEVTGQA	2	MKIVNNIEV	0.81	0	OmpA	0.244711	4.6	NA	0.505834	34.21	WB
232	BoLA-DRB3_0200101	LIPADYEILNRVADK	5	YEILNRVAD	0.99	0	OmpA	0.23509	4.85	NA	0.567811	21.55	WB
86	BoLA-DRB3_0200101	RSGNTVTLIGDFPDE	5	VTLIGDFPD	1	0	OmpA	0.234408	4.87	NA	0.511588	32.98	WB
103	BoLA-DRB3_0200102	KAALMTALNGLLAPG	4	MTALNGLLA	1	0	OmpA	0.591341	0.61	NA	0.745761	1.37	SB
104	BoLA-DRB3_0200102	AALMTALNGLLAPGV	3	MTALNGLLA	1	0	OmpA	0.56257	0.74	NA	0.756233	1.06	SB
102	BoLA-DRB3_0200102	AKAALMTALNGLLAP	5	MTALNGLLA	0.99	0	OmpA	0.473854	1.28	NA	0.756418	1.05	WB
212	BoLA-DRB3_0200102	QSAINAVTGGPIAFG	3	INAVTGGPI	1	0	OmpA	0.441105	1.53	NA	0.596565	16.39	WB
114	BoLA-DRB3_0200102	LAPGVNVIDQIHVDP	4	VNVIDQIHV	1	0	OmpA	0.402147	1.9	NA	0.497715	36	WB
115	BoLA-DRB3_0200102	APGVNVIDQIHVDPV	3	VNVIDQIHV	0.97	0	OmpA	0.396269	1.98	NA	0.534751	28.13	WB
211	BoLA-DRB3_0200102	LQSAINAVTGGPIAF	4	INAVTGGPI	1	0	OmpA	0.382656	2.15	NA	0.613088	13.71	WB
210	BoLA-DRB3_0200102	DLQSAINAVTGGPIA	5	INAVTGGPI	1	0	OmpA	0.362855	2.4	NA	0.596197	16.45	WB
105	BoLA-DRB3_0200102	ALMTALNGLLAPGVN	2	MTALNGLLA	0.68	0	OmpA	0.353505	2.52	NA	0.742553	1.48	WB
183	BoLA-DRB3_0200102	WPDMKIVNNIEVTGQ	3	MKIVNNIEV	1	0	OmpA	0.35346	2.52	NA	0.512628	32.76	WB
88	BoLA-DRB3_0200102	GNTVTLIGDFPDEAA	3	VTLIGDFPD	1	0	OmpA	0.345774	2.63	NA	0.540622	26.91	WB
234	BoLA-DRB3_0200102	PADYEILNRVADKLK	3	YEILNRVAD	0.95	0	OmpA	0.332501	2.83	NA	0.647313	9.05	WB
87	BoLA-DRB3_0200102	SGNTVTLIGDFPDEA	4	VTLIGDFPD	1	0	OmpA	0.311757	3.17	NA	0.527359	29.69	WB
182	BoLA-DRB3_0200102	TWPDMKIVNNIEVTG	4	MKIVNNIEV	0.99	0	OmpA	0.300523	3.38	NA	0.494206	36.78	WB
76	BoLA-DRB3_0200102	ALSLSLLSISRSGNT	3	LSLLSISRS	1	0	OmpA	0.292299	3.54	NA	0.766768	0.77	WB
75	BoLA-DRB3_0200102	SALSLSLLSISRSGN	4	LSLLSISRS	1	0	OmpA	0.273515	3.95	NA	0.76596	0.79	WB
113	BoLA-DRB3_0200102	LLAPGVNVIDQIHVD	5	VNVIDQIHV	1	0	OmpA	0.260021	4.25	NA	0.506178	34.13	WB
233	BoLA-DRB3_0200102	IPADYEILNRVADKL	4	YEILNRVAD	0.99	0	OmpA	0.249104	4.49	NA	0.607385	14.64	WB
184	BoLA-DRB3_0200102	PDMKIVNNIEVTGQA	2	MKIVNNIEV	0.81	0	OmpA	0.244711	4.6	NA	0.505834	34.21	WB
232	BoLA-DRB3_0200102	LIPADYEILNRVADK	5	YEILNRVAD	0.99	0	OmpA	0.23509	4.85	NA	0.567811	21.55	WB
86	BoLA-DRB3_0200102	RSGNTVTLIGDFPDE	5	VTLIGDFPD	1	0	OmpA	0.234408	4.87	NA	0.511588	32.98	WB
103	BoLA-DRB3_02002	KAALMTALNGLLAPG	4	MTALNGLLA	1	0	OmpA	0.877121	0.48	NA	0.760902	0.79	SB
104	BoLA-DRB3_02002	AALMTALNGLLAPGV	3	MTALNGLLA	1	0	OmpA	0.863588	0.53	NA	0.781068	0.47	SB
102	BoLA-DRB3_02002	AKAALMTALNGLLAP	5	MTALNGLLA	1	0	OmpA	0.755297	1.02	NA	0.758516	0.84	WB
280	BoLA-DRB3_02002	IVADYLVARGVAGDH	4	YLVARGVAG	0.99	0	OmpA	0.686574	1.37	NA	0.683439	3.64	WB
281	BoLA-DRB3_02002	VADYLVARGVAGDHI	3	YLVARGVAG	1	0	OmpA	0.638362	1.64	NA	0.677521	4	WB
105	BoLA-DRB3_02002	ALMTALNGLLAPGVN	2	MTALNGLLA	0.87	0	OmpA	0.603052	1.85	NA	0.765014	0.72	WB
279	BoLA-DRB3_02002	KIVADYLVARGVAGD	5	YLVARGVAG	0.9	0	OmpA	0.584365	1.96	NA	0.68584	3.5	WB
234	BoLA-DRB3_02002	PADYEILNRVADKLK	3	YEILNRVAD	1	0	OmpA	0.414384	3.3	NA	0.568807	15.14	WB
212	BoLA-DRB3_02002	QSAINAVTGGPIAFG	3	INAVTGGPI	1	0	OmpA	0.393105	3.5	NA	0.632345	7.63	WB
282	BoLA-DRB3_02002	ADYLVARGVAGDHIA	2	YLVARGVAG	1	0	OmpA	0.339819	4.14	NA	0.644463	6.56	WB
211	BoLA-DRB3_02002	LQSAINAVTGGPIAF	4	INAVTGGPI	1	0	OmpA	0.322223	4.36	NA	0.635062	7.37	WB
233	BoLA-DRB3_02002	IPADYEILNRVADKL	4	YEILNRVAD	1	0	OmpA	0.318657	4.4	NA	0.539042	19.75	WB
106	BoLA-DRB3_02002	LMTALNGLLAPGVNV	4	LNGLLAPGV	0.81	0	OmpA	0.30843	4.53	NA	0.736383	1.41	WB
232	BoLA-DRB3_02002	LIPADYEILNRVADK	5	YEILNRVAD	1	0	OmpA	0.308211	4.53	NA	0.514696	23.98	WB
76	BoLA-DRB3_02002	ALSLSLLSISRSGNT	3	LSLLSISRS	1	0	OmpA	0.287254	4.83	NA	0.748806	1.06	WB
210	BoLA-DRB3_02002	DLQSAINAVTGGPIA	5	INAVTGGPI	1	0	OmpA	0.279803	4.94	NA	0.606807	10.33	WB
104	BoLA-DRB3_02003	AALMTALNGLLAPGV	3	MTALNGLLA	0.99	0	OmpA	0.569785	0.27	NA	0.747761	0.8	SB
103	BoLA-DRB3_02003	KAALMTALNGLLAPG	4	MTALNGLLA	0.98	0	OmpA	0.561506	0.29	NA	0.745896	0.84	SB
183	BoLA-DRB3_02003	WPDMKIVNNIEVTGQ	3	MKIVNNIEV	0.99	0	OmpA	0.490652	0.49	NA	0.480333	25.95	SB
182	BoLA-DRB3_02003	TWPDMKIVNNIEVTG	4	MKIVNNIEV	1	0	OmpA	0.414031	0.82	NA	0.457684	30.13	SB
184	BoLA-DRB3_02003	PDMKIVNNIEVTGQA	2	MKIVNNIEV	0.95	0	OmpA	0.373097	1.07	NA	0.474803	26.98	WB
102	BoLA-DRB3_02003	AKAALMTALNGLLAP	5	MTALNGLLA	0.96	0	OmpA	0.356946	1.18	NA	0.742876	0.91	WB
212	BoLA-DRB3_02003	QSAINAVTGGPIAFG	3	INAVTGGPI	1	0	OmpA	0.319303	1.49	NA	0.530612	17.93	WB
115	BoLA-DRB3_02003	APGVNVIDQIHVDPV	3	VNVIDQIHV	0.98	0	OmpA	0.292629	1.72	NA	0.438066	33.85	WB
114	BoLA-DRB3_02003	LAPGVNVIDQIHVDP	4	VNVIDQIHV	0.99	0	OmpA	0.277739	1.89	NA	0.416196	38.09	WB
181	BoLA-DRB3_02003	STWPDMKIVNNIEVT	5	MKIVNNIEV	1	0	OmpA	0.275249	1.92	NA	0.444316	32.65	WB
105	BoLA-DRB3_02003	ALMTALNGLLAPGVN	2	MTALNGLLA	0.91	0	OmpA	0.264021	2.06	NA	0.724004	1.42	WB
211	BoLA-DRB3_02003	LQSAINAVTGGPIAF	4	INAVTGGPI	1	0	OmpA	0.258843	2.14	NA	0.545469	15.8	WB
118	BoLA-DRB3_02003	VNVIDQIHVDPVVRS	3	IDQIHVDPV	0.92	0	OmpA	0.246798	2.31	NA	0.507455	21.52	WB
76	BoLA-DRB3_02003	ALSLSLLSISRSGNT	3	LSLLSISRS	1	0	OmpA	0.246451	2.31	NA	0.78498	0.29	WB
34	BoLA-DRB3_02003	GAVVIPLLIAAIGYG	3	VIPLLIAAI	1	0	OmpA	0.217972	2.79	NA	0.621979	7.25	WB
210	BoLA-DRB3_02003	DLQSAINAVTGGPIA	5	INAVTGGPI	0.99	0	OmpA	0.217403	2.8	NA	0.513372	20.6	WB
75	BoLA-DRB3_02003	SALSLSLLSISRSGN	4	LSLLSISRS	1	0	OmpA	0.211073	2.91	NA	0.786674	0.28	WB
120	BoLA-DRB3_02003	VIDQIHVDPVVRSLD	4	IHVDPVVRS	0.96	0	OmpA	0.192972	3.31	NA	0.512991	20.65	WB
117	BoLA-DRB3_02003	GVNVIDQIHVDPVVR	4	IDQIHVDPV	0.98	0	OmpA	0.191565	3.35	NA	0.474808	26.98	WB
121	BoLA-DRB3_02003	IDQIHVDPVVRSLDF	3	IHVDPVVRS	1	0	OmpA	0.190382	3.37	NA	0.512969	20.66	WB
244	BoLA-DRB3_02003	ADKLKACPDARVTIN	3	LKACPDARV	1	0	OmpA	0.153944	4.38	NA	0.441023	33.29	WB
116	BoLA-DRB3_02003	PGVNVIDQIHVDPVV	2	VNVIDQIHV	0.52	0	OmpA	0.153521	4.39	NA	0.45382	30.85	WB
88	BoLA-DRB3_02003	GNTVTLIGDFPDEAA	3	VTLIGDFPD	0.98	0	OmpA	0.150574	4.49	NA	0.40728	39.83	WB
119	BoLA-DRB3_02003	NVIDQIHVDPVVRSL	5	IHVDPVVRS	0.5	0	OmpA	0.146217	4.64	NA	0.522134	19.21	WB
33	BoLA-DRB3_02003	IGAVVIPLLIAAIGY	4	VIPLLIAAI	0.99	0	OmpA	0.145631	4.66	NA	0.607548	8.57	WB
88	BoLA-DRB3_02004	GNTVTLIGDFPDEAA	3	VTLIGDFPD	1	0	OmpA	0.41427	0.72	NA	0.487127	29.54	SB
183	BoLA-DRB3_02004	WPDMKIVNNIEVTGQ	3	MKIVNNIEV	0.99	0	OmpA	0.385772	0.88	NA	0.492598	28.49	SB
87	BoLA-DRB3_02004	SGNTVTLIGDFPDEA	4	VTLIGDFPD	1	0	OmpA	0.365547	1.02	NA	0.452619	36.46	WB
103	BoLA-DRB3_02004	KAALMTALNGLLAPG	4	MTALNGLLA	0.92	0	OmpA	0.344811	1.16	NA	0.700572	2.54	WB
182	BoLA-DRB3_02004	TWPDMKIVNNIEVTG	4	MKIVNNIEV	0.99	0	OmpA	0.336394	1.24	NA	0.476105	31.66	WB
104	BoLA-DRB3_02004	AALMTALNGLLAPGV	3	MTALNGLLA	0.97	0	OmpA	0.324877	1.36	NA	0.71	2.11	WB
212	BoLA-DRB3_02004	QSAINAVTGGPIAFG	3	INAVTGGPI	1	0	OmpA	0.292447	1.77	NA	0.529182	21.94	WB
184	BoLA-DRB3_02004	PDMKIVNNIEVTGQA	2	MKIVNNIEV	0.96	0	OmpA	0.282519	1.88	NA	0.478832	31.14	WB
114	BoLA-DRB3_02004	LAPGVNVIDQIHVDP	4	VNVIDQIHV	1	0	OmpA	0.268189	2.1	NA	0.463113	34.3	WB
115	BoLA-DRB3_02004	APGVNVIDQIHVDPV	3	VNVIDQIHV	0.96	0	OmpA	0.264549	2.16	NA	0.494252	28.18	WB
86	BoLA-DRB3_02004	RSGNTVTLIGDFPDE	5	VTLIGDFPD	1	0	OmpA	0.250051	2.41	NA	0.428755	41.44	WB
211	BoLA-DRB3_02004	LQSAINAVTGGPIAF	4	INAVTGGPI	1	0	OmpA	0.244401	2.52	NA	0.546834	18.98	WB
181	BoLA-DRB3_02004	STWPDMKIVNNIEVT	5	MKIVNNIEV	1	0	OmpA	0.23711	2.66	NA	0.475248	31.82	WB
102	BoLA-DRB3_02004	AKAALMTALNGLLAP	5	MTALNGLLA	0.87	0	OmpA	0.234744	2.7	NA	0.709782	2.12	WB
210	BoLA-DRB3_02004	DLQSAINAVTGGPIA	5	INAVTGGPI	1	0	OmpA	0.222261	2.95	NA	0.518573	23.85	WB
34	BoLA-DRB3_02004	GAVVIPLLIAAIGYG	3	VIPLLIAAI	0.98	0	OmpA	0.201809	3.4	NA	0.622286	8.66	WB
234	BoLA-DRB3_02004	PADYEILNRVADKLK	3	YEILNRVAD	0.92	0	OmpA	0.191813	3.67	NA	0.572337	14.99	WB
89	BoLA-DRB3_02004	NTVTLIGDFPDEAAK	2	VTLIGDFPD	0.84	0	OmpA	0.190949	3.69	NA	0.48494	29.96	WB
118	BoLA-DRB3_02004	VNVIDQIHVDPVVRS	3	IDQIHVDPV	0.88	0	OmpA	0.190092	3.72	NA	0.518486	23.86	WB
126	BoLA-DRB3_02004	VDPVVRSLDFSSAEP	4	VRSLDFSSA	0.73	0	OmpA	0.165672	4.54	NA	0.576192	14.45	WB
127	BoLA-DRB3_02004	DPVVRSLDFSSAEPV	3	VRSLDFSSA	0.82	0	OmpA	0.161345	4.7	NA	0.586094	13.07	WB
105	BoLA-DRB3_02004	ALMTALNGLLAPGVN	2	MTALNGLLA	0.72	0	OmpA	0.159622	4.77	NA	0.696995	2.72	WB
116	BoLA-DRB3_02004	PGVNVIDQIHVDPVV	2	VNVIDQIHV	0.57	0	OmpA	0.156033	4.91	NA	0.506152	26.04	WB
117	BoLA-DRB3_02004	GVNVIDQIHVDPVVR	4	IDQIHVDPV	0.96	0	OmpA	0.155705	4.92	NA	0.515459	24.38	WB
113	BoLA-DRB3_02004	LLAPGVNVIDQIHVD	5	VNVIDQIHV	1	0	OmpA	0.155046	4.95	NA	0.479902	30.94	WB
104	BoLA-DRB3_02005	AALMTALNGLLAPGV	3	MTALNGLLA	0.99	0	OmpA	0.516938	0.34	NA	0.780282	1.45	SB
103	BoLA-DRB3_02005	KAALMTALNGLLAPG	4	MTALNGLLA	0.96	0	OmpA	0.499738	0.39	NA	0.776702	1.59	SB
183	BoLA-DRB3_02005	WPDMKIVNNIEVTGQ	3	MKIVNNIEV	0.96	0	OmpA	0.468348	0.51	NA	0.516611	29.9	SB
182	BoLA-DRB3_02005	TWPDMKIVNNIEVTG	4	MKIVNNIEV	0.99	0	OmpA	0.398757	0.83	NA	0.496905	33.38	SB
115	BoLA-DRB3_02005	APGVNVIDQIHVDPV	3	VNVIDQIHV	0.97	0	OmpA	0.38901	0.88	NA	0.495235	33.67	SB
114	BoLA-DRB3_02005	LAPGVNVIDQIHVDP	4	VNVIDQIHV	0.98	0	OmpA	0.368253	1.01	NA	0.46784	38.53	WB
184	BoLA-DRB3_02005	PDMKIVNNIEVTGQA	2	MKIVNNIEV	0.85	0	OmpA	0.367149	1.02	NA	0.516487	29.92	WB
76	BoLA-DRB3_02005	ALSLSLLSISRSGNT	3	LSLLSISRS	1	0	OmpA	0.302152	1.58	NA	0.850408	0.17	WB
102	BoLA-DRB3_02005	AKAALMTALNGLLAP	5	MTALNGLLA	0.94	0	OmpA	0.29464	1.66	NA	0.772249	1.76	WB
120	BoLA-DRB3_02005	VIDQIHVDPVVRSLD	4	IHVDPVVRS	0.99	0	OmpA	0.281118	1.82	NA	0.591833	18	WB
121	BoLA-DRB3_02005	IDQIHVDPVVRSLDF	3	IHVDPVVRS	1	0	OmpA	0.280697	1.83	NA	0.60083	16.75	WB
212	BoLA-DRB3_02005	QSAINAVTGGPIAFG	3	INAVTGGPI	1	0	OmpA	0.267964	1.99	NA	0.591638	18.03	WB
75	BoLA-DRB3_02005	SALSLSLLSISRSGN	4	LSLLSISRS	1	0	OmpA	0.264262	2.04	NA	0.850919	0.17	WB
181	BoLA-DRB3_02005	STWPDMKIVNNIEVT	5	MKIVNNIEV	1	0	OmpA	0.257256	2.16	NA	0.486922	35.14	WB
118	BoLA-DRB3_02005	VNVIDQIHVDPVVRS	3	IDQIHVDPV	0.86	0	OmpA	0.247031	2.33	NA	0.580899	19.55	WB
105	BoLA-DRB3_02005	ALMTALNGLLAPGVN	2	MTALNGLLA	0.94	0	OmpA	0.229551	2.64	NA	0.757181	2.38	WB
34	BoLA-DRB3_02005	GAVVIPLLIAAIGYG	3	VIPLLIAAI	0.99	0	OmpA	0.225143	2.72	NA	0.705567	5.59	WB
116	BoLA-DRB3_02005	PGVNVIDQIHVDPVV	2	VNVIDQIHV	0.74	0	OmpA	0.205077	3.12	NA	0.516475	29.92	WB
113	BoLA-DRB3_02005	LLAPGVNVIDQIHVD	5	VNVIDQIHV	1	0	OmpA	0.204185	3.14	NA	0.489198	34.74	WB
211	BoLA-DRB3_02005	LQSAINAVTGGPIAF	4	INAVTGGPI	1	0	OmpA	0.199217	3.25	NA	0.599088	16.98	WB
117	BoLA-DRB3_02005	GVNVIDQIHVDPVVR	4	IDQIHVDPV	0.96	0	OmpA	0.188457	3.51	NA	0.54388	25.35	WB
234	BoLA-DRB3_02005	PADYEILNRVADKLK	3	YEILNRVAD	0.93	0	OmpA	0.183402	3.65	NA	0.567553	21.56	WB
119	BoLA-DRB3_02005	NVIDQIHVDPVVRSL	5	IHVDPVVRS	0.65	0	OmpA	0.178309	3.8	NA	0.602625	16.51	WB
210	BoLA-DRB3_02005	DLQSAINAVTGGPIA	5	INAVTGGPI	0.99	0	OmpA	0.157689	4.47	NA	0.572953	20.74	WB
33	BoLA-DRB3_02005	IGAVVIPLLIAAIGY	4	VIPLLIAAI	0.97	0	OmpA	0.15098	4.72	NA	0.690619	6.75	WB
120	BoLA-DRB3_02008	VIDQIHVDPVVRSLD	4	IHVDPVVRS	1	0	OmpA	0.223641	0.78	NA	0.415173	10.71	SB
121	BoLA-DRB3_02008	IDQIHVDPVVRSLDF	3	IHVDPVVRS	0.99	0	OmpA	0.214298	0.87	NA	0.410413	11.34	SB
76	BoLA-DRB3_02008	ALSLSLLSISRSGNT	3	LSLLSISRS	0.99	0	OmpA	0.197745	1.07	NA	0.601536	0.34	WB
115	BoLA-DRB3_02008	APGVNVIDQIHVDPV	3	VNVIDQIHV	0.95	0	OmpA	0.189778	1.19	NA	0.332732	25.31	WB
104	BoLA-DRB3_02008	AALMTALNGLLAPGV	3	MTALNGLLA	0.99	0	OmpA	0.184727	1.28	NA	0.514751	2.44	WB
118	BoLA-DRB3_02008	VNVIDQIHVDPVVRS	3	IDQIHVDPV	0.8	0	OmpA	0.178734	1.38	NA	0.417287	10.45	WB
114	BoLA-DRB3_02008	LAPGVNVIDQIHVDP	4	VNVIDQIHV	0.99	0	OmpA	0.178027	1.39	NA	0.292068	35.34	WB
103	BoLA-DRB3_02008	KAALMTALNGLLAPG	4	MTALNGLLA	0.99	0	OmpA	0.169298	1.55	NA	0.503413	2.97	WB
75	BoLA-DRB3_02008	SALSLSLLSISRSGN	4	LSLLSISRS	0.98	0	OmpA	0.168978	1.56	NA	0.602397	0.33	WB
277	BoLA-DRB3_02008	RAKIVADYLVARGVA	3	IVADYLVAR	0.71	0	OmpA	0.161312	1.72	NA	0.451507	6.67	WB
212	BoLA-DRB3_02008	QSAINAVTGGPIAFG	3	INAVTGGPI	1	0	OmpA	0.148669	2.03	NA	0.370546	17.7	WB
119	BoLA-DRB3_02008	NVIDQIHVDPVVRSL	5	IHVDPVVRS	0.68	0	OmpA	0.14361	2.19	NA	0.426154	9.39	WB
117	BoLA-DRB3_02008	GVNVIDQIHVDPVVR	4	IDQIHVDPV	0.95	0	OmpA	0.135729	2.43	NA	0.361256	19.46	WB
34	BoLA-DRB3_02008	GAVVIPLLIAAIGYG	3	VIPLLIAAI	0.94	0	OmpA	0.133593	2.5	NA	0.526077	1.97	WB
183	BoLA-DRB3_02008	WPDMKIVNNIEVTGQ	3	MKIVNNIEV	0.82	0	OmpA	0.125913	2.81	NA	0.321802	27.84	WB
126	BoLA-DRB3_02008	VDPVVRSLDFSSAEP	4	VRSLDFSSA	0.71	0	OmpA	0.125882	2.81	NA	0.387472	14.76	WB
186	BoLA-DRB3_02008	MKIVNNIEVTGQAPP	3	VNNIEVTGQ	0.83	0	OmpA	0.123182	2.92	NA	0.289925	35.9	WB
127	BoLA-DRB3_02008	DPVVRSLDFSSAEPV	3	VRSLDFSSA	0.89	0	OmpA	0.122666	2.94	NA	0.401029	12.69	WB
276	BoLA-DRB3_02008	QRAKIVADYLVARGV	4	IVADYLVAR	0.76	0	OmpA	0.121119	3.01	NA	0.43311	8.58	WB
211	BoLA-DRB3_02008	LQSAINAVTGGPIAF	4	INAVTGGPI	1	0	OmpA	0.113822	3.35	NA	0.367285	18.31	WB
278	BoLA-DRB3_02008	AKIVADYLVARGVAG	3	VADYLVARG	0.53	0	OmpA	0.111139	3.48	NA	0.443227	7.49	WB
122	BoLA-DRB3_02008	DQIHVDPVVRSLDFS	2	IHVDPVVRS	0.96	0	OmpA	0.111114	3.48	NA	0.375817	16.71	WB
234	BoLA-DRB3_02008	PADYEILNRVADKLK	3	YEILNRVAD	0.82	0	OmpA	0.110383	3.52	NA	0.318818	28.58	WB
185	BoLA-DRB3_02008	DMKIVNNIEVTGQAP	4	VNNIEVTGQ	0.57	0	OmpA	0.108305	3.63	NA	0.312392	30.14	WB
116	BoLA-DRB3_02008	PGVNVIDQIHVDPVV	2	VNVIDQIHV	0.56	0	OmpA	0.107172	3.7	NA	0.347076	22.21	WB
184	BoLA-DRB3_02008	PDMKIVNNIEVTGQA	2	MKIVNNIEV	0.5	0	OmpA	0.104606	3.84	NA	0.327199	26.54	WB
291	BoLA-DRB3_02008	AGDHIATVGLGSVNP	4	IATVGLGSV	0.97	0	OmpA	0.098222	4.23	NA	0.298192	33.73	WB
292	BoLA-DRB3_02008	GDHIATVGLGSVNPI	3	IATVGLGSV	1	0	OmpA	0.094331	4.48	NA	0.313899	29.78	WB
210	BoLA-DRB3_02008	DLQSAINAVTGGPIA	5	INAVTGGPI	0.98	0	OmpA	0.093327	4.56	NA	0.34929	21.75	WB
113	BoLA-DRB3_02008	LLAPGVNVIDQIHVD	5	VNVIDQIHV	0.99	0	OmpA	0.091479	4.71	NA	0.302747	32.6	WB
33	BoLA-DRB3_02008	IGAVVIPLLIAAIGY	4	VIPLLIAAI	0.92	0	OmpA	0.090989	4.75	NA	0.516916	2.35	WB
303	BoLA-DRB3_02008	VNPIASNATPEGRAK	3	IASNATPEG	0.99	0	OmpA	0.089905	4.84	NA	0.176055	69.94	WB
103	BoLA-DRB3_02009	KAALMTALNGLLAPG	4	MTALNGLLA	1	0	OmpA	0.591341	0.61	NA	0.745761	1.37	SB
104	BoLA-DRB3_02009	AALMTALNGLLAPGV	3	MTALNGLLA	1	0	OmpA	0.56257	0.74	NA	0.756233	1.06	SB
102	BoLA-DRB3_02009	AKAALMTALNGLLAP	5	MTALNGLLA	0.99	0	OmpA	0.473854	1.28	NA	0.756418	1.05	WB
212	BoLA-DRB3_02009	QSAINAVTGGPIAFG	3	INAVTGGPI	1	0	OmpA	0.441105	1.53	NA	0.596565	16.39	WB
114	BoLA-DRB3_02009	LAPGVNVIDQIHVDP	4	VNVIDQIHV	1	0	OmpA	0.402147	1.9	NA	0.497715	36	WB
115	BoLA-DRB3_02009	APGVNVIDQIHVDPV	3	VNVIDQIHV	0.97	0	OmpA	0.396269	1.98	NA	0.534751	28.13	WB
211	BoLA-DRB3_02009	LQSAINAVTGGPIAF	4	INAVTGGPI	1	0	OmpA	0.382656	2.15	NA	0.613088	13.71	WB
210	BoLA-DRB3_02009	DLQSAINAVTGGPIA	5	INAVTGGPI	1	0	OmpA	0.362855	2.4	NA	0.596197	16.45	WB
105	BoLA-DRB3_02009	ALMTALNGLLAPGVN	2	MTALNGLLA	0.68	0	OmpA	0.353505	2.52	NA	0.742553	1.48	WB
183	BoLA-DRB3_02009	WPDMKIVNNIEVTGQ	3	MKIVNNIEV	1	0	OmpA	0.35346	2.52	NA	0.512628	32.76	WB
88	BoLA-DRB3_02009	GNTVTLIGDFPDEAA	3	VTLIGDFPD	1	0	OmpA	0.345774	2.63	NA	0.540622	26.91	WB
234	BoLA-DRB3_02009	PADYEILNRVADKLK	3	YEILNRVAD	0.95	0	OmpA	0.332501	2.83	NA	0.647313	9.05	WB
87	BoLA-DRB3_02009	SGNTVTLIGDFPDEA	4	VTLIGDFPD	1	0	OmpA	0.311757	3.17	NA	0.527359	29.69	WB
182	BoLA-DRB3_02009	TWPDMKIVNNIEVTG	4	MKIVNNIEV	0.99	0	OmpA	0.300523	3.38	NA	0.494206	36.78	WB
76	BoLA-DRB3_02009	ALSLSLLSISRSGNT	3	LSLLSISRS	1	0	OmpA	0.292299	3.54	NA	0.766768	0.77	WB
75	BoLA-DRB3_02009	SALSLSLLSISRSGN	4	LSLLSISRS	1	0	OmpA	0.273515	3.95	NA	0.76596	0.79	WB
113	BoLA-DRB3_02009	LLAPGVNVIDQIHVD	5	VNVIDQIHV	1	0	OmpA	0.260021	4.25	NA	0.506178	34.13	WB
233	BoLA-DRB3_02009	IPADYEILNRVADKL	4	YEILNRVAD	0.99	0	OmpA	0.249104	4.49	NA	0.607385	14.64	WB
[truncated: 9,290 more rows]

## Sheet: MHC2 Epitope Count
Pos	Peptide	Appearance Count	Identify		Pos	Peptide	Appearance Count	Identify		Pos	Peptide	Appearance Count	Identify
183	WPDMKIVNNIEVTGQ	345	OmpA		3	EQQWNFAGIEAAASA	200	Esat-6		73	STNIRQAGVQYSRAD	203	Cfp-10
184	PDMKIVNNIEVTGQA	318	OmpA		2	TEQQWNFAGIEAAAS	162	Esat-6		72	ISTNIRQAGVQYSRA	150	Cfp-10
182	TWPDMKIVNNIEVTG	316	OmpA		19	QGNVTSIHSLLDEGK	133	Esat-6		78	QAGVQYSRADEEQQQ	129	Cfp-10
118	VNVIDQIHVDPVVRS	251	OmpA		4	QQWNFAGIEAAASAI	122	Esat-6		40	QGQWRGAAGTAAQAA	93	Cfp-10
138	AEPVFTASVPIPDFG	232	OmpA		5	QWNFAGIEAAASAIQ	119	Esat-6		79	AGVQYSRADEEQQQA	86	Cfp-10
120	VIDQIHVDPVVRSLD	217	OmpA		7	NFAGIEAAASAIQGN	104	Esat-6		77	RQAGVQYSRADEEQQ	76	Cfp-10
234	PADYEILNRVADKLK	209	OmpA		8	FAGIEAAASAIQGNV	96	Esat-6		74	TNIRQAGVQYSRADE	71	Cfp-10
119	NVIDQIHVDPVVRSL	207	OmpA		1	MTEQQWNFAGIEAAA	92	Esat-6		39	LQGQWRGAAGTAAQA	68	Cfp-10
[truncated: 150 more rows]

## Sheet: B cell Epitope Candidate
Rank	Sequence	Start position	Score	Identifier		Rank	Sequence	Start position	Score		Rank	Sequence	Start position	Score
[truncated: 35 more rows]
